# Supplementary material for: Rapid binding to protofilament edge sites facilitates tip tracking of EB1 at growing microtubule plus-ends
Source: eLife. 2024 Feb 22;13:e91719. doi: 10.7554/eLife.91719 (PMC10883673; doi:10.7554/eLife.91719)
Supplement: Figure 1—figure supplement 1—source data 1. [file elife-91719-fig1-figsupp1-data1.xlsx]

## Sheet: Fig 1 Fig Sup1 B Left
	Tip Std Dev Simulation
count	76
average	190.634
			Tip Std Dev length	bin name	count
data	103.035		100-120	120	3
	109.571		121-140	140	8
	114.615		141-160	160	13
	121.596		161-180	180	16
	123.744		181-200	200	7
	125.239		201-220	220	10
	127.533		221-240	240	5
	128.568		241-260	260	4
	128.966		261-280	280	4
	135.152		281-300	300	4
	138.142		301-320	320	2
	140.042
	141.558
	145.309
	149.301
	150.741
	151.605
	152.27
	152.83
	153.991
	154.506
	155.541
	156.218
	158.58
	160.039
	161.032
	165.37
	166.858
	167.276
	168.941
	169.925
	171.021
	171.1
	171.198
	172.498
	176.252
	178.883
	179.132
	179.261
	179.286
	180.203
	180.883
	183.676
	185.006
	186.49
	191.605
	194.009
	201.054
	201.137
	204.439
	205.635
	208.588
	213.188
	213.402
	214.185
	214.618
	216.641
	223.66
	223.873
	224.308
	224.396
	238.676
	245.62
	246.238
	255.876
	258.873
	276.033
	277.02
	278.153
	279.944
	281.451
	286.568
	291.079
	295.052
	313.405
	316.445

## Sheet: Fig 1 Fig Sup 1 B right
	TaperBetween 200 and 400 nM	Taper between 400 and 600 nM
count	15	17
average	136.533	143.059
data	192	128
	128	192
	128	128
	128	64
	128	192
	192	128
	64	128
	128	192
	128	64
	128	128
	128	128
	128	192
	128	192
	128	192
	192	128
		128
		128

## Sheet: Fig 1 Fig Sup 1 C
Position	Splayed rules normalized average	Normal rules normalized average			Splayed rules average background subtracted	Normal rules average background subtracted		Splayed rules average	Normal rules average	Splayed rules individuals	Position	splayed run1	splayed run2	splayed run3	splayed run4	splayed run5	splayed run6	splayed run7	splayed run8	splayed run9	splayed run10	splayed run11	splayed run12	splayed run13	splayed run14	splayed run15	splayed run16	splayed run17	splayed run18	splayed run19	splayed run20	splayed run21	splayed run22	splayed run23	splayed run24	splayed run25	splayed run26	splayed run27	splayed run28	splayed run29	splayed run30			Position	Normal run1	Normal run2	Normal run3	Normal run4	Normal run5
2496	0.0601352	0.0441752			9.54667	6.81684		60.26	59.1916		2496	62.8	41.8	52.2	56.6	52.8	49.6	48.6	72.8	78.8	58	60.2	72.2	74.8	50.2	52.2	71.4	59.4	51.4	53.6	72.6	60	69.4	67.4	69	52.6	68	62	51.6	44.2	71.6			2496	73.8	48.8	54.2	66.4	62.4
2432	0.0628228	0.0478344			9.97333	7.38151		60.6867	59.7562		2432	61.2	41.8	52.6	56.6	53.2	50	48.8	71	78.2	57.8	58.6	69.4	76.4	54	51.4	70.4	59.2	53.6	53.8	72.6	61	71.8	68.8	70.4	54.2	70	64	49.8	44.6	75.4			2432	73	48.6	54.4	68.8	61.6
2368	0.0665603	0.0531536			10.5667	8.20235		61.28	60.5771		2368	60	43	53.2	56	53	52.4	49.6	69.8	78.8	58	57.2	66	76.6	58.8	51	69.8	59.2	57.4	55	72.4	62.2	74	70.2	72.6	55.2	70.2	65.8	48	44.6	78.4			2368	72.4	48.8	55.2	71.4	60.2
2304	0.0711376	0.0594044			11.2933	9.16693		62.0067	61.5417		2304	59	45	53.4	55.4	52.6	56.8	51.2	69.6	80.6	58.2	56	63.8	75.8	63.6	50.4	68.8	60.6	61.2	57.2	71	64.2	76	71.2	75	56.2	69	66.8	46	45.4	80.2			2304	72.2	49.8	56	74.8	58.4
2240	0.0762189	0.0661826			12.1	10.2129		62.8133	62.5876		2240	59.2	47	52.6	54.8	52.6	61.6	52.2	69.6	82.8	58	55.6	63	74.8	69	50.4	67.8	63.6	66.2	59	69.6	66.2	77.2	71.6	77	57	66.6	67.2	44.4	46.8	81			2240	72.8	52	57.4	77.6	57.6
2176	0.0803763	0.0735046			12.76	11.3428		63.4733	63.7175		2176	60.4	48.2	50.8	53.8	53	66.2	53.4	69.6	84.8	56.6	55.8	63.8	73.8	72.6	50.4	66	66.8	71.6	60.8	68.2	67	78.4	71.4	78.8	56.8	64.8	67.2	43.2	49.4	80.6			2176	74	54.8	58.8	80.4	58.6
2112	0.0855835	0.0808267			13.5867	12.4727		64.3	64.8474		2112	63.2	50	48.8	53.2	54	70.4	53.8	69.6	85.8	54.8	56.6	66.2	74.2	76.2	50.8	64.2	70.2	75.4	62.4	68.2	67.4	80.2	70.6	79.6	56.4	64	67.2	42.4	53.2	80			2112	75.2	59	60	82.2	62.2
2048	0.0912527	0.0882423			14.4867	13.617		65.2	65.9918		2048	67.2	51.8	47.6	53.2	55.4	72.4	55	69	85.8	53.8	58.2	69	75.6	78.6	51.6	62.4	73.2	78.2	63.2	69.4	66.6	81.8	69.8	79.6	56.4	65	67	42.2	58.4	78.6			2048	76.4	63.8	61.4	82.8	67.6
1984	0.0979297	0.0954441			15.5467	14.7284		66.26	67.1031		1984	71.6	54.8	48	53.8	57.4	73	55.8	68.2	84	53	61.2	71.2	78.8	79.6	52.6	61.6	74.8	78.8	64.8	71.2	65.8	82.2	69.2	79.2	57.6	67.8	67	42.8	64	78			1984	77.2	69	63	82.2	74
1920	0.105489	0.10298			16.7467	15.8912		67.46	68.266		1920	76	57.8	50.2	56.2	59.4	72.6	58	68	81.2	53.6	64.8	73	81.6	79.8	53.4	62.2	75.2	78	65.6	75.2	64.6	82.8	69	78.4	59.2	70.2	66.8	45	69	77			1920	76.6	73.4	65	80.6	80.4
1856	0.113803	0.110823			18.0667	17.1016		68.78	69.4763		1856	79.4	61.2	54	60.4	62.4	72	61	68.4	78.2	54.6	68.6	74	84.8	78.6	54.8	63.6	74	75.8	67.6	79.2	63.8	82.2	68.6	77.4	61.8	72	66.6	48.8	72.6	77			1856	74.6	76.6	67.4	78.2	85.4
1792	0.122118	0.119602			19.3867	18.4562		70.1	70.8309		1792	80.6	64.2	58.6	65.6	65.4	71.8	65.4	70.2	75.6	56.6	72.4	73.2	87	77	57	65.8	71.8	73.2	69	83.2	63.4	81.4	68.4	77	65	72.2	66	53.8	74.8	77.4			1792	71.8	78.4	70.4	76.2	87.8
1728	0.130433	0.128393			20.7067	19.8129		71.42	72.1876		1728	80.4	66	63	72.2	68.2	71	69.6	73	73.8	58.4	75.6	72.2	88	75.2	60.6	68	69.8	70.8	71.4	87.2	64.2	80.6	68.6	76.4	67.8	71.6	65.8	59.4	75.2	78.6			1728	69	79	73.4	74.8	87.2
1664	0.138034	0.136798			21.9133	21.1098		72.6267	73.4845		1664	79.2	67.2	67	78.8	71.2	71.6	73.2	75.8	73	60.2	78	71.4	88.6	74.4	64.8	69.8	67.2	68.8	73.4	89.8	65.6	79.8	69	75.6	70	70.2	65	65.2	75.2	79.8			1664	67	78.4	76.2	74.6	84.4
1600	0.145593	0.144547			23.1133	22.3057		73.8267	74.6804		1600	77.8	67.2	70	85.2	73.6	73.6	76.6	78	72	62.2	79.4	71.6	88.4	74.8	69.8	71.2	66.2	67.8	75.6	91	67.8	79.6	70.8	74	71.2	69.2	63.6	70.6	75.2	80.8			1600	66.4	78	78	74.6	80.4
1536	0.151892	0.15072			24.1133	23.2583		74.8267	75.633		1536	76.8	66.8	72	88.6	76	75.4	78.4	79.6	71.6	64.4	80	72.6	87	76.6	75.2	71.6	66.6	67.6	77.8	90.8	70.4	78.8	73.4	71.4	72	69.2	62.6	75	75.4	81.2			1536	66.6	77.2	79.4	74.8	77
1472	0.157645	0.155677			25.0267	24.0232		75.74	76.3979		1472	76.4	66.6	74.8	90.2	78.2	78.2	78.8	79.8	70.6	68	79.8	73.4	86.2	80.4	79.6	71.4	68.2	68.2	79.4	89	73.4	78.8	76.2	68.6	71.4	70.2	61.4	78	76.2	80.8			1472	68	76.6	80.4	75	75.2
1408	0.162096	0.158978			25.7333	24.5325		76.4467	76.9072		1408	76.6	66.8	77.4	90.2	79.6	80.6	78.2	79.4	69.6	72	78.2	74	85.2	84	82.4	70.2	70.2	70.2	81.4	87.2	77	78.8	79	66.8	71.2	71	60.8	79	77	79.4			1408	69.6	76.2	80.8	75.4	74.6
1344	0.166254	0.161877			26.3933	24.9799		77.1067	77.3546		1344	75.8	68.6	80.2	89.6	81.4	82	76.8	78.8	69.4	77.2	76.2	75	85	87.4	84	69	72.8	71.8	83.4	84.4	80.6	79.4	81	65.6	70.8	71.8	60.8	78.8	77.8	77.8			1344	71.8	76.2	81.4	75.4	75.4
1280	0.169235	0.165298			26.8667	25.5077		77.58	77.8825		1280	74.4	71.4	81.6	89.2	81.4	81.8	75.2	78	69	82	74	74.4	87	89.8	84.8	68	75	73.4	84.6	81.6	83.8	80.4	82.2	66	71.8	72.4	62	78.2	78	76			1280	73.4	76.6	82.2	77.2	77.4
1216	0.172301	0.169346			27.3533	26.1325		78.0667	78.5072		1216	73.4	74.6	81.6	89	82.2	80.2	73.8	78	69.2	86.2	73	73.2	90	91.2	85.4	68	76.4	74.8	84.8	79.4	85.6	80.8	82.4	67.4	73.8	73.2	64.6	76.4	77.8	75.6			1216	74	76.8	83.8	80.2	79.6
1152	0.175198	0.175145			27.8133	27.0273		78.5267	79.4021		1152	73	78	80.2	88.8	82	77.6	72.8	78	70.6	89.2	72.4	71.8	94.4	91	86.4	69	77.6	75.6	83.6	77.6	87	80.4	82	69.4	75.4	74.6	68.2	75.2	78.2	75.8			1152	74.6	77.6	86.6	85	82.2
1088	0.179734	0.182414			28.5333	28.149		79.2467	80.5237		1088	73.8	80	78.6	88.6	82	75.6	73	78.8	73.2	91.2	73.2	70.2	98.8	89.8	87.6	71.4	79	77.2	81.4	77.4	87.2	80.4	80.6	72.4	78	76	71.8	74	78.6	77.6			1088	74.4	78	89.6	90	85
1024	0.186495	0.191232			29.6067	29.5098		80.32	81.8845		1024	76.6	81.2	76.8	88	81.8	74.4	74.2	80.4	77	92.2	75.4	68.2	104	87.6	89	74.6	80.2	79.4	79.6	76.6	87	80.2	79.8	76	80.8	78.6	75.6	74	79	81.4			1024	73.4	77.4	94	95.2	87.6
960	0.194936	0.201427			30.9467	31.083		81.66	83.4577		960	80.4	80.6	76.4	86.6	82	74.4	76.6	82.6	82.2	92.8	78.4	66.2	108.2	85.2	91	77.6	81.6	82.4	77.8	76.4	86.6	80.6	79.4	79.8	84	80.8	78.8	75	79.2	86.2			960	72.4	76.8	98.8	99.2	90.8
896	0.206106	0.213466			32.72	32.9407		83.4333	85.3155		896	85.4	79.4	76.8	84.6	82.6	75.8	80.2	86.2	88.4	92.8	82.2	65.8	109.8	84	93	79.8	83	85.6	77.8	76	86.8	82.6	80.4	84.6	87	83.8	80.2	77	79.8	91.6			896	71	76.2	103.8	101.2	94.8
832	0.21883	0.228083			34.74	35.1964		85.4533	87.5711		832	90.8	77.8	78.6	83	83	78.8	85	91	94	92.8	86.4	66.2	110	85	94.8	80.8	84.4	88.2	79	76.8	87.6	86.4	82.6	89.2	89.4	85.6	80	79.6	79.8	97			832	69.6	75.8	109.8	101.6	98.8
768	0.235796	0.247858			37.4333	38.2479		88.1467	90.6227		768	97	77	81.4	83.4	84.2	82.4	90.2	97.2	100.2	92.8	90.4	68.8	109.2	88.4	97.2	79.8	87	90.2	81.6	80.2	89.4	91.6	85.8	94.2	92.4	87.8	79.6	82.8	80.4	101.8			768	69	76	115.8	100.6	103
704	0.2599	0.274688			41.26	42.3881		91.9733	94.7629		704	103.4	78.2	86.4	87	85.8	86.4	95.6	104.4	105.6	94	94.4	73.8	109	94.8	100	79.8	91.6	92	85.8	86.2	92.4	99	90.8	99	95.6	91.6	80	87.2	82.6	106.8			704	70.8	78.6	121.8	99.8	107
640	0.295595	0.312581			46.9267	48.2356		97.64	100.61		640	111.6	82	93.6	94.4	89.2	92	102	113.6	112	97.6	99.4	81	111.6	103.4	105	81.4	97.6	94	92	95.6	97.2	108	96.4	105.4	100.6	96.6	83	93.2	87.2	112.6			640	74.8	84.4	128.2	101.2	112.2
576	0.348087	0.365612			55.26	56.4191		105.973	108.794		576	121	88.6	105.4	105.2	94.2	98.8	110.2	124.4	120.4	104.6	106.2	92	118.2	114	113	87.2	106.4	98	101	108.2	104	118.6	104.4	112.6	108.4	106.2	90.2	101.6	95.8	120.4			576	82.8	94.4	135.6	106.8	117.8
512	0.422626	0.438339			67.0933	67.6418		117.807	120.016		512	133	99.8	120.4	119.4	102	109.4	121.8	137.4	132	114.8	116.4	106	129.6	127	125.8	97.6	118.8	106	113.6	123.4	113.8	131.2	115.4	122.4	120.8	120.6	101.4	115	109	130.4			512	94	109	145	117.8	126
448	0.521228	0.532283			82.7467	82.1387		133.46	134.513		448	148.2	114.8	139.4	135.8	114	124.2	135.6	153.2	147	130	131.6	123.8	145.4	143	143.2	113.6	135	118.4	130.8	140.8	129	147	129	136.4	136.6	139.8	116	132.4	126.4	143.4			448	108.4	128.6	157	134	137.4
384	0.640532	0.645067			101.687	99.5428		152.4	151.918		384	166.2	134.4	159.4	152.6	129.8	144.8	152.6	172.8	164.2	150.6	150.8	144.4	164.4	162	164.8	134	153.8	135	151.8	160	149.2	165.4	145.6	153.4	154.4	161.8	132.8	155	147	159			384	126.4	151.4	173.2	154.2	151.8
320	0.76811	0.767939			121.94	118.504		172.653	170.878		320	185.6	157	178.6	168.8	149.4	169.4	170	192.6	182	173.2	173.8	165.4	183.6	183	187.2	156.6	174.4	153.8	173.8	178	171.8	184.4	162.6	172	173.2	183.4	150	179.4	169.6	177			320	146.2	174.4	191.8	175.4	169.6
256	0.886113	0.883435			140.673	136.326		191.387	188.701		256	204.8	178	194.4	181.8	169.4	195	185	211.4	197	194.6	195.8	185	200.2	202.2	207.2	178	193.4	173.2	194	192.4	193.6	201.8	178.8	188.8	190.6	201.2	164.4	203	190.4	196.2			256	165.4	194.2	210.8	194.4	186.4
192	0.97052	0.968146			154.073	149.398		204.787	201.773		192	217.8	195	204.8	189.4	186	217	194.8	224.6	206.8	207.6	210.8	200.2	211.2	215	220.2	194.4	206.2	189.8	208.2	200	209.2	213.6	190.8	200.8	203	211.6	174	222	206	212.8			192	180.8	206.6	223.8	206.4	198.2
128	1	1			158.753	154.314		209.467	206.689		128	221.6	202.8	208.2	189.6	194.6	228.6	196	229.8	210.8	208.4	213.4	208.4	213.2	216.8	223.8	202	209.2	199.2	212.8	200.2	213.8	217.2	196	204.6	209.4	212.2	177.2	230.8	212	221.4			128	189.8	208.4	225	209.8	201
64	0.961744	0.964806			152.68	148.883		203.393	201.258		64	211.4	201.2	204	181.2	193.4	225.6	186.6	225.8	206.2	195	201.2	206.4	204	205.4	215.6	197.8	199.6	199.2	206.8	191.6	204.6	211.4	193.8	198.8	206.8	202	174	227	206.8	218.6			64	189.4	197.8	213	204.2	193
0	0.859279	0.864061			136.413	133.337		187.127	185.711		0	188.8	188.8	192	165.4	181.4	207	167.6	213.2	193.2	170.6	177.2	193.4	185.4	182.8	197.2	181.8	178.2	188.4	190.8	175.6	184.2	197.6	183.4	183.2	195.2	182.8	164.6	211.2	189.8	203			0	179	177	189.2	190.8	175
-64	0.708101	0.713945			112.413	110.172		163.127	162.546		-64	158.2	168	172.4	145	161.2	176.2	141.8	192.2	172.8	139.8	146.4	170.2	159.2	152.8	171.4	156.6	149.6	167.4	167.2	154.2	155.8	176.6	166.2	159.8	174.6	158.6	149.2	186.6	165.4	178.4			-64	159.4	150	158.6	172.4	151
-128	0.536724	0.542438			85.2067	83.7057		135.92	136.08		-128	126	143	148.8	123.2	137.2	141.2	114.4	166.8	146.6	109	115.2	141.6	130	122.8	142.8	127.4	120.6	140.8	140.8	130.2	125.4	152.2	144	132.4	149.8	132.6	128.4	157.6	138.4	148.4			-128	134.4	121	127.6	150.2	124.8
-192	0.371688	0.377103			59.0067	58.1923		109.72	110.567		-192	98.2	116.8	123	102.8	113.8	107.8	89.6	140.2	118.6	83.4	88.6	112	103.8	96.8	115.2	99	95.8	112.2	115.6	106.4	98.4	127.4	120.8	105.4	123.6	108.8	106	128.6	113	120			-192	108.2	95.2	101	126.6	101
-256	0.234116	0.238385			37.1667	36.7861		87.88	89.1608		-256	76.8	93.6	100	85.6	93.4	81.2	70.8	115.2	93.6	64.8	68.6	87.6	82.8	77.6	91.6	76.8	77.4	88	94.2	85.8	78.6	105.2	99.2	82.6	100.6	89.6	84.4	103	91.6	96.2			-256	85.2	76.2	81.4	103.6	82.4
-320	0.132785	0.135622			21.08	20.9284		71.7933	73.3031		-320	63	76.2	81.6	72.6	78.6	62.6	58.2	94.6	73.8	54.2	55.4	70	69	64.6	74.2	61.6	65.4	69.2	78.6	70.6	65.4	87	80.6	66.8	82	75	66.8	82.4	75.6	78.2			-320	67.6	64.4	68.6	84.2	68.8
-384	0.0660564	0.0671847			10.4867	10.3675		61.2	62.7423		-384	55.2	64.4	68.8	63.4	68.6	51.6	51.2	80	60.2	50.6	47.8	58	60.8	57.8	62.4	52.8	57.6	56.8	67.6	59.8	58	74.2	66.8	57.2	68.4	65	54	66.8	63.4	66.8			-384	56	59	60.2	68.8	60
-448	0.0282199	0.0268732			4.48	4.14691		55.1933	56.5216		-448	51.8	57.8	61.2	57	62.4	46.8	48.2	69.8	52.6	50.8	43.2	51.4	56.6	54	55.4	49.2	53.2	50.2	61	53.8	55.2	66	58.2	53	59.8	58	46.2	57	56	60			-448	49.6	57.8	56.4	57.8	54.4
-512	0.00860874	0.00613627			1.36667	0.946913		52.08	53.3216		-512	51.6	54.2	56	53	59	45.8	46	63.4	49.4	52.2	41.6	47.4	54.8	51.4	51.2	48.4	51.2	48.2	57.2	50.6	54	60.4	54.2	51.8	55	53.8	42	51	51	56.6			-512	45.8	58.6	52.8	50.8	51.8
-576	0.00142779	-0.00327018			0.226667	-0.504634		50.94	51.8701		-576	53.8	52.6	53.4	50.2	57.2	45.6	45.6	60	49.8	54.2	41.2	46	54.4	49.4	49.2	48.8	50.8	48.6	56.2	49.4	54.2	57.2	53	52.4	52.6	51.8	40.2	47.2	47.8	55.4			-576	44.2	60.4	51	46.6	49.8
-640	-0.000461933	-0.0067976			-0.0733333	-1.04896		50.64	51.3258		-640	56.6	52.4	51	48.6	57	46.4	45.2	58.6	51	55	41.8	45.2	54.4	48.2	48	49	50.8	50.6	56.2	48.8	54.4	55	53.4	53.4	51.2	51.6	40.2	44.6	46.2	54.4			-640	43.8	61.6	49.6	45	48.2
-704	-0.000587914	-0.0079734			-0.0933333	-1.23041		50.62	51.1443		-704	59.2	52	49.6	47.2	57	47.4	45	58.2	52	55	43.2	44.8	53.6	46.2	47.8	48.6	51.8	52	56.6	49	54.4	53.2	53.4	54.2	50.2	53.2	41	43.2	45.4	54.2			-704	43.6	62.4	50.2	45.2	47.2
-768	-0.000419939	-0.00777298			-0.0666667	-1.19948		50.6467	51.1753		-768	60.2	51.6	48.6	46.8	57.6	47.6	44.4	59	52.4	55	45.6	45	52.8	43.8	47.8	48.2	53.4	52.8	56.6	49.2	54	52	53	54.6	48.8	55.4	42.4	43	44.6	53.2			-768	44.6	62.4	51.8	46.2	46.2
-832	-0.000503926	-0.00678423			-0.08	-1.0469		50.6333	51.3278		-832	60.2	51.6	48.4	46.6	58	47.8	44.8	59	52.4	55	48.2	45	51.2	41.2	47.8	47	55.4	52.4	56	48.6	53.6	52	51.8	54.8	47.4	57.6	44.2	43.6	44.4	53			-832	46.6	62.6	55.2	47.4	46.2
-896	-0.00130181	-0.00500716			-0.206667	-0.772675		50.5067	51.6021		-896	58.8	51.2	48.6	46.6	58	48.4	44.6	58	52.2	55.8	50.6	45.2	50	39.2	47.6	46.4	57.2	51	55	48	53	52.6	50.4	54.6	45.8	58.8	45.6	44.6	45	52.4			-896	49.2	62.2	59.2	48.6	47.2
-960	-0.00218368	-0.00298959			-0.346667	-0.461335		50.3667	51.9134		-960	56.6	51.2	49	46.6	57.2	48.4	44.6	56.8	51.2	57.2	52.4	45.8	48.2	37.4	47.4	46.6	59.2	49.4	52.8	47.8	52.8	53.8	48.8	54	45	58.8	46.8	46.6	46	52.6			-960	51	62	62.8	49.6	48.6
-1024	-0.00268761	-0.000958648			-0.426667	-0.147933		50.2867	52.2268		-1024	54.4	51.8	50.4	47.2	56	48.6	44.8	54.6	50.6	58.8	53.2	46.2	47.4	37	47.4	47.2	60	47.8	50.8	47.4	52.2	55.4	47.8	52.8	45	57.6	47	48.4	47.6	53.2			-1024	51.8	61.4	65	51.2	50.4
-1088	-0.00235166	0.000150351			-0.373333	0.0232013		50.34	52.3979		-1088	53.8	53.4	51	47.8	55	48.6	45.8	52.8	49.8	60	53	47	46.8	37.4	47.4	47.8	60	47.4	48.6	47.2	52.8	56.6	47.2	51.2	45.4	55.8	46.4	50	49.6	54.6			-1088	51	60	65	52.8	52.4
-1152	-0.00180574	0.000911953			-0.286667	0.140727		50.4267	52.5155		-1152	54.6	54.6	51.4	49.2	53.8	49.2	46.8	51.4	48.8	60.2	51.8	48.6	47.2	38.8	47.8	47.6	59.2	47.4	46.4	46.6	54	57	47.4	49.6	46.4	53.4	45.6	50.4	51.4	56.2			-1152	49	57.8	63.8	53.8	54.2
-1216	-0.00167975	0.00104557			-0.266667	0.161346		50.4467	52.5361		-1216	56.6	55.6	51	50.4	53	49	47.8	51	48.6	59.6	51.2	49.8	48.2	40.6	48.8	46	57.4	48.8	44.8	46.2	54.4	57.2	47.4	47.6	47.2	50.6	44.4	50.4	52.4	57.4			-1216	46.2	55.6	61.4	54	55.4
-1280	-0.000587914	0.00116582			-0.0933333	0.179902		50.62	52.5546		-1280	60.2	56.4	50.4	51.8	52.6	49.4	48.2	52	48	58.4	50.4	51.2	50.6	42.6	49.4	43.8	56.2	50.6	44.4	46.2	55	56.6	47.6	46	48.4	48	43.4	50.4	52.6	57.8			-1280	43.8	53.6	58	54.8	55.8
-1344	0	0.00109901			0	0.169593		50.7133	52.5443		-1344	63.8	56	50.4	52.4	52.8	49.4	48.2	54	47.8	56.6	50.6	52.2	53.2	43.8	50.4	41	54.8	52.2	45.4	46	54.6	56.2	47.8	44.6	48.8	45.2	42.6	50.6	51.8	58.2			-1344	41.2	51.8	55.2	55.2	55.2
-1408	0.000587914	0.000582232			0.0933333	0.0898465		50.8067	52.4646		-1408	67.2	54.8	50.4	53	53.4	50	47.2	56	47.8	55.4	51.4	52.8	55.6	44.6	50.6	38.6	53.2	53.2	47.8	46.2	53	55.2	48	44	50	42.6	42.2	51.2	50.8	58			-1408	40	50.8	53.2	55.4	53.6
-1472	0.00218368	0.000636234			0.346667	0.0981798		51.06	52.4729		-1472	70	52.6	50.8	53.8	56	51	46.8	58.2	47.2	54	53.2	53.4	56.8	45.4	51	37.2	52	53.4	51	46.8	52.2	55	48	43.8	50.8	41.2	42	52	49.4	56.8			-1472	39.6	50.6	51.6	56.2	52
-1536	0.0034435	0.00102775			0.546667	0.158596		51.26	52.5333		-1536	71.4	51.2	50.8	54	59	51.8	46.6	59.4	47.6	53	55.2	54.4	56.4	46	50.2	37.2	51.2	52.8	53.8	47.2	50.4	54.8	48	44.8	52	40	41.8	53	48	55.8			-1536	40.2	51.2	50.6	57.4	50.8
-1600	0.00428337	0.00108175			0.68	0.16693		51.3933	52.5417		-1600	72	49.8	50.2	55.2	62.4	52.8	47	59.2	48.2	52.6	57	55.8	55.2	46.4	48.8	38.4	50.4	51.6	56.2	47	49.2	54.8	48	46	52.8	39.4	41.8	53.4	46.8	53.4			-1600	42	52.8	49.8	58	50.6
-1664	0.00461933	0.000865745			0.733333	0.133596		51.4467	52.5083		-1664	71.4	48.6	49.6	56.2	65.2	53.2	47	57.2	49.4	52.8	58	57	53.4	47.8	47	40.8	50	50.2	57.2	46.6	48.2	55.4	48.6	47.4	53.2	39.8	42	53	46	51.2			-1664	44.6	53.8	49.4	59.2	51.2
-1728	0.00466132	0			0.74	0		51.4533	52.3747		-1728	70.6	47.8	49	57.6	66.6	53.4	47	54.4	50.8	53.8	58.4	58.4	51.8	48.6	45.8	43.4	50.6	48.2	57.8	45.4	48.2	55.8	49.2	48.4	53	42	41.6	51.4	46.2	48.4			-1728	47.6	55.8	49.2		52.6
-1792	0.00428337	-0.00075035			0.68	-0.115789		51.3933	52.2589		-1792	69.4	48.2	49	58.8	66.8	52.8	46	51.6	51.8	55.2	58.6	58.6	51.8	49.2	44.4	45.8	50.6	46.2	57.6	44.8	49.2	56.6	50.2	49.6	51.8	44.6	41.4	49	46	46.2			-1792	50.2	57.6	50		54.8
-1856	0.00398942	-0.00201032			0.633333	-0.310221		51.3467	52.0645		-1856	68.2	49.2	49.4	59.2	65.8	52	44.8	49.6	52.6	56.6	58.4	57.8	52.6	49.6	44.4	47.6	51	44.6	57.6	44.4	50.8	56.6	50.4	50.4	49.6	48	40.8	47	46.6	44.8			-1856	52.6	59.8	51		56.4
-1920	0.0041154	-0.00174554			0.653333	-0.26936		51.3667	52.1054		-1920	66.6	51.6	51	58.8	64	51.4	43.4	48.2	53	57.6	57.6	56.4	54	49	45.2	48.2	51.2	43.8	58	45.8	53.6	56.6	50.2	50.6	47.6	51	40.6	45.2	46.8	44			-1920	54	61.8	52.8		57.8
-1984	0.00377945	0.000346852			0.6	0.053524		51.3133	52.4283		-1984	65.2	54.6	52.8	57.4	62	51	42.6	47.8	52.6	58	57.4	53.2	55.4	47.6	46.2	48.2	50.6	43	59.4	47.8	56	55.6	49.8	50.2	45.6	52.8	40.8	44.8	47.2	43.8			-1984	55.4	63.2	54.8		58.4
-2048	0.00403141	0.00206554			0.64	0.318741		51.3533	52.6935		-2048	62.8	58.2	53.6	55.4	60.2	50.8	42.2	48.2	52.2	56.6	57.4	50	56.4	46.8	48.6	47.4	50.8	42	61.6	50.6	58.6	54.4	49.2	50.4	45	53.6	41.2	45.2	47	44.2			-2048	55.6	63.8	57.2		57.8
-2112	0.00453534	0.00368561			0.72	0.568741		51.4333	52.9435		-2112	60.6	60.2	54	53.6	58.4	51.4	43	49.2	51.2	54.4	58.2	46.6	57.6	46.8	51.2	46.8	51.4	41.4	63.8	52.8	59.6	53.2	48	51.2	45.6	54	41.6	46	47.2	44			-2112	54.2	63.8	58.8		56.2
-2176	0.0047873	0.0049535			0.76	0.764394		51.4733	53.1391		-2176	58.4	61.2	52.8	51.6	58	52.2	44	50.8	50.6	51.6	58.8	43.4	58.2	48	53.6	46.2	53.2	40	65.8	55	59.2	51	47.4	52.2	48.2	53.8	41.8	47	47	43.2			-2176	52.2	62.6	60.2		52.8
-2240	0.00520724	0.00425128			0.826667	0.656032		51.54	53.0308		-2240	55.8	61	50.8	50.6	58.2	53	44.8	51.8	49.8	48.4	59.4	42.2	58	49.8	55.4	46	55.6	39	66.6	56.8	58.4	49.4	46.8	53.2	51.2	54	42.4	47.8	47.8	42.2			-2240	49.2	60.8	59.8		49.4
-2304	0.00533322	0.0031831			0.846667	0.491197		51.56	52.8659		-2304	54	59	49	50.2	59.8	53	44.6	52.2	49.2	45.8	59	42.4	57.2	51.6	56.4	46.6	58.2	38.6	66.6	58.2	57	48.2	46.6	54.2	54.6	54	42.2	48.2	48.4	41.8			-2304	46.6	58.6	58.6		46.2
-2368	0.00541721	0.00168765			0.86	0.260428		51.5733	52.6352		-2368	53	57	47.4	50.8	61.2	52.4	44.2	52.6	48.6	44.6	57.8	43.8	56	53	55.8	46.8	60.8	38.2	65	58.8	55.4	47	47.2	54.4	58.4	54.2	42.4	48	50.2	42.2			-2368	45.2	56.8	57.4		44.4
-2432	0.00533322	-0.000225105			0.846667	-0.0347368		51.56	52.34		-2432	52	54	47	51.4	63.6	50.6	43.4	52.4	48.4	43.6	56	46	53.8	53.4	55.4	46.8	63.4	37.8	63.4	59.2	55	46.4	48.2	54.8	61.4	54.4	42.6	47.2	52	43.2			-2432	44.8	55.4	55		43.6
-2496	0.00562718	-0.00156437			0.893333	-0.241404		51.6067	52.1333		-2496	51.4	52.2	48.4	52.8	64.6	48	42.4	52.2	48	42.8	54	48.4	51.6	53	54.8	46.2	65.4	38.6	61.6	59.4	54.8	47.4	49.2	55.2	63.4	53.8	43.6	45.2	53.8	46			-2496	46	54.6	53		43.8
[truncated: 92 more columns]

## Sheet: Fig 1 Fig Sup 1 D
	With EB1	Without EB1
count	88	85
average	0.0263333	0.0266822
Data	0.0208699	0.0285778
	0.021808	0.0264867
	0.0223922	0.033874
	0.0252522	0.0265431
	0.0206588	0.0326459
	0.0223343	0.0235558
	0.0200945	0.0273073
	0.0346071	0.0252972
	0.0276551	0.0244249
	0.0251819	0.027555
	0.0248221	0.0304253
	0.025779	0.0255629
	0.0376256	0.0338345
	0.0215794	0.0272842
	0.0350152	0.0293306
	0.0276346	0.0208939
	0.0222988	0.019891
	0.0264798	0.0246836
	0.0240653	0.0191984
	0.0307594	0.0236888
	0.0197914	0.0257572
	0.02588	0.0273913
	0.0260068	0.0298738
	0.0225708	0.0254419
	0.0226627	0.0265931
	0.0234444	0.0236661
	0.0240536	0.0309175
	0.0263417	0.0221223
	0.0280865	0.0244066
	0.0254451	0.0302979
	0.0243996	0.0254696
	0.0338179	0.0188284
	0.016237	0.0287284
	0.0208005	0.0186827
	0.0237286	0.0256075
	0.027364	0.0237447
	0.0304695	0.0259795
	0.0336477	0.027456
	0.0223321	0.0301697
	0.0243992	0.0278376
	0.0274241	0.0240312
	0.0349252	0.026074
	0.0382487	0.026492
	0.0270123	0.0277284
	0.0258154	0.0298285
	0.0284308	0.0192263
	0.0224	0.0283993
	0.0235746	0.0206124
	0.0354632	0.0287658
	0.0268687	0.031234
	0.0250022	0.027922
	0.0270857	0.0248805
	0.02555	0.0265883
	0.0224746	0.0300535
	0.0246357	0.0283836
	0.0234016	0.0226165
	0.0305495	0.0255056
	0.0240032	0.0270335
	0.0242226	0.0281599
	0.0287545	0.0330703
	0.0228976	0.027112
	0.0330551	0.0231582
	0.0204907	0.0276247
	0.0235681	0.0294397
	0.0332953	0.0260321
	0.0282505	0.023753
	0.0239379	0.0314517
	0.0303973	0.0316103
	0.0243965	0.0333471
	0.0279479	0.029804
	0.0316476	0.0307072
	0.0353752	0.0304596
	0.027176	0.0287982
	0.023974	0.0259994
	0.0253532	0.0250332
	0.0273676	0.0227415
	0.0233586	0.0227415
	0.0223697	0.0327009
	0.0264519	0.0294878
	0.029008	0.0235902
	0.0262004	0.0224449
	0.0249469	0.027034
	0.0284407	0.0309404
	0.0246694	0.0257836
	0.0289556	0.0195579
	0.0247254
	0.0277212
	0.0271185

## Sheet: Fig 1 Fig Sup1 E
	With EB1	Without EB1
count	88	85
average	87.6671	96.7869
Data	212.147	82.1544
	67.3705	86.9871
	82.682	121.898
	64.7688	79.7027
	80.5466	82.9263
	68.5239	105.961
	89.3843	96.2954
	43.151	64.1969
	88.9528	82.5389
	65.2321	69.6789
	53.3717	106.841
	153.025	97.9829
	57.833	60.6561
	109.578	56.2963
	37.6	168.889
	47	63.0637
	57.4022	63.0637
	105.741	65.3389
	97.7912	65.3389
	94.8278	81.9041
	113.811	127.236
	68.2536	65.4223
	94.9615	87.2241
	56.4119	140.151
	86.7658	65.4039
	64.4929	73.8112
	70.988	147.622
	75.5877	57.0337
	77.4749	71.2921
	66.0246	128.326
	106.853	146.351
	79.4846	80.2572
	64.7796	102.106
	89.2287	129.953
	75.0892	143.886
	135.79	218.215
	78.017	52.503
	44.5796	90.6869
	74.2993	66.822
	104.213	75.9964
	80.3925	116.23
	48.8663	290.81
	44.6202	104.46
	69.9852	127.169
	185.839	119.836
	116.325	55.3088
	160.097	65.2035
	170.947	83.8331
	54.5508	66.1897
	72.5581	60.3787
	49.1478	153.269
	52.2195	69.9342
	56.9532	91.9063
	53.7892	78.1203
	152.81	87.7235
	164.091	83.1065
	85.703	101.575
	111.414	104.546
	78.9818	54.5456
	102.384	117.233
	131.251	84.9807
	51.3592	108.586
	84.9166	80.8431
	86.7218	71.3321
	54.7826	96.523
	57.6659	68.945
	111.288	74.8831
	60.1558	75.5871
	69.9554	47.242
	115.3	61.4146
	47.1863	127.553
	85.7901	129.43
	71.4918	106.318
	79.6911	81.971
	138.132	127.51
	86.8911	103.189
	175.1	140.712
	148.717	117.563
	105.113	54.2598
	84.6218	72.3463
	130.532	155.118
	88.9889	199.44
	53.3934	83.774
	92.9897	65.1576
	80.991	88.8204
	79.7622
	61.5654
	64.6437

## Sheet: Fig 1 Fig Sup 1 F
	Slow Hydro	fast hydro
count	32	32
average	148.995	87.1527
Data	242.852	47.1863
	42.8721	152.81
	183.738	71.4918
	46.0812	43.151
	138.243	78.017
	135.17	94.9615
	42.2405	94.8278
	173.485	115.3
	68.1548	53.3934
	96.5563	57.833
	130.818	53.7892
	104.795	79.7622
	126.371	67.3705
	263.893	115.3
	55.6455	131.251
	133.549	48.8663
	91.3152	69.9554
	161.324	54.5508
	272.6	69.9852
	160.122	43.151
	87.6139	175.1
	254.85	68.2536
	52.2917	160.097
	199.939	152.81
	216.631	94.9615
	272.657	44.5796
	70.6981	105.741
	196.026	80.5466
	273.327	80.5466
	58.6423	105.113
	172.84	97.7912
	242.51	80.3925

## Sheet: Fig 1 Fig Sup 1 G
Position	MonomerAverage background subtracted	Dimer average background subtracted		Monomer average	Dimer average		Monomer Individuals	Position	Monomer run1	Monomer run2	Monomer run3	Monomer run4	Monomer run5	Monomer run6	Monomer run7	Monomer run8	Monomer run9	Monomer run10	Monomer run11	Monomer run12	Monomer run13	Monomer run14	Monomer run15	Monomer run16	Monomer run17	Monomer run18	Monomer run19	Monomer run20	Monomer run21	Monomer run22	Monomer run23	Monomer run24	Monomer run25	Monomer run26	Monomer run27	Monomer run28	Monomer run29	Monomer run30	Monomer run31			dimer Individuals	Position	Dimer Run1	Dimer Run2	Dimer Run3	Dimer Run4	Dimer Run5	Dimer Run6
2496	0.809526	6.10787		51.9647	58.4826			2496	50.4	60.2	58.4	47.2	56.4	57.2	51	40.2	46	58	54.4	53.6	50.8	50.4	45.2	48.4	42.7051	60	51.8	50	61	59.6	51.4	58.4	45	56.2	48.6	52.2	44	54.6	47.6				2496	75.4	50	53	64.2	58.4	41.4
2432	1.19898	6.41462		52.3541	58.7894			2432	50.2	59.8	60	47.8	53.2	58.4	52.2	41.4	46.8	56	54	56.4	48.8	49.8	44.2	46.8	43.3781	63.4	54.8	49.8	60.2	59.4	52.4	59.4	45.8	56.6	49.8	53	45	54.2	50				2432	74.8	49.4	53.6	65	61.4	40.2
2368	1.61114	6.81684		52.7663	59.1916			2368	50.2	58.8	61.6	47.6	50.4	59.4	53	42.8	48.8	54	53.2	58.6	47.6	50.4	43.8	44.8	45.3551	65	57.8	49	59.4	59.4	53.8	59.4	45.8	57.6	51.4	53.4	46.8	54.4	52.2				2368	73.8	48.8	54.2	66.4	62.4	39.6
2304	2.04269	7.38151		53.1978	59.7562			2304	51	57.4	63.8	46.8	49	60.2	53.8	43.8	51.8	51.8	52.6	59.6	47.8	52	43.6	42.4	47.7333	65.4	61.6	48.4	57.6	59.2	54.6	58.6	45.2	58.6	52.4	53.6	48.8	54.8	55.2				2304	73	48.6	54.4	68.8	61.6	40.6
2240	2.44818	8.20235		53.6033	60.5771			2240	52	55.6	65.8	45.2	49.2	60.8	55	44.6	55	50.2	52.6	59.4	48.2	54.2	43.8	39.4	50.7033	64.6	64.6	47.4	55	59.2	55.2	57.4	44.6	60.4	52.8	54	52	55.6	57.2				2240	72.4	48.8	55.2	71.4	60.2	41.8
2176	2.69886	9.16693		53.854	61.5417			2176	52.8	54.2	66.8	43	50.4	60.8	56.6	44.8	58	49.2	52.2	57.8	48.6	55.6	44	37	54.0744	63.8	66.8	46.6	53.2	59.4	54.6	55.8	43.6	61.4	53	54.8	54.6	56.2	59.8				2176	72.2	49.8	56	74.8	58.4	44.2
2112	3.03836	10.2129		54.1935	62.5876			2112	53.6	54.6	67.4	41.2	52.4	60.8	58.4	45.8	59.8	49.6	52.4	55.2	48.8	56.6	44	35.2	57.3991	62.6	68.4	46.8	51.2	59	52.8	54.6	43.2	62.8	52.6	55.8	57.2	57.4	62.4				2112	72.8	52	57.4	77.6	57.6	46.6
2048	3.27573	11.3428		54.4309	63.7175			2048	54.4	55.8	66.8	40	54.2	60.6	59.8	46.4	59.6	50	52.8	53.4	48.4	56.6	44.8	34.6	59.5573	61.8	68.2	47	49.4	58.8	51.8	54	42.8	63	52.4	57.2	59.2	59.2	64.8				2048	74	54.8	58.8	80.4	58.6	49
1984	3.45515	12.4727		54.6103	64.8474			1984	54.2	57.4	64.8	39.4	55.2	60.6	61.8	47.2	59	51	52.6	52	48	55.6	45.8	35	60.3195	61.2	66	48.6	48.2	58.8	50.8	54.4	43	63.2	52.4	58.6	60.4	61.4	66				1984	75.2	59	60	82.2	62.2	51.8
1920	3.7001	13.617		54.8553	65.9918			1920	54.2	59	62.2	39.6	55.8	60.2	63.6	48.2	57.2	51.6	52.6	51.4	48	53.8	47.8	37	60.313	60.6	63.6	50.2	47.8	58.8	51	56.2	43.8	63.4	52.6	58.6	60.8	63.8	66.8				1920	76.4	63.8	61.4	82.8	67.6	54
1856	3.91936	14.7284		55.0745	67.1031			1856	53.8	60.6	59.6	40	55.4	60	65.4	48.4	54.6	51.8	51.6	51.8	48.8	51.8	50.4	39.8	59.31	60.2	61	51.8	49.2	58.8	51.8	58.8	45.4	63	53.6	58.2	59.8	66.2	66.4				1856	77.2	69	63	82.2	74	57.6
1792	4.1531	15.8912		55.3083	68.266			1792	53.2	61.6	57.2	41.6	54.4	59.8	67.4	47.8	51.8	52.6	50.6	52.6	49.4	50.4	53.2	43.2	57.7558	60.2	58.6	53	51.4	58.4	52.8	61.4	47.4	62	55.4	56.8	58.6	68.4	65.6				1792	76.6	73.4	65	80.6	80.4	60.8
1728	4.36581	17.1016		55.521	69.4763			1728	53	61.8	55.8	42.8	53.8	58.8	69	47.4	49.6	53.2	49.6	53.4	49.8	49.2	54.4	46.4	56.75	60.8	57	54.2	54.2	57.8	53.4	64	49.4	60.4	57.8	55	57.2	70.6	64.6				1728	74.6	76.6	67.4	78.2	85.4	63.2
1664	4.54162	18.4562		55.6968	70.8309			1664	52.8	61.2	55.4	44.6	53.4	58.4	70.4	47.6	46.8	54	48.4	53.8	50.4	48.6	55	50.2	55.4001	61.2	56	55.8	56.8	56.6	54.2	66.2	50.4	58	60.6	52.8	55	72.8	63.8				1664	71.8	78.4	70.4	76.2	87.8	65.2
1600	4.81258	19.8129		55.9677	72.1876			1600	52.4	60.2	56	46.4	53.2	58	70.8	49.4	44.4	55.2	48	54.4	50.8	47.8	54.2	53.8	54.3997	61.8	55.6	57	59.6	56.2	55.2	68	51	56.2	62.8	51	53.6	74	63.6				1600	69	79	73.4	74.8	87.2	67
1536	4.92238	21.1098		56.0775	73.4845			1536	51.6	58.8	58	48	52.8	57.2	70.2	52	42.8	55.6	48	55.4	51.4	47.6	52.8	56.8	53.0035	61.6	56	58.2	60.8	55.6	56.8	68.8	50	55.2	64	49.2	52.8	74	63.4				1536	67	78.4	76.2	74.6	84.4	67.6
1472	5.01759	22.3057		56.1727	74.6804			1472	50.8	58.2	60.6	48.8	52	56.4	68.6	54.6	42.4	55.8	48.4	56.2	52.6	47	51.8	58.6	51.955	61.8	56.4	59	61.8	55.6	57.4	69.6	49	55	64.8	48.4	53.2	71.6	63				1472	66.4	78	78	74.6	80.4	68.2
1408	5.17529	23.2583		56.3304	75.633			1408	49.8	58.8	62.6	49	51.6	56	67.2	57.6	43.4	55.2	49.2	56.2	54.6	47.2	50.6	59.4	51.0439	61	56.6	59.2	61.6	56.2	58.2	70.8	48.4	56.4	65	48.4	54	68.8	62.2				1408	66.6	77.2	79.4	74.8	77	68.4
1344	5.23159	24.0232		56.3867	76.3979			1344	48.4	60.2	65.2	48.4	51.4	55.8	65.2	60	45.8	54.2	50	55.6	56.4	48	50.2	59.8	49.9892	60.4	56.4	58.2	61	56.8	57.8	72	47.6	58.4	64.8	49.2	54.4	64.6	61.8				1344	68	76.6	80.4	75	75.2	68.6
1280	5.39187	24.5325		56.547	76.9072			1280	47	62.6	66.6	47.6	51.6	56.6	64	61.6	49.6	53	51	55	58.4	49.6	50.8	59.4	48.9577	59.6	55.6	56.4	60.8	58.4	57.2	73.4	47.2	59.8	64.6	50	54.6	60.6	61.4				1280	69.6	76.2	80.8	75.4	74.6	69
1216	5.55718	24.9799		56.7123	77.3546			1216	45.8	64.4	67.4	47	51.8	57.6	63	63	53.2	52.2	52.2	54.8	59.8	51.8	51.2	58.8	48.2825	59	54.8	55	61	59.4	56	74.2	47	61	64.8	51	54.2	57.8	60.6				1216	71.8	76.2	81.4	75.4	75.4	69
1152	5.9354	25.5077		57.0906	77.8825			1152	45.4	66.2	67.4	47	53	59.4	62	64	56.8	51.6	53.2	55.2	60.8	55	52	57.6	47.8072	59.2	54.6	54.4	63.8	59.8	54.8	74	46.4	62.2	64.2	51.8	54.2	56.2	59.8				1152	73.4	76.6	82.2	77.2	77.4	70.2
1088	6.44456	26.1325		57.5997	78.5072			1088	45.8	67.2	66.2	48.4	54.2	61	61.4	65	59.2	51.8	54.8	56	61	58	52.4	55.6	47.5913	60.4	55	55.2	67.8	60	54.4	73.4	45.6	63.2	63.6	52.6	54.4	55.6	58.8				1088	74	76.8	83.8	80.2	79.6	71.2
1024	7.13628	27.0273		58.2914	79.4021			1024	47	67.8	64.6	50.2	55.6	63.2	61	65.8	59.6	53.2	56.8	57	61.2	61	52.6	52.4	48.2346	62.8	56.2	57.6	72.6	59	55.2	72	44.6	63.8	61.8	53.8	56	56.4	58				1024	74.6	77.6	86.6	85	82.2	71.8
960	7.82178	28.149		58.9769	80.5237			960	48	68.6	62.2	51.2	57.4	65	60.6	66.8	58	55.6	59.4	58.2	61.2	63.4	53	49.4	49.085	65.6	57.6	60.6	76.8	57	56.6	71	42.4	65	59.6	55.4	57.6	57.8	58.2				960	74.4	78	89.6	90	85	72.2
896	8.41292	29.5098		59.5681	81.8845			896	48.6	69.6	60.2	52.4	59.4	66.6	60.4	67	55.4	58.4	62	58.6	61.8	65	53.2	46.6	49.8102	68	59	63.8	79.2	54.8	58.6	69.6	40.8	65.4	57	57.2	59.6	60	58.6				896	73.4	77.4	94	95.2	87.6	72
832	8.9136	31.083		60.0688	83.4577			832	48.8	71.2	59.4	52	60.4	68	60.8	66	52.6	61.6	64.2	58.8	62.8	66.8	53.4	44.6	50.5313	70	60.4	66.4	80	52.6	60.8	68.6	40	64.8	54.8	58.8	61.6	62	59.4				832	72.4	76.8	98.8	99.2	90.8	72.6
768	9.08731	32.9407		60.2425	85.3155			768	48.2	73.6	59	50.6	61.2	68.6	61.6	64.2	49.8	64	65.6	58.6	63.8	68	54.4	44.4	50.9165	70.6	61	68.4	78.4	51.6	62	67.4	39.2	63.8	52.4	59.6	63	64	59.6				768	71	76.2	103.8	101.2	94.8	73.2
704	9.03925	35.1964		60.1944	87.5711			704	47	75.2	59.6	49	61	68.6	62.4	61.6	48.2	66.2	65.6	58.2	63.8	69.2	56.2	45.2	51.8266	69.4	61.6	68.8	75.6	51.2	61.8	66.4	40.8	62.4	51	59	63.4	65.6	60.2				704	69.6	75.8	109.8	101.6	98.8	74
640	8.97005	38.2479		60.1252	90.6227			640	46.2	76.6	61.6	46.8	60.4	69	63.6	59	48.6	66.4	63.4	58.2	63.2	70	58.8	47.2	52.4814	67.2	62.6	68.6	72.6	51.8	60.4	66.4	42.6	61.8	50.4	57.6	63.2	66.8	60.4				640	69	76	115.8	100.6	103	75
576	9.17589	42.3881		60.331	94.7629			576	45.4	77.6	64.6	45.4	60	68.8	65.4	57.2	51	66.2	60.8	58.2	62.6	71.4	61.8	49.6	53.4624	64.4	64.6	67	70.6	52.8	59	67.2	45	62.2	51	55.8	62.8	67	61.4				576	70.8	78.6	121.8	99.8	107	76.4
512	10.0536	48.2356		61.2087	100.61			512	45.2	78.6	68	44.8	59.8	68.8	67.2	56.4	55.8	65	57.6	58.8	63	73.2	64.6	52.4	54.2712	62.4	67.4	66.6	70.6	55.2	57.6	69.4	48	64.2	53.8	54.6	62.6	67.6	64				512	74.8	84.4	128.2	101.2	112.2	79.2
448	12.0881	56.4191		63.2433	108.794			448	46.8	79.2	71.8	45.6	60.8	69.4	70.2	56.8	61.8	63.6	56	60.6	65	76.2	67.8	56	55.1423	62.4	72	67.2	72.8	58.4	58.2	72.6	50.8	68.4	59.4	55.4	64	68.4	67.8				448	82.8	94.4	135.6	106.8	117.8	84.8
384	15.7227	67.6418		66.8778	120.016			384	50	81.2	75.6	48.8	62.4	70.2	74	58.6	69.8	62.6	57.8	64.4	69	80.4	71.4	59.8	57.2131	64.8	78.2	69.6	77.2	63.8	61	77.6	54.6	74	67.6	59.6	68.8	71	72.2				384	94	109	145	117.8	126	94.4
320	21.1742	82.1387		72.3294	134.513			320	55.2	84.6	80.4	54.8	65.4	73.6	79.6	60.8	78	63.2	63	70.2	76	86.4	75.4	65.2	60.4114	70.4	85	74.6	83.2	71	66.2	84.8	60	81.8	77.8	66.6	75.8	75	77.8				320	108.4	128.6	157	134	137.4	108.4
256	28.4488	99.5428		79.604	151.918			256	62.4	89.8	85.6	64.4	70.2	79.2	87.2	64.6	87.6	66.4	71.6	78.2	83.8	95	80.2	72.4	65.3233	78.8	92.2	81.4	90.6	78.8	73.4	94	67	91.2	90	76	85	81.2	84.2				256	126.4	151.4	173.2	154.2	151.8	127.4
192	36.8162	118.504		87.9714	170.878			192	71.8	96.2	91.8	76.4	75.6	87.4	96	69.6	96.8	71.4	82	87	92.6	105.2	86	81.2	72.1124	89.8	99.2	89.4	97.6	87.6	81.4	103.8	75.8	101.2	102	85.8	94.8	88.6	91				192	146.2	174.4	191.8	175.4	169.6	148.8
128	44.9124	136.326		96.0675	188.701			128	81.6	104	97.8	88.6	81.8	96.8	104.2	74.8	105.2	78.2	92.2	95.2	99.6	114.8	92	89.6	79.893	100.6	106.2	96.4	104	95.4	88.2	113	84	110.2	112.4	95.4	103.2	95.2	97.6				128	165.4	194.2	210.8	194.4	186.4	168.6
64	51.0436	149.398		102.199	201.773			64	90.6	110.6	103	98.2	87.6	104.8	110.2	80	110.4	84.2	99.6	101.6	104.4	122.6	96.6	95.8	87.3601	109.2	110.8	101	108.4	100.8	93.6	118.2	89.6	117.4	118.8	102.6	108.4	99.6	102.2				64	180.8	206.6	223.8	206.4	198.2	181.8
0	53.5721	154.314		104.727	206.689			0	96.2	113.8	105.4	101.4	90.8	109	112.8	83.6	111.6	87.8	102.2	105.4	106.6	125.8	97.4	97.8	91.9436	113.8	113.4	101.6	109	102.6	96.8	118.6	90.4	120.2	120.6	106	109	101	104				0	189.8	208.4	225	209.8	201	184.4
-64	51.4104	148.883		102.566	201.258			-64	96.2	112.6	104.2	98.4	90.2	107.6	110.8	83.6	108.6	87.2	99.2	105.2	105.6	122.8	94.6	94.4	91.9335	112.2	111.6	98.2	105.8	99.6	96.2	113.6	85.8	118.2	116.4	104.2	104.4	97.6	102.6				-64	189.4	197.8	213	204.2	193	175.4
-128	45.1617	133.337		96.3168	185.711			-128	91.6	106	99.2	89.8	85.6	100.8	105.4	79.6	102.4	82.8	91.6	101	102.2	113.6	88.6	86.4	87.0221	105.4	106.6	91.4	99.6	92.4	92.4	104.8	77.2	111.2	108	98.2	96	91.2	97.8				-128	179	177	189.2	190.8	175	157.4
-192	36.0809	110.172		87.2361	162.546			-192	83.4	96	90.4	79	79	89.4	96.4	72.8	94.4	74.8	81.2	92.8	96.4	100.4	81.2	76	78.9185	95.2	99	83	92	81.6	85	94.8	66.4	100.6	96.6	88.8	85.4	83.4	90				-192	159.4	150	158.6	172.4	151	133.6
-256	26.117	83.7057		77.2721	136.08			-256	73.6	85	80.6	69.2	71.2	77	86.2	64.2	86.6	65.2	71.2	82.2	88.8	85.8	73	65.8	69.2358	83.8	89.6	73.4	83.6	69.6	75.6	85.6	56.6	89	84.2	77.8	75.2	75.4	81.2				-256	134.4	121	127.6	150.2	124.8	109.6
-320	16.9073	58.1923		68.0624	110.567			-320	64.8	75.4	70.6	61.6	65.2	64.8	76.2	57	79.4	56.4	61.8	71	78.8	71.8	66.4	57.2	60.9354	72.6	80.8	65.4	75	58.4	66.2	77	50	76.8	73.2	68.2	66.8	68.2	72				-320	108.2	95.2	101	126.6	101	87.6
-384	9.65227	36.7861		60.8074	89.1608			-384	58.4	67.6	62.4	57.4	61.2	55.6	67.2	51.4	72.6	49	55.4	62	68.4	61	61.2	51.6	55.0302	63.6	73.2	58	67	50.2	58.4	69.6	46.8	67.2	64.8	61.2	61	62.6	64				-384	85.2	76.2	81.4	103.6	82.4	70.4
-448	4.42613	20.9284		55.5813	73.3031			-448	53.2	62.2	56.4	55.2	58.4	49	59.8	47.8	67	43.8	50.4	56	58.6	53.8	56.6	48.4	51.6199	57.6	67.4	52.6	60.2	45	53.2	63	46.4	59.8	59.6	56.4	56.8	58.6	58.2				-448	67.6	64.4	68.6	84.2	68.8	58.4
-512	1.26135	10.3675		52.4165	62.7423			-512	50.8	58.2	53.2	53.4	57.2	45.6	54	45.2	61.4	41.2	47	52.8	51	50.8	53.6	47.2	49.7115	53.4	63.4	49.2	55	43.2	50.6	58.2	48	55.2	57	53.8	54.4	56.2	55				-512	56	59	60.2	68.8	60	50.8
-576	-0.439223	4.14691		50.7159	56.5216			-576	49.6	56.2	51.8	51.6	56.4	44.6	50	43.6	56.8	40.8	44.8	52.4	46.8	50	50.4	47.2	49.5939	51	61	47.2	51.8	43.2	49.6	54.4	49.2	52	55.8	52.2	53	55.2	54				-576	49.6	57.8	56.4	57.8	54.4	46.6
-640	-0.987755	0.946913		50.1674	53.3216			-640	49.6	55.2	52.2	49.4	56.2	45.6	47	42.8	52.4	41.4	44.2	53.8	45.8	51.4	48.8	48.2	50.1894	49.2	60.2	46.6	50.6	44.2	49.6	52	49.6	50.4	55.8	51.2	52.8	54.4	54.4				-640	45.8	58.6	52.8	50.8	51.8	45
-704	-0.974832	-0.504634		50.1803	51.8701			-704	50	55.4	53.6	46.6	56.2	46.8	44.8	42.6	49.6	42.8	44.4	55.4	47.4	53.6	48.4	49.2	50.99	48	59	46.8	50.6	45	50	50.2	48.6	49.6	56.8	51.8	53	53.4	55				-704	44.2	60.4	51	46.6	49.8	45.2
-768	-0.726019	-1.04896		50.4291	51.3258			-768	50.2	55.6	55.4	44.4	56.4	48	44.6	43.2	47	43.6	45.2	57	50.6	55.4	49.4	49.6	50.9032	47	57.8	48.2	51.4	45.2	49.8	49.4	47.6	49	57.8	52.6	53.4	52	55.6				-768	43.8	61.6	49.6	45	48.2	46.4
-832	-0.387197	-1.23041		50.768	51.1443			-832	50.4	56.4	56.8	42.8	56.8	49	44.4	44.6	45.2	45	46	58.6	54.2	56	51.2	49.8	50.6067	45.6	57	49.6	51.8	44.4	49.4	48.8	46.8	49	58.4	54.4	54.6	50.4	55.8				-832	43.6	62.4	50.2	45.2	47.2	48.8
-896	-0.0678065	-1.19948		51.0873	51.1753			-896	49.8	57	57.4	42.2	56.6	50	45.8	46.2	44.2	46.4	47.2	59.2	57.2	56.2	53.2	49.6	49.1078	44.4	55.6	51	52.4	43.2	48.8	47.8	47.4	50	59.2	56.4	56	48.8	55.4				-896	44.6	62.4	51.8	46.2	46.2	51.6
-960	0.0779032	-1.0469		51.2331	51.3278			-960	49.4	57.6	58.2	42.4	56	50.4	47.8	47.6	43.4	48.4	48.2	58.8	59	55.4	54.8	48.2	47.2248	43.8	53.8	51.4	52.4	41.8	48.4	46.8	49	50.6	59.4	57.6	57.8	48.2	54.4				-960	46.6	62.6	55.2	47.4	46.2	54.4
-1024	0.125974	-0.772675		51.2811	51.6021			-1024	49.6	57.8	58	42.8	54.8	50.8	50	48.2	42.8	50.6	49.2	57.8	59.2	54.6	55.4	45.8	46.115	44	52.6	50.6	52.6	40.2	48.8	45.6	51.6	51.4	59.2	57.2	59.8	49.2	53.4				-1024	49.2	62.2	59.2	48.6	47.2	57
-1088	0.0837806	-0.461335		51.2389	51.9134			-1088	49.8	56.6	58	43.2	53.6	50.4	52.8	48.4	42.2	52	50.2	56.4	58.2	53.8	55.6	43.4	45.407	44.8	51.4	49.4	53.4	38.8	50.6	44.4	54.6	51.4	59.2	55.6	61.6	51.4	51.8				-1088	51	62	62.8	49.6	48.6	57.2
-1152	0	-0.147933		51.1552	52.2268			-1152	49	54.8	57.8	43.2	52.2	50.2	54.8	48	42.2	53.8	50.8	55.6	57	52.4	54.8	40.8	46.0098	46.4	50.6	48.6	54.8	37.6	52.8	43.6	57.4	51	58.4	53.2	62.6	54.6	50.8				-1152	51.8	61.4	65	51.2	50.4	56.2
-1216	-0.0167355	0.0232013		51.1384	52.3979			-1216	47.8	52.2	58	43.6	50.8	49.4	56.2	47.8	42.6	54	52	54	55	51.8	54	39	48.291	47.6	49.6	48.8	57.2	37.6	56.2	43.8	58.8	50.4	57.8	51	62.8	57	50.2				-1216	51	60	65	52.8	52.4	54
-1280	-0.0115355	0.140727		51.1436	52.5155			-1280	45.8	49.2	57.6	43.6	49.6	49.2	56.6	48	43.8	53.4	52.4	53.2	52.6	50.8	53.4	38.8	51.0522	49.4	49	50.6	60.2	38.4	58	45.2	58.4	49.6	56.8	49.6	62.6	58.8	49.8				-1280	49	57.8	63.8	53.8	54.2	51.8
-1344	0.1625	0.161346		51.3177	52.5361			-1344	44	47.2	56.8	43.8	48.8	48	55.6	48.8	46.4	52.2	53.4	51.8	50.4	50.2	54	39.8	54.2473	50.8	48.8	53.8	63	39.4	58.8	47.6	56.4	49.2	56	49	62.4	59.4	50.8				-1344	46.2	55.6	61.4	54	55.4	50
-1408	0.405971	0.179902		51.5611	52.5546			-1408	42	46.2	56.4	44.6	48.4	47	53.6	49.8	49.4	50.2	54.4	51	48.8	49.8	55.4	42	57.9949	52.2	49.2	57.6	65.8	40.6	58	50.4	52.6	49	55.4	49.2	61	58.8	51.6				-1408	43.8	53.6	58	54.8	55.8	49.8
-1472	0.586435	0.169593		51.7416	52.5443			-1472	41.4	47	55.8	45.6	48	46	51	50.8	52.6	48	55.2	50	47.4	50.4	57.2	44	60.3893	53.4	51.2	60.4	67.8	41.6	55.8	52.8	48.8	48.6	55	49	59.2	57.2	52.4				-1472	41.2	51.8	55.2	55.2	55.2	50.8
-1536	0.794939	0.0898465		51.9501	52.4646			-1536	41.2	49.6	55.2	46.8	47.8	45.4	47.8	50.6	55	45.8	55.8	49.2	47.2	51.4	58.6	46.2	62.0529	54.6	53.8	61.2	69.4	42.6	53.4	54.6	46	48.8	55.8	48.8	57.6	55	53.2				-1536	40	50.8	53.2	55.4	53.6	52.2
-1600	0.801023	0.0981798		51.9562	52.4729			-1600	42.2	52.6	54	46.8	47.2	45.6	45	50.2	56.6	45	55	48.4	47.4	52.2	59.2	47.2	62.4415	54.8	57.2	60.8	69.8	44	52.2	55.8	44.2	48.2	56	48.4	55.6	52.6	54				-1600	39.6	50.6	51.6	56.2	52	54.2
-1664	0.673361	0.158596		51.8285	52.5333			-1664	43.6	55.6	52.8	47.4	47	47.2	43.4	49	56.6	45.4	53.2	47.8	47.8	53	59	47.6	62.084	55.4	59.6	58.6	68.8	45	50.8	55.6	43.4	47	56.4	48	54.2	50.8	54.6				-1664	40.2	51.2	50.6	57.4	50.8	55.8
-1728	0.451726	0.16693		51.6069	52.5417			-1728	45.2	58.2	51.2	47.2	46.2	49.2	42.8	47.4	54.4	46.8	50.8	48.2	48.6	53.8	57.6	47	60.6133	55.8	61	56	66.4	46	51	55.4	43.8	45.4	56.6	48	54.2	49.8	55.2				-1728	42	52.8	49.8	58	50.6	57.2
-1792	0.133184	0.133596		51.2883	52.5083			-1792	46.6	59.8	49.8	46.6	46	51.2	43.2	45.6	51.4	48.4	48.6	49	49	53.6	55.8	46.2	58.9385	56.2	60.4	54.2	64.2	46.2	51.4	54.6	45	43.8	55.6	48.8	55.4	49	55.4				-1792	44.6	53.8	49.4	59.2	51.2	57.8
-1856	-0.204532	0		50.9506	52.3747			-1856	48.4	59.4	49.2	46.4	45.6	53.2	43.2	45.2	47	50	47	50.8	48.8	53.6	52.8	45	57.2693	56.2	59	53.4	61.6	45.8	52.6	53.2	45.8	42.4	54.4	49.8	57.8	49.6	55				-1856	47.6	55.8	49.2		52.6	58.2
-1920	-0.522894	-0.115789		50.6323	52.2589			-1920	49	57.6	49	45.8	45.6	54.2	43.4	45.4	43.6	50.2	47	53.2	48.4	52.6	50	44.2	56.4001	55	57.2	54.2	59.6	45.4	54.2	52.4	46.4	42.2	52.4	49.8	60	51	54.2				-1920	50.2	57.6	50		54.8	58.6
-1984	-0.763739	-0.310221		50.3914	52.0645			-1984	49.6	54.4	48.6	46	46.2	54.2	42.6	46.4	41	50.2	48.2	55.8	47.4	51.6	47.4	43.6	56.5339	53	56	56	58.6	44.8	55.8	51.6	46	43	50.2	49	62.2	52.6	53.6				-1984	52.6	59.8	51		56.4	58.4
-2048	-0.845381	-0.26936		50.3098	52.1054			-2048	49.6	51.2	49	46.2	46.8	54	41.4	48.2	39.8	49.8	50.2	57.8	46.2	50.4	45.8	44	57.603	49.8	55.6	58.2	57.8	44.2	57.2	50.4	46	44.8	48.6	47.2	64	55	52.8				-2048	54	61.8	52.8		57.8	58.8
-2112	-0.795668	0.053524		50.3595	52.4283			-2112	49.2	48.8	49	46.4	47.8	53	40.6	49.8	39.4	49.4	52.6	58.8	46	50.4	45.4	45.2	58.9441	47	55.4	59.6	56.6	44.6	57.2	50	45.6	47	47.4	45.8	64.2	57	53				-2112	55.4	63.2	54.8		58.4	59
-2176	-0.618835	0.318741		50.5363	52.6935			-2176	48.4	46.8	48.4	47.2	48.8	52.8	40.8	51.6	39	49.6	54.8	58.6	46.2	51.2	45.6	46.8	60.2259	44.8	55	59.8	55.4	46.4	56.8	50	46	49.4	46.8	44	63.8	58.6	53				-2176	55.6	63.8	57.2		57.8	59.6
-2240	-0.371245	0.568741		50.7839	52.9435			-2240	47.6	47.2	48.2	47.6	48.6	52.6	41.2	52.6	39	50.2	56.4	57.4	47	53	47.8	49.6	60.3012	43.8	54.4	58.8	54.2	48.4	55.8	50	46.8	51.2	46.4	43.4	62.6	59.2	53				-2240	54.2	63.8	58.8		56.2	60.4
-2304	-0.115494	0.764394		51.0397	53.1391			-2304	46.4	47.6	48	48.6	48.4	51.8	42.8	53.2	38.8	51	57	56.2	48.8	54.4	50.2	52.4	59.0295	44	53.8	57.4	52.6	50.6	55.2	50.2	47.8	52.4	47.2	43.6	60.8	59	53				-2304	52.2	62.6	60.2		52.8	61.4
-2368	0.0127	0.656032		51.1679	53.0308			-2368	45.4	48.4	48.2	49.4	47.6	50.8	44.6	52.8	38.4	51.6	57	55	50.4	55.6	52.2	54.8	56.8035	45.6	52.6	55.4	51.2	52.2	54.2	50.6	49.2	53.4	48.6	43.6	59.6	58.4	52.6				-2368	49.2	60.8	59.8		49.4	62.2
-2432	-0.0417161	0.491197		51.1134	52.8659			-2432	44.6	49	48.6	49.6	46	49.2	45.6	52.8	38.8	52.6	56.2	54.2	51.8	55.2	54.2	57.2	53.5166	47.2	51.2	53.6	49.6	52.8	54.6	51.8	50.6	53.6	49.8	43.8	57.8	57.2	51.8				-2432	46.6	58.6	58.6		46.2	62.4
-2496	-0.120423	0.260428		51.0347	52.6352			-2496	43.6	49.6	49.4	49.2	45	46.8	47.2	51.6	39.6	53.2	54.6	53.2	52.8	54.4	56	58.4	50.4767	49.2	50	53	48.8	52	54.8	53.8	52	54	51.2	44.6	56.8	56.2	50.6				-2496	45.2	56.8	57.4		44.4	62.4
[truncated: 91 more columns]

## Sheet: Fig 1 Fig Sup 1 H
	GTP Edge	GTP Lattice
count	70	70
average	0.354653	0.645347
Data	0.340323	0.659677
	0.399355	0.600645
	0.379999	0.620001
	0.284894	0.715106
	0.374603	0.625397
	0.396972	0.603028
	0.336062	0.663938
	0.334912	0.665088
	0.323867	0.676133
	0.316886	0.683114
	0.402988	0.597012
	0.355093	0.644907
	0.326276	0.673724
	0.367183	0.632817
	0.347685	0.652315
	0.399827	0.600173
	0.41023	0.58977
	0.416498	0.583502
	0.358345	0.641655
	0.417869	0.582131
	0.331645	0.668355
	0.365124	0.634876
	0.369631	0.630369
	0.348761	0.651239
	0.369579	0.630421
	0.433126	0.566874
	0.392302	0.607698
	0.383106	0.616894
	0.333264	0.666736
	0.338671	0.661329
	0.317952	0.682048
	0.345579	0.654421
	0.344102	0.655898
	0.306088	0.693912
	0.317123	0.682877
	0.318473	0.681527
	0.352687	0.647313
	0.304748	0.695252
	0.338027	0.661973
	0.391766	0.608234
	0.332344	0.667656
	0.315701	0.684299
	0.367857	0.632143
	0.363069	0.636931
	0.395011	0.604989
	0.359869	0.640131
	0.325981	0.674019
	0.345155	0.654845
	0.344436	0.655564
	0.338918	0.661082
	0.358147	0.641853
	0.330246	0.669754
	0.307317	0.692683
	0.363432	0.636568
	0.310076	0.689924
	0.353029	0.646971
	0.379458	0.620542
	0.327439	0.672561
	0.348398	0.651602
	0.362203	0.637797
	0.380171	0.619829
	0.324004	0.675996
	0.360923	0.639077
	0.360352	0.639648
	0.309232	0.690768
	0.342533	0.657467
	0.372234	0.627766
	0.335662	0.664338
	0.404186	0.595814
	0.416701	0.583299

## Sheet: Fig1 Fig Supp 1 I
	GTP Edge rep 1	GTP Edge rep 2	GTP Edge rep 3	GTP Edge rep 4	GTP Edge rep 5	GTP Lat Rep1	GTP Lat Rep2	GTP Lat Rep3	GTP Lat Rep4	GTP Lat Rep5			global average	std error
count	450	450	450	450	450	450	450	450	450	450		GTP edge	0.500455	0.0197756
average	0.578617	0.482965	0.48819	0.444318	0.508186	0.421383	0.517035	0.51181	0.555682	0.491814		GTP lattice	0.499545	0.0197756
Data	1	0.909091	0.977778	1	0.982456	0	0.0909091	0.0222222	0	0.0175439
	0.966667	0.902439	0.939024	1	0.987805	0.0333333	0.097561	0.0609756	0	0.0121951
	0.915789	0.888889	0.916667	0.972222	0.990741	0.0842105	0.111111	0.0833333	0.0277778	0.00925926
	0.87931	0.856	0.92	0.944	0.968504	0.12069	0.144	0.08	0.056	0.0314961
	0.880597	0.846154	0.846154	0.93007	0.944056	0.119403	0.153846	0.153846	0.0699301	0.0559441
	0.828358	0.810219	0.806667	0.926667	0.906667	0.171642	0.189781	0.193333	0.0733333	0.0933333
	0.858896	0.797546	0.852761	0.877301	0.895706	0.141104	0.202454	0.147239	0.122699	0.104294
	0.826667	0.80117	0.818713	0.853801	0.871345	0.173333	0.19883	0.181287	0.146199	0.128655
	0.833333	0.752874	0.793103	0.804598	0.827586	0.166667	0.247126	0.206897	0.195402	0.172414
	0.835294	0.748718	0.774359	0.789744	0.841026	0.164706	0.251282	0.225641	0.210256	0.158974
	0.809524	0.76	0.78	0.79	0.82	0.190476	0.24	0.22	0.21	0.18
	0.785714	0.739336	0.744076	0.800948	0.796209	0.214286	0.260664	0.255924	0.199052	0.203791
	0.740741	0.776786	0.727679	0.8125	0.78125	0.259259	0.223214	0.272321	0.1875	0.21875
	0.682432	0.778802	0.682028	0.834101	0.78341	0.317568	0.221198	0.317972	0.165899	0.21659
	0.694444	0.731132	0.650943	0.806604	0.754717	0.305556	0.268868	0.349057	0.193396	0.245283
	0.589928	0.716279	0.665116	0.748837	0.762791	0.410072	0.283721	0.334884	0.251163	0.237209
	0.652695	0.684685	0.68018	0.765766	0.747748	0.347305	0.315315	0.31982	0.234234	0.252252
	0.660377	0.665116	0.627907	0.744186	0.72093	0.339623	0.334884	0.372093	0.255814	0.27907
	0.642857	0.677419	0.589862	0.728111	0.774194	0.357143	0.322581	0.410138	0.271889	0.225806
	0.683616	0.59	0.627358	0.754717	0.726027	0.316384	0.41	0.372642	0.245283	0.273973
	0.696335	0.616915	0.64878	0.760976	0.692683	0.303665	0.383085	0.35122	0.239024	0.307317
	0.708738	0.606796	0.666667	0.784038	0.661972	0.291262	0.393204	0.333333	0.215962	0.338028
	0.69863	0.575342	0.675799	0.757991	0.69863	0.30137	0.424658	0.324201	0.242009	0.30137
	0.711207	0.594828	0.672414	0.741379	0.693966	0.288793	0.405172	0.327586	0.258621	0.306034
	0.661972	0.601626	0.634146	0.674797	0.686992	0.338028	0.398374	0.365854	0.325203	0.313008
	0.685714	0.657143	0.677551	0.714286	0.714286	0.314286	0.342857	0.322449	0.285714	0.285714
	0.64532	0.591928	0.613821	0.589431	0.678862	0.35468	0.408072	0.386179	0.410569	0.321138
	0.630841	0.579439	0.580247	0.576132	0.650206	0.369159	0.420561	0.419753	0.423868	0.349794
	0.655022	0.572052	0.58952	0.633188	0.642553	0.344978	0.427948	0.41048	0.366812	0.357447
	0.660099	0.525581	0.573333	0.662222	0.586667	0.339901	0.474419	0.426667	0.337778	0.413333
	0.642534	0.533632	0.616601	0.73913	0.596838	0.357466	0.466368	0.383399	0.26087	0.403162
	0.669725	0.535865	0.61753	0.701195	0.59761	0.330275	0.464135	0.38247	0.298805	0.40239
	0.668161	0.559184	0.571429	0.741313	0.563707	0.331839	0.440816	0.428571	0.258687	0.436293
	0.635983	0.585774	0.593284	0.746269	0.608209	0.364017	0.414226	0.406716	0.253731	0.391791
	0.630435	0.591304	0.570934	0.688581	0.581315	0.369565	0.408696	0.429066	0.311419	0.418685
	0.623256	0.581897	0.520979	0.590909	0.531469	0.376744	0.418103	0.479021	0.409091	0.468531
	0.602564	0.527132	0.526132	0.557491	0.585366	0.397436	0.472868	0.473868	0.442509	0.414634
	0.600806	0.53629	0.496622	0.560811	0.550676	0.399194	0.46371	0.503378	0.439189	0.449324
	0.594796	0.565056	0.531034	0.593103	0.62069	0.405204	0.434944	0.468966	0.406897	0.37931
	0.615686	0.541176	0.562069	0.624138	0.624138	0.384314	0.458824	0.437931	0.375862	0.375862
	0.635417	0.5625	0.559028	0.611111	0.572917	0.364583	0.4375	0.440972	0.388889	0.427083
	0.684385	0.574751	0.571429	0.574751	0.574751	0.315615	0.425249	0.428571	0.425249	0.425249
	0.634058	0.59058	0.550523	0.554007	0.529617	0.365942	0.40942	0.449477	0.445993	0.470383
	0.639706	0.643382	0.533808	0.533808	0.537367	0.360294	0.356618	0.466192	0.466192	0.462633
	0.616236	0.608856	0.533333	0.613333	0.54	0.383764	0.391144	0.466667	0.386667	0.46
	0.607407	0.62963	0.520635	0.628571	0.549206	0.392593	0.37037	0.479365	0.371429	0.450794
	0.618421	0.641447	0.496795	0.612179	0.535256	0.381579	0.358553	0.503205	0.387821	0.464744
	0.58804	0.644518	0.481728	0.654485	0.554817	0.41196	0.355482	0.518272	0.345515	0.445183
	0.613208	0.698113	0.531447	0.685535	0.597484	0.386792	0.301887	0.468553	0.314465	0.402516
	0.612583	0.741722	0.52649	0.665563	0.619205	0.387417	0.258278	0.47351	0.334437	0.380795
	0.538776	0.742857	0.436	0.628	0.588235	0.461224	0.257143	0.564	0.372	0.411765
	0.552239	0.768657	0.473881	0.660448	0.605735	0.447761	0.231343	0.526119	0.339552	0.394265
	0.545082	0.807377	0.413934	0.651639	0.627306	0.454918	0.192623	0.586066	0.348361	0.372694
	0.505929	0.758893	0.425197	0.665354	0.57874	0.494071	0.241107	0.574803	0.334646	0.42126
	0.49004	0.772908	0.404669	0.564202	0.533074	0.50996	0.227092	0.595331	0.435798	0.466926
	0.535849	0.788679	0.362264	0.449057	0.566038	0.464151	0.211321	0.637736	0.550943	0.433962
	0.516729	0.72119	0.39777	0.479554	0.57047	0.483271	0.27881	0.60223	0.520446	0.42953
	0.483019	0.74717	0.431159	0.449275	0.566553	0.516981	0.25283	0.568841	0.550725	0.433447
	0.480969	0.712803	0.387543	0.487889	0.554422	0.519031	0.287197	0.612457	0.512111	0.445578
	0.527211	0.731293	0.486395	0.670068	0.574257	0.472789	0.268707	0.513605	0.329932	0.425743
	0.450758	0.621212	0.469697	0.685606	0.61204	0.549242	0.378788	0.530303	0.314394	0.38796
	0.486989	0.60223	0.401487	0.643123	0.627907	0.513011	0.39777	0.598513	0.356877	0.372093
	0.489362	0.553191	0.404255	0.638298	0.61794	0.510638	0.446809	0.595745	0.361702	0.38206
	0.519231	0.569231	0.448399	0.736655	0.657807	0.480769	0.430769	0.551601	0.263345	0.342193
	0.484962	0.575188	0.456081	0.72973	0.591216	0.515038	0.424812	0.543919	0.27027	0.408784
	0.511785	0.626263	0.501684	0.777778	0.572391	0.488215	0.373737	0.498316	0.222222	0.427609
	0.52027	0.658784	0.485246	0.77377	0.563934	0.47973	0.341216	0.514754	0.22623	0.436066
	0.542208	0.701299	0.444805	0.743506	0.558442	0.457792	0.298701	0.555195	0.256494	0.441558
	0.558065	0.677419	0.464516	0.751613	0.519355	0.441935	0.322581	0.535484	0.248387	0.480645
	0.556231	0.717325	0.43769	0.729483	0.553191	0.443769	0.282675	0.56231	0.270517	0.446809
	0.551515	0.751515	0.475758	0.69697	0.569697	0.448485	0.248485	0.524242	0.30303	0.430303
	0.565982	0.753666	0.498534	0.651026	0.536657	0.434018	0.246334	0.501466	0.348974	0.463343
	0.542424	0.739394	0.475758	0.645455	0.554545	0.457576	0.260606	0.524242	0.354545	0.445455
	0.530792	0.715543	0.463343	0.671554	0.533724	0.469208	0.284457	0.536657	0.328446	0.466276
	0.533333	0.751515	0.469697	0.724242	0.524242	0.466667	0.248485	0.530303	0.275758	0.475758
	0.543807	0.752266	0.471299	0.734139	0.558912	0.456193	0.247734	0.528701	0.265861	0.441088
	0.474627	0.659701	0.364179	0.716418	0.522388	0.525373	0.340299	0.635821	0.283582	0.477612
	0.501538	0.661538	0.36	0.655385	0.489231	0.498462	0.338462	0.64	0.344615	0.510769
	0.44586	0.665605	0.382166	0.595541	0.512739	0.55414	0.334395	0.617834	0.404459	0.487261
	0.426966	0.692884	0.363296	0.629213	0.547038	0.573034	0.307116	0.636704	0.370787	0.452962
	0.473684	0.548872	0.368421	0.639098	0.421053	0.526316	0.451128	0.631579	0.360902	0.578947
	0.478102	0.525547	0.39781	0.645985	0.430657	0.521898	0.474453	0.60219	0.354015	0.569343
	0.474227	0.491409	0.395189	0.584192	0.415808	0.525773	0.508591	0.604811	0.415808	0.584192
	0.456592	0.495177	0.430868	0.588424	0.453376	0.543408	0.504823	0.569132	0.411576	0.546624
	0.474522	0.566879	0.429936	0.611465	0.474522	0.525478	0.433121	0.570064	0.388535	0.525478
	0.461279	0.575758	0.427609	0.670034	0.469799	0.538721	0.424242	0.572391	0.329966	0.530201
	0.432692	0.544872	0.387821	0.608974	0.407051	0.567308	0.455128	0.612179	0.391026	0.592949
	0.459627	0.571429	0.409938	0.537267	0.475155	0.540373	0.428571	0.590062	0.462733	0.524845
	0.461988	0.576023	0.380117	0.54386	0.377193	0.538012	0.423977	0.619883	0.45614	0.622807
	0.458791	0.590659	0.406593	0.552198	0.39011	0.541209	0.409341	0.593407	0.447802	0.60989
	0.425076	0.605505	0.406728	0.571865	0.391437	0.574924	0.394495	0.593272	0.428135	0.608563
	0.470769	0.707692	0.390769	0.529231	0.430769	0.529231	0.292308	0.609231	0.470769	0.569231
	0.473016	0.733333	0.428571	0.587302	0.48254	0.526984	0.266667	0.571429	0.412698	0.51746
	0.409722	0.677083	0.447917	0.59375	0.475694	0.590278	0.322917	0.552083	0.40625	0.524306
	0.425325	0.659091	0.457792	0.574675	0.519481	0.574675	0.340909	0.542208	0.425325	0.480519
	0.447183	0.672535	0.422535	0.573944	0.503521	0.552817	0.327465	0.577465	0.426056	0.496479
	0.472028	0.70979	0.423077	0.562937	0.451827	0.527972	0.29021	0.576923	0.437063	0.548173
	0.49375	0.671875	0.434375	0.553125	0.440625	0.50625	0.328125	0.565625	0.446875	0.559375
	0.462069	0.672414	0.472414	0.606897	0.410345	0.537931	0.327586	0.527586	0.393103	0.589655
	0.465986	0.673469	0.42517	0.537415	0.438776	0.534014	0.326531	0.57483	0.462585	0.561224
	0.442997	0.680782	0.420195	0.576547	0.439739	0.557003	0.319218	0.579805	0.423453	0.560261
	0.452012	0.637771	0.433437	0.563467	0.359133	0.547988	0.362229	0.566563	0.436533	0.640867
	0.477341	0.616314	0.462236	0.574018	0.462236	0.522659	0.383686	0.537764	0.425982	0.537764
	0.44152	0.581871	0.412281	0.523392	0.388889	0.55848	0.418129	0.587719	0.476608	0.611111
	0.40566	0.591195	0.386792	0.559748	0.393082	0.59434	0.408805	0.613208	0.440252	0.606918
	0.417957	0.597523	0.433437	0.566563	0.393189	0.582043	0.402477	0.566563	0.433437	0.606811
	0.424332	0.635015	0.436202	0.578635	0.454006	0.575668	0.364985	0.563798	0.421365	0.545994
	0.389535	0.630814	0.424419	0.56686	0.456395	0.610465	0.369186	0.575581	0.43314	0.543605
	0.435673	0.593567	0.438596	0.561404	0.48538	0.564327	0.406433	0.561404	0.438596	0.51462
	0.437673	0.468144	0.426593	0.573407	0.476454	0.562327	0.531856	0.573407	0.426593	0.523546
	0.424501	0.438746	0.410256	0.589744	0.487179	0.575499	0.561254	0.589744	0.410256	0.512821
	0.411043	0.45092	0.457055	0.57362	0.5	0.588957	0.54908	0.542945	0.42638	0.5
	0.396774	0.416129	0.450311	0.60559	0.503106	0.603226	0.583871	0.549689	0.39441	0.496894
	0.38961	0.412338	0.481818	0.566667	0.445455	0.61039	0.587662	0.518182	0.433333	0.554545
	0.349359	0.435897	0.481132	0.534591	0.446541	0.650641	0.564103	0.518868	0.465409	0.553459
	0.375	0.5	0.454268	0.496951	0.429878	0.625	0.5	0.545732	0.503049	0.570122
	0.412104	0.56196	0.469741	0.498559	0.507205	0.587896	0.43804	0.530259	0.501441	0.492795
	0.354286	0.528571	0.44	0.491429	0.528571	0.645714	0.471429	0.56	0.508571	0.471429
	0.333333	0.508065	0.432796	0.5	0.524194	0.666667	0.491935	0.567204	0.5	0.475806
	0.365169	0.575843	0.462162	0.518919	0.459459	0.634831	0.424157	0.537838	0.481081	0.540541
	0.389831	0.579096	0.462963	0.462963	0.378307	0.610169	0.420904	0.537037	0.537037	0.621693
	0.444759	0.563739	0.407932	0.439093	0.334278	0.555241	0.436261	0.592068	0.560907	0.665722
	0.464396	0.609907	0.467606	0.509859	0.450704	0.535604	0.390093	0.532394	0.490141	0.549296
	0.456395	0.636628	0.44186	0.485465	0.468023	0.543605	0.363372	0.55814	0.514535	0.531977
	0.451327	0.643068	0.460177	0.448378	0.463127	0.548673	0.356932	0.539823	0.551622	0.536873
	0.492877	0.683761	0.447293	0.421652	0.438746	0.507123	0.316239	0.552707	0.578348	0.561254
	0.514986	0.713896	0.414169	0.47139	0.506812	0.485014	0.286104	0.585831	0.52861	0.493188
	0.504043	0.657682	0.385445	0.48248	0.552561	0.495957	0.342318	0.614555	0.51752	0.447439
	0.488189	0.606299	0.362205	0.506562	0.622047	0.511811	0.393701	0.637795	0.493438	0.377953
	0.488312	0.561039	0.332468	0.506494	0.638961	0.511688	0.438961	0.667532	0.493506	0.361039
	0.460733	0.526178	0.324607	0.518325	0.651832	0.539267	0.473822	0.675393	0.481675	0.348168
	0.490521	0.566351	0.395735	0.554502	0.694313	0.509479	0.433649	0.604265	0.445498	0.305687
	0.484185	0.56691	0.43309	0.53528	0.678832	0.515815	0.43309	0.56691	0.46472	0.321168
	0.490566	0.596698	0.429245	0.521226	0.662736	0.509434	0.403302	0.570755	0.478774	0.337264
	0.501155	0.586605	0.406467	0.494226	0.614319	0.498845	0.413395	0.593533	0.505774	0.385681
	0.501149	0.574713	0.377011	0.445977	0.588506	0.498851	0.425287	0.622989	0.554023	0.411494
	0.429799	0.492837	0.418338	0.489971	0.558739	0.570201	0.507163	0.581662	0.510029	0.441261
	0.419453	0.455927	0.412281	0.438596	0.526316	0.580547	0.544073	0.587719	0.561404	0.473684
	0.364706	0.408824	0.388235	0.408824	0.570588	0.635294	0.591176	0.611765	0.591176	0.429412
	0.400585	0.48538	0.386111	0.397222	0.516667	0.599415	0.51462	0.613889	0.602778	0.483333
	0.362573	0.5	0.362573	0.403509	0.555556	0.637427	0.5	0.637427	0.596491	0.444444
	0.313665	0.444099	0.332298	0.400621	0.521739	0.686335	0.555901	0.667702	0.599379	0.478261
	0.28125	0.428125	0.34375	0.40625	0.584375	0.71875	0.571875	0.65625	0.59375	0.415625
	0.273585	0.421384	0.333333	0.40566	0.537736	0.726415	0.578616	0.666667	0.59434	0.462264
	0.313665	0.484472	0.335385	0.421538	0.6	0.686335	0.515528	0.664615	0.578462	0.4
	0.315436	0.489933	0.332326	0.413897	0.58006	0.684564	0.510067	0.667674	0.586103	0.41994
	0.332237	0.523026	0.356287	0.464072	0.598802	0.667763	0.476974	0.643713	0.535928	0.401198
	0.340426	0.553191	0.368876	0.426513	0.576369	0.659574	0.446809	0.631124	0.573487	0.423631
	0.324159	0.562691	0.402985	0.423881	0.543284	0.675841	0.437309	0.597015	0.576119	0.456716
	0.381657	0.585799	0.392045	0.431818	0.553977	0.618343	0.414201	0.607955	0.568182	0.446023
	0.364458	0.551205	0.394366	0.428169	0.546479	0.635542	0.448795	0.605634	0.571831	0.453521
	0.289157	0.521084	0.39782	0.40327	0.517711	0.710843	0.478916	0.60218	0.59673	0.482289
	0.337621	0.450161	0.408964	0.414566	0.551821	0.662379	0.549839	0.591036	0.585434	0.448179
	0.353293	0.479042	0.281437	0.377246	0.494012	0.646707	0.520958	0.718563	0.622754	0.505988
	0.366667	0.512821	0.297436	0.428205	0.535897	0.633333	0.487179	0.702564	0.571795	0.464103
	0.387812	0.509695	0.304709	0.462604	0.526316	0.612188	0.490305	0.695291	0.537396	0.473684
	0.407514	0.508671	0.283237	0.485549	0.572254	0.592486	0.491329	0.716763	0.514451	0.427746
	0.372928	0.480663	0.334254	0.466851	0.549724	0.627072	0.519337	0.665746	0.533149	0.450276
	0.373961	0.512465	0.423823	0.473684	0.595568	0.626039	0.487535	0.576177	0.526316	0.404432
	0.363868	0.498728	0.463104	0.493639	0.597964	0.636132	0.501272	0.536896	0.506361	0.402036
	0.398964	0.5	0.497409	0.453368	0.57772	0.601036	0.5	0.502591	0.546632	0.42228
	0.387863	0.498681	0.496042	0.440633	0.596306	0.612137	0.501319	0.503958	0.559367	0.403694
	0.388451	0.435696	0.456693	0.459318	0.643045	0.611549	0.564304	0.543307	0.540682	0.356955
	0.396226	0.436658	0.498652	0.490566	0.657682	0.603774	0.563342	0.501348	0.509434	0.342318
	0.388601	0.445596	0.531088	0.515544	0.629534	0.611399	0.554404	0.468912	0.484456	0.370466
	0.376847	0.438424	0.53202	0.470443	0.578818	0.623153	0.561576	0.46798	0.529557	0.421182
	0.340909	0.444444	0.537879	0.5	0.593434	0.659091	0.555556	0.462121	0.5	0.406566
	0.342618	0.479109	0.576602	0.451253	0.573816	0.657382	0.520891	0.423398	0.548747	0.426184
	0.354497	0.433862	0.529101	0.412698	0.566138	0.645503	0.566138	0.470899	0.587302	0.433862
	0.385965	0.461153	0.548872	0.431078	0.556391	0.614035	0.538847	0.451128	0.568922	0.443609
	0.391626	0.475369	0.564039	0.352217	0.492611	0.608374	0.524631	0.435961	0.647783	0.507389
	0.36855	0.395577	0.506143	0.304668	0.452088	0.63145	0.604423	0.493857	0.695332	0.547912
	0.387755	0.397959	0.55102	0.329082	0.459184	0.612245	0.602041	0.44898	0.670918	0.540816
	0.36758	0.356164	0.522831	0.269406	0.401826	0.63242	0.643836	0.477169	0.730594	0.598174
	0.378378	0.375921	0.523342	0.29484	0.457002	0.621622	0.624079	0.476658	0.70516	0.542998
	0.380048	0.375297	0.513064	0.315914	0.494062	0.619952	0.624703	0.486936	0.684086	0.505938
	0.347518	0.319149	0.477541	0.349882	0.520095	0.652482	0.680851	0.522459	0.650118	0.479905
	0.359202	0.370288	0.463415	0.361419	0.518847	0.640798	0.629712	0.536585	0.638581	0.481153
	0.376812	0.413043	0.502415	0.434783	0.495169	0.623188	0.586957	0.497585	0.565217	0.504831
	0.387615	0.426606	0.509174	0.461009	0.518349	0.612385	0.573394	0.490826	0.538991	0.481651
	0.375281	0.444944	0.555056	0.429213	0.519101	0.624719	0.555056	0.444944	0.570787	0.480899
	0.357488	0.396135	0.541063	0.449275	0.519324	0.642512	0.603865	0.458937	0.550725	0.480676
	0.332579	0.371041	0.524887	0.425339	0.486425	0.667421	0.628959	0.475113	0.574661	0.513575
	0.350211	0.402954	0.483122	0.455696	0.527426	0.649789	0.597046	0.516878	0.544304	0.472574
	0.349892	0.434125	0.522678	0.488121	0.576674	0.650108	0.565875	0.477322	0.511879	0.423326
	0.344371	0.412804	0.525386	0.487859	0.558499	0.655629	0.587196	0.474614	0.512141	0.441501
	0.333333	0.398323	0.459119	0.48847	0.465409	0.666667	0.601677	0.540881	0.51153	0.534591
	0.336134	0.37605	0.506303	0.470588	0.386555	0.663866	0.62395	0.493697	0.529412	0.613445
	0.317697	0.36887	0.50533	0.432836	0.332623	0.682303	0.63113	0.49467	0.567164	0.667377
	0.22865	0.300275	0.4573	0.460274	0.326027	0.77135	0.699725	0.5427	0.539726	0.673973
	0.00473934	0.436019	0.592417	0.490141	0.36338	0.995261	0.563981	0.407583	0.509859	0.63662
	0.00534759	0.342246	0.524064	0.461741	0.377309	0.994652	0.657754	0.475936	0.538259	0.622691
	0	0.41875	0.55	0.423592	0.324397	1	0.58125	0.45	0.576408	0.675603
	0	0.52795	0.639752	0.466146	0.382812	1	0.47205	0.360248	0.533854	0.617188
	0	0.545455	0.652406	0.468586	0.413613	1	0.454545	0.347594	0.531414	0.586387
	0.108696	0.521505	0.66129	0.460526	0.439474	0.891304	0.478495	0.33871	0.539474	0.560526
	0.472727	0.485577	0.658654	0.455764	0.453083	0.527273	0.514423	0.341346	0.544236	0.546917
	0.545455	0.535088	0.635965	0.375	0.383721	0.454545	0.464912	0.364035	0.625	0.616279
	0.675676	0.558824	0.578475	0.402204	0.424242	0.324324	0.441176	0.421525	0.597796	0.575758
	0.8125	0.584112	0.626168	0.40176	0.442815	0.1875	0.415888	0.373832	0.59824	0.557185
	0.857143	0.567227	0.62605	0.337278	0.420118	0.142857	0.432773	0.37395	0.662722	0.579882
	0.909091	0.528571	0.626667	0.371831	0.504225	0.0909091	0.471429	0.373333	0.628169	0.495775
	0.833333	0.514403	0.625954	0.416667	0.567204	0.166667	0.485597	0.374046	0.583333	0.432796
	0.931034	0.522727	0.642308	0.441799	0.600529	0.0689655	0.477273	0.357692	0.558201	0.399471
	0.846154	0.542969	0.605263	0.39548	0.556497	0.153846	0.457031	0.394737	0.60452	0.443503
	0.852941	0.55794	0.633962	0.422652	0.552486	0.147059	0.44206	0.366038	0.577348	0.447514
	0.902174	0.55336	0.608696	0.364672	0.461538	0.0978261	0.44664	0.391304	0.635328	0.538462
	0.875	0.570833	0.604167	0.353801	0.459064	0.125	0.429167	0.395833	0.646199	0.540936
	0.888889	0.585062	0.57197	0.362573	0.438596	0.111111	0.414938	0.42803	0.637427	0.561404
	0.840909	0.525292	0.637736	0.368421	0.454294	0.159091	0.474708	0.362264	0.631579	0.545706
	0.822917	0.55642	0.667774	0.32659	0.447977	0.177083	0.44358	0.332226	0.67341	0.552023
	0.838095	0.482213	0.66129	0.346821	0.473988	0.161905	0.517787	0.33871	0.653179	0.526012
	0.864865	0.518987	0.621795	0.390625	0.540625	0.135135	0.481013	0.378205	0.609375	0.459375
	0.853659	0.522822	0.603226	0.339506	0.407407	0.146341	0.477178	0.396774	0.660494	0.592593
	0.827586	0.520492	0.535316	0.33657	0.453074	0.172414	0.479508	0.464684	0.66343	0.546926
	0.85443	0.510791	0.510791	0.304075	0.438871	0.14557	0.489209	0.489209	0.695925	0.561129
	0.861702	0.482906	0.508197	0.328173	0.442724	0.138298	0.517094	0.491803	0.671827	0.557276
	0.866667	0.487179	0.502092	0.352	0.48	0.133333	0.512821	0.497908	0.648	0.52
	0.850962	0.489796	0.469388	0.354396	0.483516	0.149038	0.510204	0.530612	0.645604	0.516484
	0.836283	0.497797	0.519481	0.364407	0.511299	0.163717	0.502203	0.480519	0.635593	0.488701
	0.807512	0.512397	0.509881	0.382263	0.544343	0.192488	0.487603	0.490119	0.617737	0.455657
	0.754808	0.524194	0.530686	0.359551	0.494382	0.245192	0.475806	0.469314	0.640449	0.505618
	0.751174	0.483051	0.554422	0.365031	0.54908	0.248826	0.516949	0.445578	0.634969	0.45092
	0.741784	0.537255	0.551948	0.389571	0.552147	0.258216	0.462745	0.448052	0.610429	0.447853
	0.679245	0.548872	0.525253	0.372222	0.519444	0.320755	0.451128	0.474747	0.627778	0.480556
	0.674208	0.497976	0.534653	0.371508	0.541899	0.325792	0.502024	0.465347	0.628492	0.458101
	0.755869	0.446009	0.51505	0.289125	0.503979	0.244131	0.553991	0.48495	0.710875	0.496021
	0.693182	0.361991	0.533101	0.304843	0.518519	0.306818	0.638009	0.466899	0.695157	0.481481
	0.641176	0.409756	0.546667	0.292264	0.449857	0.358824	0.590244	0.453333	0.707736	0.550143
	0.644172	0.429952	0.526316	0.323615	0.510204	0.355828	0.570048	0.473684	0.676385	0.489796
	0.664634	0.431925	0.5625	0.318681	0.489011	0.335366	0.568075	0.4375	0.681319	0.510989
	0.689655	0.417526	0.551613	0.323699	0.491329	0.310345	0.582474	0.448387	0.676301	0.508671
	0.701987	0.39011	0.52027	0.349254	0.516418	0.298013	0.60989	0.47973	0.650746	0.483582
	0.728814	0.408257	0.517483	0.350453	0.510574	0.271186	0.591743	0.482517	0.649547	0.489426
	0.662651	0.264151	0.507194	0.360119	0.52381	0.337349	0.735849	0.492806	0.639881	0.47619
	0.657895	0.377682	0.534426	0.344411	0.613293	0.342105	0.622318	0.465574	0.655589	0.386707
	0.621212	0.413462	0.524242	0.360606	0.581818	0.378788	0.586538	0.475758	0.639394	0.418182
	0.616216	0.48	0.506098	0.347561	0.570122	0.383784	0.52	0.493902	0.652439	0.429878
	0.631068	0.4625	0.504532	0.311178	0.513595	0.368932	0.5375	0.495468	0.688822	0.486405
	0.556818	0.451327	0.461255	0.333333	0.513761	0.443182	0.548673	0.538745	0.666667	0.486239
	0.578378	0.43299	0.392713	0.376471	0.552941	0.421622	0.56701	0.607287	0.623529	0.447059
	0.649485	0.402778	0.373333	0.394813	0.587896	0.350515	0.597222	0.626667	0.605187	0.412104
	0.665072	0.428571	0.391837	0.337539	0.586751	0.334928	0.571429	0.608163	0.662461	0.413249
	0.636752	0.46875	0.394531	0.300971	0.634304	0.363248	0.53125	0.605469	0.699029	0.365696
	0.615721	0.521401	0.447471	0.359133	0.616099	0.384279	0.478599	0.552529	0.640867	0.383901
	0.63035	0.48659	0.425287	0.389058	0.641337	0.36965	0.51341	0.574713	0.610942	0.358663
	0.585062	0.483871	0.419355	0.33642	0.58642	0.414938	0.516129	0.580645	0.66358	0.41358
	0.642023	0.489437	0.440141	0.355828	0.579755	0.357977	0.510563	0.559859	0.644172	0.420245
	0.607438	0.509653	0.455598	0.3625	0.5875	0.392562	0.490347	0.544402	0.6375	0.4125
	0.614786	0.511111	0.444444	0.349057	0.559748	0.385214	0.488889	0.555556	0.650943	0.440252
	0.603239	0.498294	0.406143	0.34471	0.549488	0.396761	0.501706	0.593857	0.65529	0.450512
	0.590038	0.492701	0.379562	0.312704	0.537459	0.409962	0.507299	0.620438	0.687296	0.462541
	0.555556	0.451264	0.3213	0.33631	0.547619	0.444444	0.548736	0.6787	0.66369	0.452381
	0.546939	0.498328	0.408027	0.342541	0.544199	0.453061	0.501672	0.591973	0.657459	0.455801
	0.574899	0.493103	0.451724	0.280597	0.516418	0.425101	0.506897	0.548276	0.719403	0.483582
	0.556911	0.504886	0.416938	0.257576	0.509091	0.443089	0.495114	0.583062	0.742424	0.490909
	0.535088	0.520635	0.365079	0.336508	0.571429	0.464912	0.479365	0.634921	0.663492	0.428571
	0.52988	0.506135	0.371166	0.266871	0.530675	0.47012	0.493865	0.628834	0.733129	0.469325
	0.56705	0.531792	0.395954	0.254335	0.49422	0.43295	0.468208	0.604046	0.745665	0.50578
	0.558304	0.527697	0.428571	0.268222	0.492711	0.441696	0.472303	0.571429	0.731778	0.507289
	0.589552	0.509859	0.439437	0.31831	0.526761	0.410448	0.490141	0.560563	0.68169	0.473239
	0.621053	0.482759	0.437666	0.307692	0.501326	0.378947	0.517241	0.562334	0.692308	0.498674
	0.552743	0.538889	0.502778	0.363889	0.558333	0.447257	0.461111	0.497222	0.636111	0.441667
	0.557377	0.508671	0.479769	0.34104	0.563584	0.442623	0.491329	0.520231	0.65896	0.436416
	0.465306	0.490446	0.487261	0.347134	0.563694	0.534694	0.509554	0.512739	0.652866	0.436306
	0.48855	0.517028	0.510836	0.331269	0.551084	0.51145	0.482972	0.489164	0.668731	0.448916
	0.516014	0.539432	0.545741	0.318612	0.545741	0.483986	0.460568	0.454259	0.681388	0.454259
	0.533074	0.526646	0.532915	0.376176	0.485893	0.466926	0.473354	0.467085	0.623824	0.514107
	0.544	0.509695	0.523546	0.34626	0.409972	0.456	0.490305	0.476454	0.65374	0.590028
	0.512931	0.558559	0.582583	0.345345	0.432432	0.487069	0.441441	0.417417	0.654655	0.567568
	0.502008	0.540299	0.58209	0.391045	0.501493	0.497992	0.459701	0.41791	0.608955	0.498507
	0.422907	0.511551	0.521452	0.417417	0.468468	0.577093	0.488449	0.478548	0.582583	0.531532
	0.451613	0.461279	0.474747	0.453704	0.444444	0.548387	0.538721	0.525253	0.546296	0.555556
	0.465812	0.463918	0.522337	0.388704	0.48505	0.534188	0.536082	0.477663	0.611296	0.51495
	0.502024	0.520548	0.589041	0.340136	0.435374	0.497976	0.479452	0.410959	0.659864	0.564626
	0.528517	0.52862	0.59596	0.33887	0.438538	0.471483	0.47138	0.40404	0.66113	0.561462
	0.572954	0.534161	0.627329	0.34472	0.506211	0.427046	0.465839	0.372671	0.65528	0.493789
	0.567944	0.477352	0.56446	0.290541	0.462838	0.432056	0.522648	0.43554	0.709459	0.537162
	0.597403	0.441558	0.493506	0.314935	0.493506	0.402597	0.558442	0.506494	0.685065	0.506494
	0.587361	0.413669	0.582734	0.353535	0.52862	0.412639	0.586331	0.417266	0.646465	0.47138
	0.549815	0.437931	0.662069	0.369637	0.49505	0.450185	0.562069	0.337931	0.630363	0.50495
	0.567766	0.420712	0.61165	0.395415	0.467049	0.432234	0.579288	0.38835	0.604585	0.532951
	0.549091	0.445545	0.643564	0.434659	0.488636	0.450909	0.554455	0.356436	0.565341	0.511364
	0.525926	0.416084	0.667832	0.409938	0.450311	0.474074	0.583916	0.332168	0.590062	0.549689
	0.524904	0.427609	0.683502	0.39521	0.45509	0.475096	0.572391	0.316498	0.60479	0.54491
	0.503846	0.437063	0.706294	0.382263	0.46789	0.496154	0.562937	0.293706	0.617737	0.53211
	0.503472	0.40625	0.701389	0.390805	0.5	0.496528	0.59375	0.298611	0.609195	0.5
	0.563291	0.455696	0.759494	0.369822	0.43787	0.436709	0.544304	0.240506	0.630178	0.56213
	0.530201	0.42953	0.781879	0.371831	0.540845	0.469799	0.57047	0.218121	0.628169	0.459155
	0.463504	0.379562	0.766423	0.33125	0.465625	0.536496	0.620438	0.233577	0.66875	0.534375
	0.47037	0.388489	0.719424	0.314815	0.503086	0.52963	0.611511	0.280576	0.685185	0.496914
	0.473684	0.445993	0.703833	0.306931	0.478548	0.526316	0.554007	0.296167	0.693069	0.521452
	0.397004	0.489865	0.709459	0.310458	0.513072	0.602996	0.510135	0.290541	0.689542	0.486928
	0.43609	0.47079	0.621993	0.296736	0.41543	0.56391	0.52921	0.378007	0.703264	0.58457
	0.420635	0.471186	0.654237	0.334302	0.389535	0.579365	0.528814	0.345763	0.665698	0.610465
	0.397727	0.457237	0.592105	0.309249	0.427746	0.602273	0.542763	0.407895	0.690751	0.572254
	0.424812	0.462295	0.596721	0.340659	0.387363	0.575188	0.537705	0.403279	0.659341	0.612637
	0.391635	0.463023	0.639871	0.361702	0.412234	0.608365	0.536977	0.360129	0.638298	0.587766
	0.403101	0.427673	0.553459	0.372973	0.408108	0.596899	0.572327	0.446541	0.627027	0.591892
	0.43254	0.475083	0.604651	0.340483	0.359249	0.56746	0.524917	0.395349	0.659517	0.640751
	0.464151	0.495549	0.581602	0.363861	0.383663	0.535849	0.504451	0.418398	0.636139	0.616337
	0.426357	0.461783	0.573248	0.366834	0.432161	0.573643	0.538217	0.426752	0.633166	0.567839
	0.466165	0.48368	0.563798	0.343164	0.378016	0.533835	0.51632	0.436202	0.656836	0.621984
	0.488971	0.420195	0.547231	0.299742	0.330749	0.511029	0.579805	0.452769	0.700258	0.669251
	0.466926	0.367647	0.482353	0.356021	0.274869	0.533074	0.632353	0.517647	0.643979	0.725131
	0.482625	0.364179	0.474627	0.343066	0.277372	0.517375	0.635821	0.525373	0.656934	0.722628
	0.44523	0.419872	0.451923	0.407035	0.364322	0.55477	0.580128	0.548077	0.592965	0.635678
	0.46875	0.438272	0.429012	0.431122	0.433673	0.53125	0.561728	0.570988	0.568878	0.566327
	0.509375	0.452096	0.449102	0.454082	0.44898	0.490625	0.547904	0.550898	0.545918	0.55102
	0.47678	0.443425	0.458716	0.401099	0.403846	0.52322	0.556575	0.541284	0.598901	0.596154
	0.531847	0.382353	0.385294	0.4125	0.415	0.468153	0.617647	0.614706	0.5875	0.585
	0.526316	0.342105	0.365497	0.392683	0.431707	0.473684	0.657895	0.634503	0.607317	0.568293
	0.460526	0.33908	0.445402	0.375271	0.422993	0.539474	0.66092	0.554598	0.624729	0.577007
	0.4375	0.361702	0.528875	0.338384	0.426768	0.5625	0.638298	0.471125	0.661616	0.573232
	0.405405	0.378882	0.596273	0.325641	0.446154	0.594595	0.621118	0.403727	0.674359	0.553846
	0.443662	0.359621	0.577287	0.316883	0.467532	0.556338	0.640379	0.422713	0.683117	0.532468
	0.469091	0.389881	0.508929	0.297082	0.472149	0.530909	0.610119	0.491071	0.702918	0.527851
	0.42963	0.418398	0.474777	0.304	0.549333	0.57037	0.581602	0.525223	0.696	0.450667
	0.393822	0.37931	0.479624	0.32199	0.374346	0.606178	0.62069	0.520376	0.67801	0.625654
	0.4	0.337793	0.428094	0.286957	0.35942	0.6	0.662207	0.571906	0.713043	0.64058
	0.406015	0.37224	0.473186	0.305556	0.380556	0.593985	0.62776	0.526814	0.694444	0.619444
	0.427509	0.345133	0.486726	0.310992	0.420912	0.572491	0.654867	0.513274	0.689008	0.579088
	0.40856	0.323899	0.484277	0.32598	0.438725	0.59144	0.676101	0.515723	0.67402	0.561275
	0.45977	0.352564	0.519231	0.363868	0.503817	0.54023	0.647436	0.480769	0.636132	0.496183
	0.463878	0.427653	0.578778	0.38601	0.435233	0.536122	0.572347	0.421222	0.61399	0.564767
	0.410853	0.404459	0.531847	0.376168	0.436916	0.589147	0.595541	0.468153	0.623832	0.563084
	0.449275	0.435356	0.53562	0.414188	0.496568	0.550725	0.564644	0.46438	0.585812	0.503432
	0.440433	0.414773	0.548295	0.390361	0.501205	0.559567	0.585227	0.451705	0.609639	0.498795
	0.392996	0.403614	0.554217	0.414458	0.554217	0.607004	0.596386	0.445783	0.585542	0.445783
	0.25	0.430267	0.566766	0.422633	0.556582	0.75	0.569733	0.433234	0.577367	0.443418
	0	0.460411	0.539589	0.433333	0.58	1	0.539589	0.460411	0.566667	0.42
	0	0.459318	0.52231	0.441304	0.543478	1	0.540682	0.47769	0.558696	0.456522
	0.236842	0.394886	0.491477	0.386861	0.510949	0.763158	0.605114	0.508523	0.613139	0.489051
	0.5625	0.397759	0.473389	0.335802	0.498765	0.4375	0.602241	0.526611	0.664198	0.501235
	0.5	0.420613	0.545961	0.327907	0.476744	0.5	0.579387	0.454039	0.672093	0.523256
	0.7	0.429363	0.556787	0.353349	0.418014	0.3	0.570637	0.443213	0.646651	0.581986
	0.909091	0.4375	0.565217	0.349666	0.47216	0.0909091	0.5625	0.434783	0.650334	0.52784
	0.967213	0.460048	0.552058	0.329519	0.439359	0.0327869	0.539952	0.447942	0.670481	0.560641
	0.988506	0.441247	0.539568	0.331754	0.445498	0.0114943	0.558753	0.460432	0.668246	0.554502
	0.978723	0.467136	0.528169	0.328638	0.420188	0.0212766	0.532864	0.471831	0.671362	0.579812
	0.9375	0.473146	0.514066	0.312057	0.390071	0.0625	0.526854	0.485934	0.687943	0.609929
	0.935484	0.425474	0.498645	0.324645	0.424171	0.0645161	0.574526	0.501355	0.675355	0.575829
	0.948276	0.379404	0.460705	0.354839	0.407834	0.0517241	0.620596	0.539295	0.645161	0.592166
	0.929204	0.405405	0.518919	0.389873	0.468354	0.0707965	0.594595	0.481081	0.610127	0.531646
	0.93985	0.366755	0.480211	0.367397	0.450122	0.0601504	0.633245	0.519789	0.632603	0.549878
	0.882353	0.347709	0.479784	0.351039	0.397229	0.117647	0.652291	0.520216	0.648961	0.602771
	0.875817	0.360335	0.48324	0.340336	0.443277	0.124183	0.639665	0.51676	0.659664	0.556723
	0.892473	0.368421	0.538012	0.33049	0.434968	0.107527	0.631579	0.461988	0.66951	0.565032
	0.876471	0.356522	0.486957	0.319475	0.450766	0.123529	0.643478	0.513043	0.680525	0.549234
	0.877301	0.345269	0.462916	0.334821	0.426339	0.122699	0.654731	0.537084	0.665179	0.573661
	0.8625	0.352792	0.494924	0.345572	0.425486	0.1375	0.647208	0.505076	0.654428	0.574514
	0.844311	0.367403	0.51105	0.31087	0.369565	0.155689	0.632597	0.48895	0.68913	0.630435
	0.836735	0.362667	0.509333	0.314775	0.359743	0.163265	0.637333	0.490667	0.685225	0.640257
	0.859903	0.342776	0.532578	0.293556	0.381862	0.140097	0.657224	0.467422	0.706444	0.618138
	0.811828	0.348066	0.491713	0.224747	0.348485	0.188172	0.651934	0.508287	0.775253	0.651515
	0.80303	0.343164	0.402145	0.262735	0.399464	0.19697	0.656836	0.597855	0.737265	0.600536
	0.75	0.288089	0.398892	0.243968	0.474531	0.25	0.711911	0.601108	0.756032	0.525469
	0.697802	0.286154	0.369231	0.236074	0.384615	0.302198	0.713846	0.630769	0.763926	0.615385
	0.691429	0.318713	0.385965	0.277372	0.440389	0.308571	0.681287	0.614035	0.722628	0.559611
	0.692308	0.324786	0.381766	0.321429	0.483333	0.307692	0.675214	0.618234	0.678571	0.516667
	0.705556	0.341902	0.359897	0.297235	0.465438	0.294444	0.658098	0.640103	0.702765	0.534562
	0.655367	0.324051	0.379747	0.306977	0.472093	0.344633	0.675949	0.620253	0.693023	0.527907
	0.636364	0.31405	0.435262	0.322738	0.503667	0.363636	0.68595	0.564738	0.677262	0.496333
	0.544218	0.335106	0.454787	0.377724	0.520581	0.455782	0.664894	0.545213	0.622276	0.479419
	0.557143	0.345845	0.47185	0.359712	0.505995	0.442857	0.654155	0.52815	0.640288	0.494005
	0.562963	0.315927	0.488251	0.389497	0.43326	0.437037	0.684073	0.511749	0.610503	0.56674
	0.621622	0.329759	0.47185	0.364629	0.373362	0.378378	0.670241	0.52815	0.635371	0.626638
	0.597222	0.333333	0.431034	0.387164	0.405797	0.402778	0.666667	0.568966	0.612836	0.594203
	0.657534	0.273585	0.424528	0.362869	0.402954	0.342466	0.726415	0.575472	0.637131	0.597046
	0.651316	0.2375	0.41875	0.354582	0.426295	0.348684	0.7625	0.58125	0.645418	0.573705
	0.651899	0.23127	0.423453	0.361345	0.42437	0.348101	0.76873	0.576547	0.638655	0.57563
	0.615854	0.217391	0.424749	0.383966	0.478903	0.384146	0.782609	0.575251	0.616034	0.521097
	0.666667	0.242038	0.455414	0.363458	0.48723	0.333333	0.757962	0.544586	0.636542	0.51277
	0.605096	0.285714	0.408638	0.365904	0.525988	0.394904	0.714286	0.591362	0.634096	0.474012
	0.640212	0.206557	0.413115	0.374737	0.486316	0.359788	0.793443	0.586885	0.625263	0.513684
	0.677966	0.259259	0.404321	0.345041	0.485537	0.322034	0.740741	0.595679	0.654959	0.514463
	0.648936	0.261765	0.3	0.327549	0.505423	0.351064	0.738235	0.7	0.672451	0.494577
	0.609137	0.265714	0.274286	0.318982	0.477495	0.390863	0.734286	0.725714	0.681018	0.522505
	0.611111	0.30814	0.325581	0.33908	0.44636	0.388889	0.69186	0.674419	0.66092	0.55364
	0.567073	0.334184	0.357143	0.320565	0.433468	0.432927	0.665816	0.642857	0.679435	0.566532
	0.63125	0.413098	0.413098	0.294118	0.394958	0.36875	0.586902	0.586902	0.705882	0.605042
	0.528169	0.416459	0.451372	0.298475	0.420479	0.471831	0.583541	0.548628	0.701525	0.579521
	0.603659	0.310769	0.424615	0.321041	0.475054	0.396341	0.689231	0.575385	0.678959	0.524946
	0.48	0.334286	0.425714	0.33833	0.466809	0.52	0.665714	0.574286	0.66167	0.533191
	0.552326	0.355422	0.409639	0.322	0.448	0.447674	0.644578	0.590361	0.678	0.552
	0.573171	0.347222	0.452778	0.327236	0.47561	0.426829	0.652778	0.547222	0.672764	0.52439
	0.607595	0.332447	0.385638	0.31015	0.422932	0.392405	0.667553	0.614362	0.68985	0.577068
	0.578378	0.319885	0.371758	0.300589	0.414538	0.421622	0.680115	0.628242	0.699411	0.585462
	0.637755	0.324786	0.390313	0.321649	0.445361	0.362245	0.675214	0.609687	0.678351	0.554639
	0.631016	0.338983	0.42615	0.32998	0.480885	0.368984	0.661017	0.57385	0.67002	0.519115
	0.655172	0.360382	0.434368	0.28629	0.405242	0.344828	0.639618	0.565632	0.71371	0.594758
	0.637209	0.369615	0.455782	0.262	0.362	0.362791	0.630385	0.544218	0.738	0.638
	0.607143	0.349057	0.455189	0.224401	0.366013	0.392857	0.650943	0.544811	0.775599	0.633987
	0.622727	0.353222	0.491647	0.251656	0.417219	0.377273	0.646778	0.508353	0.748344	0.582781
	0.649351	0.341709	0.419598	0.260128	0.379531	0.350649	0.658291	0.580402	0.739872	0.620469
	0.669811	0.341404	0.443099	0.244898	0.396825	0.330189	0.658596	0.556901	0.755102	0.603175
	0.65625	0.298824	0.407059	0.242826	0.423841	0.34375	0.701176	0.592941	0.757174	0.576159
	0.610329	0.330769	0.402564	0.25641	0.431235	0.389671	0.669231	0.597436	0.74359	0.568765
	0.66087	0.326034	0.384428	0.262931	0.456897	0.33913	0.673966	0.615572	0.737069	0.543103
	0.655022	0.332474	0.407216	0.263499	0.466523	0.344978	0.667526	0.592784	0.736501	0.533477
	0.615741	0.308434	0.356627	0.272177	0.475806	0.384259	0.691566	0.643373	0.727823	0.524194
	0.634146	0.319693	0.383632	0.230769	0.463617	0.365854	0.680307	0.616368	0.769231	0.536383
	0.586735	0.321256	0.376812	0.240084	0.450939	0.413265	0.678744	0.623188	0.759916	0.549061
	0.5	0.311321	0.379717	0.229614	0.454936	0.5	0.688679	0.620283	0.770386	0.545064
	0.580952	0.382979	0.432624	0.252632	0.511579	0.419048	0.617021	0.567376	0.747368	0.488421
	0.548673	0.371365	0.39821	0.285714	0.491597	0.451327	0.628635	0.60179	0.714286	0.508403
	0.535545	0.361364	0.365909	0.293033	0.512295	0.464455	0.638636	0.634091	0.706967	0.487705
	0.553398	0.368304	0.366071	0.334052	0.528017	0.446602	0.631696	0.633929	0.665948	0.471983
	0.431507	0.382212	0.370192	0.351293	0.517241	0.568493	0.617788	0.629808	0.648707	0.482759
	0.494505	0.385321	0.362385	0.34608	0.474187	0.505495	0.614679	0.637615	0.65392	0.525813
	0.590909	0.382932	0.345733	0.333333	0.476471	0.409091	0.617068	0.654267	0.666667	0.523529
	0.670732	0.354911	0.359375	0.354455	0.489109	0.329268	0.645089	0.640625	0.645545	0.510891
	0.703704	0.364465	0.378132	0.339048	0.499048	0.296296	0.635535	0.621868	0.660952	0.500952
	1	0.380723	0.424096	0.351145	0.446565	0	0.619277	0.575904	0.648855	0.553435
	0.934783	0.331683	0.423267	0.342644	0.452514	0.0652174	0.668317	0.576733	0.657356	0.547486
	0.944444	0.306954	0.419664	0.381132	0.509434	0.0555556	0.693046	0.580336	0.618868	0.490566
	0.957447	0.284653	0.329208	0.369942	0.468208	0.0425532	0.715347	0.670792	0.630058	0.531792
	0.952381	0.313316	0.357702	0.344609	0.446089	0.047619	0.686684	0.642298	0.655391	0.553911
	0.96	0.31831	0.402817	0.314775	0.449679	0.04	0.68169	0.597183	0.685225	0.550321
	0.951613	0.29321	0.333333	0.324268	0.443515	0.0483871	0.70679	0.666667	0.675732	0.556485
	0.91358	0.312684	0.368732	0.276371	0.402954	0.0864198	0.687316	0.631268	0.723629	0.597046
	0.925532	0.304478	0.385075	0.26294	0.393375	0.0744681	0.695522	0.614925	0.73706	0.606625
	0.956897	0.260989	0.32967	0.294896	0.42155	0.0431034	0.739011	0.67033	0.705104	0.57845
	0.927928	0.306407	0.376045	0.288848	0.424132	0.0720721	0.693593	0.623955	0.711152	0.575868
	0.930435	0.268571	0.42	0.302583	0.418819	0.0695652	0.731429	0.58	0.697417	0.581181
	0.917355	0.300275	0.404959	0.311321	0.422642	0.0826446	0.699725	0.595041	0.688679	0.577358
	0.862069	0.294286	0.391429	0.331481	0.427778	0.137931	0.705714	0.608571	0.668519	0.572222
	0.873418	0.259475	0.373178	0.316306	0.422397	0.126582	0.740525	0.626822	0.683694	0.577603
	0.914634	0.307042	0.377465	0.20362	0.355204	0.0853659	0.692958	0.622535	0.79638	0.644796
	0.84507	0.306878	0.333333	0.113757	0.388889	0.15493	0.693122	0.666667	0.886243	0.611111
	0.853333	0.309693	0.352246	0.1513	0.432624	0.146667	0.690307	0.647754	0.8487	0.567376
	0.851064	0.340426	0.392435	0.156028	0.460993	0.148936	0.659574	0.607565	0.843972	0.539007
	0.876106	0.273936	0.37766	0.159574	0.539894	0.123894	0.726064	0.62234	0.840426	0.460106
	0.876923	0.277311	0.389356	0.193277	0.557423	0.123077	0.722689	0.610644	0.806723	0.442577
	0.882353	0.298153	0.377309	0.216359	0.530343	0.117647	0.701847	0.622691	0.783641	0.469657
	0.906832	0.284595	0.368146	0.229765	0.464752	0.0931677	0.715405	0.631854	0.770235	0.535248
	0.912088	0.293827	0.37037	0.244444	0.439506	0.0879121	0.706173	0.62963	0.755556	0.560494
	0.90404	0.23545	0.365079	0.269841	0.47619	0.0959596	0.76455	0.634921	0.730159	0.52381
	0.9	0.109966	0.422713	0.362776	0.457413	0.1	0.890034	0.577287	0.637224	0.542587
	0.853403	0	0.42284	0.401235	0.438272	0.146597	1	0.57716	0.598765	0.561728
	0.868293	0.131707	0.438438	0.45045	0.456456	0.131707	0.868293	0.561562	0.54955	0.543544
	0.816754	0.209424	0.427729	0.442478	0.421829	0.183246	0.790576	0.572271	0.557522	0.578171
	0.716981	0.194969	0.511561	0.595376	0.471098	0.283019	0.805031	0.488439	0.404624	0.528902
	0.707006	0.286624	0.48048	0.606607	0.45045	0.292994	0.713376	0.51952	0.393393	0.54955
	0.698718	0.416667	0.404834	0.610272	0.392749	0.301282	0.583333	0.595166	0.389728	0.607251
	0.704545	0.607955	0.420382	0.566879	0.458599	0.295455	0.392045	0.579618	0.433121	0.541401
	0.689441	0.658385	0.397351	0.612583	0.44702	0.310559	0.341615	0.602649	0.387417	0.55298
	0.7	0.688889	0.316239	0.628205	0.466387	0.3	0.311111	0.683761	0.371795	0.533613
	0.711443	0.731343	0.243781	0.761194	0.429787	0.288557	0.268657	0.756219	0.238806	0.570213
	0.744493	0.806167	0.387665	0.92511	0.475771	0.255507	0.193833	0.612335	0.0748899	0.524229
