# Supplementary material for: Rapid binding to protofilament edge sites facilitates tip tracking of EB1 at growing microtubule plus-ends
Source: eLife. 2024 Feb 22;13:e91719. doi: 10.7554/eLife.91719 (PMC10883673; doi:10.7554/eLife.91719)
Supplement: Figure 1—figure supplement 2—source data 1. [file elife-91719-fig1-figsupp2-data1.xlsx]

## Sheet: Fig 1 Sup Fig 2 A,B
A	Background subtracted								B	normalized background subtracted									averages									std error									normalized std error											Individuals
Position	.125x back subtract average	.25x back subtract average	.5x back subtract average	1x back subtract average	2x back subtract average	4x back subtract average	8x back subtract average		position	.125x normalized back subtract average	.25x normalized back subtract average	.5x normalized back subtract average	1x normalized back subtract average	2x normalized back subtract average	4x normalized back subtract average	8x normalized back subtract average			position	.125x average	.25x average	.5x average	1x average	2x average	4x average	8x average		position	.125x std error	.25x std error	.5x std error	1x std error	2x std error	4x std error	8x std error		position	.125x normalized std error	.25x normalized std error	.5x normalized std error	1x normalized std error	2x normalized std error	4x normalized std error	8x normalized std error				position	.125x run1
2496	5.91364	0.85	17.1083	14.725	8.0591	5.92917	12.0062		2496	0.0555247	0.00647085	0.108172	0.0827906	0.0455178	0.0332947	0.0656235			2496	61.2773	52.1417	71.15	64	55.6077	54.0167	53.3638		2496	2.00333	4.11272	5.69219	4.13299	3.40018	3.46243	4.21507		2496	0.0188098	0.0313092	0.0359904	0.0232375	0.0192042	0.019443	0.0230387				2496	54
2432	6.08636	1.71667	17.1083	15.005	8.45143	6.90417	12.8319		2432	0.0571465	0.0130686	0.108172	0.0843649	0.0477337	0.0387698	0.0701364			2432	61.45	53.0083	71.15	64.28	56	54.9917	54.1895		2432	2.30175	4.49142	5.68046	3.31812	3.85279	3.68134	4.25262		2432	0.0216118	0.0341921	0.0359163	0.018656	0.0217606	0.0206723	0.023244				2432	53.2
2368	5.99091	2.76667	17.5333	14.0917	9.1366	8.07083	11.6767		2368	0.0562503	0.021062	0.110859	0.0792297	0.0516036	0.0453211	0.0638223			2368	61.3545	54.0583	71.575	63.3667	56.6852	56.1583	53.0343		2368	2.56358	4.69717	5.71557	2.64761	4.05991	3.85653	4.03544		2368	0.0240701	0.0357584	0.0361383	0.014886	0.0229304	0.021656	0.0220569				2368	52
2304	5.90909	4.4	18.075	14.8583	10.1791	7.6125	11.9795		2304	0.0554821	0.0334962	0.114284	0.0835403	0.0574916	0.0427473	0.0654776			2304	61.2727	55.6917	72.1167	64.1333	57.7277	55.7	53.3371		2304	2.74603	4.72009	5.697	2.40817	3.98644	3.57121	4.03167		2304	0.0257832	0.0359329	0.0360209	0.0135398	0.0225155	0.0200538	0.0220363				2304	50.6
2240	5.45909	6.33333	18.7917	16.1417	11.5119	8.29107	9.7785		2240	0.0512569	0.0482142	0.118816	0.0907558	0.0650195	0.0465578	0.0534473			2240	60.8227	57.625	72.8333	65.4167	59.0605	56.3786	51.1361		2240	2.78322	4.75821	5.87564	2.45226	3.56552	3.43625	4.08686		2240	0.0261324	0.0362231	0.0371504	0.0137877	0.0201381	0.019296	0.0223379				2240	49.2
2176	5.21364	8.69167	19.525	17.6	12.1677	8.90536	9.86238		2176	0.0489522	0.0661676	0.123452	0.0989552	0.0687233	0.0500073	0.0539058			2176	60.5773	59.9833	73.5667	66.875	59.7163	56.9929	51.22		2176	2.74655	4.77659	6.03626	2.37176	2.71411	3.24411	4.06636		2176	0.0257881	0.036363	0.038166	0.0133351	0.0153293	0.018217	0.0222259				2176	48.2
2112	5.19091	11.425	20.1417	19.125	13.1311	8.15625	9.97163		2112	0.0487389	0.0869758	0.127351	0.107529	0.0741648	0.0458007	0.0545029			2112	60.5545	62.7167	74.1833	68.4	60.6797	56.2437	51.3293		2112	2.66313	4.89231	6.2619	2.57811	2.46756	2.9533	3.9988		2112	0.0250048	0.037244	0.0395926	0.0144953	0.0139368	0.016584	0.0218566				2112	48
2048	5.35	13.775	20.225	20.1167	13.8064	9.05	10.1994		2048	0.0502326	0.104866	0.127878	0.113105	0.0779788	0.0508195	0.0557477			2048	60.7136	65.0667	74.2667	69.3917	61.355	57.1375	51.557		2048	2.60211	5.10221	6.34379	2.70833	2.55953	2.74458	3.92354		2048	0.0244319	0.038842	0.0401104	0.0152275	0.0144562	0.0154119	0.0214453				2048	47.8
1984	5.96818	15.8	19.95	20.775	14.2736	10.3313	10.3421		1984	0.0560369	0.120282	0.126139	0.116806	0.0806172	0.0580142	0.056528			1984	61.3318	67.0917	73.9917	70.05	61.8221	58.4188	51.6998		1984	2.61493	5.28985	6.33588	2.75174	2.76919	2.4728	3.82999		1984	0.0245523	0.0402704	0.0400604	0.0154715	0.0156404	0.0138858	0.0209339				1984	48.6
1920	6.75455	16.9167	19.0583	21.25	14.3621	11.6187	10.561		1920	0.0634203	0.128783	0.120502	0.119477	0.0811175	0.0652441	0.0577243			1920	62.1182	68.2083	73.1	70.525	61.9107	59.7062	51.9186		1920	2.65955	5.4249	6.21231	2.80906	2.94265	2.24692	3.78445		1920	0.0249712	0.0412985	0.039279	0.0157938	0.0166201	0.0126174	0.020685				1920	50
1856	7.5	17.775	17.7083	21.5	14.3493	13.0562	10.942		1856	0.0704195	0.135317	0.111966	0.120883	0.0810449	0.0733163	0.0598068			1856	62.8636	69.0667	71.75	70.775	61.8979	61.1437	52.2996		1856	2.73151	5.34055	5.90676	2.80188	2.87433	2.15656	3.82374		1856	0.0256469	0.0406564	0.0373472	0.0157534	0.0162343	0.01211	0.0208998				1856	51.4
1792	8.31364	18.35	16.3167	21.6833	14.6646	14.1375	11.3115		1792	0.078059	0.139694	0.103167	0.121914	0.0828256	0.0793879	0.0618264			1792	63.6773	69.6417	70.3583	70.9583	62.2131	62.225	52.6691		1792	2.78145	5.12351	5.49068	2.81579	2.62538	2.2846	3.89127		1792	0.0261158	0.0390041	0.0347163	0.0158316	0.0148282	0.0128289	0.0212689				1792	52.8
1728	9.04545	18.7167	15.1	22.1083	15.2876	14.8875	12.0681		1728	0.0849302	0.142486	0.0954739	0.124303	0.0863443	0.0835995	0.0659619			1728	64.4091	70.0083	69.1417	71.3833	62.8361	62.975	53.4258		1728	2.75553	4.87095	5.09063	2.77092	2.3114	2.51897	4.02058		1728	0.0258725	0.0370814	0.0321869	0.0155794	0.0130548	0.0141451	0.0219757				1728	52.8
1664	9.94091	19.3167	14.5	22.675	16.1579	15.2813	12.8819		1664	0.0933379	0.147053	0.0916803	0.127489	0.0912597	0.0858105	0.0704097			1664	65.3045	70.6083	68.5417	71.95	63.7064	63.3688	54.2395		1664	2.68086	4.5985	4.67916	2.79402	2.12008	2.73987	4.10808		1664	0.0251713	0.0350073	0.0295853	0.0157092	0.0119742	0.0153855	0.0224539				1664	52.4
1600	10.9	19.8667	14.1	23.275	17.0507	15.4188	14.2268		1600	0.102343	0.15124	0.0891512	0.130863	0.0963026	0.0865827	0.0777606			1600	66.2636	71.1583	68.1417	72.55	64.5993	63.5063	55.5844		1600	2.57252	4.33658	4.43121	2.65013	2.12244	2.90036	4.1434		1600	0.0241541	0.0330133	0.0280176	0.0149002	0.0119876	0.0162867	0.022647				1600	51.2
1536	12.1364	20.5417	14.15	24.0917	17.9084	15.5875	15.8005		1536	0.113952	0.156379	0.0894673	0.135454	0.101147	0.0875303	0.0863624			1536	67.5	71.8333	68.1917	73.3667	65.457	63.675	57.1581		1536	2.48534	4.03	4.21447	2.51105	2.21338	2.9313	4.24788		1536	0.0233355	0.0306795	0.0266471	0.0141183	0.0125012	0.0164604	0.0232181				1536	50.2
1472	13.55	21.6167	14.9583	25.1833	18.7603	15.9938	17.654		1472	0.127225	0.164563	0.0945782	0.141592	0.105958	0.0898115	0.0964932			1472	68.9136	72.9083	69	74.4583	66.3089	64.0813	59.0116		1472	2.32489	3.6551	4.08765	2.42133	2.28404	2.87398	4.31007		1472	0.0218291	0.0278254	0.0258453	0.0136138	0.0129003	0.0161386	0.0235579				1472	51
1408	15.3909	22.6167	16.225	26.525	19.7763	16.575	19.4003		1408	0.144509	0.172175	0.102587	0.149136	0.111697	0.0930755	0.106038			1408	70.7545	73.9083	70.2667	75.8	67.3249	64.6625	60.7579		1408	2.13871	3.10963	3.88005	2.48641	2.31398	2.70467	4.2041		1408	0.0200809	0.0236729	0.0245327	0.0139797	0.0130694	0.0151878	0.0229788				1408	54
1344	17.4955	23.3333	18.4583	28.1417	20.8736	17.6187	20.9325		1344	0.16427	0.177631	0.116708	0.158225	0.117894	0.0989366	0.114413			1344	72.8591	74.625	72.5	77.4167	68.4221	65.7062	62.2901		1344	1.89367	2.59593	3.62116	2.90884	2.27199	2.53258	4.01875		1344	0.0177802	0.0197622	0.0228958	0.0163548	0.0128322	0.0142215	0.0219657				1344	58.6
1280	19.8682	23.8417	21.625	29.8	22.0651	18.8937	22.0924		1280	0.186548	0.181501	0.13673	0.167549	0.124624	0.106096	0.120752			1280	75.2318	75.1333	75.6667	79.075	69.6137	66.9812	63.45		1280	1.63937	2.13524	3.30913	3.48205	2.2321	2.48195	3.65159		1280	0.0153925	0.0162551	0.0209229	0.0195777	0.0126069	0.0139372	0.0199589				1280	64.2
1216	22.3318	24.2	25.1083	31.325	23.1801	20.3563	22.5704		1216	0.209679	0.184229	0.158754	0.176123	0.130922	0.114309	0.123365			1216	77.6955	75.4917	79.15	80.6	70.7287	68.4438	63.928		1216	1.54128	1.91683	2.94333	4.0147	2.40334	2.54685	3.30073		1216	0.0144715	0.0145923	0.01861	0.0225724	0.0135741	0.0143016	0.0180411				1216	69.4
1152	25.0227	24.7417	28.9	32.2917	24.1191	22.0313	22.879		1152	0.234945	0.188352	0.182728	0.181558	0.136225	0.123715	0.125052			1152	80.3864	76.0333	82.9417	81.5667	71.6677	70.1188	64.2366		1152	1.61509	1.84837	2.54396	4.18872	2.63689	2.74126	3.10093		1152	0.0151645	0.0140712	0.0160849	0.0235509	0.0148932	0.0153933	0.0169491				1152	73
1088	27.6136	25.8417	32.4417	32.7417	25.135	23.7375	23.152		1088	0.259272	0.196727	0.205121	0.184088	0.141963	0.133296	0.126544			1088	82.9773	77.1333	86.4833	82.0167	72.6836	71.825	64.5096		1088	1.94323	1.86587	2.38589	4.03281	2.75967	2.89364	3.06436		1088	0.0182455	0.0142044	0.0150854	0.0226743	0.0155866	0.016249	0.0167492				1088	75
1024	29.9909	27.2333	35.6167	33.1333	26.2454	25.5187	23.7992		1024	0.281593	0.207321	0.225196	0.186291	0.148234	0.143298	0.130082			1024	85.3545	78.525	89.6583	82.4083	73.794	73.6062	65.1569		1024	2.34924	2.14171	2.31866	3.51166	2.62656	3.05924	3.153		1024	0.0220577	0.0163043	0.0146604	0.0197441	0.0148348	0.0171789	0.0172337				1024	75.8
960	31.7	28.8583	38.3333	33.7667	28.4761	27.5625	25.0691		960	0.29764	0.219692	0.242373	0.189851	0.160833	0.154775	0.137023			960	87.0636	80.15	92.375	83.0417	76.0247	75.65	66.4267		960	2.70067	2.50774	2.47846	2.98511	2.30059	3.25525	3.27949		960	0.0253574	0.0190908	0.0156707	0.0167836	0.0129938	0.0182796	0.017925				960	75.8
896	32.8318	30.7417	40.8417	34.3167	31.3861	29.8125	26.9388		896	0.308267	0.234029	0.258233	0.192944	0.177269	0.16741	0.147242			896	88.1955	82.0333	94.8833	83.5917	78.9347	77.9	68.2964		896	2.84748	2.97262	2.62281	2.8932	1.87704	3.45336	3.47443		896	0.0267358	0.0226299	0.0165834	0.0162669	0.0106015	0.0193921	0.0189906				896	76.6
832	33.5864	32.3583	43.2333	35.7417	35.6179	32.1	29.5093		832	0.315351	0.246336	0.273355	0.200956	0.20117	0.180255	0.161292			832	88.95	83.65	97.275	85.0167	83.1664	80.1875	70.8669		832	2.73453	3.47561	2.86419	3.15369	1.51948	3.51049	3.65197		832	0.0256752	0.026459	0.0181096	0.0177315	0.00858204	0.0197129	0.0199609				832	77.6
768	34.7455	34.2667	45.5167	38.025	40.9104	34.7875	32.6908		768	0.326234	0.260864	0.287792	0.213794	0.231062	0.195346	0.178681			768	90.1091	85.5583	99.5583	87.3	88.459	82.875	74.0484		768	2.55848	3.97943	3.08991	3.54268	1.53168	3.59257	3.81273		768	0.0240223	0.0302945	0.0195368	0.0199185	0.00865092	0.0201738	0.0208396				768	79.6
704	36.5636	36.325	47.9417	41.475	46.997	37.6688	36.444		704	0.343306	0.276534	0.303125	0.233191	0.265439	0.211526	0.199196			704	91.9273	87.6167	101.983	90.75	94.5456	85.7563	77.8016		704	2.56438	4.30261	3.26568	3.75024	2.09398	3.56488	3.96829		704	0.0240777	0.0327548	0.0206482	0.0210855	0.0118268	0.0200183	0.0216899				704	82
640	39.3455	39.1167	50.6333	46.175	53.4859	41.4563	41.13		640	0.369425	0.297786	0.320143	0.259617	0.302089	0.232794	0.224808			640	94.7091	90.4083	104.675	95.45	101.034	89.5438	82.4876		640	2.7459	4.26648	3.32152	3.70523	2.90368	3.66991	4.1394		640	0.025782	0.0324797	0.0210012	0.0208325	0.0164	0.0206081	0.0226252				640	85.4
576	43.3227	42.9833	54.225	52.2417	60.5656	46.5063	47.1473		576	0.406769	0.327222	0.342853	0.293726	0.342075	0.261152	0.257697			576	98.6864	94.275	108.267	101.517	108.114	94.5938	88.5049		576	3.02863	3.85648	3.34055	3.61389	3.81161	3.90014	4.42231		576	0.0284366	0.0293585	0.0211215	0.0203189	0.021528	0.0219009	0.0241714				576	89.2
512	48.4227	48.6083	59.2917	60.15	68.2336	53.5687	55.2511		512	0.454654	0.370044	0.374888	0.338191	0.385384	0.300811	0.301992			512	103.786	99.9	113.333	109.425	115.782	101.656	96.6088		512	3.40944	3.22929	3.31785	3.50404	4.59764	4.37405	4.73912		512	0.0320122	0.0245838	0.020978	0.0197013	0.0259675	0.0245621	0.0259031				512	93.6
448	54.5091	56.0667	66.625	70.3917	77.3221	63.5312	65.9588		448	0.511801	0.426822	0.421255	0.395774	0.436716	0.356754	0.360517			448	109.873	107.358	120.667	119.667	124.871	111.619	107.316		448	3.70703	2.70623	3.35151	3.58908	5.11097	5.04377	5.15344		448	0.0348063	0.0206019	0.0211908	0.0201794	0.0288668	0.0283229	0.0281676				448	99.4
384	61.5	65.95	77.075	83.325	88.833	76.9375	79.9853		384	0.57744	0.502062	0.487328	0.468491	0.50173	0.432036	0.437183			384	116.864	117.242	131.117	132.6	136.382	125.025	121.343		384	3.97785	2.51325	3.49845	3.96681	5.4289	5.60266	5.42184		384	0.0373491	0.0191328	0.0221199	0.0223032	0.0306625	0.0314613	0.0296347				384	106.6
320	69.6045	78.275	90.8833	99.75	103.173	94.1625	97.9351		320	0.653536	0.595889	0.574635	0.56084	0.582722	0.528761	0.535294			320	124.968	129.567	144.925	149.025	150.722	142.25	139.293		320	4.01959	2.51635	3.93682	4.30684	5.35542	5.87394	5.45637		320	0.037741	0.0191564	0.0248917	0.024215	0.0302474	0.0329846	0.0298234				320	116.2
256	78.6409	92.1583	107.767	119.142	120.678	114.556	118.978		256	0.738381	0.70158	0.681385	0.669868	0.68159	0.643281	0.65031			256	134.005	143.45	161.808	168.417	168.227	162.644	160.336		256	4.0195	2.73107	4.37785	4.36135	4.89912	5.6578	5.2127		256	0.0377401	0.020791	0.0276802	0.0245215	0.0276703	0.0317709	0.0284916				256	128.4
192	88.1136	106.458	125.925	139.983	139.678	136.425	141.543		192	0.827323	0.810442	0.796196	0.78705	0.788903	0.766083	0.773646			192	143.477	157.75	179.967	189.258	187.227	184.512	182.901		192	3.98737	3.37982	4.91492	4.02203	4.04907	4.90231	4.58951		192	0.0374385	0.0257298	0.031076	0.0226137	0.0228692	0.0275285	0.0250854				192	141
128	96.8591	119.133	142.517	159.408	158.07	156.906	162.534		128	0.909436	0.906934	0.901101	0.896266	0.892781	0.881094	0.888377			128	152.223	170.425	196.558	208.683	205.619	204.994	203.892		128	4.02754	4.67029	5.50175	3.28113	2.91252	3.65324	3.76598		128	0.0378156	0.0355538	0.0347863	0.018448	0.01645	0.0205144	0.0205841				128	152.2
64	103.591	128.1	154.408	173.317	171.741	172.169	177.792		64	0.972643	0.975195	0.97629	0.974465	0.969994	0.966799	0.971775			64	158.955	179.392	208.45	222.592	219.289	220.256	219.15		64	4.24349	5.93339	6.14653	2.23819	1.93144	2.31045	2.97735		64	0.0398432	0.0451695	0.0388632	0.0125841	0.0109088	0.0129741	0.0162736				64	159.6
0	106.505	131.358	158.158	177.858	177.054	178.081	182.956		0	1	1	1	1	1	1	1			0	161.868	182.65	212.2	227.133	224.602	226.169	224.313		0	4.36637	6.52268	6.49889	1.1611	1.85953	1.23898	2.45875		0	0.0409971	0.0496557	0.041091	0.00652822	0.0105027	0.00695739	0.013439				0	161.2
-64	104.323	128.242	152.267	170.192	171.065	172.031	175.79		-64	0.979514	0.976274	0.962748	0.956895	0.966177	0.966027	0.960832			-64	159.686	179.533	206.308	219.467	218.614	220.119	217.147		-64	4.28132	6.30532	6.65038	1.49195	2.61966	1.21636	2.39393		-64	0.0401985	0.0480009	0.0420489	0.00838844	0.0147959	0.00683035	0.0130848				-64	156.2
-128	96.9045	118.65	137.483	150.592	153.345	153.931	157.001		-128	0.909863	0.903254	0.869277	0.846694	0.866096	0.864388	0.858135			-128	152.268	169.942	191.525	199.867	200.894	202.019	198.358		-128	4.03436	5.71903	7.34455	3.03706	3.41797	2.15241	3.03565		-128	0.0378797	0.0435376	0.046438	0.0170757	0.0193047	0.0120867	0.0165922				-128	146
-192	84.6091	103.733	116.3	122.1	126.892	126.769	129.383		-192	0.794418	0.789697	0.735339	0.686501	0.716688	0.711859	0.707182			-192	139.973	155.025	170.342	171.375	174.441	174.856	170.741		-192	3.64188	5.2302	8.8498	4.30368	3.92609	3.25148	4.16639		-192	0.0341946	0.0398163	0.0559553	0.0241972	0.0221746	0.0182584	0.0227726				-192	131.8
-256	69.2455	85.35	92.4333	90.3333	96.221	95.325	97.9824		-256	0.650164	0.649749	0.584435	0.507895	0.543457	0.535289	0.535552			-256	124.609	136.642	146.475	139.608	143.77	143.412	139.34		-256	3.36367	5.0696	10.5513	4.97193	4.02436	3.96052	5.0346		-256	0.0315824	0.0385937	0.0667135	0.0279544	0.0227296	0.0222399	0.0275181				-256	115.4
-320	52.5636	65.6417	69.225	60.5583	66.6827	65.2062	67.8951		-320	0.493534	0.499715	0.437694	0.340486	0.376625	0.36616	0.371101			-320	107.927	116.933	123.267	109.833	114.231	113.294	109.253		-320	3.09577	5.06944	11.5515	4.9467	3.61496	4.17514	5.22183		-320	0.0290671	0.0385925	0.0730375	0.0278126	0.0204173	0.0234451	0.0285415				-320	99
-384	36.9318	46.925	48.9417	36.4667	42.3	40.2688	42.6844		-384	0.346763	0.357229	0.309447	0.205032	0.238911	0.226126	0.233304			-384	92.2955	98.2167	102.983	85.7417	89.8486	88.3563	84.042		-384	2.91137	5.06537	11.2589	4.28045	2.92412	3.89914	4.59503		-384	0.0273356	0.0385615	0.0711877	0.0240666	0.0165155	0.0218953	0.0251155				-384	84
-448	23.6318	31.05	32.6417	19.4833	24.4973	22.1812	23.8725		-448	0.221886	0.236376	0.206386	0.109544	0.138361	0.124557	0.130482			-448	78.9955	82.3417	86.6833	68.7583	72.0459	70.2687	65.2301		-448	2.66375	4.91608	9.77987	3.44106	2.29194	3.45689	3.64527		-448	0.0250107	0.037425	0.0618359	0.0193472	0.0129449	0.0194119	0.0199243				-448	72.4
-512	13.6273	18.8667	20.5583	8.775	12.7683	10.875	11.2987		-512	0.12795	0.143627	0.129986	0.049337	0.0721154	0.0610676	0.0617567			-512	68.9909	70.1583	74.6	58.05	60.3169	58.9625	52.6564		-512	2.42694	4.63349	7.62831	2.68201	1.84375	3.0286	2.67706		-512	0.0227872	0.0352737	0.0482321	0.0150795	0.0104135	0.0170068	0.0146323				-512	64.2
-576	6.87273	10.4833	12.0333	2.69167	6.00129	4.84375	3.83688		-576	0.0645299	0.0798071	0.0760841	0.0151338	0.0338953	0.0271997	0.0209716			-576	62.2364	61.775	66.075	51.9667	53.5499	52.9312	45.1945		-576	2.24851	4.23864	5.51938	2.24965	1.66283	2.79697	1.99321		-576	0.0211119	0.0322678	0.0348978	0.0126486	0.00939166	0.0157061	0.0108945				-576	59.4
-640	3.00455	5.28333	6.80833	-0.116667	2.35886	2.1875	0		-640	0.0282105	0.0402208	0.0430476	-0.000655953	0.0133228	0.0122837	0			-640	58.3682	56.575	60.85	49.1583	49.9074	50.275	41.3576		-640	2.16801	3.57149	4.04487	2.17672	1.65229	2.62842	1.61507		-640	0.020356	0.0271889	0.0255748	0.0122385	0.00933217	0.0147597	0.00882765				-640	56.8
-704	1	2.25833	3.75833	-1.33333	0.527143	1.3375	-1.47362		-704	0.00938927	0.0171922	0.0237631	-0.0074966	0.00297731	0.00751062	-0.00805454			-704	56.3636	53.55	57.8	47.9417	48.0757	49.425	39.884		-704	2.04632	2.84954	3.30185	2.32977	1.65467	2.48156	1.5213		-704	0.0192135	0.0216929	0.0208769	0.013099	0.00934559	0.013935	0.00831512				-704	55.4
-768	0.240909	0.675	1.75	-1.81667	-0.159571	1.175	-1.75112		-768	0.00226196	0.00513862	0.0110649	-0.0102141	-0.000901261	0.00659811	-0.0095713			-768	55.6045	51.9667	55.7917	47.4583	47.389	49.2625	39.6065		-768	1.94731	2.0019	3.24029	2.3675	1.64581	2.26301	1.58045		-768	0.0182838	0.01524	0.0204877	0.0133112	0.00929557	0.0127078	0.0086384				-768	55.4
-832	0	0.116667	0.566667	-1.84167	-0.438571	1.15625	-1.20025		-832	0	0.000888156	0.00358291	-0.0103547	-0.00247705	0.00649282	-0.00656032			-832	55.3636	51.4083	54.6083	47.4333	47.11	49.2437	40.1574		-832	1.77114	1.31426	3.42962	2.27323	1.74323	2.09298	1.729		-832	0.0166297	0.0100052	0.0216847	0.0127811	0.00984579	0.011753	0.00945037				-832	54.8
-896	0.0272727	-0.1	0	-1.68333	-0.198857	0.9125	-0.463125		-896	0.000256071	-0.000761276	0	-0.00946446	-0.00112315	0.00512407	-0.00253135			-896	55.3909	51.1917	54.0417	47.5917	47.3497	49	40.8945		-896	1.51558	1.12203	3.59603	2.05468	1.92393	1.83943	1.88918		-896	0.0142302	0.00854173	0.0227369	0.0115524	0.0108664	0.0103292	0.0103259				-896	55
-960	0.1	0.125	-0.341667	-0.966667	0.566571	0.45625	0.16125		-960	0.000938927	0.000951596	-0.00216028	-0.00543504	0.0032	0.00256203	0.00088136			-960	55.4636	51.4167	53.7	48.3083	48.1151	48.5437	41.5189		-960	1.25122	1.43264	3.67839	1.77554	2.09849	1.57501	1.96812		-960	0.011748	0.0109063	0.0232576	0.00998291	0.0118523	0.00884434	0.0107574				-960	55.8
-1024	0.3	0.433333	-0.641667	-0.366667	1.388	0	0.667625		-1024	0.00281678	0.00329886	-0.00405712	-0.00206157	0.00783944	0	0.0036491			-1024	55.6636	51.725	53.4	48.9083	48.9366	48.0875	42.0252		-1024	0.96351	1.89113	3.70735	1.81117	2.13071	1.33155	1.98767		-1024	0.00904665	0.0143967	0.0234408	0.0101832	0.0120343	0.00747721	0.0108642				-1024	56.8
-1088	0.463636	0.425	-0.841667	0.125	2.12757	-0.6875	0.792375		-1088	0.00435321	0.00323542	-0.00532167	0.000702807	0.0120165	-0.0038606	0.00433096			-1088	55.8273	51.7167	53.2	49.4	49.6761	47.4	42.15		-1088	0.793657	2.25172	3.67	1.96186	2.06658	1.18378	1.98966		-1088	0.00745186	0.0171418	0.0232046	0.0110305	0.011672	0.0066474	0.0108751				-1088	58.6
-1152	0.690909	0.258333	-1.34167	0.566667	2.35129	-1.56875	0.778875		-1152	0.00648713	0.00196663	-0.00848306	0.00318606	0.0132801	-0.00880918	0.00425717			-1152	56.0545	51.55	52.7	49.8417	49.8999	46.5187	42.1365		-1152	0.842234	2.41244	3.50927	2.08495	2.02374	1.19111	1.92541		-1152	0.00790796	0.0183653	0.0221884	0.0117225	0.0114301	0.00668858	0.0105239				-1152	60.8
-1216	0.790909	-0.241667	-1.88333	0.841667	2.47757	-2.425	0.480125		-1216	0.00742606	-0.00183975	-0.0119079	0.00473223	0.0139933	-0.0136174	0.00262427			-1216	56.1545	51.05	52.1583	50.1167	50.0261	45.6625	41.8377		-1216	1.05222	2.63246	3.31726	1.96673	1.89048	1.32349	1.91168		-1216	0.00987958	0.0200403	0.0209743	0.0110578	0.0106774	0.00743193	0.0104488				-1216	62.2
-1280	0.540909	-0.983333	-2.325	0.558333	2.02543	-3.05625	0.063625		-1280	0.00507874	-0.00748588	-0.0147005	0.0031392	0.0114396	-0.0171621	0.000347761			-1280	55.9045	50.3083	51.7167	49.8333	49.574	45.0312	41.4213		-1280	1.33262	2.48625	3.12716	1.76094	1.73386	1.47502	1.90187		-1280	0.0125124	0.0189272	0.0197723	0.00990083	0.00979284	0.00828288	0.0103952				-1280	63.2
-1344	0.177273	-1.99167	-2.50833	0.35	1.29771	-3.375	-0.497375		-1344	0.00166446	-0.0151621	-0.0158596	0.00196786	0.0073295	-0.018952	-0.00271855			-1344	55.5409	49.3	51.5333	49.625	48.8463	44.7125	40.8603		-1344	1.56712	2.24734	2.90198	1.58726	1.50388	1.5942	1.9442		-1344	0.0147141	0.0171085	0.0183486	0.00892432	0.00849392	0.00895208	0.0106266				-1344	64.2
-1408	-0.286364	-2.83333	-1.93333	-0.116667	0.506286	-3.2625	-1.05075		-1408	-0.00268875	-0.0215695	-0.012224	-0.000655953	0.00285951	-0.0183203	-0.00574319			-1408	55.0773	48.4583	52.1083	49.1583	48.0549	44.825	40.3069		-1408	1.72051	1.83335	2.72912	1.73199	1.37321	1.65203	1.96278		-1408	0.0161543	0.0139569	0.0172556	0.00973802	0.00775588	0.00927686	0.0107282				-1408	65
-1472	-0.593636	-3.2	-1.03333	-0.5	-0.032	-3.075	-1.25287		-1472	-0.00557381	-0.0243608	-0.00653354	-0.00281123	-0.000180736	-0.0172674	-0.00684796			-1472	54.77	48.0917	53.0083	48.775	47.5166	45.0125	40.1047		-1472	1.91594	1.40744	2.57014	1.95987	1.3646	1.676	1.97926		-1472	0.0179892	0.0107145	0.0162504	0.0110193	0.00770729	0.00941142	0.0108182				-1472	65
-1536	-1.33864	-3.30833	0.05	-0.716667	-0.306714	-2.65	-1.22487		-1536	-0.0125688	-0.0251856	0.000316139	-0.00402942	-0.00173232	-0.0148808	-0.00669492			-1536	54.025	47.9833	54.0917	48.5583	47.2419	45.4375	40.1327		-1536	1.9767	1.02209	2.38893	2.03833	1.48467	1.68923	1.99286		-1536	0.0185598	0.00778096	0.0151047	0.0114604	0.00838542	0.00948572	0.0108926				-1536	64.8
-1600	-2.00364	-2.96667	1.04167	-0.608333	-0.267	-2.13125	-1.044		-1600	-0.0188127	-0.0225845	0.00658623	-0.00342033	-0.00150802	-0.0119679	-0.00570629			-1600	53.36	48.325	55.0833	48.6667	47.2816	45.9562	40.3136		-1600	1.99594	0.986418	2.36296	1.96789	1.55832	1.74728	2.02564		-1600	0.0187405	0.00750937	0.0149405	0.0110644	0.00880139	0.00981173	0.0110718				-1600	64.4
-1664	-2.60364	-2.15	1.425	0	-0.0931429	-1.275	-0.565375		-1664	-0.0244462	-0.0163674	0.00900996	0	-0.000526072	-0.00715965	-0.00309023			-1664	52.76	49.1417	55.4667	49.275	47.4554	46.8125	40.7922		-1664	1.86066	1.35074	2.33793	1.77427	1.56842	1.85962	2.11602		-1664	0.0174702	0.0102829	0.0147822	0.00997573	0.00885847	0.0104425	0.0115657				-1664	62.2
-1728	-3.04364	-1.08333	1.38333	0.741667	0.0747143	-0.3125	-0.016125		-1728	-0.0285775	-0.00824716	0.00874651	0.00416999	0.000421987	-0.00175482	-8.8136e-05			-1728	52.32	50.2083	55.425	50.0167	47.6233	47.775	41.3415		-1728	1.75813	1.82256	2.39605	1.75221	1.39193	1.94639	2.30511		-1728	0.0165075	0.0138747	0.0151497	0.0098517	0.00786163	0.0109298	0.0125993				-1728	60.2
-1792	-3.33364	-0.433333	0.833333	1.45833	0	0.80625	0.6135		-1792	-0.0313004	-0.00329886	0.00526898	0.00819941	0	0.00452743	0.00335327			-1792	52.03	50.8583	54.875	50.7333	47.5486	48.8938	41.9711		-1792	1.67805	2.19128	2.52448	1.8617	1.2188	2.0497	2.48421		-1792	0.0157557	0.0166817	0.0159618	0.0104673	0.00688379	0.0115099	0.0135782				-1792	58.4
-1856	-3.53864	0	0.491667	2.05	-0.438286	1.84375	1.12438		-1856	-0.0332252	0	0.0031087	0.011526	-0.00247544	0.0103534	0.00614561			-1856	51.825	51.2917	54.5333	51.325	47.1103	49.9312	42.482		-1856	1.4783	2.2764	2.75547	1.94942	1.18175	2.14989	2.54825		-1856	0.0138801	0.0173297	0.0174222	0.0109605	0.00667452	0.0120725	0.0139282				-1856	56.4
-1920	-3.62864	0.025	0.116667	2.3	-0.818	2.6375	1.5425		-1920	-0.0340702	0.000190319	0.000737657	0.0129316	-0.00462007	0.0148107	0.00843099			-1920	51.735	51.3167	54.1583	51.575	46.7306	50.725	42.9001		-1920	1.36766	2.16723	3.01382	1.90612	1.24339	2.33042	2.56289		-1920	0.0128414	0.0164986	0.0190557	0.0107171	0.00702266	0.0130863	0.0140082				-1920	55.4
-1984	-3.66364	0.468333	-0.208333	2.31667	-1.01	2.96875	1.53563		-1984	-0.0343989	0.00356531	-0.00131725	0.0130253	-0.00570449	0.0166708	0.00839342			-1984	51.7	51.76	53.8333	51.5917	46.5386	51.0562	42.8933		-1984	1.39074	2.15362	3.33114	1.83047	1.3417	2.46794	2.45826		-1984	0.013058	0.016395	0.021062	0.0102917	0.00757792	0.0138585	0.0134363				-1984	54.8
-2048	-3.47864	0.468333	-0.45	2.26667	-0.922429	2.9125	1.26688		-2048	-0.0326619	0.00356531	-0.00284525	0.0127442	-0.00520988	0.0163549	0.00692448			-2048	51.885	51.76	53.5917	51.5417	46.6261	51	42.6245		-2048	1.63802	1.82375	3.57321	1.60297	1.51325	2.52362	2.27746		-2048	0.0153798	0.0138838	0.0225926	0.0090126	0.00854683	0.0141712	0.0124482				-2048	55
-2112	-2.95364	0.628333	-0.95	2.09167	-0.557	2.40625	0.873375		-2112	-0.0277325	0.00478335	-0.00600664	0.0117603	-0.00314594	0.0135121	0.00477369			-2112	52.41	51.92	53.0917	51.3667	46.9916	50.4937	42.231		-2112	1.89603	1.53112	3.7032	1.37066	1.64753	2.41589	2.10864		-2112	0.0178024	0.011656	0.0234145	0.00770646	0.00930528	0.0135662	0.0115254				-2112	55.2
-2176	-2.36864	1.02833	-1.81667	2.15	0.300429	1.725	0.374		-2176	-0.0222398	0.00782846	-0.0114864	0.0120883	0.00169682	0.00968659	0.00204421			-2176	52.995	52.32	52.225	51.425	47.849	49.8125	41.7316		-2176	2.07471	1.34295	3.52522	1.20691	1.83098	2.16537	1.91255		-2176	0.01948	0.0102236	0.0222892	0.00678579	0.0103414	0.0121594	0.0104536				-2176	55.6
-2240	-1.70364	0.948333	-2.69167	2.2	1.01586	0.84375	0.156		-2240	-0.0159959	0.00721944	-0.0170188	0.0123694	0.00573757	0.00473801	0.000852665			-2240	53.66	52.24	51.35	51.475	48.5644	48.9312	41.5136		-2240	2.10981	1.55373	3.21332	1.33675	1.98948	1.81601	1.75429		-2240	0.0198096	0.0118282	0.0203171	0.00751583	0.0112366	0.0101976	0.00958858				-2240	56
-2304	-1.22364	0.908333	-3.33333	2.34167	1.77386	0.225	0.10075		-2304	-0.0114891	0.00691493	-0.0210759	0.0131659	0.0100188	0.00126347	0.000550679			-2304	54.14	52.2	50.7083	51.6167	49.3224	48.3125	41.4584		-2304	2.08413	1.9041	2.71176	1.91665	2.15012	1.55816	1.69889		-2304	0.0195684	0.0144955	0.0171459	0.0107763	0.0121439	0.00874973	0.00928578				-2304	55.4
-2368	-0.813636	0.628333	-3.65833	2.50833	2.23171	-0.18125	0.303125		-2368	-0.00763945	0.00478335	-0.0231308	0.014103	0.0126047	-0.00101779	0.00165682			-2368	54.55	51.92	50.3833	51.7833	49.7803	47.9062	41.6608		-2368	2.13167	2.30589	2.21991	2.57988	2.31046	1.45936	1.67888		-2368	0.0200148	0.0175542	0.014036	0.0145053	0.0130495	0.00819489	0.00917644				-2368	54.6
-2432	-0.578636	0.308333	-3.76667	2.34167	2.32471	-0.16875	0.625125		-2432	-0.00543297	0.00234727	-0.0238158	0.0131659	0.01313	-0.000947601	0.00341681			-2432	54.785	51.6	50.275	51.6167	49.8733	47.9188	41.9828		-2432	2.1338	2.43442	1.75712	3.00392	2.44211	1.49133	1.78397		-2432	0.0200348	0.0185327	0.0111099	0.0168894	0.0137931	0.00837442	0.00975085				-2432	53.6
-2496	-0.298636	0.228333	-3.31667	1.99167	2.12457	-0.13125	1.02825		-2496	-0.00280398	0.00173825	-0.0209705	0.0111981	0.0119996	-0.000737023	0.00562021			-2496	55.065	51.52	50.725	51.2667	49.6731	47.9562	42.3859		-2496	2.09538	2.42164	1.5128	3.09288	2.47883	1.49155	1.99094		-2496	0.0196741	0.0184353	0.00956512	0.0173896	0.0140005	0.00837567	0.0108821				-2496	52.4
[truncated: 51 more columns]

## Sheet: Fig 1 Sup Fig 2 C
	Normalized background subtracted									absolute Difference between Mal3 and normalized background subtracted								Sum of absolute difference
Position	.125x normalized back subtract average	.25x normalized back subtract average	.5x normalized back subtract average	1x normalized back subtract average	2x normalized back subtract average	4x normalized back subtract average	8x normalized back subtract average		Mal3 from Beiling et al. 2007	.125x and Beiling absolute difference	.25x and Beiling absolute difference	.5x and Beiling absolute difference	1x and Beiling absolute difference	2x and Beiling absolute difference	4x and Beiling absolute difference	8x and Beiling absolute difference			0.125X	.25X	.5X	1X	2X	4X	8X
2048	0.0502326	0.104866	0.127878	0.113105	0.0779788	0.0508195	0.0557477		0.102589	0.0523568	0.00227646	0.0252888	0.0105156	0.0246105	0.0517699	0.0468416			2.11144	1.58609	1.18941	0.750476	0.848135	0.582498	0.619972
1856	0.0704195	0.135317	0.111966	0.120883	0.0810449	0.0733163	0.0598068		0.102682	0.0322623	0.032635	0.00928398	0.0182008	0.021637	0.0293656	0.0428751
1728	0.0849302	0.142486	0.0954739	0.124303	0.0863443	0.0835995	0.0659619		0.105966	0.0210358	0.0365196	0.010492	0.0183371	0.0196217	0.0223665	0.0400041
1536	0.113952	0.156379	0.0894673	0.135454	0.101147	0.0875303	0.0863624		0.0997169	0.0142347	0.0566619	0.0102496	0.0357373	0.00143003	0.0121866	0.0133546
1408	0.144509	0.172175	0.102587	0.149136	0.111697	0.0930755	0.106038		0.131596	0.0129134	0.0405794	0.0290089	0.0175396	0.0198994	0.0385205	0.0255581			On Rate	Sum of Absolute Edge
1216	0.209679	0.184229	0.158754	0.176123	0.130922	0.114309	0.123365		0.147586	0.0620931	0.0366425	0.011168	0.0285369	0.0166648	0.0332776	0.0242213			0.00029572	2.11144
1088	0.259272	0.196727	0.205121	0.184088	0.141963	0.133296	0.126544		0.160394	0.0988774	0.036332	0.044727	0.023694	0.0184318	0.0270986	0.0338503			0.00059144	1.58609
896	0.308267	0.234029	0.258233	0.192944	0.177269	0.16741	0.147242		0.163683	0.144584	0.0703458	0.0945496	0.0292606	0.013586	0.00372633	0.0164414			0.00118288	1.18941
704	0.343306	0.276534	0.303125	0.233191	0.265439	0.211526	0.199196		0.201913	0.141393	0.0746205	0.101211	0.0312781	0.0635263	0.00961252	0.00271754			0.00236576	0.750476
512	0.454654	0.370044	0.374888	0.338191	0.385384	0.300811	0.301992		0.306917	0.147737	0.0631268	0.067971	0.0312735	0.0784668	0.00610627	0.00492547			0.00473152	0.848135
448	0.511801	0.426822	0.421255	0.395774	0.436716	0.356754	0.360517		0.364176	0.147624	0.062646	0.0570788	0.0315975	0.0725398	0.007422	0.00365903			0.00946304	0.582498
384	0.57744	0.502062	0.487328	0.468491	0.50173	0.432036	0.437183		0.440493	0.136947	0.0615691	0.0468354	0.0279981	0.0612368	0.00845677	0.00330943			0.0189261	0.619972
320	0.653536	0.595889	0.574635	0.56084	0.582722	0.528761	0.535294		0.526328	0.127207	0.0695607	0.0483067	0.0345112	0.0563935	0.002433	0.00896524
256	0.738381	0.70158	0.681385	0.669868	0.68159	0.643281	0.65031		0.612146	0.126235	0.089434	0.069239	0.0577227	0.0694446	0.0311351	0.0381648
192	0.827323	0.810442	0.796196	0.78705	0.788903	0.766083	0.773646		0.691631	0.135692	0.118812	0.104565	0.095419	0.0972727	0.0744523	0.082015
128	0.909436	0.906934	0.901101	0.896266	0.892781	0.881094	0.888377		0.898243	0.011193	0.00869073	0.00285799	0.00197747	0.00546179	0.0171496	0.00986577
64	0.972643	0.975195	0.97629	0.974465	0.969994	0.966799	0.971775		0.965008	0.00763512	0.0101871	0.0112816	0.00945674	0.00498579	0.00179091	0.00676734
0	1	1	1	1	1	1	1		1	0	0	0	0	0	0	0
-64	0.979514	0.976274	0.962748	0.956895	0.966177	0.966027	0.960832		0.955549	0.0239655	0.0207248	0.00719953	0.00134576	0.0106277	0.010478	0.00528331
-128	0.909863	0.903254	0.869277	0.846694	0.866096	0.864388	0.858135		0.863436	0.0464268	0.0398183	0.00584036	0.0167417	0.00266001	0.00095154	0.0053017
-192	0.794418	0.789697	0.735339	0.686501	0.716688	0.711859	0.707182		0.761781	0.0326365	0.0279162	0.0264421	0.0752798	0.0450933	0.0499221	0.0545991
-256	0.650164	0.649749	0.584435	0.507895	0.543457	0.535289	0.535552		0.482201	0.167963	0.167548	0.102234	0.0256939	0.061256	0.0530884	0.0533509
-320	0.493534	0.499715	0.437694	0.340486	0.376625	0.36616	0.371101		0.329702	0.163832	0.170012	0.107992	0.010784	0.0469222	0.0364578	0.0413988
-384	0.346763	0.357229	0.309447	0.205032	0.238911	0.226126	0.233304		0.237576	0.109187	0.119653	0.0718714	0.0325438	0.00133488	0.0114501	0.00427165
-448	0.221886	0.236376	0.206386	0.109544	0.138361	0.124557	0.130482		0.148646	0.0732399	0.0877307	0.0577404	0.0391015	0.0102848	0.0240887	0.0181634
-512	0.12795	0.143627	0.129986	0.049337	0.0721154	0.0610676	0.0617567		0.0660802	0.06187	0.0775473	0.0639056	0.0167431	0.00603523	0.00501252	0.00432346
-704	0.00938927	0.0171922	0.0237631	-0.0074966	0.00297731	0.00751062	-0.00805454		0.0216891	0.0122998	0.0044969	0.00207405	0.0291857	0.0187117	0.0141784	0.0297436

## Sheet: Fig 1 Fig Sup 2 D,E
D	Background subtracted								E	normalized background subtracted									averages										std error									normalized std error
Position	.125x back subtract average	.25x back subtract average	.5x back subtract average	1x back subtract average	2x back subtract average	4x back subtract average	8x back subtract average		position	.125x normalized back subtract average	.25x normalized back subtract average	.5x normalized back subtract average	1x normalized back subtract average	2x normalized back subtract average	4x normalized back subtract average	8x normalized back subtract average			position	.125x average	.25x average	.5x average	1x average	2x average	4x average	8x average			Position	.125x std error	.25x std error	.5x std error	1x std error	2x std error	4x std error	8x std error	0	position	.125x normalized standard error	.25x normalized standard error	.5x normalized standard error	1x normalized standard error	2x normalized standard error	4x normalized standard error	8x normalized standard error
2496	-2.73667	-2.33737	2.81818	-1.55	8.875	16.9143	15.4		2496	-0.0181124	-0.0143654	0.0170573	-0.00917839	0.0490603	0.0892642	0.0793133			2496	51.3833	52.0444	55.2	50.5	56.85	55.1143	48.9			2496	1.24777	1.52664	1.91081	2.76596	4.84468	9.47838	12.0056		2496	0.00825825	0.00938267	0.0115654	0.0163788	0.026781	0.0500216	0.0618315
2432	-1.87714	-2.67071	3.15818	-0.15	11.45	18.2	18.9333		2432	-0.0124237	-0.016414	0.0191152	-0.000888231	0.0632946	0.0960495	0.0975107			2432	52.2429	51.7111	55.54	51.9	59.425	56.4	52.4333			2432	1.32252	1.60065	1.96123	2.8828	5.28872	9.43982	13.2629		2432	0.00875298	0.0098375	0.0118706	0.0170706	0.0292356	0.0498181	0.0683069
2368	-1.79143	-2.82626	2.87273	1.18333	14.225	19.7143	22.2333		2368	-0.0118564	-0.01737	0.0173875	0.00700716	0.0786346	0.104041	0.114506			2368	52.3286	51.5556	55.2545	53.2333	62.2	57.9143	55.7333			2368	1.54624	1.89549	1.91835	3.10033	5.84872	9.3903	14.3744		2368	0.0102337	0.0116495	0.011611	0.0183587	0.0323312	0.0495568	0.0740313
2304	-0.573333	-2.9596	3.01818	4.26429	17.05	21.2286	25.4		2304	-0.00379456	-0.0181895	0.0182679	0.0252511	0.094251	0.112033	0.130815			2304	53.5467	51.4222	55.4	56.3143	65.025	59.4286	58.9			2304	1.9478	2.14521	1.95182	3.34441	6.40453	9.31722	15.3939		2304	0.0128914	0.0131843	0.0118136	0.0198041	0.0354037	0.0491711	0.079282
2240	-0.386667	-2.93737	3.49091	4.97857	19.625	22.6286	28.0667		2240	-0.00255912	-0.0180529	0.0211291	0.0294808	0.108485	0.119421	0.144549			2240	53.7333	51.4444	55.8727	57.0286	67.6	60.8286	61.5667			2240	1.9769	2.29993	1.95575	3.2847	6.79191	9.25762	16.2493		2240	0.013084	0.0141352	0.0118374	0.0194505	0.0375451	0.0488566	0.0836872
2176	-0.08	-2.64182	3.85455	4.025	22.05	24.0857	29.9667		2176	-0.000529474	-0.0162365	0.02333	0.0238342	0.121891	0.127111	0.154335			2176	54.04	51.74	56.2364	56.075	70.025	62.2857	63.4667			2176	1.91687	2.04549	1.98187	3.10241	7.07164	9.09567	16.865		2176	0.0126866	0.0125715	0.0119955	0.018371	0.0390914	0.0480019	0.0868584
2112	0.293333	-2	4.49091	4.2	24.05	25.2857	31.1333		2112	0.0019414	-0.0122919	0.0271817	0.0248705	0.132946	0.133444	0.160343			2112	54.4133	52.3818	56.8727	56.25	72.025	63.4857	64.6333			2112	1.87365	1.79079	2.08644	3.07342	7.12991	8.91793	17.3043		2112	0.0124006	0.0110061	0.0126284	0.0181994	0.0394135	0.0470639	0.0891208
2048	0.533333	-1.25455	5.29091	4.7	25.675	26.1714	31.9333		2048	0.00352983	-0.00771036	0.0320238	0.0278312	0.141929	0.138118	0.164464			2048	54.6533	53.1273	57.6727	56.75	73.65	64.3714	65.4333			2048	1.8516	1.54712	2.18806	3.08236	6.92944	8.69768	17.6243		2048	0.0122547	0.00950848	0.0132435	0.0182523	0.0383054	0.0459015	0.0907687
1984	0.773333	-0.563636	6.01818	5.975	27	27.1429	32.4		1984	0.00511825	-0.00346407	0.0364257	0.0353812	0.149254	0.143245	0.166867			1984	54.8933	53.8182	58.4	58.025	74.975	65.3429	65.9			1984	1.84943	1.38718	2.26113	3.11898	6.6148	8.47582	17.7854		1984	0.0122403	0.00852552	0.0136857	0.0184692	0.036566	0.0447307	0.0915985
1920	0.706667	-0.254545	7.09091	8.075	28.05	28.1714	33.0667		1920	0.00467702	-0.00156442	0.0429185	0.0478164	0.155058	0.148673	0.1703			1920	54.8267	54.1273	59.4727	60.125	76.025	66.3714	66.5667			1920	1.83282	1.31972	2.19425	3.06267	6.22098	8.35336	17.9537		1920	0.0121304	0.00811093	0.0132809	0.0181357	0.034389	0.0440844	0.0924656
1856	0.72	-0.145455	8.07273	10.525	29	29.3143	33.8667		1856	0.00476527	-0.000893955	0.048861	0.0623242	0.16031	0.154704	0.174421			1856	54.84	54.2364	60.4545	62.575	76.975	67.5143	67.3667			1856	1.78967	1.38679	2.04965	3.14532	5.7251	8.34969	18.0355		1856	0.0118448	0.00852312	0.0124057	0.0186251	0.0316479	0.044065	0.0928869
1792	0.746667	-0.127273	9.12727	13.275	30.075	30.6571	35.4333		1792	0.00494176	-0.00078221	0.0552438	0.0786084	0.166252	0.161791	0.182489			1792	54.8667	54.2545	61.5091	65.325	78.05	68.8571	68.9333			1792	1.74729	1.51119	1.81297	3.30207	5.23757	8.4814	18.0992		1792	0.0115643	0.00928768	0.0109732	0.0195533	0.0289529	0.0447601	0.0932145
1728	0.666667	-0.254545	10.2	15.875	31.275	31.8857	37.5667		1728	0.00441228	-0.00156442	0.0617365	0.0940044	0.172886	0.168275	0.193476			1728	54.7867	54.1273	62.5818	67.925	79.25	70.0857	71.0667			1728	1.69406	1.59923	1.5916	3.52206	4.73917	8.69913	18.0498		1728	0.011212	0.00982877	0.00963333	0.020856	0.0261977	0.0459092	0.0929603
1664	0.64	-0.290909	11.0909	18.275	32.55	33.2	40.0667		1664	0.00423579	-0.00178791	0.0671289	0.108216	0.179934	0.175211	0.206352			1664	54.76	54.0909	63.4727	70.325	80.525	71.4	73.5667			1664	1.67737	1.66845	1.46073	3.63987	4.42873	8.87528	17.9775		1664	0.0111016	0.0102542	0.00884122	0.0215536	0.0244817	0.0468388	0.0925882
1600	0.666667	-0.218182	11.5091	20.05	34	34.8286	43.0333		1600	0.00441228	-0.00134093	0.06966	0.118727	0.187949	0.183806	0.221631			1600	54.7867	54.1636	63.8909	72.1	81.975	73.0286	76.5333			1600	1.65435	1.70809	1.56435	3.47904	4.25139	8.87182	18.0905		1600	0.0109492	0.0104978	0.00946837	0.0206013	0.0235013	0.0468205	0.0931699
1536	0.733333	0.0545455	11.7273	21.775	35.575	36.8857	46.0333		1536	0.00485351	0.000335233	0.0709805	0.128942	0.196656	0.194662	0.237082			1536	54.8533	54.4364	64.1091	73.825	83.55	75.0857	79.5333			1536	1.64173	1.69136	1.80016	3.23041	4.19624	8.58388	18.4288		1536	0.0108657	0.010395	0.0108956	0.019129	0.0231965	0.0453009	0.0949124
1472	0.733333	0.472727	11.7273	23.325	37.175	39.6571	49.3333		1472	0.00485351	0.00290535	0.0709805	0.13812	0.2055	0.209288	0.254077			1472	54.8533	54.8545	64.1091	75.375	85.15	77.8571	82.8333			1472	1.58823	1.56956	2.00485	2.93032	4.15327	7.72884	18.5597		1472	0.0105116	0.00964644	0.0121345	0.017352	0.022959	0.0407885	0.0955862
1408	0.88	0.872727	11.8	24.675	38.75	43.5143	53		1408	0.00582421	0.00536373	0.0714207	0.146114	0.214207	0.229644	0.272961			1408	55	55.2545	64.1818	76.725	86.725	81.7143	86.5			1408	1.55034	1.41307	2.07981	2.87401	4.00857	6.3235	18.2969		1408	0.0102608	0.00868461	0.0125882	0.0170186	0.0221591	0.0333719	0.0942331
1344	1.04	1.63636	11.8545	26.2	40.375	48.3429	57.4		1344	0.00688316	0.010057	0.0717509	0.155144	0.22319	0.255127	0.295622			1344	55.16	56.0182	64.2364	78.25	88.35	86.5429	90.9			1344	1.4868	1.21627	1.98004	2.90145	3.81129	4.6112	17.3266		1344	0.00984024	0.00747511	0.0119844	0.0171811	0.0210685	0.0243354	0.0892356
1280	1.37333	2.63636	12	27.775	42.025	53.5429	62.6333		1280	0.0090893	0.0162029	0.0726312	0.164471	0.232311	0.282569	0.322575			1280	55.4933	57.0182	64.3818	79.825	90	91.7429	96.1333			1280	1.41118	1.11502	1.79834	3.04455	3.5426	2.82748	15.6363		1280	0.00933977	0.00685286	0.0108846	0.0180284	0.0195832	0.0149219	0.0805305
1216	2.13333	4.01818	12.5818	29.325	43.575	58.4857	68.8667		1216	0.0141193	0.0246955	0.0761527	0.173649	0.240879	0.308655	0.354678			1216	56.2533	58.4	64.9636	81.375	91.55	96.6857	102.367			1216	1.31878	1.1372	1.60738	3.10069	3.21029	1.99872	13.2665		1216	0.00872827	0.00698916	0.00972885	0.0183609	0.0177462	0.0105481	0.0683255
1152	3.05333	5.70909	13.5455	31	45.1	62.9714	75.6		1152	0.0202083	0.0350877	0.0819853	0.183568	0.249309	0.332328	0.389356			1152	57.1733	60.0909	65.9273	83.05	93.075	101.171	109.1			1152	1.25714	1.40398	1.52169	3.23878	2.93959	2.58486	10.4616		1152	0.00832028	0.00862875	0.00921021	0.0191786	0.0162498	0.0136415	0.0538797
1088	3.96	7.38182	15	32.475	46.65	66.5429	82.3667		1088	0.026209	0.0453682	0.090789	0.192302	0.257877	0.351176	0.424206			1088	58.08	61.7636	67.3818	84.525	94.625	104.743	115.867			1088	1.2182	1.66198	1.57616	3.40421	2.73894	3.54371	7.67053		1088	0.00806258	0.0102145	0.00953985	0.0201582	0.0151406	0.0187017	0.0395049
1024	4.89333	8.96364	16.6727	34.075	48.25	69.2571	89		1024	0.0323862	0.05509	0.100913	0.201776	0.266722	0.365501	0.458369			1024	59.0133	63.3455	69.0545	86.125	96.225	107.457	122.5			1024	1.16657	1.89634	1.67433	3.67405	2.74213	4.32245	5.59121		1024	0.00772083	0.0116548	0.010134	0.0217561	0.0151583	0.0228115	0.0287959
960	5.86667	10.6182	18.9091	35.6	50	71.8857	94.9667		960	0.0388281	0.0652587	0.114449	0.210807	0.276396	0.379373	0.489099			960	59.9867	65	71.2909	87.65	97.975	110.086	128.467			960	1.1687	1.98274	1.70257	3.99949	2.80166	4.76567	4.89686		960	0.00773494	0.0121858	0.010305	0.0236832	0.0154873	0.0251505	0.0252199
896	6.8	12.1455	21.4	36.975	51.925	74.0857	100.267		896	0.0450053	0.0746452	0.129526	0.218949	0.287037	0.390983	0.516395			896	60.92	66.5273	73.7818	89.025	99.9	112.286	133.767			896	1.21528	2.02681	1.6742	4.19887	2.87837	4.91393	5.22333		896	0.00804324	0.0124566	0.0101333	0.0248638	0.0159114	0.025933	0.0269013
832	7.96	13.6727	24.3636	38.425	53.9	76.4286	104.9		832	0.0526827	0.0840317	0.147463	0.227535	0.297955	0.403347	0.540258			832	62.08	68.0545	76.7455	90.475	101.875	114.629	138.4			832	1.32609	2.0191	1.62605	4.30246	3.02096	4.92763	5.89896		832	0.00877661	0.0124092	0.00984181	0.0254772	0.0166996	0.0260053	0.0303809
768	9.33333	15.3818	27.2727	40.125	56.35	79.2	109.433		768	0.061772	0.0945357	0.165071	0.237602	0.311498	0.417973	0.563605			768	63.4533	69.7636	79.6545	92.175	104.325	117.4	142.933			768	1.45431	2.14466	1.5965	4.19619	3.17784	4.74991	6.5959		768	0.00962523	0.0131809	0.009663	0.0248479	0.0175668	0.0250674	0.0339703
704	10.8667	17.4545	30.7818	42.4	59.35	82.8	113.833		704	0.0719202	0.107275	0.18631	0.251073	0.328082	0.436972	0.586266			704	64.9867	71.8364	83.1636	94.45	107.325	121	147.333			704	1.54373	2.53854	1.54467	3.94869	3.36209	4.49871	7.19578		704	0.0102171	0.0156017	0.00934925	0.0233824	0.0185854	0.0237417	0.0370598
640	13.0133	20.3818	34.7818	45.5	63.225	87.5429	118.433		640	0.0861278	0.125265	0.210521	0.26943	0.349502	0.462002	0.609957			640	67.1333	74.7636	87.1636	97.55	111.2	125.743	151.933			640	1.70517	3.1318	1.54979	3.63073	3.73062	4.15549	7.46915		640	0.0112856	0.0192478	0.00938029	0.0214995	0.0206225	0.0219304	0.0384677
576	16.2133	24.7273	39.6182	50.05	68.725	93.4286	123.367		576	0.107307	0.151972	0.239793	0.296373	0.379906	0.493064	0.635365			576	70.3333	79.1091	92	102.1	116.7	131.629	156.867			576	2.10081	3.95314	1.65145	3.27089	4.16653	3.84589	7.46617		576	0.013904	0.0242958	0.00999554	0.0193687	0.0230322	0.0202965	0.0384524
512	21.2533	31.3636	46.1091	56.6	76.225	100.771	128.4		512	0.140664	0.192759	0.27908	0.335159	0.421365	0.531815	0.661288			512	75.3733	85.7455	98.4909	108.65	124.2	138.971	161.9			512	2.63284	4.80668	1.85051	3.16104	4.75763	3.7236	6.99964		512	0.0174253	0.0295416	0.0112004	0.0187182	0.0262998	0.0196511	0.0360497
448	29.6533	41.3091	55.2364	65.95	85.825	109.486	134.667		448	0.196258	0.253883	0.334324	0.390526	0.474433	0.577805	0.693562			448	83.7733	95.6909	107.618	118	133.8	147.686	168.167			448	3.20804	5.58797	2.11464	3.51834	5.10294	3.6045	6.45453		448	0.0212322	0.0343433	0.0127991	0.020834	0.0282086	0.0190225	0.0332422
384	42.4533	55.1091	67.5636	78.575	98.25	120.086	142.067		384	0.280974	0.338697	0.408936	0.465285	0.543118	0.633745	0.731674			384	96.5733	109.491	119.945	130.625	146.225	158.286	175.567			384	3.69041	6.03386	2.45463	3.90807	5.22296	3.47489	5.66047		384	0.0244247	0.0370838	0.0148569	0.0231418	0.0288721	0.0183385	0.0291526
320	60.24	73.4	83.7273	94.475	113.05	132.571	151		320	0.398694	0.451112	0.506768	0.559437	0.624931	0.699638	0.777682			320	114.36	127.782	136.109	146.525	161.025	170.771	184.5			320	4.03955	6.04055	2.75349	3.96862	4.97449	3.25951	4.79971		320	0.0267354	0.0371248	0.0166658	0.0235003	0.0274986	0.0172019	0.0247195
256	82.3733	95.4909	103.436	113.3	129.95	146.371	161.3		256	0.545182	0.586881	0.626059	0.67091	0.718353	0.772467	0.83073			256	136.493	149.873	155.818	165.35	177.925	184.571	194.8			256	4.16179	5.46933	2.98962	3.68947	4.32029	3.01274	3.82768		256	0.0275445	0.0336142	0.018095	0.0218473	0.0238822	0.0158996	0.0197134
192	106.547	119.4	125.145	133.425	147.875	160.857	172.133		192	0.705171	0.733825	0.757456	0.790081	0.817441	0.848914	0.886524			192	160.667	173.782	177.527	185.475	195.85	199.057	205.633			192	4.08547	4.6817	3.06581	3.15118	3.32768	2.50964	2.72291		192	0.0270394	0.0287734	0.0185561	0.0186598	0.0183951	0.0132445	0.0140236
128	129.213	141.6	145.564	151.9	164.25	174.257	182.367		128	0.855189	0.870265	0.881039	0.899482	0.90796	0.919632	0.939227			128	183.333	195.982	197.945	203.95	212.225	212.457	215.867			128	3.87542	3.9983	3.10383	2.74448	2.08939	1.80463	1.69815		128	0.0256492	0.0245733	0.0187863	0.0162516	0.01155	0.00952381	0.00874582
64	145.44	157.582	160.182	165	176.325	184.429	190.667		64	0.962584	0.968488	0.969517	0.977054	0.97471	0.973311	0.981974			64	199.56	211.964	212.564	217.05	224.3	222.629	224.167			64	3.62908	3.48852	3.05615	2.87092	0.890225	0.955695	0.849074		64	0.0240188	0.0214403	0.0184977	0.0170003	0.00492109	0.00504363	0.00437291
0	151.093	162.709	165.218	168.875	180.9	189.486	194.167		0	1	1	1	1	1	1	1			0	205.213	217.091	217.6	220.925	228.875	227.686	227.667			0	3.5552	3.02883	3.09518	3.60658	0.169328	0.2094	0.209054		0	0.0235298	0.018615	0.0187339	0.0213565	0.000936029	0.0011051	0.00107667
-64	144.133	154.964	157.982	161.475	175.5	187.486	190.567		-64	0.953936	0.952397	0.956201	0.956181	0.970149	0.989445	0.981459			-64	198.253	209.345	210.364	213.525	223.475	225.686	224.067			-64	3.59839	2.70819	3.31885	4.56425	0.396764	0.814017	0.850708		-64	0.0238157	0.0166443	0.0200877	0.0270274	0.00219328	0.00429593	0.00438133
-128	125.573	134.891	139.055	143.175	159.65	177	178.633		-128	0.831098	0.829031	0.841642	0.847816	0.882532	0.934107	0.92			-128	179.693	189.273	191.436	195.225	207.625	215.2	212.133			-128	3.80507	3.11873	3.61446	5.31877	0.830239	1.67527	2.18055		-128	0.0251835	0.0191675	0.0218769	0.0314953	0.00458949	0.00884114	0.0112303
-192	99.56	106.782	111.927	117.175	135.4	158.4	158.5		-192	0.65893	0.656274	0.677451	0.693856	0.74848	0.835947	0.816309			-192	153.68	161.164	164.309	169.225	183.375	196.6	192			-192	3.86132	3.87199	3.80989	5.68402	1.76792	2.57206	3.75026		-192	0.0255559	0.023797	0.0230598	0.0336581	0.00977292	0.0135739	0.0193146
-256	71.56	76.4727	81.8182	88.1	106.175	133.086	132.467		-256	0.473615	0.469997	0.495213	0.521688	0.586926	0.702352	0.682232			-256	125.68	130.855	134.2	140.15	154.15	171.286	165.967			-256	3.61099	4.25727	3.77657	5.62003	2.91435	3.26712	5.10869		-256	0.023899	0.0261649	0.0228581	0.0332792	0.0161103	0.017242	0.0263108
-320	46.52	48.9636	53.5818	60.4	76.875	104.086	103.933		-320	0.307889	0.300927	0.324309	0.357661	0.424959	0.549306	0.535279			-320	100.64	103.345	105.964	112.45	124.85	142.286	137.433			-320	3.01706	4.10934	3.49506	5.15325	3.899	3.74446	5.90431		-320	0.0199682	0.0252557	0.0211542	0.0305151	0.0215533	0.0197612	0.0304085
-384	27.4933	27.5818	31.0182	37.725	50.925	75.2286	76.5667		-384	0.181963	0.169516	0.187741	0.22339	0.281509	0.397014	0.394335			-384	81.6133	81.9636	83.4	89.775	98.9	113.429	110.067			-384	2.30558	3.50082	3.18799	4.38027	4.41631	3.82397	6.03521		-384	0.0152593	0.0215158	0.0192957	0.025938	0.024413	0.0201808	0.0310826
-448	14.9733	13.0545	15.0364	21.45	31.05	49.8571	52.6667		-448	0.0990999	0.0802324	0.0910091	0.127017	0.171642	0.263118	0.271245			-448	69.0933	67.4364	67.4182	73.5	79.025	88.0571	86.1667			-448	1.74283	2.86821	2.93696	3.52509	4.39139	3.41873	5.68652		-448	0.0115348	0.0176279	0.0177763	0.020874	0.0242752	0.0180421	0.0292868
-512	7.69333	4.54545	5.45455	11.15	17.275	30.2571	33.9		-512	0.0509178	0.0279361	0.0330142	0.0660252	0.0954947	0.15968	0.174592			-512	61.8133	58.9273	57.8364	63.2	65.25	68.4571	67.4			-512	1.50217	2.41924	2.77353	2.75363	4.09035	2.70048	4.9891		-512	0.00994202	0.0148685	0.016787	0.0163058	0.0226111	0.0142516	0.0256949
-576	3.97333	0.472727	0.727273	5.775	8.9	16.8	20.2333		-576	0.0262972	0.00290535	0.00440189	0.0341969	0.0491985	0.088661	0.104206			-576	58.0933	54.8545	53.1091	57.825	56.875	55	53.7333			-576	1.50411	2.17211	2.74869	2.28321	3.67337	1.99918	4.05399		-576	0.00995485	0.0133497	0.0166367	0.0135201	0.0203061	0.0105506	0.0208789
-640	2.44	-0.872727	-0.709091	3.8	4.7	8.65714	11.1333		-640	0.016149	-0.00536373	-0.00429185	0.0225019	0.0259812	0.0456876	0.0573391			-640	56.56	53.5091	51.6727	55.85	52.675	46.8571	44.6333			-640	1.60656	2.09452	2.65595	2.05388	3.33034	1.55955	3.10856		-640	0.0106329	0.0128728	0.0160754	0.0121622	0.0184098	0.00823042	0.0160098
-704	1.78667	-1.03636	-0.381818	3.625	2.725	3.97143	5.63333		-704	0.0118249	-0.00636943	-0.00231099	0.0214656	0.0150636	0.020959	0.0290129			-704	55.9067	53.3455	52	55.675	50.7	42.1714	39.1333			-704	1.68421	1.98808	2.53791	2.01027	3.08849	1.46046	2.24334		-704	0.0111468	0.0122186	0.015361	0.0119039	0.0170729	0.0077075	0.0115537
-768	1.54667	-0.727273	0.672727	4.2	1.85	1.71429	2.33333		-768	0.0102365	-0.00446977	0.00407175	0.0248705	0.0102266	0.00904704	0.0120172			-768	55.6667	53.6545	53.0545	56.25	49.825	39.9143	35.8333			-768	1.72064	1.9104	2.39298	2.1768	2.90827	1.43987	1.8058		-768	0.0113879	0.0117412	0.0144837	0.01289	0.0160767	0.00759885	0.00930028
-832	1.52	-0.454545	1.65455	4.85	1.225	0.714286	0.733333		-832	0.01006	-0.00279361	0.0100143	0.0287195	0.0067717	0.0037696	0.00377682			-832	55.64	53.9273	54.0364	56.9	49.2	38.9143	34.2333			-832	1.70011	1.89968	2.23567	2.50075	2.82113	1.48454	1.68353		-832	0.0112521	0.0116753	0.0135316	0.0148083	0.0155949	0.00783456	0.00867052
-896	1.53333	0	2.34545	5.025	0.675	0.257143	-0.333333		-896	0.0101483	0	0.0141961	0.0297557	0.00373134	0.00135706	-0.00171674			-896	55.6533	54.3818	54.7273	57.075	48.65	38.4571	33.1667			-896	1.59504	1.86423	2.11227	2.73517	2.68904	1.43411	1.6475		-896	0.0105567	0.0114574	0.0127847	0.0161964	0.0148648	0.00756844	0.00848498
-960	1.61333	0.527273	2.4	4.7	-0.175	0.142857	-0.833333		-960	0.0106777	0.00324059	0.0145262	0.0278312	-0.000967385	0.00075392	-0.00429185			-960	55.7333	54.9091	54.7818	56.75	47.8	38.3429	32.6667			-960	1.51328	1.83021	2.04922	2.88699	2.57924	1.36708	1.51853		-960	0.0100155	0.0112483	0.0124031	0.0170954	0.0142578	0.00721471	0.00782074
-1024	1.70667	1.16364	2.05455	3.625	-0.625	0	-1.23333		-1024	0.0112954	0.00715164	0.0124353	0.0214656	-0.00345495	0	-0.00635193			-1024	55.8267	55.5455	54.4364	55.675	47.35	38.2	32.2667			-1024	1.41483	1.75699	2.08494	2.90902	2.43817	1.37381	1.47774		-1024	0.00936392	0.0107983	0.0126193	0.0172259	0.013478	0.00725019	0.00761066
-1088	1.81333	2.25455	1.36364	2	-1.15	-0.0285714	-1.4		-1088	0.0120014	0.0138563	0.00825355	0.0118431	-0.0063571	-0.000150784	-0.0072103			-1088	55.9333	56.6364	53.7455	54.05	46.825	38.1714	32.1			-1088	1.34166	1.6486	2.06411	2.70318	2.33865	1.38058	1.4006		-1088	0.0088797	0.0101322	0.0124932	0.016007	0.0129279	0.00728594	0.00721337
-1152	1.53333	3.29091	0.618182	0.275	-1.4	0.0285714	-1.4		-1152	0.0101483	0.0202257	0.00374161	0.00162842	-0.00773908	0.000150784	-0.0072103			-1152	55.6533	57.6727	53	52.325	46.575	38.2286	32.1			-1152	1.28947	1.46412	2.06362	2.42898	2.32848	1.46771	1.34226		-1152	0.00853429	0.0089984	0.0124902	0.0143833	0.0128716	0.00774575	0.00691294
-1216	1.10667	4.07273	0	-1.1	-1.75	0.0857143	-1.13333		-1216	0.00732439	0.0250307	0	-0.00651369	-0.00967385	0.000452352	-0.00583691			-1216	55.2267	58.4545	52.3818	50.95	46.225	38.2857	32.3667			-1216	1.25799	1.33388	1.99345	2.12654	2.21908	1.59174	1.25911		-1216	0.00832589	0.00819794	0.0120656	0.0125924	0.0122669	0.00840033	0.00648471
-1280	0.573333	4.18182	-0.472727	-1.85	-1.825	0.2	-1		-1280	0.00379456	0.0257012	-0.00286123	-0.0109548	-0.0100884	0.00105549	-0.00515021			-1280	54.6933	58.5636	51.9091	50.2	46.15	38.4	32.5			-1280	1.24406	1.28097	1.98096	1.95544	2.04779	1.63433	1.16213		-1280	0.00823372	0.00787273	0.01199	0.0115792	0.01132	0.00862506	0.00598524
-1344	0	3.85455	-0.818182	-1.825	-1.7	0.485714	-0.6		-1344	0	0.0236898	-0.00495213	-0.0108068	-0.00939746	0.00256333	-0.00309013			-1344	54.12	58.2364	51.5636	50.225	46.275	38.6857	32.9			-1344	1.30786	1.31132	1.97937	1.89322	1.89504	1.58815	0.955394		-1344	0.008656	0.00805927	0.0119803	0.0112108	0.0104756	0.00838136	0.00492048
-1408	-0.466667	3.10909	-1.01818	-1.175	-1.45	0.4	0		-1408	-0.0030886	0.0191083	-0.00616265	-0.00695781	-0.00801548	0.00211098	0			-1408	53.6533	57.4909	51.3636	50.875	46.525	38.6	33.5			-1408	1.36684	1.42315	1.98837	1.93324	1.73779	1.57894	0.623164		-1408	0.00904634	0.00874661	0.0120348	0.0114478	0.00960637	0.00833278	0.00320943
-1472	-0.826667	2.12727	-1.10909	-0.5	-1.125	-0.0285714	0.5		-1472	-0.00547123	0.0130741	-0.00671289	-0.00296077	-0.00621891	-0.000150784	0.00257511			-1472	53.2933	56.5091	51.2727	51.55	46.85	38.1714	34			-1472	1.40651	1.49542	2.02827	1.95855	1.72328	1.45205	0.4		-1472	0.00930887	0.00919074	0.0122763	0.0115977	0.00952614	0.00766312	0.00206009
-1536	-0.866667	1.34545	-1.23636	0.05	-0.65	-0.8	1		-1536	-0.00573597	0.00826908	-0.00748322	0.000296077	-0.00359315	-0.00422195	0.00515021			-1536	53.2533	55.7273	51.1455	52.1	47.325	37.4	34.5			-1536	1.37914	1.51342	2.13094	1.93132	1.78428	1.24671	0.304594		-1536	0.00912775	0.00930136	0.0128977	0.0114364	0.00986338	0.00657944	0.00156873
-1600	-0.613333	0.581818	-1.27273	0.075	-0.2	-1.22857	1.3		-1600	-0.0040593	0.00357582	-0.00770331	0.000444115	-0.00110558	-0.00648372	0.00669528			-1600	53.5067	54.9636	51.1091	52.125	47.775	36.9714	34.8			-1600	1.34553	1.452	2.37262	1.74103	1.82601	1.08679	0.496655		-1600	0.00890527	0.00892391	0.0143605	0.0103096	0.010094	0.00573546	0.00255788
-1664	-0.386667	-0.0909091	-1.10909	0	0.275	-1.57143	1.33333		-1664	-0.00255912	-0.000558722	-0.00671289	0	0.00152018	-0.00829312	0.00686695			-1664	53.7333	54.2909	51.2727	52.05	48.25	36.6286	34.8333			-1664	1.38393	1.39902	2.64222	1.56555	1.78317	0.951414	0.688665		-1664	0.00915943	0.00859831	0.0159923	0.00927045	0.0098572	0.00502104	0.00354677
-1728	-0.186667	-0.527273	-0.872727	-0.375	0.6	-1.62857	1.3		-1728	-0.00123544	-0.00324059	-0.00528227	-0.00222058	0.00331675	-0.00859469	0.00669528			-1728	53.9333	53.8545	51.5091	51.675	48.575	36.5714	34.8			-1728	1.42032	1.44682	2.93785	1.42957	1.71953	1.02334	0.835331		-1728	0.00940027	0.00889206	0.0177817	0.00846526	0.00950544	0.00540063	0.00430213
-1792	-0.2	-0.781818	-0.454545	-0.85	0.725	-1.54286	0.8		-1792	-0.00132369	-0.00480501	-0.00275118	-0.00503331	0.00400774	-0.00814234	0.00412017			-1792	53.92	53.6	51.9273	51.2	48.7	36.6571	34.3			-1792	1.45557	1.56279	3.10364	1.30192	1.71901	1.17645	0.914998		-1792	0.00963358	0.00960481	0.0187851	0.00770938	0.00950255	0.00620862	0.00471244
-1856	-0.293333	-0.872727	0.0909091	-1.3	0.65	-1.34286	0.133333		-1856	-0.0019414	-0.00536373	0.000550237	-0.007698	0.00359315	-0.00708685	0.000686695			-1856	53.8267	53.5091	52.4727	50.75	48.625	36.8571	33.6333			-1856	1.43937	1.65612	3.13828	1.21076	1.79563	1.3617	0.929058		-1856	0.00952634	0.0101784	0.0189947	0.00716956	0.00992611	0.00718629	0.00478485
-1920	-0.76	-1	0.545455	-1.475	0.45	-1.11429	-0.5		-1920	-0.00503	-0.00614594	0.00330142	-0.00873427	0.00248756	-0.00588058	-0.00257511			-1920	53.36	53.3818	52.9273	50.575	48.425	37.0857	33			-1920	1.35571	1.75781	3.01536	1.19134	2.00326	1.43647	0.980929		-1920	0.00897264	0.0108034	0.0182508	0.00705458	0.0110738	0.00758088	0.005052
-1984	-1.14667	-1.18182	0.909091	-1.425	0.35	-0.742857	-1.16667		-1984	-0.00758913	-0.00726338	0.00550237	-0.00843819	0.00193477	-0.00392039	-0.00600858			-1984	52.9733	53.2	53.2909	50.625	48.325	37.4571	32.3333			-1984	1.22055	1.76729	2.8024	1.21318	2.22737	1.53155	1.08594		-1984	0.00807809	0.0108616	0.0169618	0.00718387	0.0123127	0.00808269	0.00559281
-2048	-1.45333	-1.45455	1.05455	-1.1	0	-0.4	-2.16667		-2048	-0.00961878	-0.00893955	0.00638274	-0.00651369	0	-0.00211098	-0.0111588			-2048	52.6667	52.9273	53.4364	50.95	47.975	37.8	31.3333			-2048	1.16232	1.74494	2.55476	1.37693	2.36708	1.63233	1.20339		-2048	0.00769274	0.0107243	0.015463	0.00815355	0.013085	0.00861451	0.00619772
-2112	-1.44	-1.8	0.818182	-0.8	-0.35	-0.0857143	-2.63333		-2112	-0.00953053	-0.0110627	0.00495213	-0.00473723	-0.00193477	-0.000452352	-0.0135622			-2112	52.68	52.5818	53.2	51.25	47.625	38.1143	30.8667			-2112	1.17572	1.65074	2.38826	1.57906	2.41465	1.7449	1.26725		-2112	0.00778145	0.0101453	0.0144552	0.00935048	0.013348	0.00920859	0.00652662
-2176	-1.18667	-2.29091	0.509091	-0.575	-0.8	-0.114286	-3.2		-2176	-0.00785387	-0.0140798	0.00308132	-0.00340489	-0.00442233	-0.000603136	-0.0164807			-2176	52.9333	52.0909	52.8909	51.475	47.175	38.0857	30.3			-2176	1.2373	1.56329	2.31222	1.83199	2.43758	1.69651	1.22724		-2176	0.00818896	0.00960789	0.0139949	0.0108482	0.0134747	0.00895322	0.00632053
-2240	-0.826667	-2.69091	0.0727273	-0.425	-1.225	0.0285714	-3.5		-2240	-0.00547123	-0.0165382	0.000440189	-0.00251665	-0.0067717	0.000150784	-0.0180258			-2240	53.2933	51.6909	52.4545	51.625	46.75	38.2286	30			-2240	1.29503	1.52519	2.2286	1.93308	2.40332	1.58071	1.1005		-2240	0.00857107	0.0093737	0.0134888	0.0114468	0.0132853	0.00834213	0.00566784
-2304	-0.56	-3.07273	-0.418182	-0.35	-1.725	-0.228571	-3.46667		-2304	-0.00370632	-0.0188848	-0.00253109	-0.00207254	-0.00953566	-0.00120627	-0.0178541			-2304	53.56	51.3091	51.9636	51.7	46.25	37.9714	30.0333			-2304	1.34583	1.47606	2.15542	1.83201	2.42687	1.37762	0.977999		-2304	0.00890731	0.00907177	0.0130459	0.0108483	0.0134155	0.00727032	0.0050369
-2368	-0.146667	-3.14545	-0.981818	-0.425	-2.05	-0.657143	-3.3		-2368	-0.000970702	-0.0193318	-0.00594256	-0.00251665	-0.0113322	-0.00346803	-0.0169957			-2368	53.9733	51.2364	51.4	51.625	45.925	37.5429	30.2			-2368	1.32944	1.41113	2.01302	1.5542	2.45381	1.19708	0.933333		-2368	0.00879882	0.00867271	0.012184	0.00920327	0.0135644	0.00631753	0.00480687
-2432	0.12	-3.01818	-1.58182	-0.425	-2.2	-1.17143	-2.9		-2432	0.000794211	-0.0185496	-0.00957412	-0.00251665	-0.0121614	-0.00618215	-0.0149356			-2432	54.24	51.3636	50.8	51.625	45.775	37.0286	30.6			-2432	1.35662	1.29916	1.81308	1.23006	2.42807	1.19142	0.933333		-2432	0.00897871	0.00798455	0.0109739	0.00728385	0.0134222	0.00628764	0.00480687
-2496	0.293333	-2.58182	-1.87273	-0.325	-2.125	-1.85714	-2.23333		-2496	0.0019414	-0.0158677	-0.0113349	-0.0019245	-0.0117468	-0.00980097	-0.0115021			-2496	54.4133	51.8	50.5091	51.725	45.85	36.3429	31.2667			-2496	1.47879	1.29513	1.6447	1.0994	2.39603	1.20252	1.02053		-2496	0.00978729	0.00795977	0.00995471	0.00651012	0.013245	0.00634625	0.00525595

## Sheet: Fig 1 Fig Sup 2 F
									absolute Difference between Mal3 and normalized background subtracted								Sum of absolute difference
Position	.125x normalized back subtract average	.25x normalized back subtract average	.5x normalized back subtract average	1x normalized back subtract average	2x normalized back subtract average	4x normalized back subtract average	8x normalized back subtract average	Mal3 from Beiling et al. 2007	.125x and Beiling absolute difference	.25x and Beiling absolute difference	.5x and Beiling absolute difference	1x and Beiling absolute difference	2x and Beiling absolute difference	4x and Beiling absolute difference	8x and Beiling absolute difference			0.125X	.25X	.5X	1X	2X	4X	8X
2048	0.00352983	-0.00771036	0.0320238	0.0278312	0.141929	0.138118	0.164464	0.102589	0.0990595	0.1103	0.0705656	0.0747581	0.0393399	0.0355288	0.0618742			2.08018	1.85571	0.948305	0.803924	1.81105	3.29618	4.34334
1856	0.00476527	-0.000893955	0.048861	0.0623242	0.16031	0.154704	0.174421	0.102682	0.0979166	0.103576	0.0538209	0.0403577	0.0576277	0.0520226	0.0717387
1728	0.00441228	-0.00156442	0.0617365	0.0940044	0.172886	0.168275	0.193476	0.105966	0.101554	0.10753	0.0442294	0.0119616	0.0669196	0.062309	0.0875104			On Rate	Sum of Absolute Lattice
1536	0.00485351	0.000335233	0.0709805	0.128942	0.196656	0.194662	0.237082	0.0997169	0.0948634	0.0993817	0.0287364	0.0292246	0.0969387	0.0949453	0.137365			5.85e-06	2.08018
1408	0.00582421	0.00536373	0.0714207	0.146114	0.214207	0.229644	0.272961	0.131596	0.125772	0.126232	0.0601753	0.014518	0.0826108	0.0980482	0.141365			1.17e-05	1.85571
1216	0.0141193	0.0246955	0.0761527	0.173649	0.240879	0.308655	0.354678	0.147586	0.133467	0.122891	0.0714337	0.0260627	0.0932925	0.161069	0.207092			2.34e-05	0.948305
1088	0.026209	0.0453682	0.090789	0.192302	0.257877	0.351176	0.424206	0.160394	0.134185	0.115026	0.0696054	0.0319075	0.0974828	0.190782	0.263812			4.68e-05	0.803924
896	0.0450053	0.0746452	0.129526	0.218949	0.287037	0.390983	0.516395	0.163683	0.118678	0.089038	0.0341575	0.0552657	0.123354	0.2273	0.352712			9.36e-05	1.81105
704	0.0719202	0.107275	0.18631	0.251073	0.328082	0.436972	0.586266	0.201913	0.129993	0.0946386	0.015603	0.0491602	0.126169	0.235059	0.384353			0.0001872	3.29618
512	0.140664	0.192759	0.27908	0.335159	0.421365	0.531815	0.661288	0.306917	0.166253	0.114158	0.027837	0.0282421	0.114448	0.224898	0.354371			0.0003744	4.34334
448	0.196258	0.253883	0.334324	0.390526	0.474433	0.577805	0.693562	0.364176	0.167918	0.110293	0.0298525	0.0263492	0.110257	0.213628	0.329386
384	0.280974	0.338697	0.408936	0.465285	0.543118	0.633745	0.731674	0.440493	0.159518	0.101796	0.0315569	0.0247923	0.102625	0.193253	0.291181
320	0.398694	0.451112	0.506768	0.559437	0.624931	0.699638	0.777682	0.526328	0.127634	0.0752166	0.0195605	0.033109	0.0986025	0.17331	0.251354
256	0.545182	0.586881	0.626059	0.67091	0.718353	0.772467	0.83073	0.612146	0.0669639	0.0252645	0.0139135	0.0587648	0.106207	0.160321	0.218584
192	0.705171	0.733825	0.757456	0.790081	0.817441	0.848914	0.886524	0.691631	0.0135406	0.0421944	0.0658251	0.0984508	0.12581	0.157284	0.194893
128	0.855189	0.870265	0.881039	0.899482	0.90796	0.919632	0.939227	0.898243	0.0430544	0.0279784	0.0172044	0.00123864	0.00971697	0.0213889	0.0409842
64	0.962584	0.968488	0.969517	0.977054	0.97471	0.973311	0.981974	0.965008	0.00242412	0.00348014	0.00450894	0.0120461	0.00970183	0.00830326	0.0169663
0	1	1	1	1	1	1	1	1	0	0	0	0	0	0	0
-64	0.953936	0.952397	0.956201	0.956181	0.970149	0.989445	0.981459	0.955549	0.00161301	0.00315186	0.000652395	0.000631835	0.0146005	0.0338963	0.0259105
-128	0.831098	0.829031	0.841642	0.847816	0.882532	0.934107	0.92	0.863436	0.0323384	0.034405	0.0217943	0.0156198	0.0190956	0.0706712	0.0565638
-192	0.65893	0.656274	0.677451	0.693856	0.74848	0.835947	0.816309	0.761781	0.102851	0.105507	0.0843299	0.0679248	0.0133014	0.0741657	0.0545278
-256	0.473615	0.469997	0.495213	0.521688	0.586926	0.702352	0.682232	0.482201	0.00858646	0.0122044	0.0130119	0.0394866	0.104725	0.220151	0.200031
-320	0.307889	0.300927	0.324309	0.357661	0.424959	0.549306	0.535279	0.329702	0.0218131	0.0287748	0.00539285	0.0279587	0.0952562	0.219604	0.205577
-384	0.181963	0.169516	0.187741	0.22339	0.281509	0.397014	0.394335	0.237576	0.0556133	0.0680597	0.0498351	0.0141858	0.0439333	0.159439	0.156759
-448	0.0990999	0.0802324	0.0910091	0.127017	0.171642	0.263118	0.271245	0.148646	0.0495458	0.0684132	0.0576365	0.0216286	0.0229961	0.114473	0.122599
-512	0.0509178	0.0279361	0.0330142	0.0660252	0.0954947	0.15968	0.174592	0.0660802	0.0151624	0.0381441	0.033066	5.49844e-05	0.0294146	0.0936002	0.108512
-704	0.0118249	-0.00636943	-0.00231099	0.0214656	0.0150636	0.020959	0.0290129	0.0216891	0.00986413	0.0280585	0.024	0.000223473	0.00662548	0.000730067	0.00732382

## Sheet: Fig 1 Fig Sup 2 G,H
Fig 1 Sup Fig 2 G	Background subtracted								Fig 1 Sup Fig 2 H	normalized background subtracted									averages										std error									normalized std error
Position	.125x back subtract average	.25x back subtract average	.5x back subtract average	1x back subtract average	2x back subtract average	4x back subtract average	8x back subtract average		position	.125x normalized back subtract average	.25x normalized back subtract average	.5x normalized back subtract average	1x normalized back subtract average	2x normalized back subtract average	4x normalized back subtract average	8x normalized back subtract average			position	.125x average	.25x average	.5x average	1x average	2x average	4x average	8x average			Position	.125x std error	.25x std error	.5x std error	1x std error	2x std error	4x std error	8x std error		position	.125x normalized standard error	.25x normalized standard error	.5x normalized standard error	1x normalized standard error	2x normalized standard error	4x normalized standard error	8x normalized standard error
2496	1.68667	4.13889	7.61071	5.38056	7.8	5.56429	-0.01875		2496	0.01012	0.0237261	0.044131	0.0316845	0.0444002	0.0322077	-0.000107859			2496	54.02	50.7167	59.175	55.575	55.9562	56.3643	50.65			2496	2.93454	3.34082	4.07506	2.08879	4.809	4.13821	1.8473		2496	6.072e-05	0.00013601	0.000255896	0.000186581	0.00025274	0.000186428	-6.20461e-07
2432	2.70667	4.51111	7.10238	6.58681	8.2375	5.01875	-0.20625		2432	0.01624	0.0258599	0.0411835	0.0387877	0.0468906	0.02905	-0.00118645			2432	55.04	51.0889	58.6667	56.7812	56.3937	55.8188	50.4625			2432	3.80248	3.32076	4.47578	2.32056	4.52896	4.07987	1.63219		2432	9.744e-05	0.000148241	0.000238804	0.00022841	0.000266917	0.00016815	-6.82507e-06
2368	3.44167	4.91111	6.85238	7.53889	8.23125	5.8375	-0.2		2368	0.02065	0.0281529	0.0397338	0.0443943	0.046855	0.0337892	-0.0011505			2368	55.775	51.4889	58.4167	57.7333	56.3875	56.6375	50.4688			2368	3.82615	3.3328	4.96512	2.23342	4.10436	4.46174	1.66421		2368	0.0001239	0.000161386	0.000230398	0.000261425	0.000266714	0.000195582	-6.61825e-06
2304	3.98333	5.35	4.53571	7.62778	8.2625	7.14375	-0.28125		2304	0.0239	0.0306688	0.0263005	0.0449177	0.0470329	0.0413501	-0.00161789			2304	56.3167	51.9278	56.1	57.8222	56.4188	57.9438	50.3875			2304	4.42445	3.4074	5.18156	2.29361	3.74301	4.84982	1.71896		2304	0.0001434	0.000175808	0.000152505	0.000264507	0.000267727	0.000239347	-9.30691e-06
2240	4.26667	6.05556	4.93571	7.17222	8.35625	8.5875	-0.2625		2240	0.0256	0.0347134	0.0286199	0.0422351	0.0475665	0.049707	-0.00151003			2240	56.6	52.6333	56.5	57.3667	56.5125	59.3875	50.4062			2240	4.91777	3.52693	5.1914	2.34831	3.62584	5.11329	1.85515		2240	0.0001536	0.000198994	0.000165954	0.00024871	0.000270764	0.000287719	-8.68645e-06
2176	4.525	6.85556	5.40714	6.45556	8.4625	10.0063	-0.06875		2176	0.02715	0.0392994	0.0313535	0.0380149	0.0481713	0.0579191	-0.000395484			2176	56.8583	53.4333	56.9714	56.65	56.6187	60.8063	50.6			2176	5.0513	3.58149	4.99137	2.46607	3.72951	5.28221	2.01649		2176	0.0001629	0.000225283	0.000181805	0.000223858	0.000274207	0.000335253	-2.27502e-06
2112	4.975	7.90556	6.26429	5.6	8.85	11.0313	0.23125		2112	0.02985	0.0453185	0.0363237	0.0329767	0.0503771	0.0638521	0.00133027			2112	57.3083	54.4833	57.8286	55.7944	57.0063	61.8313	50.9			2112	5.14266	3.56099	4.57003	2.6441	3.95556	5.21634	2.18987		2112	0.0001791	0.000259787	0.000210625	0.00019419	0.000286763	0.000369595	7.65235e-06
2048	5.55833	8.84444	7.20714	4.75556	9.35	11.925	0.89375		2048	0.03335	0.0507006	0.0417909	0.0280041	0.0532233	0.0690254	0.0051413			2048	57.8917	55.4222	58.7714	54.95	57.5063	62.725	51.5625			2048	5.13012	3.42268	4.14201	2.80485	4.20398	5.04724	2.38321		2048	0.0002001	0.000290641	0.000242326	0.000164908	0.000302964	0.000399539	2.95753e-05
1984	6.54167	10.1278	7.98571	4.16111	10.25	12.6313	1.69375		1984	0.03925	0.0580573	0.0463055	0.0245035	0.0583464	0.0731134	0.00974329			1984	58.875	56.7056	59.55	54.3556	58.4063	63.4312	52.3625			1984	5.11628	3.26986	3.90689	2.93032	4.3594	4.8567	2.58638		1984	0.0002355	0.000332813	0.000268504	0.000144294	0.000332127	0.000423202	5.60483e-05
1920	7.81667	11.7444	8.77143	3.91111	11.2188	13.35	2.75		1920	0.0469	0.0673248	0.0508615	0.0230314	0.0638608	0.0772737	0.0158194			1920	60.15	58.3222	60.3357	54.1056	59.375	64.15	53.4188			1920	5.11195	3.19288	3.83989	3.07887	4.44191	4.6181	2.71713		1920	0.0002814	0.000385939	0.000294923	0.000135625	0.000363517	0.000447283	9.10009e-05
1856	9.54167	13.6889	9.62857	4.17222	12.6375	14.2375	4.1		1856	0.05725	0.0784713	0.0558317	0.024569	0.0719368	0.0824108	0.0235852			1856	61.875	60.2667	61.1929	54.3667	60.7937	65.0375	54.7688			1856	5.27602	3.15801	3.75171	3.17864	4.36877	4.51677	2.83106		1856	0.0003435	0.000449836	0.000323742	0.000144679	0.000409488	0.000477018	0.000135674
1792	11.5667	16.0389	10.5643	4.96111	14.4188	15.7062	5.78125		1792	0.0694	0.0919427	0.0612575	0.0292145	0.0820763	0.0909124	0.0332566			1792	63.9	62.6167	62.1286	55.1556	62.575	66.5062	56.45			1792	5.47859	3.28994	3.5806	3.25353	4.24348	4.55488	2.84616		1792	0.0004164	0.00052706	0.000355204	0.000172036	0.000467205	0.000526228	0.000191309
1728	13.725	18.5722	11.6071	6.37222	16.175	17.2563	8		1728	0.08235	0.106465	0.0673045	0.0375241	0.0920734	0.0998842	0.04602			1728	66.0583	65.15	63.1714	56.5667	64.3312	68.0563	58.6688			1728	5.59708	3.31525	3.44577	3.23162	4.12215	4.66152	2.71683		1728	0.0004941	0.000610309	0.000390268	0.000220968	0.000524112	0.000578159	0.00026473
1664	15.8333	21.15	12.8429	7.76111	17.9688	18.8563	10.8125		1664	0.095	0.121242	0.0744698	0.0457029	0.102284	0.109146	0.0621989			1664	68.1667	67.7278	64.4071	57.9556	66.125	69.6562	61.4813			1664	5.60107	3.19316	3.37089	3.11785	4.03654	4.71415	2.52401		1664	0.00057	0.000695018	0.000431817	0.000269131	0.000582235	0.000631766	0.000357799
1600	17.6667	23.2944	14.3143	9.36111	19.4875	20.425	13.65		1600	0.106	0.133535	0.083002	0.0551248	0.110929	0.118226	0.0785216			1600	70	69.8722	65.8786	59.5556	67.6437	71.225	64.3188			1600	5.37876	2.93583	3.30402	2.89759	4.09752	4.60454	2.24705		1600	0.000636	0.000765487	0.000481291	0.000324614	0.000631446	0.000684326	0.000451695
1536	19.425	25.1778	16.0143	11.3222	20.5313	21.4875	16.5375		1536	0.11655	0.144331	0.0928595	0.0666732	0.116871	0.124376	0.0951319			1536	71.7583	71.7556	67.5786	61.5167	68.6875	72.2875	67.2063			1536	5.0391	2.62078	3.19904	2.81526	4.07229	4.2379	2.16421		1536	0.0006993	0.000827376	0.00053845	0.000392619	0.000665266	0.000719924	0.000547246
1472	21.2083	26.6222	18.0929	13.6889	21.3188	22.8438	18.9188		1472	0.12725	0.152611	0.104912	0.0806098	0.121353	0.132226	0.10883			1472	73.5417	73.2	69.6571	63.8833	69.475	73.6437	69.5875			1472	4.38565	2.44751	3.01357	2.89382	3.96468	3.75578	2.23246		1472	0.0007635	0.000874843	0.000608338	0.000474687	0.000690783	0.000765365	0.000626045
1408	22.8667	27.85	20.45	16.4389	21.9938	23.9875	20.6562		1408	0.1372	0.15965	0.11858	0.0968037	0.125196	0.138847	0.118825			1408	75.2	74.4278	72.0143	66.6333	70.15	74.7875	71.325			1408	3.73423	2.27808	2.77485	3.20143	3.65885	3.15468	2.3658		1408	0.0008232	0.000915189	0.000687592	0.000570049	0.000712655	0.000803685	0.000683541
1344	24.275	28.7778	22.5929	19.5833	22.7188	25.5063	21.825		1344	0.14565	0.164968	0.131006	0.11532	0.129323	0.147638	0.125548			1344	76.6083	75.3556	74.1571	69.7778	70.875	76.3063	72.4938			1344	3.28178	2.17448	2.64003	3.56888	3.33597	2.57534	2.51866		1344	0.0008739	0.000945677	0.000759642	0.000679088	0.000736147	0.00085457	0.000722216
1280	25.5917	29.8944	24.5643	22.7333	23.6875	27.225	22.7375		1280	0.15355	0.171369	0.142437	0.13387	0.134837	0.157586	0.130797			1280	77.925	76.4722	76.1286	72.9278	71.8438	78.025	73.4062			1280	3.20516	2.02876	2.66318	3.84976	3.07065	2.18036	2.67679		1280	0.0009213	0.000982373	0.000825927	0.00078832	0.000767537	0.000912156	0.000752412
1216	26.575	30.9944	26.1	25.6722	24.9625	29.0438	23.6563		1216	0.15945	0.177675	0.151342	0.151176	0.142095	0.168114	0.136083			1216	78.9083	77.5722	77.6643	75.8667	73.1187	79.8438	74.325			1216	3.37158	1.93546	3.03632	3.90308	2.81855	2.08288	2.85092		1216	0.0009567	0.00101852	0.000877563	0.000890231	0.00080885	0.000973092	0.000782815
1152	27.2667	32.2556	26.9929	28.35	26.35	30.6	24.5313		1152	0.1636	0.184904	0.156519	0.166945	0.149993	0.177122	0.141116			1152	79.6	78.8333	78.5571	78.5444	74.5063	81.4	75.2			1152	3.56308	1.81333	3.37698	3.74961	2.68666	2.34061	2.88753		1152	0.0009816	0.00105996	0.000907583	0.000983088	0.000853809	0.00102523	0.00081177
1088	27.6333	33.5778	27.5643	30.6222	27.9938	31.6313	25.4438		1088	0.1658	0.192484	0.159833	0.180325	0.15935	0.183091	0.146365			1088	79.9667	80.1556	79.1286	80.8167	76.15	82.4313	76.1125			1088	3.65404	1.83009	3.56564	3.4814	2.56686	2.87607	2.81965		1088	0.0009948	0.00110341	0.000926796	0.00106188	0.000907071	0.00105978	0.000841965
1024	28.4417	34.9056	28.1286	32.4333	29.9563	32.3188	26.5562		1024	0.17065	0.200096	0.163105	0.19099	0.170521	0.18707	0.152765			1024	80.775	81.4833	79.6929	82.6278	78.1125	83.1188	77.225			1024	3.56666	2.00046	3.48335	3.04612	2.38795	3.66704	2.68251		1024	0.0010239	0.00114704	0.000945769	0.00112469	0.000970661	0.00108282	0.000878779
960	29.5	36.1556	29.0857	34.0833	32.2938	33.05	27.7312		960	0.177	0.207261	0.168655	0.200707	0.183827	0.191303	0.159524			960	81.8333	82.7333	80.65	84.2778	80.45	83.85	78.4			960	3.40275	2.27118	3.23944	2.76068	2.28965	4.36456	2.6711		960	0.001062	0.00118812	0.000977952	0.0011819	0.0010464	0.00110732	0.000917661
896	31.0083	37.5944	30.9143	36.0722	34.8687	34.4	29.4062		896	0.18605	0.21551	0.179258	0.212419	0.198484	0.199117	0.169159			896	83.3417	84.1722	82.4786	86.2667	83.025	85.2	80.075			896	3.31513	2.58874	3.14191	2.73157	2.23416	4.93204	2.80557		896	0.0011163	0.00123541	0.00103943	0.00125087	0.00112984	0.00115255	0.000973089
832	33.175	39.4667	33.6786	38.8111	37.9813	36.5375	31.3812		832	0.19905	0.226242	0.195287	0.228547	0.216202	0.21149	0.180521			832	85.5083	86.0444	85.2429	89.0056	86.1375	87.3375	82.05			832	3.19597	2.83942	3.27051	2.9239	2.26529	5.17744	2.99793		832	0.0011943	0.00129693	0.00113238	0.00134585	0.00123069	0.00122416	0.00103844
768	35.675	42.0833	37.2143	42.3111	41.4438	39.7312	34		768	0.21405	0.241242	0.215789	0.249158	0.235911	0.229976	0.195585			768	88.0083	88.6611	88.7786	92.5056	89.6	90.5312	84.6688			768	2.89675	3.12547	3.53036	3.27235	2.31625	5.08393	3.16868		768	0.0012843	0.00138292	0.00125126	0.00146722	0.00134289	0.00133117	0.0011251
704	38.6833	45.5111	41.2714	46.4444	45.475	43.8625	37.2938		704	0.2321	0.260892	0.239314	0.273498	0.258859	0.253889	0.214532			704	91.0167	92.0889	92.8357	96.6389	93.6312	94.6625	87.9625			704	2.45497	3.52507	3.72379	3.60154	2.52944	4.78062	3.24411		704	0.0013926	0.00149556	0.00138767	0.00161055	0.00147351	0.00146958	0.0012341
640	42.45	50.0722	45.5714	51.1778	50.6875	49.15	41.3812		640	0.2547	0.287038	0.264248	0.301371	0.28853	0.284495	0.238046			640	94.7833	96.65	97.1357	101.372	98.8438	99.95	92.05			640	1.95084	3.81267	3.83423	3.82087	2.82886	4.38174	3.14353		640	0.0015282	0.00164544	0.00153225	0.00177468	0.00164241	0.00164674	0.00136936
576	47.6167	55.7611	50.8643	56.4389	57.0875	55.9313	47.2875		576	0.2857	0.31965	0.294939	0.332352	0.324961	0.323746	0.272021			576	99.95	102.339	102.429	106.633	105.244	106.731	97.9563			576	1.65559	4.0682	3.70938	3.90584	3.26852	3.95951	3.006		576	0.0017142	0.00183239	0.00171021	0.00195712	0.00184978	0.00187394	0.0015648
512	54.8083	62.9278	57.2929	62.7111	65.1562	64	55.1125		512	0.32885	0.360732	0.332215	0.369287	0.370891	0.370451	0.317035			512	107.142	109.506	108.857	112.906	113.312	114.8	105.781			512	1.67367	4.04963	3.42517	3.77297	3.59511	3.42851	2.92008		512	0.0019731	0.00206789	0.00192636	0.00217462	0.00211123	0.00214428	0.00182374
448	64.85	71.95	66.2286	70.4722	74.925	74.075	65.575		448	0.3891	0.412452	0.384029	0.41499	0.426498	0.428768	0.37722			448	117.183	118.528	117.793	120.667	123.081	124.875	116.244			448	1.98304	3.8622	3.11593	3.49409	3.7881	2.92936	3.00564		448	0.0023346	0.00236438	0.00222681	0.00244375	0.00242777	0.00248183	0.00216996
384	78.1667	83.6333	78.5714	80.65	87.15	86.3125	78.9125		384	0.469	0.479427	0.4556	0.474924	0.496087	0.499602	0.453944			384	130.5	130.211	130.136	130.844	135.306	137.113	129.581			384	2.44892	3.51253	2.66838	3.233	3.87236	2.5125	3.24779		384	0.002814	0.00274831	0.00264181	0.00279669	0.00282389	0.00289184	0.00261131
320	94.4333	98.7167	94.4643	93.9889	102.237	101.187	95.3625		320	0.5666	0.565892	0.547755	0.553473	0.58197	0.585703	0.548573			320	146.767	145.294	146.029	144.183	150.394	151.987	146.031			320	2.65557	3.08695	2.17225	3.027	3.78331	2.1927	3.29895		320	0.0033996	0.00324397	0.00317618	0.00325924	0.00331276	0.00339022	0.00315566
256	112.717	116.767	113.764	110.578	119.881	118.425	114.131		256	0.6763	0.669363	0.659667	0.65116	0.682404	0.685479	0.65654			256	165.05	163.344	165.329	160.772	168.037	169.225	164.8			256	2.48124	2.70135	1.68435	2.81724	3.55431	2.01159	3.21942		256	0.0040578	0.00383711	0.00382511	0.00383449	0.00388447	0.00396775	0.00377674
192	131.5	136.622	134.521	129.589	139.106	137.144	134.081		192	0.789	0.783185	0.780028	0.763111	0.791839	0.793828	0.771302			192	183.833	183.2	186.086	179.783	187.262	187.944	184.75			192	2.02398	2.45567	1.38069	2.67506	3.19496	1.74202	2.93252		192	0.004734	0.00448959	0.00452303	0.00449373	0.00450741	0.00459491	0.00443692
128	148.6	155.4	153.571	148.256	157.269	154.719	153.169		128	0.8916	0.890828	0.89049	0.873033	0.895226	0.895557	0.881103			128	200.933	201.978	205.136	198.45	205.425	205.519	203.838			128	1.61429	2.57416	1.39455	2.84212	2.91208	1.42341	2.47141		128	0.0053496	0.00510666	0.00516355	0.00514103	0.00509592	0.00518375	0.00506854
64	161.267	169.206	167.6	162.861	170.644	167.831	167.738		64	0.9676	0.969968	0.971836	0.959041	0.97136	0.971456	0.96491			64	213.6	215.783	219.164	213.056	218.8	218.631	218.406			64	1.84752	2.78458	1.77162	3.34129	2.71138	1.3946	2.1874		64	0.0058056	0.00556033	0.00563523	0.00564751	0.0055293	0.00562307	0.00555064
0	166.667	174.444	172.457	169.817	175.675	172.762	173.837		0	1	1	1	1	1	1	1			0	219	221.022	224.021	220.011	223.831	223.562	224.506			0	2.29153	2.73004	1.97246	3.94695	2.72309	1.94349	2.28347		0	0.006	0.00573248	0.00579854	0.0058887	0.00569233	0.00578829	0.0057525
-64	163.083	168.594	166.243	166.722	170.162	166.625	168.9		-64	0.9785	0.966465	0.963966	0.981778	0.968621	0.964474	0.971597			-64	215.417	215.172	217.807	216.917	218.319	217.425	219.569			-64	2.72727	2.35581	2.11299	4.25582	3.01957	2.84104	2.79177		-64	0.005871	0.00554025	0.0055896	0.0057814	0.00551371	0.00558266	0.00558911
-128	149.783	151.739	148.936	153.211	153.938	149.331	152.487		-128	0.8987	0.869841	0.86361	0.902215	0.876263	0.864373	0.877184			-128	202.117	198.317	200.5	203.406	202.094	200.131	203.156			-128	3.39726	2.10763	2.924	4.26641	3.58896	3.69435	3.60273		-128	0.0053922	0.00498635	0.00500768	0.00531288	0.00498798	0.00500324	0.005046
-192	127.9	126.711	123.4	131.172	129.219	123.581	127.456		-192	0.7674	0.726369	0.71554	0.772434	0.735556	0.715325	0.733192			-192	180.233	173.289	174.964	181.367	177.375	174.381	178.125			-192	4.4588	2.57117	4.73462	4.16826	4.14634	4.3355	4.70448		-192	0.0046044	0.0041639	0.00414909	0.00454864	0.00418703	0.00414051	0.00421769
-256	100.975	97.95	94.1214	104.294	100.094	94.0875	97.8188		-256	0.60585	0.561497	0.545767	0.614159	0.569767	0.544606	0.562702			-256	153.308	144.528	145.686	154.489	148.25	144.887	148.488			-256	5.33633	3.30483	6.64519	4.05404	4.5051	4.50109	5.75932		-256	0.0036351	0.00321877	0.00316465	0.0036166	0.0032433	0.00315234	0.00323694
-320	72.725	69.7167	65.6714	76.6833	71.2438	65.6	68.6		-320	0.43635	0.39965	0.380799	0.451565	0.405543	0.379712	0.394621			-320	125.058	116.294	117.236	126.878	119.4	116.4	119.269			-320	5.55498	3.7086	7.89469	3.80546	4.45632	4.21645	6.33371		-320	0.0026181	0.00229099	0.00220808	0.00265913	0.00230848	0.00219788	0.00227006
-384	47.2583	45.8889	41.4071	51.8333	46.3438	41.8312	43.6375		-384	0.28355	0.263057	0.240101	0.305231	0.263804	0.242132	0.251025			-384	99.5917	92.4667	92.9714	102.028	94.5	92.6312	94.3062			-384	4.9822	3.64074	8.08624	3.36363	4.05798	3.65942	6.11359		-384	0.0017013	0.00150797	0.00139224	0.00179742	0.00150166	0.00140153	0.00144402
-448	27	27.9611	23.2	31.9722	27.1313	24.35	24.85		-448	0.162	0.160287	0.134526	0.188275	0.15444	0.140945	0.14295			-448	79.3333	74.5389	74.7643	82.1667	75.2875	75.15	75.5187			-448	3.70935	3.19861	7.28153	2.76811	3.58658	3.05389	5.12835		-448	0.000972	0.000918841	0.000780056	0.0011087	0.000879123	0.000815831	0.000822317
-512	13.1167	15.9333	10.9143	17.9278	14.0688	12.6625	12.2312		-512	0.0787	0.0913376	0.0632869	0.105571	0.080084	0.0732943	0.0703603			-512	65.45	62.5111	62.4786	68.1222	62.225	63.4625	62.9			-512	2.30504	2.65201	5.9005	2.17561	3.22755	2.45973	3.8252		-512	0.0004722	0.000523591	0.000366972	0.000621678	0.000455864	0.000424249	0.000404747
-576	4.925	8.78333	3.73571	9.06667	6.05625	5.575	4.84375		-576	0.02955	0.0503503	0.0216617	0.0533909	0.0344742	0.0322697	0.0278637			-576	57.2583	55.3611	55.3	59.2611	54.2125	56.375	55.5125			-576	1.60141	2.31642	4.40376	1.7668	2.99856	2.01438	2.61268		-576	0.0001773	0.000288632	0.000125606	0.000314403	0.000196238	0.000186787	0.000160286
-640	1.25	4.91111	0.142857	4.10556	1.7875	1.6625	1.38125		-640	0.0075	0.0281529	0.000828363	0.0241764	0.010175	0.00962304	0.00794564			-640	53.5833	51.4889	51.7071	54.3	49.9438	52.4625	52.05			-640	1.90152	2.18882	3.14754	1.63722	2.90959	1.54848	1.76228		-640	4.5e-05	0.000161386	4.8033e-06	0.000142368	5.79197e-05	5.5701e-05	4.57073e-05
-704	0.183333	3.00556	-1.44286	1.41667	0	-0.15625	0.1		-704	0.0011	0.0172293	-0.00836647	0.00834233	0	-0.000904421	0.00057525			-704	52.5167	49.5833	50.1214	51.6111	48.1562	50.6438	50.7687			-704	2.38658	2.06481	2.22999	1.62962	2.84123	1.16443	1.47624		-704	6.6e-06	9.87667e-05	-4.85133e-05	4.91255e-05	0	-5.23505e-06	3.30912e-06
-768	0.0333333	1.95	-1.79286	0.266667	-0.7625	-0.575	0		-768	0.0002	0.0111783	-0.010396	0.00157032	-0.0043404	-0.00332827	0			-768	52.3667	48.5278	49.7714	50.4611	47.3937	50.225	50.6688			-768	2.65766	1.98211	1.73672	1.69024	2.82697	0.93018	1.51758		-768	1.2e-06	6.40797e-05	-6.02814e-05	9.24715e-06	-2.4707e-05	-1.9265e-05	0
-832	0.258333	1.33889	-1.88571	-0.205556	-0.85	-0.0125	0.40625		-832	0.00155	0.00767516	-0.0109344	-0.00121046	-0.00483848	-7.23537e-05	0.00233695			-832	52.5917	47.9167	49.6786	49.9889	47.3063	50.7875	51.075			-832	2.72897	1.85891	1.52763	1.68987	2.67673	0.985114	1.64787		-832	9.3e-06	4.39977e-05	-6.34035e-05	-7.12801e-06	-2.75422e-05	-4.18804e-07	1.34433e-05
-896	0.175	0.838889	-1.83571	-0.427778	-0.91875	1.0375	0.85625		-896	0.00105	0.00480892	-0.0106445	-0.00251906	-0.00522983	0.00600535	0.00492558			-896	52.5083	47.4167	49.7286	49.7667	47.2375	51.8375	51.525			-896	2.54336	1.717	1.51222	1.56704	2.48696	1.2971	1.86604		-896	6.3e-06	2.7567e-05	-6.17224e-05	-1.4834e-05	-2.97699e-05	3.47608e-05	2.83344e-05
-960	0.0416667	0.244444	-1.73571	-0.383333	-0.80625	2.26875	1.10625		-960	0.00025	0.00140127	-0.0100646	-0.00225734	-0.00458944	0.0131322	0.0063637			-960	52.375	46.8222	49.8286	49.8111	47.35	53.0688	51.775			-960	2.22947	1.63945	1.58175	1.34233	2.22402	1.5889	1.99617		-960	1.5e-06	8.03278e-06	-5.83601e-05	-1.32928e-05	-2.61246e-05	7.6013e-05	3.66072e-05
-1024	0	-0.505556	-1.63571	-0.15	-0.54375	3.18125	1.15625		-1024	0	-0.00289809	-0.00948476	-0.000883306	-0.0030952	0.018414	0.00665133			-1024	52.3333	46.0722	49.9286	50.0444	47.6125	53.9813	51.825			-1024	1.88837	1.54058	1.77197	1.11525	1.97218	1.85224	2.18866		-1024	0	-1.66133e-05	-5.49978e-05	-5.20152e-06	-1.76189e-05	0.000106586	3.82617e-05
-1088	0.158333	-1.26111	-1.24286	0.144444	-0.225	3.7	0.98125		-1088	0.00095	-0.0072293	-0.00720676	0.000850591	-0.00128077	0.0214167	0.00564464			-1088	52.4917	45.3167	50.3214	50.3389	47.9313	54.5	51.65			-1088	1.67905	1.42768	1.82035	1.01828	1.7849	1.96858	2.27292		-1088	5.7e-06	-4.14418e-05	-4.17887e-05	5.00888e-06	-7.29059e-06	0.000123966	3.24708e-05
-1152	0.25	-1.72222	-0.735714	0.727778	0.11875	3.43125	0.85625		-1152	0.0015	-0.00987261	-0.00426607	0.00428567	0.000675964	0.0198611	0.00492558			-1152	52.5833	44.8556	50.8286	50.9222	48.275	54.2312	51.525			-1152	1.64459	1.26426	1.81296	1.27444	1.72271	2.07106	2.30478		-1152	9e-06	-5.65946e-05	-2.4737e-05	2.5237e-05	3.84781e-06	0.000114962	2.83344e-05
-1216	0.541667	-2.03889	-0.214286	1.10556	0.83125	2.5	0.5		-1216	0.00325	-0.0116879	-0.00124254	0.00651029	0.00473175	0.0144707	0.00287625			-1216	52.875	44.5389	51.35	51.3	48.9875	53.3	51.1688			-1216	1.67853	1.2609	1.73408	1.51869	1.75307	2.08769	2.34702		-1216	1.95e-05	-6.70007e-05	-7.20495e-06	3.83372e-05	2.69347e-05	8.37608e-05	1.65456e-05
-1280	0.5	-2.05556	0.0214286	1.20556	1.75	1.3875	0.2875		-1280	0.003	-0.0117834	0.000124254	0.00709916	0.00996158	0.00803126	0.00165384			-1280	52.8333	44.5222	51.5857	51.4	49.9062	52.1875	50.9563			-1280	1.85976	1.42196	1.68577	1.64435	1.97991	2.2225	2.27859		-1280	1.8e-05	-6.75484e-05	7.20495e-07	4.18048e-05	5.67046e-05	4.64873e-05	9.51373e-06
-1344	0.025	-1.73333	0.114286	1.12778	2.49375	0.15625	0.0125		-1344	0.00015	-0.00993631	0.000662691	0.00664115	0.0141952	0.000904421	7.19062e-05			-1344	52.3583	44.8444	51.6786	51.3222	50.65	50.9563	50.6812			-1344	2.15518	1.63755	1.85428	1.70415	2.29395	2.24241	2.19908		-1344	9e-07	-5.69597e-05	3.84264e-06	3.91078e-05	8.0804e-05	5.23505e-06	4.13641e-07
-1408	-0.591667	-1.24444	0	0.8	3.025	-0.74375	-0.125		-1408	-0.00355	-0.00713376	0	0.00471096	0.0172193	-0.00430504	-0.000719062			-1408	51.7417	45.3333	51.5643	50.9944	51.1812	50.0563	50.5438			-1408	2.51375	1.77826	1.84498	1.59684	2.65806	2.19074	2.05216		-1408	-2.13e-05	-4.08942e-05	0	2.77415e-05	9.80179e-05	-2.49189e-05	-4.13641e-06
-1472	-1.25833	-0.788889	-0.157143	0.455556	3.2125	-1.26875	-0.1875		-1472	-0.00755	-0.00452229	-0.000911199	0.00268263	0.0182866	-0.0073439	-0.00107859			-1472	51.075	45.7889	51.4071	50.65	51.3687	49.5312	50.4812			-1472	2.83788	1.78355	1.89818	1.48632	2.86979	1.96971	1.984		-1472	-4.53e-05	-2.5924e-05	-5.28363e-06	1.57972e-05	0.000104093	-4.25086e-05	-6.20461e-06
-1536	-1.9	-0.45	-0.0928571	0.144444	2.85	-1.375	-0.225		-1536	-0.0114	-0.00257962	-0.000538436	0.000850591	0.0162231	-0.0079589	-0.00129431			-1536	50.4333	46.1278	51.4714	50.3389	51.0062	49.425	50.4438			-1536	3.12105	1.71883	1.88839	1.47614	3.00282	1.72905	1.87778		-1536	-6.84e-05	-1.47876e-05	-3.12214e-06	5.00888e-06	9.23475e-05	-4.60685e-05	-7.44553e-06
-1600	-2.38333	-0.255556	0.121429	0	2.3125	-1.2125	-0.4		-1600	-0.0143	-0.00146497	0.000704109	0	0.0131635	-0.00701831	-0.002301			-1600	49.95	46.3222	51.6857	50.1944	50.4688	49.5875	50.2687			-1600	3.22712	1.61771	2.03955	1.50235	2.92258	1.42855	1.70172		-1600	-8.58e-05	-8.39791e-06	4.0828e-06	0	7.4931e-05	-4.0624e-05	-1.32365e-05
-1664	-2.675	-0.127778	0.321429	-0.238889	1.45	-0.9625	-0.51875		-1664	-0.01605	-0.000732484	0.00186382	-0.00140675	0.00825388	-0.00557123	-0.00298411			-1664	49.6583	46.45	51.8857	49.9556	49.6062	49.8375	50.15			-1664	3.24655	1.57535	2.34698	1.76929	2.73414	1.2602	1.60354		-1664	-9.63e-05	-4.19895e-06	1.08074e-05	-8.28391e-06	4.69838e-05	-3.22479e-05	-1.71661e-05
-1728	-2.81667	0	0.671429	-0.533333	0.49375	-0.575	-0.8375		-1728	-0.0169	0	0.00389331	-0.00314064	0.00281059	-0.00332827	-0.00481772			-1728	49.5167	46.5778	52.2357	49.6611	48.65	50.225	49.8313			-1728	3.04306	1.57473	2.56878	2.10839	2.59711	1.17164	1.57214		-1728	-0.0001014	0	2.25755e-05	-1.84943e-05	1.59988e-05	-1.9265e-05	-2.77139e-05
-1792	-2.86667	0.0277778	1.11429	-0.838889	-0.3625	-0.38125	-1.0375		-1792	-0.0172	0.000159236	0.00646123	-0.00493997	-0.00206347	-0.00220679	-0.00596822			-1792	49.4667	46.6056	52.6786	49.3556	47.7938	50.4188	49.6313			-1792	2.63973	1.64757	2.66795	2.42528	2.52365	1.16257	1.52554		-1792	-0.0001032	9.12816e-07	3.74657e-05	-2.909e-05	-1.17459e-05	-1.27735e-05	-3.43322e-05
-1856	-2.68333	0.383333	1.48571	-0.938889	-1.26875	-0.25	-1.13125		-1856	-0.0161	0.00219745	0.00861498	-0.00552884	-0.00722214	-0.00144707	-0.00650751			-1856	49.65	46.9611	53.05	49.2556	46.8875	50.55	49.5375			-1856	2.14006	1.8066	2.63561	2.66077	2.62568	1.24787	1.39126		-1856	-9.66e-05	1.25969e-05	4.99543e-05	-3.25577e-05	-4.11108e-05	-8.37608e-06	-3.74345e-05
-1920	-2.35	0.933333	1.90714	-2.13194	-1.775	0.025	-1.06875		-1920	-0.0141	0.00535032	0.0110586	-0.0125544	-0.0101039	0.000144707	-0.00614798			-1920	49.9833	47.5111	53.4714	48.0625	46.3813	50.825	49.6			-1920	1.67239	2.03471	2.56894	2.91091	2.80404	1.33951	1.20052		-1920	-8.46e-05	3.06706e-05	6.4124e-05	-7.39291e-05	-5.75146e-05	8.37608e-07	-3.53663e-05
-1984	-1.825	1.39444	2.25714	-4.23611	-1.74375	0.01875	-1.06875		-1984	-0.01095	0.00799363	0.0130881	-0.0249452	-0.009926	0.00010853	-0.00614798			-1984	50.5083	47.9722	53.8214	45.9583	46.4125	50.8187	49.6			-1984	1.36557	2.2502	2.47514	3.03595	3.00907	1.3144	1.00499		-1984	-6.57e-05	4.58234e-05	7.58921e-05	-0.000146895	-5.65021e-05	6.28206e-07	-3.53663e-05
-2048	-1.60833	1.93889	2.34286	-3.61111	-1.39375	0	-1.00625		-2048	-0.00965	0.0111146	0.0135852	-0.0212648	-0.00793368	0	-0.00578845			-2048	50.725	48.5167	53.9071	46.5833	46.7625	50.8	49.6625			-2048	1.42155	2.34234	2.4355	2.75302	3.19452	1.17274	0.988716		-2048	-5.79e-05	6.37146e-05	7.87741e-05	-0.000125222	-4.51611e-05	0	-3.32981e-05
-2112	-1.25833	2.19444	2.71071	-2.72778	-0.6625	0.00625	-1.04375		-2112	-0.00755	0.0125796	0.0157182	-0.0160631	-0.00377117	3.61768e-05	-0.00600417			-2112	51.075	48.7722	54.275	47.4667	47.4937	50.8062	49.625			-2112	1.82215	2.29797	2.72911	2.48179	3.19287	0.913289	1.20892		-2112	-4.53e-05	7.21125e-05	9.11426e-05	-9.45907e-05	-2.14667e-05	2.09402e-07	-3.4539e-05
-2176	-1	2.30556	2.06071	-1.47778	0.15625	-0.05625	-1.1375		-2176	-0.006	0.0132166	0.0119491	-0.0087022	0.000889426	-0.000325591	-0.00654347			-2176	51.3333	48.8833	53.625	48.7167	48.3125	50.7437	49.5312			-2176	2.29088	2.21602	2.83979	2.24505	3.03796	0.625839	1.46423		-2176	-3.6e-05	7.57637e-05	6.92876e-05	-5.12446e-05	5.06291e-06	-1.88462e-06	-3.76413e-05
-2240	-0.891667	2.27778	1.32738	-1.67444	0.9125	-0.06875	-1.21875		-2240	-0.00535	0.0130573	0.00769687	-0.00986031	0.00519425	-0.000397945	-0.00701086			-2240	51.4417	48.8556	52.8917	48.52	49.0688	50.7312	49.45			-2240	2.6315	2.01971	2.88893	2.24685	2.7253	0.587961	1.64526		-2240	-3.21e-05	7.48509e-05	4.46306e-05	-5.80644e-05	2.95674e-05	-2.30342e-06	-4.033e-05
-2304	-0.875	2	0.477381	-0.964444	1.55625	0.0625	-1.45625		-2304	-0.00525	0.011465	0.00276811	-0.00567933	0.00885869	0.000361768	-0.00837708			-2304	51.4583	48.5778	52.0417	49.23	49.7125	50.8625	49.2125			-2304	2.69898	1.87235	2.95641	2.06609	2.40009	0.728212	1.60978		-2304	-3.15e-05	6.57227e-05	1.6051e-05	-3.34439e-05	5.04266e-05	2.09402e-06	-4.81891e-05
-2368	-0.825	1.82778	-0.0892857	-0.514444	1.8625	0.5	-1.83125		-2368	-0.00495	0.0104777	-0.000517727	-0.00302941	0.010602	0.00289415	-0.0105343			-2368	51.5083	48.4056	51.475	49.68	50.0188	51.3	48.8375			-2368	2.58743	1.72372	3.03346	1.87753	2.1208	0.917878	1.52417		-2368	-2.97e-05	6.00633e-05	-3.00206e-06	-1.78393e-05	6.03499e-05	1.67522e-05	-6.05983e-05
-2432	-0.641667	1.56111	-0.0809524	-0.384444	2.11875	1.67143	-2.16875		-2432	-0.00385	0.00894904	-0.000469406	-0.00226388	0.0120606	0.00967472	-0.0124757			-2432	51.6917	48.1389	51.4833	49.81	50.275	52.4714	48.5			-2432	2.26011	1.65635	3.05527	1.73553	1.95798	0.970738	1.47677		-2432	-2.31e-05	5.13003e-05	-2.72187e-06	-1.33313e-05	6.8653e-05	5.60001e-05	-7.17666e-05
-2496	-0.175	1.37778	0.177381	-1.18444	1.9875	2.07143	-2.4375		-2496	-0.00105	0.00789809	0.00102855	-0.00697484	0.0113135	0.01199	-0.0140217			-2496	52.1583	47.9556	51.7417	49.01	50.1437	52.8714	48.2312			-2496	1.83358	1.72049	3.00334	1.61965	1.87065	1.01714	1.49371		-2496	-6.3e-06	4.52757e-05	5.9641e-06	-4.10728e-05	6.44002e-05	6.94018e-05	-8.06599e-05

## Sheet: Fig 1 Fig Sup 2 I
									absolute Difference between Mal3 and normalized background subtracted								Sum of absolute difference
Position	.125x normalized back subtract average	.25x normalized back subtract average	.5x normalized back subtract average	1x normalized back subtract average	2x normalized back subtract average	4x normalized back subtract average	8x normalized back subtract average	Mal3 from Beiling et al. 2007	.125x and Beiling absolute difference	.25x and Beiling absolute difference	.5x and Beiling absolute difference	1x and Beiling absolute difference	2x and Beiling absolute difference	4x and Beiling absolute difference	8x and Beiling absolute difference			0.125X	.25X	.5X	1X	2X	4X	8X
2048	0.03335	0.0507006	0.0417909	0.0280041	0.0532233	0.0690254	0.0051413	0.102589	0.0692394	0.0518887	0.0607984	0.0745853	0.0493661	0.033564	0.0974481			0.90361	0.932801	0.674648	1.23885	0.916453	0.864532	0.745981
1856	0.05725	0.0784713	0.0558317	0.024569	0.0719368	0.0824108	0.0235852	0.102682	0.0454319	0.0242105	0.0468502	0.0781129	0.0307451	0.0202711	0.0790966
1728	0.08235	0.106465	0.0673045	0.0375241	0.0920734	0.0998842	0.04602	0.105966	0.023616	0.000498975	0.0386615	0.0684419	0.0138926	0.00608176	0.059946
1536	0.11655	0.144331	0.0928595	0.0666732	0.116871	0.124376	0.0951319	0.0997169	0.0168331	0.0446143	0.00685741	0.0330437	0.0171537	0.024659	0.00458497			GDP Edge off rate
1408	0.1372	0.15965	0.11858	0.0968037	0.125196	0.138847	0.118825	0.131596	0.00560401	0.0280537	0.0130158	0.0347922	0.00640031	0.00725069	0.0127709			3.125	0.90361
1216	0.15945	0.177675	0.151342	0.151176	0.142095	0.168114	0.136083	0.147586	0.0118636	0.0300888	0.00375554	0.0035897	0.00549163	0.0205273	0.0115039			6.25	0.932801
1088	0.1658	0.192484	0.159833	0.180325	0.15935	0.183091	0.146365	0.160394	0.00540554	0.0320896	0.000561794	0.0199307	0.00104481	0.0226965	0.0140293			12.5	0.674648
896	0.18605	0.21551	0.179258	0.212419	0.198484	0.199117	0.169159	0.163683	0.0223668	0.0518263	0.0155746	0.0487354	0.0348012	0.0354341	0.00547621			25	1.23885
704	0.2321	0.260892	0.239314	0.273498	0.258859	0.253889	0.214532	0.201913	0.0301869	0.0589786	0.037401	0.0715844	0.0569456	0.0519759	0.0126191			50	0.916453
512	0.32885	0.360732	0.332215	0.369287	0.370891	0.370451	0.317035	0.306917	0.021933	0.0538155	0.025298	0.0623701	0.0639738	0.0635338	0.0101176			100	0.864532
448	0.3891	0.412452	0.384029	0.41499	0.426498	0.428768	0.37722	0.364176	0.0249237	0.0482759	0.0198529	0.0508137	0.0623215	0.0645915	0.0130438			200	0.745981
384	0.469	0.479427	0.4556	0.474924	0.496087	0.499602	0.453944	0.440493	0.0285073	0.038934	0.015107	0.0344312	0.0555938	0.0591093	0.0134513
320	0.5666	0.565892	0.547755	0.553473	0.58197	0.585703	0.548573	0.526328	0.0402716	0.0395633	0.0214267	0.0271443	0.0556411	0.0593745	0.0222442
256	0.6763	0.669363	0.659667	0.65116	0.682404	0.685479	0.65654	0.612146	0.0641543	0.0572174	0.0475213	0.0390141	0.0702579	0.0733329	0.0443942
192	0.789	0.783185	0.780028	0.763111	0.791839	0.793828	0.771302	0.691631	0.0973694	0.0915541	0.0883976	0.07148	0.100208	0.102198	0.0796716
128	0.8916	0.890828	0.89049	0.873033	0.895226	0.895557	0.881103	0.898243	0.00664323	0.0074152	0.00775284	0.0252102	0.00301767	0.00268574	0.0171402
64	0.9676	0.969968	0.971836	0.959041	0.97136	0.971456	0.96491	0.965008	0.00259204	0.0049602	0.0068277	0.00596716	0.00635251	0.00644852	9.81982e-05
0	1	1	1	1	1	1	1	1	0	0	0	0	0	0	0
-64	0.9785	0.966465	0.963966	0.981778	0.968621	0.964474	0.971597	0.955549	0.0229512	0.0109162	0.00841743	0.026229	0.0130723	0.00892558	0.0160483
-128	0.8987	0.869841	0.86361	0.902215	0.876263	0.864373	0.877184	0.863436	0.0352638	0.00640456	0.000173802	0.0387786	0.0128268	0.000936851	0.0137479
-192	0.7674	0.726369	0.71554	0.772434	0.735556	0.715325	0.733192	0.761781	0.00561881	0.0354118	0.0462411	0.0106531	0.0262255	0.0464567	0.0285893
-256	0.60585	0.561497	0.545767	0.614159	0.569767	0.544606	0.562702	0.482201	0.123649	0.0792958	0.0635661	0.131958	0.0875656	0.062405	0.0805012
-320	0.43635	0.39965	0.380799	0.451565	0.405543	0.379712	0.394621	0.329702	0.106648	0.0699474	0.0510962	0.121863	0.0758406	0.0500097	0.0649191
-384	0.28355	0.263057	0.240101	0.305231	0.263804	0.242132	0.251025	0.237576	0.0459741	0.0254815	0.0025252	0.0676553	0.026228	0.00455568	0.0134488
-448	0.162	0.160287	0.134526	0.188275	0.15444	0.140945	0.14295	0.148646	0.0133544	0.011641	0.0141195	0.0396293	0.00579437	0.00770071	0.00569605
-512	0.0787	0.0913376	0.0632869	0.105571	0.080084	0.0732943	0.0703603	0.0660802	0.0126198	0.0252574	0.00279321	0.0394912	0.0140038	0.00721411	0.0042801
-704	0.0011	0.0172293	-0.00836647	0.00834233	0	-0.000904421	0.00057525	0.0216891	0.0205891	0.00445975	0.0300555	0.0133467	0.0216891	0.0225935	0.0211138
