# Supplementary material for: Rapid binding to protofilament edge sites facilitates tip tracking of EB1 at growing microtubule plus-ends
Source: eLife. 2024 Feb 22;13:e91719. doi: 10.7554/eLife.91719 (PMC10883673; doi:10.7554/eLife.91719)
Supplement: Figure 1—figure supplement 3—source data 1. [file elife-91719-fig1-figsupp3-data1.xlsx]

## Sheet: Fig 1 Fig Sup 3 A,B
Fig 1 Sup Fig 3 A	Background subtracted								Fig 1 Sup Fig 3 B	normalized background subtracted									averages										std error									normalized std error
Position	.125x back subtract average	.25x back subtract average	.5x back subtract average	1x back subtract average	2x back subtract average	4x back subtract average	8x back subtract average		position	.125x normalized back subtract average	.25x normalized back subtract average	.5x normalized back subtract average	1x normalized back subtract average	2x normalized back subtract average	4x normalized back subtract average	8x normalized back subtract average			position	.125x average	.25x average	.5x average	1x average	2x average	4x average	8x average			Position	.125x std error	.25x std error	.5x std error	1x std error	2x std error	4x std error	8x std error	0	position	.125x normalized standard error	.25x normalized standard error	.5x normalized standard error	1x normalized standard error	2x normalized standard error	4x normalized standard error	8x normalized standard error
2496	14.7167	26.93	16.65	0.814286	4.39167	0.138333	3.26519		2496	0.0818629	0.150792	0.0970845	0.00483912	0.0260434	0.000795514	0.018764			2496	59.2611	71.96	67.4167	54.8	56.3417	49.88	52.1363			2496	12.836	12.6247	6.65684	3.84474	2.65279	1.64205	1.76185		2496	0.0714017	0.0706911	0.0388154	0.0228485	0.0157315	0.00944293	0.0101248
2432	15.1222	29.46	17.6667	1.2	4.49167	-0.141667	3.787		2432	0.0841188	0.164959	0.103013	0.00713134	0.0266365	-0.000814683	0.0217627			2432	59.6667	74.49	68.4333	55.1857	56.4417	49.6	52.6581			2432	12.8243	13.5468	6.07388	3.73283	2.866	1.47838	1.45827		2432	0.0713366	0.0758544	0.0354162	0.0221834	0.0169959	0.00850172	0.0083802
2368	15.6722	32.19	18.65	1.4	2.97143	-1.19167	4.03629		2368	0.0871782	0.180245	0.108746	0.00831989	0.0176211	-0.00685293	0.0231952			2368	60.2167	77.22	69.4167	55.3857	54.9214	48.55	52.9074			2368	12.8311	14.1737	5.49234	3.41763	3.00326	1.46851	1.41265		2368	0.0713742	0.0793643	0.0320253	0.0203102	0.0178099	0.00844498	0.00811807
2304	16.8222	35.31	19.45	1.61429	2.37857	-0.975	4.33557		2304	0.0935752	0.197715	0.113411	0.00959334	0.0141054	-0.00560694	0.0249151			2304	61.3667	80.34	70.2167	55.6	54.3286	48.7667	53.2067			2304	12.8332	14.3771	5.03347	3.06314	3.35618	1.47905	1.40338		2304	0.0713858	0.0805033	0.0293497	0.0182036	0.0199028	0.00850559	0.00806479
2240	18.5333	39.19	20.4667	1.72857	1.61429	-0.3	4.81614		2240	0.103093	0.219441	0.119339	0.0102725	0.00957303	-0.00172521	0.0276768			2240	63.0778	84.22	71.2333	55.7143	53.5643	49.4417	53.6873			2240	12.9319	14.0661	4.66343	2.73357	3.77793	1.40961	1.43098		2240	0.0719349	0.0787622	0.027192	0.016245	0.0224038	0.00810626	0.00822335
2176	20.7556	43.5	21.3	2.11429	0.942857	0.775	5.46829		2176	0.115455	0.243575	0.124198	0.0125647	0.00559132	0.0044568	0.0314245			2176	65.3	88.53	72.0667	56.1	52.8929	50.5167	54.3394			2176	13.1128	13.6171	4.51286	2.61854	3.98889	1.26324	1.52019		2176	0.0729412	0.076248	0.0263141	0.0155614	0.0236549	0.00726455	0.00873603
2112	23.2333	48.04	22.2833	2.51429	0.828571	1.96667	6.05957		2112	0.129238	0.268996	0.129932	0.0149418	0.00491359	0.0113097	0.0348224			2112	67.7778	93.07	73.05	56.5	52.7786	51.7083	54.9307			2112	13.3749	13.2434	4.29028	2.70442	4.00767	1.33637	1.53624		2112	0.0743989	0.0741554	0.0250162	0.0160718	0.0237663	0.00768509	0.00882828
2048	26.1167	52.35	23.2833	2.77143	1.37857	3.2	6.41557		2048	0.145276	0.29313	0.135763	0.01647	0.00817519	0.0184023	0.0368682			2048	70.6611	97.38	74.05	56.7571	53.3286	52.9417	55.2867			2048	13.7229	12.9247	3.96062	2.93618	3.86828	1.58659	1.57138		2048	0.076335	0.0723705	0.023094	0.0174491	0.0229396	0.00912404	0.00903022
1984	29.2667	55.61	25.0167	3.04286	2.52143	4.33333	6.646		1984	0.162799	0.311384	0.14587	0.018083	0.0149526	0.0249197	0.0381924			1984	73.8111	100.64	75.7833	57.0286	54.4714	54.075	55.5171			1984	14.1912	12.401	3.34568	3.16594	3.62647	2.09609	1.61949		1984	0.0789398	0.0694381	0.0195083	0.0188145	0.0215057	0.012054	0.00930671
1920	33.1167	57.66	27.2333	3.47143	4.23571	5.2	6.55871		1920	0.184215	0.322862	0.158795	0.0206299	0.0251186	0.0299037	0.0376908			1920	77.6611	102.69	78	57.4571	56.1857	54.9417	55.4299			1920	14.7103	11.5842	2.46396	3.42642	3.37291	2.60247	1.67742		1920	0.0818272	0.064865	0.0143671	0.0203625	0.020002	0.014966	0.0096396
1856	37.4944	58.92	29.5	3.94286	5.81429	5.78333	6.43786		1856	0.208566	0.329918	0.172012	0.0234315	0.0344798	0.0332583	0.0369963			1856	82.0389	103.95	80.2667	57.9286	57.7643	55.525	55.309			1856	15.2331	10.3014	2.01807	3.71312	3.19516	2.9255	1.65634		1856	0.0847353	0.0576816	0.0117672	0.0220662	0.0189479	0.0168237	0.00951847
1792	42.8333	59.89	31.9833	4.52857	7.29286	5.875	6.14529		1792	0.238264	0.335349	0.186492	0.0269123	0.0432481	0.0337854	0.035315			1792	87.3778	104.92	82.75	58.5143	59.2429	55.6167	55.0164			1792	15.6426	8.76732	2.18984	3.91806	3.08372	2.96521	1.61862		1792	0.0870134	0.0490919	0.0127688	0.0232842	0.0182871	0.017052	0.0093017
1728	49.2333	61.08	34	5.4	8.61429	5.775	5.89857		1728	0.273865	0.342012	0.198251	0.032091	0.0510844	0.0332103	0.0338972			1728	93.7778	106.11	84.7667	59.3857	60.5643	55.5167	54.7697			1728	15.8436	7.08023	2.71474	3.99042	3.05047	2.83573	1.48172		1728	0.0881315	0.0396452	0.0158294	0.0237142	0.0180899	0.0163074	0.00851496
1664	56.7278	63.17	35.7667	6.68571	9.72857	5.84167	5.40729		1664	0.315554	0.353715	0.208552	0.0397317	0.0576923	0.0335937	0.0310739			1664	101.272	108.2	86.5333	60.6714	61.6786	55.5833	54.2784			1664	15.8366	5.44147	3.05165	3.98409	2.988	2.90329	1.40349		1664	0.0880928	0.0304691	0.0177939	0.0236765	0.0177194	0.016696	0.0080654
1600	65.0333	66.25	37.1167	8.41429	10.8571	6.425	5.24986		1600	0.361754	0.370961	0.216424	0.0500042	0.064385	0.0369483	0.0301692			1600	109.578	111.28	87.8833	62.4	62.8071	56.1667	54.121			1600	15.6463	3.94547	3.13992	3.82046	2.93606	3.0256	1.43643		1600	0.0870338	0.0220923	0.0183086	0.0227042	0.0174114	0.0173993	0.00825471
1536	73.7833	69.94	38.1833	10.8	11.7857	7.20833	4.994		1536	0.410427	0.391623	0.222643	0.064182	0.0698916	0.041453	0.0286989			1536	118.328	114.97	88.95	64.7857	63.7357	56.95	53.8651			1536	15.3545	2.75462	2.87013	3.57408	2.948	3.19477	1.66217		1536	0.085411	0.0154243	0.0167354	0.02124	0.0174822	0.0183722	0.00955197
1472	82.6444	73.41	38.55	13.2857	12.8214	8.6	5.047		1472	0.459718	0.411053	0.224781	0.0789541	0.0760335	0.0494561	0.0290035			1472	127.189	118.44	89.3167	67.2714	64.7714	58.3417	53.9181			1472	14.9198	2.03914	2.65774	3.26282	2.94866	3.3168	1.92375		1472	0.0829927	0.011418	0.015497	0.0193902	0.0174861	0.019074	0.0110552
1408	91.0944	76.22	38.9	15.8571	13.85	9.96667	5.14		1408	0.506721	0.426788	0.226822	0.0942355	0.0821332	0.0573154	0.0295379			1408	135.639	121.25	89.6667	69.8429	65.8	59.7083	54.0111			1408	14.1952	2.0009	2.63636	2.93868	2.95966	3.38597	2.12688		1408	0.078962	0.0112039	0.0153723	0.0174639	0.0175514	0.0194717	0.0122225
1344	99.0667	77.89	39.2	18.4143	14.9643	11.3583	5.24343		1344	0.551068	0.436139	0.228571	0.109432	0.0887411	0.0653184	0.0301323			1344	143.611	122.92	89.9667	72.4	66.9143	61.1	54.1146			1344	13.0616	2.38971	2.8614	2.6076	2.94427	3.39894	2.2659		1344	0.0726566	0.013381	0.0166845	0.0154964	0.0174601	0.0195463	0.0130214
1280	106.056	78.97	39.45	20.7429	16.1214	12.0083	5.58114		1280	0.589944	0.442186	0.230029	0.12327	0.0956032	0.0690564	0.032073			1280	150.6	124	90.2167	74.7286	68.0714	61.75	54.4523			1280	11.4883	2.8256	3.21683	2.29006	3.04153	3.27005	2.30953		1280	0.0639046	0.0158217	0.018757	0.0136093	0.0180369	0.0188051	0.0132721
1216	111.883	79.92	39.7667	23.1714	17.4929	12.7167	6.25229		1216	0.622362	0.447505	0.231876	0.137703	0.103736	0.0731298	0.0359299			1216	156.428	124.95	90.5333	77.1571	69.4429	62.4583	55.1234			1216	9.61699	3.12352	3.537	2.10169	3.11624	3.21879	2.21026		1216	0.0534954	0.0174899	0.0206239	0.0124899	0.0184799	0.0185103	0.0127017
1152	116.444	81.16	40.6	25.5143	18.9429	12.9833	7.46886		1152	0.647733	0.454449	0.236735	0.151626	0.112335	0.0746633	0.0429211			1152	160.989	126.19	91.3667	79.5	70.8929	62.725	56.34			1152	7.61514	3.23322	3.83679	2.1908	3.14604	3.29304	2.03267		1152	0.0423599	0.0181041	0.0223719	0.0130194	0.0186567	0.0189373	0.0116811
1088	119.639	82.74	41.8	27.8857	20.75	13.2833	9.24514		1088	0.665503	0.463296	0.243732	0.165719	0.123052	0.0763886	0.0531289			1088	164.183	127.77	92.5667	81.8714	72.7	63.025	58.1163			1088	5.76086	3.28705	4.03221	2.50002	3.27258	3.51267	1.77775		1088	0.0320453	0.0184056	0.0235114	0.0148571	0.019407	0.0202003	0.0102162
1024	121.344	84.69	43.4833	30.1857	22.2786	14.0083	11.819		1024	0.67499	0.474215	0.253547	0.179387	0.132116	0.0805578	0.06792			1024	165.889	129.72	94.25	84.1714	74.2286	63.75	60.6901			1024	4.29427	3.29344	4.25126	2.98026	3.52772	3.71736	1.49096		1024	0.0238873	0.0184413	0.0247887	0.017711	0.02092	0.0213774	0.00856807
960	122.356	86.21	45.3333	32.2286	24.1857	15.3083	14.9651		960	0.680614	0.482726	0.264334	0.191527	0.143426	0.0880337	0.0859999			960	166.9	131.24	96.1	86.2143	76.1357	65.05	63.8363			960	3.43791	3.56579	4.29231	3.40758	3.73796	3.83665	1.34035		960	0.0191237	0.0199664	0.025028	0.0202505	0.0221668	0.0220634	0.00770255
896	122.767	87.34	47.5667	34.2429	26.2286	16.9833	18.6139		896	0.682901	0.489053	0.277357	0.203498	0.15554	0.0976662	0.106968			896	167.311	132.37	98.3333	88.2286	78.1786	66.725	67.485			896	3.15769	3.92376	4.30547	3.79714	4.04709	3.69417	1.39766		896	0.017565	0.0219708	0.0251048	0.0225655	0.024	0.0212441	0.00803189
832	123.033	87.99	49.9	36.2143	28.7357	19.5917	22.7603		832	0.684385	0.492693	0.290962	0.215214	0.170408	0.112666	0.130796			832	167.578	133.02	100.667	90.2	80.6857	69.3333	71.6314			832	3.1687	4.14713	4.2118	3.86882	4.37593	3.42496	1.45198		832	0.0176262	0.0232215	0.0245586	0.0229915	0.0259501	0.019696	0.00834408
768	123.322	88.3	52.4833	38.3714	31.8357	22.6583	27.1503		768	0.685992	0.494429	0.306025	0.228033	0.188792	0.130301	0.156024			768	167.867	133.33	103.25	92.3571	83.7857	72.4	76.0214			768	3.28229	4.22988	4.04885	3.90373	4.54862	3.02838	1.50624		768	0.018258	0.0236849	0.0236085	0.023199	0.0269742	0.0174154	0.00865588
704	123.8	88.49	55.3333	41.1571	35.7143	26.3583	32.1089		704	0.688649	0.495492	0.322643	0.244588	0.211793	0.151579	0.184519			704	168.344	133.52	106.1	95.1429	87.6643	76.1	80.98			704	3.50455	4.06609	3.93863	3.93056	4.7851	2.66198	1.608		704	0.0194944	0.0227678	0.0229658	0.0233585	0.0283766	0.0153082	0.00924063
640	124.644	89.47	59.05	44.6714	40.8857	30.625	37.6047		640	0.693347	0.50098	0.344315	0.265472	0.24246	0.176115	0.216102			640	169.189	134.5	109.817	98.6571	92.8357	80.3667	86.4759			640	3.67481	3.74529	3.98765	4.06086	4.81584	2.61254	2.11655		640	0.0204415	0.0209714	0.0232516	0.0241328	0.0285589	0.015024	0.0121631
576	125.789	91.6	63.8333	49.4714	47.0714	36	44.0581		576	0.699713	0.512907	0.372206	0.293998	0.279143	0.207025	0.253188			576	170.333	136.63	114.6	103.457	99.0214	85.7417	92.9293			576	3.79816	3.37626	4.26953	4.41069	4.83769	2.86929	2.93347		576	0.0211276	0.0189051	0.0248952	0.0262118	0.0286884	0.0165005	0.0168577
512	127.589	95.58	70.2167	56.3	54.9786	43.025	52.0117		512	0.709725	0.535192	0.409427	0.334578	0.326034	0.247424	0.298895			512	172.133	140.61	120.983	110.286	106.929	92.7667	100.883			512	3.86356	3.2744	4.74508	4.7901	4.82353	3.38277	3.93473		512	0.0214914	0.0183347	0.0276681	0.0284665	0.0286044	0.0194533	0.0226116
448	130.422	101.96	78.7	65.5	64.7571	53	62.2616		448	0.725486	0.570917	0.458892	0.389252	0.384022	0.304787	0.357797			448	174.967	146.99	129.467	119.486	116.707	102.742	111.133			448	3.88337	3.40988	5.31218	4.94882	4.70706	3.91451	4.86513		448	0.0216016	0.0190933	0.0309748	0.0294097	0.0279137	0.0225112	0.0279583
384	134.6	110.71	89.8333	77.2286	77.2357	66.5083	75.7219		384	0.748725	0.619912	0.52381	0.458952	0.458023	0.38247	0.435149			384	179.144	155.74	140.6	131.214	129.186	116.25	124.593			384	3.81439	3.68539	5.78677	4.72373	4.60029	4.38367	5.40073		384	0.0212179	0.020636	0.0337421	0.0280721	0.0272806	0.0252092	0.0310363
320	140.833	122.34	103.6	92.2	92.7071	84.25	92.5837		320	0.783399	0.685033	0.604082	0.547924	0.549771	0.484497	0.532049			320	185.378	167.37	154.367	146.186	144.657	133.992	141.455			320	3.60791	4.04395	5.87469	4.13459	4.27345	4.93306	5.47052		320	0.0200693	0.0226438	0.0342548	0.024571	0.0253424	0.0283686	0.0314373
256	148.956	136.09	119.867	109.8	110.964	105.667	112.57		256	0.828579	0.762025	0.698931	0.652517	0.65804	0.607658	0.646905			256	193.5	181.12	170.633	163.786	162.914	155.408	161.441			256	3.25274	4.48021	5.50866	3.33335	3.70788	5.50964	4.91898		256	0.0180937	0.0250866	0.0321205	0.0198093	0.0219884	0.0316843	0.0282678
192	158.344	150.82	137.333	129.214	130.593	128.683	133.946		192	0.880806	0.844504	0.800777	0.767892	0.774441	0.74002	0.769742			192	202.889	195.85	188.1	183.2	182.543	178.425	182.817			192	2.80441	4.81236	5.04816	2.7754	3.17643	5.56267	3.93657		192	0.0155998	0.0269464	0.0294353	0.0164936	0.0188369	0.0319893	0.0226222
128	168.111	164.3	153.6	147.757	149.321	150.425	153.749		128	0.935134	0.919984	0.895627	0.878088	0.885505	0.86505	0.883548			128	212.656	209.33	204.367	201.743	201.271	200.167	202.621			128	2.48474	5.02545	4.65843	2.70976	2.96983	5.08034	2.85892		128	0.0138216	0.0281396	0.0271628	0.0161035	0.0176117	0.0292155	0.0164293
64	175.961	174.54	166.233	161.886	163.293	166.767	168.333		64	0.9788	0.977322	0.969291	0.962051	0.968358	0.959026	0.967355			64	220.506	219.57	217	215.871	215.243	216.508	217.204			64	2.28198	4.58667	4.46119	2.83107	3.05232	3.95844	2.36142		64	0.0126937	0.0256827	0.0260128	0.0168245	0.0181009	0.0227638	0.0135703
0	179.772	178.59	171.5	168.271	168.629	173.892	174.014		0	1	1	1	1	1	1	1			0	224.317	223.62	222.267	222.257	220.579	223.633	222.885			0	2.15986	3.80341	4.0135	2.93458	3.24506	2.84699	2.96617		0	0.0120144	0.0212969	0.0234023	0.0174396	0.0192438	0.0163722	0.0170456
-64	177.161	174.35	166.883	164.157	162.35	169.4	168.458		-64	0.985475	0.976258	0.973081	0.97555	0.962767	0.97417	0.968075			-64	221.706	219.38	217.65	218.143	214.3	219.142	217.329			-64	1.98705	2.93999	3.24001	3.57233	3.18293	1.98734	3.84669		-64	0.0110531	0.0164622	0.0188922	0.0212296	0.0188754	0.0114286	0.0221057
-128	166.822	160.94	151.4	149.3	144.729	153.425	151.877		-128	0.927964	0.90117	0.882799	0.887257	0.858268	0.882302	0.872786			-128	211.367	205.97	202.167	203.286	196.679	203.167	200.748			-128	1.9416	2.53817	2.36663	4.70672	3.21327	1.42861	4.62559		-128	0.0108003	0.0142123	0.0137996	0.027971	0.0190553	0.00821552	0.0265818
-192	148.906	139.15	126.833	125.714	118.479	128.583	126.591		-192	0.828301	0.779159	0.739553	0.747092	0.702601	0.739445	0.727478			-192	193.45	184.18	177.6	179.7	170.429	178.325	175.462			-192	2.34435	2.55036	2.33238	5.83693	3.52662	1.69713	4.92973		-192	0.0130407	0.0142805	0.0135999	0.0346876	0.0209135	0.00975968	0.0283296
-256	125.056	111.88	97.4	97.4857	88.4214	99.3667	96.976		-256	0.695633	0.626463	0.56793	0.579336	0.524356	0.571429	0.55729			-256	169.6	156.91	148.167	151.471	140.371	149.108	145.847			-256	3.08322	2.86972	2.71023	6.39019	3.76936	2.53877	4.73972		-256	0.0171507	0.0160687	0.0158031	0.0379755	0.022353	0.0145997	0.0272376
-320	98.3333	83.18	68.2	69.1286	59.6929	70.6333	67.81		-320	0.546988	0.46576	0.397668	0.410816	0.35399	0.406192	0.389682			-320	142.878	128.21	118.967	123.114	111.643	120.375	116.681			-320	3.6968	3.16444	3.00866	6.13749	3.66193	3.22223	3.97228		-320	0.0205638	0.017719	0.0175432	0.0364737	0.021716	0.0185301	0.0228274
-384	71.9389	56.76	43.25	44.5571	35.9	46.1417	43.0867		-384	0.400167	0.317823	0.252187	0.264793	0.212894	0.265347	0.247605			-384	116.483	101.79	94.0167	98.5429	87.85	95.8833	91.9579			-384	3.8072	3.28537	3.0054	5.28679	3.19469	3.40982	2.88496		-384	0.0211779	0.0183962	0.0175242	0.0314182	0.0189451	0.0196089	0.0165789
-448	48.6667	35.34	25.0333	25.8429	18.5071	27.4917	24.619		-448	0.270713	0.197883	0.145967	0.153578	0.109751	0.158097	0.141477			-448	93.2111	80.37	75.8	79.8286	70.4571	77.2333	73.4901			-448	3.44108	3.14832	2.62128	4.3111	2.534	3.44461	1.85077		-448	0.0191413	0.0176288	0.0152844	0.0256199	0.0150271	0.019809	0.0106358
-512	30.35	19.77	13	13.4	7.14286	15.1917	12.8614		-512	0.168825	0.1107	0.0758017	0.0796332	0.0423585	0.0873628	0.0739105			-512	74.8944	64.8	63.7667	67.3857	59.0929	64.9333	61.7326			-512	2.81335	2.73115	2.20525	3.36903	1.98387	3.19711	1.40486		-512	0.0156496	0.0152929	0.0128586	0.0200214	0.0117648	0.0183856	0.0080733
-576	17.1833	9.64	6.43333	6.05714	0.928571	7.75833	6.45114		-576	0.0955839	0.0539784	0.0375121	0.0359963	0.00550661	0.0446159	0.0370726			-576	61.7278	54.67	57.2	60.0429	52.8786	57.5	55.3223			-576	2.1582	2.24907	1.93333	2.79444	1.53496	2.97013	1.54807		-576	0.0120052	0.0125935	0.0112731	0.0166068	0.00910262	0.0170803	0.00889624
-640	8.77778	3.79	3.13333	2.34286	-2	3.89167	3.64814		-640	0.0488272	0.0212218	0.0182702	0.0139231	-0.0118604	0.0223798	0.0209647			-640	53.3222	48.82	53.9	56.3286	49.95	53.6333	52.5193			-640	1.65111	1.83181	1.80908	2.51044	1.3189	2.76784	1.72581		-640	0.00918448	0.0102571	0.0105486	0.014919	0.00782132	0.015917	0.00991769
-704	3.94444	0.85	1.73333	0.828571	-2.67143	2.01667	2.47743		-704	0.0219413	0.00475951	0.0101069	0.00492402	-0.0158421	0.0115973	0.014237			-704	48.4889	45.88	52.5	54.8143	49.2786	51.7583	51.3486			-704	1.33287	1.52693	1.98032	2.29271	1.2039	2.48155	1.7208		-704	0.00741419	0.00854993	0.0115471	0.013625	0.00713935	0.0142707	0.00988887
-768	1.74444	-0.06	1.31667	0.271429	-2.4	0.941667	1.61386		-768	0.00970364	-0.000335965	0.00767736	0.00161304	-0.0142325	0.00541525	0.00927432			-768	46.2889	44.97	52.0833	54.2571	49.55	50.6833	50.485			-768	1.25122	1.40083	2.24875	2.15935	1.21643	2.4311	1.49475		-768	0.00696001	0.00784382	0.0131123	0.0128325	0.00721365	0.0139805	0.00858984
-832	0.983333	-0.12	0.933333	0	-1.66429	0.483333	0.863857		-832	0.00546988	-0.00067193	0.00544218	0	-0.00986954	0.00277951	0.00496431			-832	45.5278	44.91	51.7	53.9857	50.2857	50.225	49.735			-832	1.36382	1.34524	2.24239	2.22806	1.27958	2.39687	1.22843		-832	0.00758638	0.00753258	0.0130752	0.0132409	0.00758814	0.0137837	0.00705939
-896	0.933333	-0.04	0.716667	-0.285714	-0.885714	0.025	0		-896	0.00519175	-0.000223977	0.00417881	-0.00169794	-0.00525246	0.000143768	0			-896	45.4778	44.99	51.4833	53.7	51.0643	49.7667	48.8711			-896	1.61475	1.41084	2.15747	2.41162	1.30567	2.43101	1.02759		-896	0.00898219	0.0078999	0.01258	0.0143317	0.00774286	0.01398	0.00590526
-960	1.2	0.06	0.433333	-0.885714	-0.25	-0.316667	-0.656571		-960	0.00667511	0.000335965	0.00252672	-0.0052636	-0.00148255	-0.00182106	-0.0037731			-960	45.7444	45.09	51.2	53.1	51.7	49.425	48.2146			-960	1.79424	1.46645	1.74356	2.52425	1.44547	2.38292	0.971213		-960	0.00998061	0.00821127	0.0101665	0.0150011	0.00857192	0.0137035	0.00558125
-1024	1.22778	0	0.133333	-1.41429	0.0785714	-0.783333	-0.713571		-1024	0.00682963	0	0.000777454	-0.00840479	0.000465944	-0.00450472	-0.00410067			-1024	45.7722	45.03	50.9	52.5714	52.0286	48.9583	48.1576			-1024	1.80835	1.62552	1.4543	2.61968	1.73308	2.25396	1.01798		-1024	0.0100591	0.00910197	0.00847991	0.0155682	0.0102775	0.0129619	0.00585
-1088	1.09444	-0.34	0.116667	-1.74286	0.1	-1.35	-0.442286		-1088	0.00608795	-0.0019038	0.000680272	-0.0103574	0.000593019	-0.00776345	-0.00254167			-1088	45.6389	44.69	50.8833	52.2429	52.05	48.3917	48.4289			-1088	1.67241	1.76864	1.33467	2.52011	2.0851	2.26901	1.06187		-1088	0.00930295	0.00990334	0.00778233	0.0149765	0.0123651	0.0130484	0.00610224
-1152	0.805556	-0.52	0	-1.87143	0	-1.6	0.335857		-1152	0.00448098	-0.0029117	0	-0.0111215	0	-0.00920113	0.00193006			-1152	45.35	44.51	50.7667	52.1143	51.95	48.1417	49.207			-1152	1.38976	2.00442	1.75272	2.44277	2.34375	2.40637	1.14154		-1152	0.00773065	0.0112236	0.01022	0.0145168	0.0138989	0.0138383	0.00656006
-1216	0.327778	-0.56	0.233333	-1.47143	-0.278571	-1.61667	0.877429		-1216	0.00182329	-0.00313567	0.00136054	-0.00874438	-0.00165198	-0.00929698	0.0050423			-1216	44.8722	44.47	51	52.5143	51.6714	48.125	49.7486			-1216	1.13028	2.15831	2.35278	2.46406	2.44888	2.48902	1.16098		-1216	0.0062873	0.0120853	0.0137188	0.0146434	0.0145223	0.0143137	0.00667179
-1280	-0.0666667	-0.75	0.166667	-1.07143	-0.457143	-1.56667	1.39814		-1280	-0.00037084	-0.00419956	0.000971817	-0.00636726	-0.00271095	-0.00900944	0.00803468			-1280	44.4778	44.28	50.9333	52.9143	51.4929	48.175	50.2693			-1280	1.04463	2.26387	2.89239	2.76859	2.39328	2.56092	1.09166		-1280	0.00581083	0.0126764	0.0168653	0.0164531	0.0141926	0.0147271	0.00627343
-1344	-0.361111	-0.72	0.0333333	0.0571429	-0.764286	-1.34167	1.534		-1344	-0.00200871	-0.00403158	0.000194363	0.000339587	-0.00453236	-0.00771553	0.0088154			-1344	44.1833	44.31	50.8	54.0429	51.1857	48.4	50.4051			-1344	1.10314	2.22982	3.3964	3.11388	2.43599	2.68121	1.02038		-1344	0.00613631	0.0124857	0.0198041	0.0185051	0.0144459	0.0154189	0.00586378
-1408	-0.488889	-0.52	-0.183333	0.957143	-0.557143	-1.09167	1.31457		-1408	-0.00271949	-0.0029117	-0.001069	0.00568809	-0.00330396	-0.00627785	0.00755442			-1408	44.0556	44.51	50.5833	54.9429	51.3929	48.65	50.1857			-1408	1.28006	2.06748	3.69883	3.33637	2.50384	2.81403	0.934962		-1408	0.00712044	0.0115767	0.0215675	0.0198273	0.0148483	0.0161826	0.00537293
-1472	-0.327778	-0.25	-0.566667	1.81429	-0.285714	-0.808333	0.772429		-1472	-0.00182329	-0.00139985	-0.00330418	0.0107819	-0.00169434	-0.00464849	0.0044389			-1472	44.2167	44.78	50.2	55.8	51.6643	48.9333	49.6436			-1472	1.34644	1.90124	3.83058	3.35881	2.60754	2.95209	0.918536		-1472	0.0074897	0.0106458	0.0223357	0.0199607	0.0154632	0.0169766	0.00527853
-1536	-0.283333	-0.07	-0.833333	2.17143	0.0571429	-0.425	-0.006		-1536	-0.00157607	-0.000391959	-0.00485909	0.0129043	0.000338868	-0.00244405	-3.44801e-05			-1536	44.2611	44.96	49.9333	56.1571	52.0071	49.3167	48.8651			-1536	1.37692	1.78653	3.72489	3.2403	2.64275	3.12503	0.966775		-1536	0.00765925	0.0100035	0.0217195	0.0192564	0.015672	0.0179711	0.00555574
-1600	-0.116667	0.39	-1.25	1.97143	0.25	-0.358333	-0.686286		-1600	-0.000648969	0.00218377	-0.00728863	0.0117158	0.00148255	-0.00206067	-0.00394386			-1600	44.4278	45.42	49.5167	55.9571	52.2	49.3833	48.1849			-1600	1.36597	1.68722	3.41894	2.97169	2.57547	3.18315	1.16578		-1600	0.00759833	0.00944746	0.0199355	0.0176601	0.0152731	0.0183054	0.00669939
-1664	0.0277778	0.47	-1.56667	1.47143	0.392857	0	-1.38443		-1664	0.000154517	0.00263173	-0.00913508	0.00874438	0.00232972	0	-0.00795587			-1664	44.5722	45.5	49.2	55.4571	52.3429	49.7417	47.4867			-1664	1.34141	1.70693	2.88059	2.73592	2.40534	3.15851	1.50581		-1664	0.00746174	0.0095578	0.0167964	0.016259	0.0142641	0.0181637	0.00865343
-1728	0	1.02	-2.05	0.857143	0.542857	0.608333	-1.83486		-1728	0	0.00571141	-0.0119534	0.00509381	0.00321925	0.00349835	-0.0105443			-1728	44.5444	46.05	48.7167	54.8429	52.4929	50.35	47.0363			-1728	1.24356	1.67964	2.15592	2.70825	2.28483	3.05884	1.77266		-1728	0.00691743	0.00940502	0.012571	0.0160946	0.0135495	0.0175905	0.0101869
-1792	-0.194444	1.32	-2.68333	0.185714	0.578571	1.19167	-2.089		-1792	-0.00108162	0.00739123	-0.0156463	0.00110366	0.00343104	0.00685293	-0.0120048			-1792	44.35	46.35	48.0833	54.1714	52.5286	50.9333	46.7821			-1792	1.13893	1.75442	1.57452	2.87294	2.26226	2.81609	2.06596		-1792	0.0063354	0.00982375	0.00918089	0.0170732	0.0134157	0.0161945	0.0118724
-1856	-0.527778	1.62	-3.3	-0.442857	0.928571	1.93333	-2.005		-1856	-0.00293581	0.00907106	-0.019242	-0.0026318	0.00550661	0.011118	-0.0115221			-1856	44.0167	46.65	47.4667	53.5429	52.8786	51.675	46.8661			-1856	1.04934	1.78	1.11122	3.06952	2.26427	2.51235	2.25503		-1856	0.00583704	0.00996696	0.00647943	0.0182415	0.0134276	0.0144478	0.0129589
-1920	-0.844444	1.98	-3.8	-0.857143	1.24286	2.45	-1.429		-1920	-0.0046973	0.0110868	-0.0221574	-0.00509381	0.00737038	0.0140892	-0.008212			-1920	43.7	47.01	46.9667	53.1286	53.1929	52.1917	47.4421			-1920	1.05617	1.76388	0.782328	3.12493	2.29143	2.16065	2.49465		-1920	0.00587504	0.00987671	0.00456168	0.0185708	0.0135886	0.0124252	0.014336
-1984	-1.08333	2.54	-4.06667	-1.34286	1.6	2.725	-0.758286		-1984	-0.00602614	0.0142225	-0.0237123	-0.0079803	0.00948831	0.0156707	-0.00435762			-1984	43.4611	47.57	46.7	52.6429	53.55	52.4667	48.1129			-1984	1.18191	1.65261	0.731437	3.18003	2.26209	1.80903	2.76661		-1984	0.00657446	0.00925365	0.00426494	0.0188982	0.0134146	0.0104032	0.0158988
-2048	-1.06667	2.98	-4.18333	-1.74286	1.97857	2.76667	0.0512857		-2048	-0.00593343	0.0166863	-0.0243926	-0.0103574	0.0117333	0.0159103	0.000294722			-2048	43.4778	48.01	46.5833	52.2429	53.9286	52.5083	48.9224			-2048	1.34681	1.51343	0.892069	3.1682	2.19617	1.49101	2.92389		-2048	0.00749176	0.00847434	0.00520157	0.0188279	0.0130237	0.00857437	0.0168027
-2112	-0.6	3.56	-3.9	-2	2.24286	2.45833	0.764429		-2112	-0.00333756	0.0199339	-0.0227405	-0.0118856	0.0133006	0.0141372	0.00439293			-2112	43.9444	48.59	46.8667	51.9857	54.1929	52.2	49.6356			-2112	1.56077	1.33659	1.05163	3.16721	1.99373	1.42205	2.95876		-2112	0.00868195	0.00748414	0.00613195	0.018822	0.0118232	0.00817778	0.017003
-2176	-0.0833333	3.86	-3.4	-2.17143	2.32143	1.98333	1.18629		-2176	-0.00046355	0.0216138	-0.0198251	-0.0129043	0.0137665	0.0114056	0.0068172			-2176	44.4611	48.89	47.3667	51.8143	54.2714	51.725	50.0574			-2176	1.70112	1.3732	1.25469	3.10828	1.74832	1.32213	2.87204		-2176	0.00946265	0.00768912	0.00731601	0.0184718	0.0103679	0.00760317	0.0165047
-2240	0.472222	3.95	-2.35	-2.41429	2.20714	1.31667	1.45286		-2240	0.00262678	0.0221177	-0.0137026	-0.0143476	0.0130888	0.00757176	0.0083491			-2240	45.0167	48.98	48.4167	51.5714	54.1571	51.0583	50.324			-2240	1.68572	1.6021	1.58016	2.90177	1.43255	1.15352	2.68529		-2240	0.009377	0.00897082	0.00921375	0.0172446	0.00849527	0.00663357	0.0154315
-2304	0.655556	4.03	-1.46667	-2.42857	1.57857	0.325	1.63557		-2304	0.00364659	0.0225657	-0.00855199	-0.0144325	0.00936123	0.00186898	0.0093991			-2304	45.2	49.06	49.3	51.5571	53.5286	50.0667	50.5067			-2304	1.6105	1.76445	1.93664	2.52513	1.14548	0.983945	2.55635		-2304	0.00895855	0.00987989	0.0112923	0.0150063	0.00679293	0.00565838	0.0146905
-2368	0.711111	3.81	-0.5	-2.3	0.728571	-0.808333	1.68014		-2368	0.00395562	0.0213338	-0.00291545	-0.0136684	0.00432057	-0.00464849	0.00965524			-2368	45.2556	48.84	50.2667	51.6857	52.6786	48.9333	50.5513			-2368	1.46073	2.0454	2.17647	2.13804	1.04617	0.800925	2.45087		-2368	0.00812545	0.0114531	0.0126908	0.0127059	0.006204	0.00460589	0.0140844
-2432	0.616667	3.68	0.3	-2.27143	-0.257143	-1.66667	1.65843		-2432	0.00343027	0.0206059	0.00174927	-0.0134986	-0.00152491	-0.00958451	0.00953046			-2432	45.1611	48.71	51.0667	51.7143	51.6929	48.075	50.5296			-2432	1.27492	2.42983	2.34173	1.81405	1.11988	0.978502	2.42477		-2432	0.00709186	0.0136056	0.0136544	0.0107805	0.00664109	0.00562708	0.0139344
-2496	0.366667	3.72	0.7	-2.22857	-1.45714	-2.35	1.525		-2496	0.00203962	0.0208298	0.00408163	-0.0132439	-0.00864114	-0.0135142	0.00876368			-2496	44.9111	48.75	51.4667	51.7571	50.4929	47.3917	50.3961			-2496	1.08667	2.92787	2.42792	1.60812	1.26952	1.37358	2.3397		-2496	0.0060447	0.0163943	0.014157	0.00955673	0.00752849	0.00789906	0.0134455

## Sheet: Fig 1 Fig Sup 3 C
									absolute Difference between Mal3 and normalized background subtracted								Sum of absolute difference
Position	.125x normalized back subtract average	.25x normalized back subtract average	.5x normalized back subtract average	1x normalized back subtract average	2x normalized back subtract average	4x normalized back subtract average	8x normalized back subtract average	Mal3 from Beiling et al. 2007	.125x and Beiling absolute difference	.25x and Beiling absolute difference	.5x and Beiling absolute difference	1x and Beiling absolute difference	2x and Beiling absolute difference	4x and Beiling absolute difference	8x and Beiling absolute difference			0.125X	.25X	.5X	1X	2X	4X	8X
2048	0.145276	0.29313	0.135763	0.01647	0.00817519	0.0184023	0.0368682	0.102589	0.0426871	0.19054	0.0331735	0.0861194	0.0944142	0.0841871	0.0657211			5.75321	4.11981	1.62751	0.941602	0.883568	1.23865	1.04869
1856	0.208566	0.329918	0.172012	0.0234315	0.0344798	0.0332583	0.0369963	0.102682	0.105885	0.227236	0.0693298	0.0792503	0.068202	0.0694236	0.0656856
1728	0.273865	0.342012	0.198251	0.032091	0.0510844	0.0332103	0.0338972	0.105966	0.167899	0.236046	0.0922847	0.073875	0.0548816	0.0727557	0.0720688
1536	0.410427	0.391623	0.222643	0.064182	0.0698916	0.041453	0.0286989	0.0997169	0.31071	0.291906	0.122926	0.0355349	0.0298254	0.0582639	0.071018
1408	0.506721	0.426788	0.226822	0.0942355	0.0821332	0.0573154	0.0295379	0.131596	0.375125	0.295192	0.0952262	0.0373605	0.0494628	0.0742806	0.102058				GDP Lattice off rate	Sum of absolute error
1216	0.622362	0.447505	0.231876	0.137703	0.103736	0.0731298	0.0359299	0.147586	0.474775	0.299919	0.0842892	0.00988371	0.0438504	0.0744566	0.111657				0.416667	5.75321
1088	0.665503	0.463296	0.243732	0.165719	0.123052	0.0763886	0.0531289	0.160394	0.505108	0.302901	0.0833373	0.00532419	0.037343	0.0840059	0.107266				0.833333	4.11981
896	0.682901	0.489053	0.277357	0.203498	0.15554	0.0976662	0.106968	0.163683	0.519218	0.32537	0.113673	0.0398145	0.00814271	0.066017	0.0567154				1.66667	1.62751
704	0.688649	0.495492	0.322643	0.244588	0.211793	0.151579	0.184519	0.201913	0.486736	0.293579	0.12073	0.0426747	0.0098795	0.0503341	0.0173938				3.33333	0.941602
512	0.709725	0.535192	0.409427	0.334578	0.326034	0.247424	0.298895	0.306917	0.402808	0.228275	0.10251	0.0276615	0.0191165	0.0594928	0.00802241				6.66667	0.883568
448	0.725486	0.570917	0.458892	0.389252	0.384022	0.304787	0.357797	0.364176	0.36131	0.20674	0.0947158	0.0250758	0.0198461	0.0593888	0.00637907				13.3333	1.23865
384	0.748725	0.619912	0.52381	0.458952	0.458023	0.38247	0.435149	0.440493	0.308233	0.179419	0.0833168	0.0184597	0.01753	0.0580228	0.00534356				26.6667	1.04869
320	0.783399	0.685033	0.604082	0.547924	0.549771	0.484497	0.532049	0.526328	0.25707	0.158704	0.0777532	0.0215958	0.0234428	0.0418314	0.00572037
256	0.828579	0.762025	0.698931	0.652517	0.65804	0.607658	0.646905	0.612146	0.216434	0.149879	0.0867853	0.0403715	0.045894	0.00448766	0.0347595
192	0.880806	0.844504	0.800777	0.767892	0.774441	0.74002	0.769742	0.691631	0.189175	0.152874	0.109147	0.0762614	0.0828103	0.0483895	0.0781115
128	0.935134	0.919984	0.895627	0.878088	0.885505	0.86505	0.883548	0.898243	0.0368907	0.0217411	0.00261641	0.0201551	0.0127383	0.0331931	0.0146947
64	0.9788	0.977322	0.969291	0.962051	0.968358	0.959026	0.967355	0.965008	0.0137924	0.0123144	0.00428262	0.00295685	0.00335023	0.00598174	0.00234681
0	1	1	1	1	1	1	1	1	0	0	0	0	0	0	0
-64	0.985475	0.976258	0.973081	0.97555	0.962767	0.97417	0.968075	0.955549	0.0299267	0.0207097	0.0175319	0.0200009	0.00721809	0.018621	0.012526
-128	0.927964	0.90117	0.882799	0.887257	0.858268	0.882302	0.872786	0.863436	0.0645282	0.0377341	0.0193626	0.0238208	0.00516782	0.018866	0.00934958
-192	0.828301	0.779159	0.739553	0.747092	0.702601	0.739445	0.727478	0.761781	0.0665201	0.0173778	0.0222282	0.0146889	0.0591804	0.0223361	0.0343035
-256	0.695633	0.626463	0.56793	0.579336	0.524356	0.571429	0.55729	0.482201	0.213432	0.144262	0.085729	0.0971351	0.0421551	0.0892276	0.0750889
-320	0.546988	0.46576	0.397668	0.410816	0.35399	0.406192	0.389682	0.329702	0.217286	0.136057	0.0679653	0.0811136	0.0242879	0.0764893	0.0599799
-384	0.400167	0.317823	0.252187	0.264793	0.212894	0.265347	0.247605	0.237576	0.162591	0.0802471	0.0146107	0.0272174	0.0246819	0.0277713	0.0100296
-448	0.270713	0.197883	0.145967	0.153578	0.109751	0.158097	0.141477	0.148646	0.122067	0.0492378	0.00267869	0.00493275	0.0388947	0.00945087	0.00716818
-512	0.168825	0.1107	0.0758017	0.0796332	0.0423585	0.0873628	0.0739105	0.0660802	0.102745	0.0446203	0.0097216	0.0135531	0.0237216	0.0212827	0.00783034
-704	0.0219413	0.00475951	0.0101069	0.00492402	-0.0158421	0.0115973	0.014237	0.0216891	0.000252291	0.0169295	0.0115822	0.016765	0.0375311	0.0100918	0.00745207

## Sheet: Fig 1 Fig Sup 3 D,E
Fig 1 Sup Fig 3 D	Background subtracted								Fig 1 Sup Fig 3 E	normalized background subtracted									averages										std error									normalized std error
Position	.125x back subtract average	.25x back subtract average	.5x back subtract average	1x back subtract average	2x back subtract average	4x back subtract average	8x back subtract average		position	.125x normalized back subtract average	.25x normalized back subtract average	.5x normalized back subtract average	1x normalized back subtract average	2x normalized back subtract average	4x normalized back subtract average	8x normalized back subtract average			position	.125x average	.25x average	.5x average	1x average	2x average	4x average	8x average			Position	.125x std error	.25x std error	.5x std error	1x std error	2x std error	4x std error	8x std error	0	position	.125x normalized standard error	.25x normalized standard error	.5x normalized standard error	1x normalized standard error	2x normalized standard error	4x normalized standard error	8x normalized standard error
2496	7.11111	17.6083	10.35	2.00714	5.4375	2.08	3.11667		2496	0.0383394	0.0979057	0.0568213	0.0115183	0.037594	0.0155224	0.0269686			2496	48.0722	64.125	56	54.75	59.1375	54.52	56.4167			2496	3.87387	2.63064	5.8894	3.76846	3.56638	1.82744	4.64091		2496	0.0208859	0.0146268	0.0323327	0.0216259	0.0246573	0.0136376	0.0401578
2432	7.31667	17.3417	10.7	2.05	5.8625	2.84	2.88333		2432	0.0394477	0.0964229	0.0587428	0.0117642	0.0405324	0.021194	0.0249495			2432	48.2778	63.8583	56.35	54.7929	59.5625	55.28	56.1833			2432	3.75173	2.50855	5.74429	4.26675	3.44065	1.74961	4.51494		2432	0.0202274	0.013948	0.031536	0.0244854	0.0237881	0.0130568	0.0390678
2368	7.57778	16.925	10.65	2.38571	6.125	3.84	2.55		2368	0.0408554	0.0941062	0.0584683	0.0136908	0.0423472	0.0286567	0.0220652			2368	48.5389	63.4417	56.3	55.1286	59.825	56.28	55.85			2368	3.72434	2.47326	5.53602	4.53597	3.25925	1.87326	4.28069		2368	0.0200797	0.0137518	0.0303926	0.0260303	0.0225339	0.0139796	0.0370409
2304	8.31111	17.1083	10.9	3.15	6.2875	5.12	1.95		2304	0.0448092	0.0951256	0.0598408	0.0180767	0.0434707	0.038209	0.0168734			2304	49.2722	63.625	56.55	55.8929	59.9875	57.56	55.25			2304	3.78898	2.52377	5.50335	4.61389	3.1127	2.66677	4.21583		2304	0.0204282	0.0140326	0.0302133	0.0264775	0.0215207	0.0199013	0.0364796
2240	9.21667	17.4583	11.35	4.36429	6.3375	6.84	1.85		2240	0.0496915	0.0970716	0.0623113	0.0250451	0.0438164	0.0510448	0.0160081			2240	50.1778	63.975	57	57.1071	60.0375	59.28	55.15			2240	3.79196	2.68803	5.505	4.35075	3.00109	3.86103	4.18421		2240	0.0204443	0.014946	0.0302223	0.0249674	0.020749	0.0288136	0.0362061
2176	10.3222	17.8917	11.95	5.87143	6.5	8.84	2.06667		2176	0.0556521	0.099481	0.0656053	0.033694	0.0449399	0.0659701	0.0178829			2176	51.2833	64.4083	57.6	58.6143	60.2	61.28	55.3667			2176	3.81035	2.84811	5.47494	3.87701	2.81219	4.79086	4.47323		2176	0.0205434	0.015836	0.0300573	0.0222488	0.0194431	0.0357527	0.0387069
2112	11.5833	18.5167	12.5	7.38571	7.0625	10.56	2.4		2112	0.0624513	0.102956	0.0686248	0.042384	0.048829	0.078806	0.0207672			2112	52.5444	65.0333	58.15	60.1286	60.7625	63	55.7			2112	3.75799	2.95876	5.471	3.32674	2.57906	5.38085	4.72341		2112	0.0202611	0.0164513	0.0300357	0.019091	0.0178312	0.0401556	0.0408717
2048	12.6389	19.0417	13.1	9.49286	8.35	12.44	3.35		2048	0.0681423	0.105875	0.0719187	0.0544761	0.0577305	0.0928358	0.0289876			2048	53.6	65.5583	58.75	62.2357	62.05	64.88	56.65			2048	3.55163	2.88748	5.36161	2.72728	2.34007	5.66833	4.85316		2048	0.0191485	0.016055	0.0294351	0.0156509	0.0161789	0.0423009	0.0419945
1984	13.8167	19.3083	13.3	11.6571	10.3	14	4.5		1984	0.0744923	0.107358	0.0730167	0.0668962	0.0712125	0.104478	0.0389386			1984	54.7778	65.825	58.95	64.4	64	66.44	57.8			1984	3.26511	2.52883	5.02463	2.33168	2.27136	5.63969	4.7013		1984	0.0176038	0.0140608	0.0275851	0.0133807	0.0157038	0.0420872	0.0406804
1920	14.8833	20.0917	13.7	14.15	12.575	15.4	5.6		1920	0.0802432	0.111713	0.0752127	0.0812018	0.0869415	0.114925	0.0484569			1920	55.8444	66.6083	59.35	66.8929	66.275	67.84	58.9			1920	3.04112	1.97331	4.77094	2.12604	2.51897	5.53892	4.28868		1920	0.0163962	0.010972	0.0261924	0.0122006	0.0174158	0.0413353	0.03711
1856	16.0056	20.8	14.05	16.7214	14.925	16.36	6.8		1856	0.0862937	0.115652	0.0771342	0.0959584	0.103189	0.12209	0.0588405			1856	56.9667	67.3167	59.7	69.4643	68.625	68.8	60.1			1856	2.84614	1.48818	4.44888	2.35499	2.91198	5.65685	3.74692		1856	0.0153449	0.00827456	0.0244242	0.0135145	0.0201329	0.0422153	0.0324222
1792	17.1667	21.9917	14.75	19.2857	16.875	16.84	8.11667		1792	0.0925538	0.122278	0.0809772	0.110674	0.116671	0.125672	0.0702336			1792	58.1278	68.5083	60.4	72.0286	70.575	69.28	61.4167			1792	2.70246	1.49529	4.21129	2.75427	3.19515	5.87431	3.34966		1792	0.0145703	0.00831409	0.0231199	0.0158058	0.0220907	0.0438381	0.0289847
1728	18.1833	23.325	15.5	21.5714	18.3875	17.12	9.86667		1728	0.0980351	0.129691	0.0850947	0.123791	0.127128	0.127761	0.0853764			1728	59.1444	69.8417	61.15	74.3143	72.0875	69.56	63.1667			1728	2.54559	2.04214	3.93343	3.32206	3.31184	6.20101	3.30771		1728	0.0137245	0.0113547	0.0215945	0.0190641	0.0228975	0.0462762	0.0286216
1664	19.0056	24.4583	16.2	23.7929	19.3	17	11.85		1664	0.102468	0.135993	0.0889377	0.136539	0.133437	0.126866	0.102538			1664	59.9667	70.975	61.85	76.5357	73	69.44	65.15			1664	2.36236	2.69031	3.45063	3.80983	3.20132	6.21389	3.45975		1664	0.0127366	0.0149586	0.0189439	0.0218632	0.0221334	0.0463723	0.0299373
1600	19.8111	25.5917	17.1	25.5571	19.925	17.44	14.1667		1600	0.106811	0.142295	0.0938787	0.146663	0.137758	0.130149	0.122584			1600	60.7722	72.1083	62.75	78.3	73.625	69.88	67.4667			1600	2.21601	3.36267	2.95582	4.19363	3.02421	5.89172	3.54045		1600	0.0119476	0.0186971	0.0162274	0.0240658	0.0209089	0.043968	0.0306356
1536	20.2	26.3833	17.65	26.8643	20.2125	18.48	16.3833		1536	0.108908	0.146696	0.0968982	0.154165	0.139746	0.13791	0.141765			1536	61.1611	72.9	63.3	79.6071	73.9125	70.92	69.6833			1536	2.18273	3.70488	2.31679	4.31696	2.86528	5.27563	3.4165		1536	0.0117681	0.0205998	0.0127191	0.0247735	0.0198101	0.0393704	0.029563
1472	20.8167	26.9583	18.7	27.65	20.4	20.2	18.6667		1472	0.112233	0.149893	0.102663	0.158674	0.141042	0.150746	0.161523			1472	61.7778	73.475	64.35	80.3929	74.1	72.64	71.9667			1472	2.20643	3.87266	1.92143	4.07371	2.95614	4.44681	3.33447		1472	0.0118959	0.0215327	0.0105486	0.0233776	0.0204383	0.0331851	0.0288532
1408	21.4611	27.5333	20.2	28.1286	20.5	22.56	20.6667		1408	0.115707	0.153091	0.110898	0.16142	0.141734	0.168358	0.178829			1408	62.4222	74.05	65.85	80.8714	74.2	75	73.9667			1408	2.26442	3.84691	1.8633	3.62208	3.25749	3.76765	3.30636		1408	0.0122086	0.0213896	0.0102295	0.0207858	0.0225218	0.0281168	0.02861
1344	22.2889	28	21.85	28.5643	20.725	25.04	22.5		1344	0.12017	0.155685	0.119956	0.16392	0.143289	0.186866	0.194693			1344	63.25	74.5167	67.5	81.3071	74.425	77.48	75.8			1344	2.33397	3.59911	2.24109	2.97329	3.67188	3.37501	3.31227		1344	0.0125835	0.0200117	0.0123036	0.0170627	0.0253868	0.0251867	0.0286611
1280	23.4667	28.475	23.85	29.4571	21.1125	27.44	23.9833		1280	0.12652	0.158326	0.130936	0.169044	0.145968	0.204776	0.207528			1280	64.4278	74.9917	69.5	82.2	74.8125	79.88	77.2833			1280	2.31321	3.2533	2.94661	2.3977	4.05973	3.32101	3.24657		1280	0.0124716	0.018089	0.0161768	0.0137596	0.0280683	0.0247837	0.0280926
1216	24.9167	28.675	26	30.3571	21.65	29.28	25.35		1216	0.134338	0.159438	0.14274	0.174209	0.149685	0.218507	0.219354			1216	65.8778	75.1917	71.65	83.1	75.35	81.72	78.65			1216	2.2525	2.97023	3.78376	2.11458	4.21066	3.56454	3.05812		1216	0.0121443	0.0165151	0.0207728	0.0121348	0.0291118	0.026601	0.0264619
1152	26.5556	28.975	28.25	31.4929	22.25	30.8	26.6167		1152	0.143174	0.161106	0.155092	0.180726	0.153833	0.229851	0.230314			1152	67.5167	75.4917	73.9	84.2357	75.95	83.24	79.9167			1152	2.1516	2.7612	4.47744	2.31152	4.07232	3.6658	3.06924		1152	0.0116003	0.0153528	0.0245811	0.013265	0.0281553	0.0273567	0.0265582
1088	28.3889	29.5833	30.2	32.6571	23.0625	32.08	27.8167		1088	0.153058	0.164489	0.165797	0.187408	0.15945	0.239403	0.240698			1088	69.35	76.1	75.85	85.4	76.7625	84.52	81.1167			1088	2.07406	2.62329	4.66121	2.76221	3.83063	3.66152	3.23096		1088	0.0111823	0.014586	0.02559	0.0158513	0.0264844	0.0273248	0.0279576
1024	30.2222	30.6917	32.05	33.4143	24.0875	32.68	28.95		1024	0.162943	0.170651	0.175954	0.191753	0.166537	0.243881	0.250505			1024	71.1833	77.2083	77.7	86.1571	77.7875	85.12	82.25			1024	2.16199	2.60481	4.27229	3.08901	3.48059	3.51845	3.52276		1024	0.0116563	0.0144833	0.0234548	0.0177267	0.0240642	0.0262571	0.0304825
960	31.9556	32.5167	34.25	33.8143	25.5125	33	29.8333		960	0.172288	0.180799	0.188032	0.194048	0.176389	0.246269	0.258148			960	72.9167	79.0333	79.9	86.5571	79.2125	85.44	83.1333			960	2.35519	2.74	3.33579	3.18747	3.1145	3.46059	3.87662		960	0.012698	0.0152349	0.0183134	0.0182917	0.0215332	0.0258253	0.0335444
896	34.0611	34.8	36.6	34.3143	27.5	33.8	30.3		896	0.18364	0.193495	0.200933	0.196918	0.19013	0.252239	0.262186			896	75.0222	81.3167	82.25	87.0571	81.2	86.24	83.6			896	2.71597	3.01574	2.33707	3.15206	2.81175	3.59083	3.9101		896	0.0146431	0.0167681	0.0128304	0.0180885	0.01944	0.0267973	0.0338342
832	36.5278	37.3333	39.95	35.0286	30.075	34.68	31.0667		832	0.196939	0.20758	0.219325	0.201017	0.207934	0.258806	0.26882			832	77.4889	83.85	85.6	87.7714	83.775	87.12	84.3667			832	3.12649	3.21798	1.52807	2.89212	2.75231	4.08572	3.80334		832	0.0168564	0.0178926	0.00838908	0.0165969	0.0190291	0.0304905	0.0329103
768	39.8167	39.7833	43.85	36.5714	32.9875	36.24	32.4		768	0.214671	0.221203	0.240736	0.20987	0.22807	0.270448	0.280358			768	80.7778	86.3	89.5	89.3143	86.6875	88.68	85.7			768	3.60595	3.27914	1.31244	2.59044	2.79058	4.41438	3.52192		768	0.0194414	0.0182327	0.00720527	0.0148656	0.0192936	0.0329431	0.0304752
704	43.6556	42.3417	48.25	38.8714	36.2	38.68	34.6167		704	0.235368	0.235428	0.264892	0.223069	0.250281	0.288657	0.299539			704	84.6167	88.8583	93.9	91.6143	89.9	91.12	87.9167			704	3.98907	3.22422	1.65	2.38297	2.95323	4.89264	3.12254		704	0.021507	0.0179273	0.00905847	0.013675	0.0204181	0.0365122	0.0270193
640	48.5722	45.5	53.05	42.4143	39.75	42.44	38.05		640	0.261876	0.252989	0.291243	0.243401	0.274825	0.316716	0.329247			640	89.5333	92.0167	98.7	95.1571	93.45	94.88	91.35			640	4.29335	3.25256	2.09464	2.41305	3.04775	5.33505	2.96664		640	0.0231475	0.0180848	0.0114995	0.0138476	0.0210716	0.0398138	0.0256704
576	54.3611	49.7917	58.2	47.3571	44.1875	47.6	42.8667		576	0.293087	0.276851	0.319517	0.271766	0.305505	0.355224	0.370926			576	95.3222	96.3083	103.85	100.1	97.8875	100.04	96.1667			576	4.58957	3.3899	2.50537	2.79087	3.07979	5.6646	3.30098		576	0.0247446	0.0188485	0.0137544	0.0160158	0.0212932	0.0422731	0.0285634
512	61.6056	56.3417	64.5	54.1286	49.7375	54.64	49.1667		512	0.332145	0.31327	0.354104	0.310625	0.343877	0.407761	0.42544			512	102.567	102.858	110.15	106.871	103.438	107.08	102.467			512	4.79488	3.83566	2.64516	3.51421	3.29194	5.68664	3.92985		512	0.0258515	0.021327	0.0145219	0.0201668	0.0227599	0.0424376	0.034005
448	71.0833	65.875	72.4	63.0429	57.5875	63.56	56.75		448	0.383244	0.366277	0.397475	0.361781	0.398151	0.474328	0.491059			448	112.044	112.392	118.05	115.786	111.288	116	110.05			448	4.91056	4.43265	2.56746	4.3197	3.6922	5.27697	4.65473		448	0.0264752	0.0246464	0.0140953	0.0247892	0.0255273	0.0393804	0.0402775
384	83.5889	79.1	83.1	74.8429	67.65	74.2	66.2		384	0.450668	0.439811	0.456217	0.429497	0.467721	0.553731	0.57283			384	124.55	125.617	128.75	127.586	121.35	126.64	119.5			384	4.90933	4.91406	2.46209	4.83231	4.1451	4.45471	5.26091		384	0.0264685	0.0273231	0.0135168	0.0277309	0.0286586	0.0332441	0.0455228
320	100.333	95.975	98.1	90.0429	80.55	86.12	76.7333		320	0.540945	0.533639	0.538567	0.516724	0.55691	0.642687	0.663975			320	141.294	142.492	143.75	142.786	134.25	138.56	130.033			320	4.74789	5.16896	2.33813	4.93238	4.49458	3.61924	5.63706		320	0.0255982	0.0287404	0.0128363	0.0283052	0.0310748	0.0270092	0.0487776
256	121.011	116.092	116.7	108.421	95.7375	98.84	87.9		256	0.652429	0.645492	0.640681	0.622192	0.661913	0.737612	0.7606			256	161.972	162.608	162.35	161.164	149.438	151.28	141.2			256	4.40058	5.14712	2.35942	4.3939	4.6426	3.21128	5.69327		256	0.0237257	0.028619	0.0129532	0.0252151	0.0320982	0.0239648	0.049264
192	143.817	138.033	138.35	128.786	111.938	111.44	98.7333		192	0.775385	0.767491	0.759539	0.739056	0.773918	0.831642	0.854341			192	184.778	184.55	184	181.529	165.637	163.88	152.033			192	3.7945	4.66296	2.3622	3.35083	4.67747	3.47913	5.61098		192	0.020458	0.0259269	0.0129684	0.0192292	0.0323393	0.0259636	0.0485519
128	165.2	158.733	159.65	148.914	127.612	122.84	107.783		128	0.890673	0.882587	0.876475	0.854566	0.882292	0.916716	0.932651			128	206.161	205.25	205.3	201.657	181.312	175.28	161.083			128	2.93304	3.87684	2.3796	2.05534	4.85166	4.24324	5.43887		128	0.0158134	0.0215559	0.013064	0.0117949	0.0335436	0.031666	0.0470626
64	180.722	174.233	175.85	165.579	139.55	131.12	113.883		64	0.974361	0.96877	0.965413	0.950197	0.964826	0.978507	0.985434			64	221.683	220.75	221.5	218.321	193.25	183.56	167.183			64	1.93039	2.79859	1.95512	1.16898	4.957	4.89944	5.40845		64	0.0104077	0.0155607	0.0107336	0.00670837	0.0342719	0.036563	0.0467994
0	185.478	179.85	182.15	174.257	144.637	134	115.567		0	1	1	1	1	1	1	1			0	226.439	226.367	227.8	227	198.337	186.44	168.867			0	1.06103	2.08402	1.12472	1.54325	4.79234	5.2692	5.4178		0	0.00572053	0.0115876	0.0061747	0.00885619	0.0331335	0.0393224	0.0468803
-64	177.167	172.858	175.75	171.786	140.5	129.4	111.883		-64	0.955191	0.961125	0.964864	0.985817	0.971394	0.965672	0.968128			-64	218.128	219.375	221.4	224.529	194.2	181.84	165.183			-64	1.85001	2.56634	1.38022	2.15281	4.33161	5.38632	5.63493		-64	0.0099743	0.0142693	0.00757737	0.0123542	0.029948	0.0401964	0.0487591
-128	156.4	153.167	156.25	157	127.088	117.32	102.383		-128	0.843228	0.851636	0.857809	0.900967	0.878662	0.875522	0.885924			-128	197.361	199.683	201.9	209.743	180.787	169.76	155.683			-128	3.45546	3.9311	3.22296	2.61665	4.0509	5.33079	5.74478		-128	0.0186301	0.0218577	0.017694	0.0150161	0.0280073	0.039782	0.0497096
-192	126.9	124.525	127.7	132.114	106.263	98.72	88.0833		-192	0.684179	0.692383	0.701071	0.758157	0.734682	0.736716	0.762186			-192	167.861	171.042	173.35	184.857	159.963	151.16	141.383			-192	4.8092	5.16035	4.94943	3.16504	4.30134	5.20012	5.77737		-192	0.0259287	0.0286925	0.0271723	0.0181631	0.0297388	0.0388069	0.0499917
-256	93.8944	92.1333	95.45	101.957	81.6	76.44	70.75		-256	0.50623	0.512279	0.524019	0.585096	0.564169	0.570448	0.612201			-256	134.856	138.65	141.1	154.7	135.3	128.88	124.05			-256	5.47619	5.83884	5.89809	3.68178	4.69884	5.08979	5.8298		-256	0.0295248	0.0324651	0.0323804	0.0211284	0.032487	0.0379835	0.0504453
-320	63.2	61.9667	65.05	72.1643	57.0625	53.96	53		-320	0.340742	0.344546	0.357123	0.414125	0.394521	0.402687	0.45861			-320	104.161	108.483	110.7	124.907	110.763	106.4	106.3			-320	5.23814	5.57128	6.03759	3.88667	4.69188	4.93056	6.06351		-320	0.0282413	0.0309773	0.0331463	0.0223042	0.0324389	0.0367952	0.0524676
-384	38.3556	37.6333	40.65	46.8	36.3875	34.24	37.3833		-384	0.206793	0.209248	0.223168	0.268569	0.251577	0.255522	0.323479			-384	79.3167	84.15	86.3	99.5429	90.0875	86.68	90.6833			-384	4.37456	4.79037	5.40578	3.57605	4.156	4.31652	6.39429		-384	0.0235854	0.0266354	0.0296776	0.0205217	0.0287339	0.0322128	0.0553299
-448	20.9167	20.6583	23.75	27.7929	20.6125	18.8	24.8333		-448	0.112772	0.114864	0.130387	0.159493	0.142511	0.140299	0.214883			-448	61.8778	67.175	69.4	80.5357	74.3125	71.24	78.1333			-448	3.20231	3.68744	4.62547	2.89039	3.2701	3.50469	6.60297		-448	0.0172652	0.0205028	0.0253938	0.0165869	0.022609	0.0261544	0.0571356
-512	10.2833	9.64167	13.55	15.0214	10.5	8.28	15.6833		-512	0.0554424	0.0536095	0.0743892	0.0862027	0.0725953	0.061791	0.135708			-512	51.2444	56.1583	59.2	67.7643	64.2	60.72	68.9833			-512	2.14626	2.6278	4.05524	2.13237	2.50655	2.67588	6.48247		-512	0.0115715	0.0146111	0.0222632	0.0122369	0.0173299	0.0199692	0.0560929
-576	4.65556	3.725	8.1	7.03571	4.6125	2.44	9.53333		-576	0.0251003	0.0207117	0.0444688	0.0403755	0.0318901	0.018209	0.0824921			-576	45.6167	50.2417	53.75	59.7786	58.3125	54.88	62.8333			-576	1.3362	1.81086	3.64443	1.48303	2.27276	1.95845	5.78128		-576	0.0072041	0.0100687	0.0200079	0.00851057	0.0157135	0.0146153	0.0500255
-640	2.42778	1.08333	5.7	2.52143	1.4875	0	5.46667		-640	0.0130893	0.00602354	0.0312929	0.0144696	0.0102843	0	0.0473031			-640	43.3889	47.6	51.35	55.2643	55.1875	52.44	58.7667			-640	0.807136	1.32497	3.58774	1.15629	2.40861	1.41353	4.76268		-640	0.00435166	0.0073671	0.0196966	0.00663555	0.0166527	0.0105488	0.0412116
-704	1.91111	0.0416667	4.7	0.35	0	-0.52	2.93333		-704	0.0103037	0.000231675	0.0258029	0.00200853	0	-0.0038806	0.0253822			-704	42.8722	46.5583	50.35	53.0929	53.7	51.92	56.2333			-704	0.635625	1.20361	3.64169	1.04815	2.59717	0.940808	3.5432		-704	0.00342696	0.00669228	0.0199928	0.00601495	0.0179564	0.00702096	0.0306594
-768	1.81667	-0.075	4	-0.7	-0.9625	0.24	1.21667		-768	0.00979452	-0.000417014	0.0219599	-0.00401705	-0.00665457	0.00179104	0.0105278			-768	42.7778	46.4417	49.65	52.0429	52.7375	52.68	54.5167			-768	0.755029	1.61031	3.60997	1.04351	2.65441	0.805183	2.54279		-768	0.00407072	0.00895365	0.0198187	0.00598836	0.0183522	0.00600883	0.0220028
-832	1.9	0.125	3.1	-1.17857	-1.575	1.28	0.283333		-832	0.0102438	0.000695024	0.0170189	-0.0067634	-0.0108893	0.00955224	0.00245169			-832	42.8611	46.6417	48.75	51.5643	52.125	53.72	53.5833			-832	0.926689	2.07399	3.22674	1.15019	2.58504	0.902618	2.07825		-832	0.00499622	0.0115318	0.0177148	0.00660052	0.0178725	0.00673596	0.0179831
-896	1.76111	0.0833333	2.15	-1.16429	-2.2	2.08	-0.883333		-896	0.009495	0.000463349	0.0118035	-0.00668142	-0.0152104	0.0155224	-0.0076435			-896	42.7222	46.6	47.8	51.5786	51.5	54.52	52.4167			-896	1.04843	2.52763	2.90775	1.32441	2.47544	1.03784	2.24702		-896	0.00565259	0.0140541	0.0159635	0.00760033	0.0171148	0.0077451	0.0194435
-960	1.23889	0	1.25	-0.957143	-2.65	2.48	-1.86667		-960	0.00667945	0	0.00686248	-0.0054927	-0.0183217	0.0185075	-0.0161523			-960	42.2	46.5167	46.9	51.7857	51.05	54.92	51.4333			-960	1.23148	2.76289	2.47032	1.5574	2.23774	1.08606	2.51988		-960	0.0066395	0.0153622	0.013562	0.00893734	0.0154714	0.0081049	0.0218046
-1024	0.761111	-0.45	0.45	-0.95	-2.8375	2.8	-2.81667		-1024	0.00410352	-0.00250209	0.00247049	-0.00545171	-0.019618	0.0208955	-0.0243727			-1024	41.7222	46.0667	46.1	51.7929	50.8625	55.24	50.4833			-1024	1.36434	2.93851	2.23439	1.74193	2.07341	1.2334	2.63338		-1024	0.00735582	0.0163386	0.0122668	0.00999633	0.0143352	0.00920449	0.0227867
-1088	0.0277778	-0.95	0	-0.728571	-2.6	2.36	-3.36667		-1088	0.000149763	-0.00528218	0	-0.00418101	-0.017976	0.0176119	-0.0291318			-1088	40.9889	45.5667	45.65	52.0143	51.1	54.8	49.9333			-1088	1.44414	2.93198	1.92273	1.8786	1.98801	1.32665	2.58829		-1088	0.00778606	0.0163023	0.0105557	0.0107806	0.0137448	0.00990037	0.0223965
-1152	-0.516667	-1.19167	-0.3	-0.742857	-1.95	1.6	-3.66667		-1152	-0.0027856	-0.00662589	-0.00164699	-0.00426299	-0.013482	0.0119403	-0.0317277			-1152	40.4444	45.325	45.35	52	51.75	54.04	49.6333			-1152	1.40336	2.85486	1.65284	1.90938	2.08716	1.37101	2.43466		-1152	0.00756617	0.0158736	0.00907405	0.0109572	0.0144303	0.0102314	0.0210672
-1216	-0.883333	-1.56667	-0.5	-0.728571	-1.125	0.72	-3.6		-1216	-0.00476248	-0.00871096	-0.00274499	-0.00418101	-0.00777807	0.00537313	-0.0311509			-1216	40.0778	44.95	45.15	52.0143	52.575	53.16	49.7			-1216	1.40693	2.94125	1.4394	1.94248	2.23059	1.45481	2.25623		-1216	0.00758544	0.0163539	0.00790228	0.0111472	0.015422	0.0108568	0.0195232
-1280	-0.911111	-1.80833	-0.6	-0.592857	-0.1625	-0.12	-3.4		-1280	-0.00491224	-0.0100547	-0.00329399	-0.0034022	-0.0011235	-0.000895522	-0.0294202			-1280	40.05	44.7083	45.05	52.15	53.5375	52.32	49.9			-1280	1.34307	3.0909	1.23364	2.0041	2.47329	1.61354	2.11542		-1280	0.00724112	0.017186	0.00677268	0.0115008	0.0170999	0.0120414	0.0183048
-1344	-0.811111	-1.55833	-0.75	-0.335714	0.625	-0.68	-2.76667		-1344	-0.00437309	-0.00866463	-0.00411749	-0.00192655	0.00432115	-0.00507463	-0.02394			-1344	40.15	44.9583	44.9	52.4071	54.325	51.76	50.5333			-1344	1.37401	3.51541	1.12583	1.99367	2.62731	1.94599	2.05625		-1344	0.00740795	0.0195463	0.0061808	0.011441	0.0181648	0.0145223	0.0177927
-1408	-0.544444	-1.31667	-0.95	-0.0714286	1.275	-0.72	-2.16667		-1408	-0.00293536	-0.00732092	-0.00521548	-0.000409903	0.00881514	-0.00537313	-0.0187482			-1408	40.4167	45.2	44.7	52.6714	54.975	51.72	51.1333			-1408	1.30294	3.89501	1.2114	1.96819	2.77904	2.15154	1.95259		-1408	0.00702478	0.021657	0.00665059	0.0112947	0.0192138	0.0160563	0.0168958
-1472	-0.261111	-0.966667	-1.05	0.3	1.6875	-0.68	-1.46667		-1472	-0.00140778	-0.00537485	-0.00576448	0.00172159	0.0116671	-0.00507463	-0.0126911			-1472	40.7	45.55	44.6	53.0429	55.3875	51.76	51.8333			-1472	1.22656	4.17491	1.29035	1.93315	2.85145	2.53576	1.8982		-1472	0.00661296	0.0232133	0.00708399	0.0110937	0.0197145	0.0189236	0.0164251
-1536	-0.244444	-0.408333	-1.35	0.614286	2.05	-0.4	-0.7		-1536	-0.00131792	-0.00227041	-0.00741147	0.00352517	0.0141734	-0.00298507	-0.00605711			-1536	40.7167	46.1083	44.3	53.3571	55.75	52.04	52.6			-1536	1.1047	4.21858	1.32382	1.80134	2.96226	2.90346	1.83303		-1536	0.00595599	0.0234561	0.00726775	0.0103373	0.0204806	0.0216676	0.0158612
-1600	-0.316667	-0.05	-1.45	0.8	2.225	-0.16	0		-1600	-0.0017073	-0.000278009	-0.00796047	0.00459092	0.0153833	-0.00119403	0			-1600	40.6444	46.4667	44.2	53.5429	55.925	52.28	53.3			-1600	0.967128	4.14988	1.06066	1.68618	3.18712	3.24449	1.71383		-1600	0.00521425	0.0230741	0.005823	0.0096764	0.0220352	0.0242126	0.0148298
-1664	-0.405556	0.191667	-1.6	1.06429	2.05	0.44	0.583333		-1664	-0.00218655	0.0010657	-0.00878397	0.00610756	0.0141734	0.00328358	0.00504759			-1664	40.5556	46.7083	44.05	53.8071	55.75	52.88	53.8833			-1664	0.795995	3.86405	0.889874	1.65691	3.35093	3.46715	1.70692		-1664	0.00429159	0.0214849	0.00488539	0.00950842	0.0231678	0.0258742	0.01477
-1728	-0.466667	0.55	-0.9	1.02143	1.75	0.56	1.18333		-1728	-0.00251602	0.0030581	-0.00494098	0.00586162	0.0120992	0.0041791	0.0102394			-1728	40.4944	47.0667	44.75	53.7643	55.45	53	54.4833			-1728	0.734698	3.45404	0.653357	1.59894	3.49544	3.51272	1.78051		-1728	0.00396111	0.0192051	0.00358692	0.00917574	0.0241669	0.0262143	0.0154068
-1792	-0.222222	0.958333	-0.25	0.792857	1.4125	0.44	1.58333		-1792	-0.00119811	0.00532851	-0.0013725	0.00454993	0.00976579	0.00328358	0.0137006			-1792	40.7389	47.475	45.4	53.5357	55.1125	52.88	54.8833			-1792	0.874529	3.08171	0.574456	1.54737	3.43404	3.18928	1.88155		-1792	0.00471501	0.0171349	0.00315375	0.00887982	0.0237424	0.0238006	0.0162811
-1856	0	1.33333	0.75	0.6	0.925	-0.12	1.95		-1856	0	0.00741359	0.00411749	0.00344319	0.0063953	-0.000895522	0.0168734			-1856	40.9611	47.85	46.4	53.3429	54.625	52.32	55.25			-1856	1.1066	2.8649	0.509902	1.53674	3.13831	2.68781	2.02371		-1856	0.00596619	0.0159294	0.00279935	0.00881881	0.0216978	0.0200583	0.0175112
-1920	0.233333	1.43333	1.75	0.407143	0.375	-1.08	2.08333		-1920	0.00125801	0.0079696	0.00960747	0.00233645	0.00259269	-0.0080597	0.0180271			-1920	41.1944	47.95	47.4	53.15	54.075	51.36	55.3833			-1920	1.23954	2.72088	0.857321	1.7108	2.62028	2.32028	2.10771		-1920	0.00668293	0.0151286	0.00470668	0.00981768	0.0181162	0.0173155	0.0182381
-1984	0.327778	1.58333	2.45	0.1	-0.1875	-2.4	2.11667		-1984	0.00176721	0.00880363	0.0134505	0.000573865	-0.00129634	-0.0179104	0.0183155			-1984	41.2889	48.1	48.1	52.8429	53.5125	50.04	55.4167			-1984	1.18316	2.70421	1.29325	1.95102	2.01389	2.29322	2.06968		-1984	0.00637897	0.0150359	0.00709993	0.0111962	0.0139237	0.0171136	0.0179089
-2048	0.427778	1.63333	3.05	0	-0.95	-3.64	1.7		-2048	0.00230636	0.00908164	0.0167444	0	-0.00656814	-0.0271642	0.0147101			-2048	41.3889	48.15	48.7	52.7429	52.75	48.8	55			-2048	1.06231	2.70552	1.82003	2.15509	1.51822	2.66713	1.88031		-2048	0.00572743	0.0150432	0.00999192	0.0123673	0.0104967	0.019904	0.0162703
-2112	0.444444	1.43333	3.5	-0.0214286	-1.65	-4.44	1.18333		-2112	0.00239621	0.0079696	0.0192149	-0.000122971	-0.0114078	-0.0331343	0.0102394			-2112	41.4056	47.95	49.15	52.7214	52.05	48	54.4833			-2112	0.909499	2.69606	2.23425	2.0787	1.37341	2.88943	1.65032		-2112	0.00490355	0.0149906	0.012266	0.0119289	0.00949552	0.0215629	0.0142803
-2176	0.377778	1	4.2	0.0928571	-2.1875	-4.84	0.45		-2176	0.00203678	0.00556019	0.0230579	0.000532874	-0.015124	-0.0361194	0.00389386			-2176	41.3389	47.5167	49.85	52.8357	51.5125	47.6	53.75			-2176	0.728171	2.54868	2.45395	1.8789	1.54165	2.91753	1.59822		-2176	0.00392592	0.0141712	0.0134721	0.0107824	0.0106587	0.0217726	0.0138294
-2240	0.366667	0.583333	4.75	0.178571	-2.3375	-4.64	-0.0833333		-2240	0.00197688	0.00324344	0.0260774	0.00102476	-0.0161611	-0.0346269	-0.000721085			-2240	41.3278	47.1	50.4	52.9214	51.3625	47.8	53.2167			-2240	0.619095	2.37802	2.38747	1.88252	1.74122	2.64666	1.77364		-2240	0.00333784	0.0132223	0.0131071	0.0108031	0.0120385	0.0197512	0.0153473
-2304	0.461111	0.175	5.4	0.328571	-2.1	-3.96	-0.3		-2304	0.00248607	0.000973033	0.0296459	0.00188556	-0.0145191	-0.0295522	-0.0025959			-2304	41.4222	46.6917	51.05	53.0714	51.6	48.48	53			-2304	0.500069	2.11707	2.16953	2.08637	2.00102	2.29406	1.94765		-2304	0.00269611	0.0117713	0.0119107	0.0119729	0.0138347	0.0171199	0.016853
-2368	0.566667	-0.075	5.6	0.228571	-1.775	-3.04	-0.35		-2368	0.00305517	-0.000417014	0.0307439	0.00131169	-0.0122721	-0.0226866	-0.00302855			-2368	41.5278	46.4417	51.25	52.9714	51.925	49.4	52.95			-2368	0.477203	1.95939	1.83354	2.33454	2.08017	1.84174	1.98603		-2368	0.00257283	0.0108946	0.0100661	0.0133971	0.014382	0.0137443	0.0171851
-2432	0.616667	-0.191667	5.9	0.25	-1.4875	-1.64	0.15		-2432	0.00332475	-0.0010657	0.0323909	0.00143466	-0.0102843	-0.0122388	0.00129795			-2432	41.5778	46.325	51.55	52.9929	52.2125	50.8	53.45			-2432	0.5715	1.78223	1.56105	2.50038	2.13903	1.75271	1.90434		-2432	0.00308123	0.00990955	0.00857013	0.0143488	0.0147889	0.0130799	0.0164783
-2496	0.6	0.0166667	5.85	-0.0285714	-1.55	-0.16	0.583333		-2496	0.00323489	9.26698e-05	0.0321164	-0.000163961	-0.0107164	-0.00119403	0.00504759			-2496	41.5611	46.5333	51.5	52.7143	52.15	52.28	53.8833			-2496	0.651199	1.74526	1.3048	2.47109	2.11232	2.01483	1.73308		-2496	0.00351093	0.00970397	0.00716332	0.0141807	0.0146042	0.015036	0.0149964

## Sheet: Fig 1 Fig Sup 3F
									absolute Difference between Mal3 and normalized background subtracted								Sum of absolute difference
Position	.125x normalized back subtract average	.25x normalized back subtract average	.5x normalized back subtract average	1x normalized back subtract average	2x normalized back subtract average	4x normalized back subtract average	8x normalized back subtract average	Mal3 from Beiling et al. 2007	.125x and Beiling absolute difference	.25x and Beiling absolute difference	.5x and Beiling absolute difference	1x and Beiling absolute difference	2x and Beiling absolute difference	4x and Beiling absolute difference	8x and Beiling absolute difference			0.125X	.25X	.5X	1X	2X	4X	8X
2048	0.0681423	0.105875	0.0719187	0.0544761	0.0577305	0.0928358	0.0289876	0.102589	0.034447	0.0032859	0.0306706	0.0481132	0.0448588	0.00975354	0.0736018			0.589809	0.560534	0.628131	0.748008	0.724781	1.45384	1.97674
1856	0.0862937	0.115652	0.0771342	0.0959584	0.103189	0.12209	0.0588405	0.102682	0.0163882	0.0129701	0.0255476	0.00672352	0.000507132	0.0194077	0.0438414
1728	0.0980351	0.129691	0.0850947	0.123791	0.127128	0.127761	0.0853764	0.105966	0.00793089	0.0237254	0.0208713	0.0178248	0.0211622	0.0217952	0.0205896
1536	0.108908	0.146696	0.0968982	0.154165	0.139746	0.13791	0.141765	0.0997169	0.00919101	0.0469794	0.00281876	0.0544477	0.040029	0.0381935	0.0420483
1408	0.115707	0.153091	0.110898	0.16142	0.141734	0.168358	0.178829	0.131596	0.0158888	0.0214945	0.0206984	0.0298239	0.0101377	0.0367622	0.047233
1216	0.134338	0.159438	0.14274	0.174209	0.149685	0.218507	0.219354	0.147586	0.0132487	0.011852	0.0048469	0.0266225	0.00209815	0.0709211	0.0717675			GTP Edge off	sum of absolute error
1088	0.153058	0.164489	0.165797	0.187408	0.15945	0.239403	0.240698	0.160394	0.0073363	0.00409446	0.00540296	0.0270133	0.000944114	0.0790085	0.0803035			0.357143	0.589809
896	0.18364	0.193495	0.200933	0.196918	0.19013	0.252239	0.262186	0.163683	0.0199566	0.0298114	0.0372501	0.0332343	0.0264473	0.0885556	0.0985031			0.714286	0.560534
704	0.235368	0.235428	0.264892	0.223069	0.250281	0.288657	0.299539	0.201913	0.033455	0.0335146	0.0629785	0.0211562	0.0483678	0.0867436	0.0976254			1.42857	0.628131
512	0.332145	0.31327	0.354104	0.310625	0.343877	0.407761	0.42544	0.306917	0.0252282	0.00635332	0.0471868	0.00370769	0.0369599	0.100844	0.118523			2.85714	0.748008
448	0.383244	0.366277	0.397475	0.361781	0.398151	0.474328	0.491059	0.364176	0.0190682	0.00210117	0.0332983	0.00239567	0.0339743	0.110152	0.126882			5.71429	0.724781
384	0.450668	0.439811	0.456217	0.429497	0.467721	0.553731	0.57283	0.440493	0.0101752	0.000681757	0.0157247	0.0109961	0.0272283	0.113239	0.132337			11.4286	1.45384
320	0.540945	0.533639	0.538567	0.516724	0.55691	0.642687	0.663975	0.526328	0.0146169	0.00731069	0.0122387	0.0096044	0.0305811	0.116358	0.137646			22.8571	1.97674
256	0.652429	0.645492	0.640681	0.622192	0.661913	0.737612	0.7606	0.612146	0.0402835	0.0333459	0.0285351	0.0100465	0.0497677	0.125466	0.148454
192	0.775385	0.767491	0.759539	0.739056	0.773918	0.831642	0.854341	0.691631	0.0837543	0.0758608	0.0679083	0.047425	0.082287	0.140011	0.16271
128	0.890673	0.882587	0.876475	0.854566	0.882292	0.916716	0.932651	0.898243	0.00757049	0.0156559	0.0217678	0.0436769	0.0159513	0.0184732	0.0344075
64	0.974361	0.96877	0.965413	0.950197	0.964826	0.978507	0.985434	0.965008	0.00935255	0.00376232	0.000405165	0.0148112	0.000182098	0.0134995	0.0204261
0	1	1	1	1	1	1	1	1	0	0	0	0	0	0	0
-64	0.955191	0.961125	0.964864	0.985817	0.971394	0.965672	0.968128	0.955549	0.000357973	0.00557624	0.00931535	0.0302686	0.0158452	0.0101229	0.0125793
-128	0.843228	0.851636	0.857809	0.900967	0.878662	0.875522	0.885924	0.863436	0.0202085	0.0118006	0.00562671	0.0375312	0.015226	0.0120862	0.0224882
-192	0.684179	0.692383	0.701071	0.758157	0.734682	0.736716	0.762186	0.761781	0.0776022	0.0693987	0.0607106	0.00362412	0.0270997	0.0250648	0.000405134
-256	0.50623	0.512279	0.524019	0.585096	0.564169	0.570448	0.612201	0.482201	0.0240291	0.0300777	0.0418177	0.102895	0.081968	0.0882468	0.13
-320	0.340742	0.344546	0.357123	0.414125	0.394521	0.402687	0.45861	0.329702	0.0110393	0.0148441	0.0274209	0.084423	0.0648185	0.0729843	0.128907
-384	0.206793	0.209248	0.223168	0.268569	0.251577	0.255522	0.323479	0.237576	0.0307826	0.0283274	0.0144081	0.0309928	0.0140014	0.0179465	0.0859027
-448	0.112772	0.114864	0.130387	0.159493	0.142511	0.140299	0.214883	0.148646	0.0358738	0.0337814	0.0182586	0.0108477	0.0061342	0.00834714	0.0662375
-512	0.0554424	0.0536095	0.0743892	0.0862027	0.0725953	0.061791	0.135708	0.0660802	0.0106377	0.0124707	0.00830909	0.0201225	0.00651513	0.00428911	0.069628
-704	0.0103037	0.000231675	0.0258029	0.00200853	0	-0.0038806	0.0253822	0.0216891	0.0113853	0.0214574	0.00411386	0.0196805	0.0216891	0.0255697	0.00369312

## Sheet: Fig 1 Fig Sup 3 G,H
Fig 1 Sup Fig 3 G	Background subtracted								Fig 1 Sup Fig 3 H	normalized background subtracted									averages										std error									normalized std error
Position	.125x back subtract average	.25x back subtract average	.5x back subtract average	1x back subtract average	2x back subtract average	4x back subtract average	8x back subtract average		position	.125x normalized back subtract average	.25x normalized back subtract average	.5x normalized back subtract average	1x normalized back subtract average	2x normalized back subtract average	4x normalized back subtract average	8x normalized back subtract average			position	.125x average	.25x average	.5x average	1x average	2x average	4x average	8x average			Position	.125x std error	.25x std error	.5x std error	1x std error	2x std error	4x std error	8x std error	0	position	.125x normalized standard error	.25x normalized standard error	.5x normalized standard error	1x normalized standard error	2x normalized standard error	4x normalized standard error	8x normalized standard error
2496	13.96	-0.05625	9.32232	8.88	8.5	12.64	-0.314286		2496	0.0733964	-0.000308695	0.0523138	0.0498205	0.055759	0.100733	-0.00475573			2496	13.96	-0.05625	9.32232	8.88	8.5	12.64	-0.314286			2496	2.73817	2.39858	2.6892	3.61331	2.29788	3.6126	3.65069		2496	0.0143963	0.0131632	0.0150909	0.0202722	0.0150738	0.0287902	0.0552417
2432	14.28	0.175	8.90804	10.12	9.70833	12.2	0.3		2432	0.0750789	0.000960384	0.049989	0.0567774	0.0636856	0.0972266	0.00453956			2432	14.28	0.175	8.90804	10.12	9.70833	12.2	0.3			2432	2.72447	2.51447	2.97601	3.90011	3.06743	3.83541	3.57141		2432	0.0143242	0.0137992	0.0167004	0.0218812	0.020122	0.0305659	0.0540421
2368	14.52	0.2625	8.47946	11.12	11.025	11.75	1.4		2368	0.0763407	0.00144058	0.047584	0.0623878	0.0723227	0.0936404	0.0211846			2368	14.52	0.2625	8.47946	11.12	11.025	11.75	1.4			2368	2.65414	2.30993	3.12951	4.0876	3.71615	4.10507	3.40328		2368	0.0139545	0.0126767	0.0175618	0.0229331	0.0243775	0.0327149	0.051498
2304	14.52	0.375	7.74375	11.6	12.2417	11.53	2.7		2304	0.0763407	0.00205797	0.0434554	0.0650808	0.0803039	0.0918872	0.040856			2304	14.52	0.375	7.74375	11.6	12.2417	11.53	2.7			2304	2.43993	2.02241	2.66586	4.20537	4.27519	4.39808	3.11243		2304	0.0128283	0.0110988	0.0149599	0.0235939	0.0280448	0.0350501	0.0470969
2240	14.44	0.7875	7.475	12.08	13.2833	11.92	4.38571		2240	0.0759201	0.00432173	0.0419473	0.0677738	0.0871372	0.0949952	0.066364			2240	14.44	0.7875	7.475	12.08	13.2833	11.92	4.38571			2240	2.02275	1.77257	2.43625	4.32518	4.44141	4.58121	2.76564		2240	0.0106349	0.00972768	0.0136714	0.0242661	0.0291351	0.0365095	0.0418492
2176	14.96	1.55625	7.60625	12.4	14.3917	12.97	5.51429		2176	0.078654	0.00854056	0.0426838	0.0695691	0.0944077	0.103363	0.0834414			2176	14.96	1.55625	7.60625	12.4	14.3917	12.97	5.51429			2176	1.49773	1.70442	2.20987	4.47807	4.18291	4.60651	2.4788		2176	0.00787451	0.00935372	0.012401	0.0251238	0.0274394	0.0367111	0.0375088
2112	15.4	2.525	7.975	12.96	15.6083	14.94	6.98571		2112	0.0809674	0.013857	0.0447531	0.072711	0.102389	0.119063	0.105707			2112	15.4	2.525	7.975	12.96	15.6083	14.94	6.98571			2112	1.23858	1.76668	2.01457	4.77882	3.67695	4.56715	2.27555		2112	0.00651199	0.00969539	0.0113051	0.0268112	0.0241204	0.0363975	0.0344333
2048	16.24	3.8125	8.78125	13.64	17.0417	17.62	8.4		2048	0.0853838	0.0209227	0.0492775	0.076526	0.111791	0.140421	0.127108			2048	16.24	3.8125	8.78125	13.64	17.0417	17.62	8.4			2048	1.38749	1.94948	1.93939	4.83765	3.06631	4.35122	2.25486		2048	0.00729488	0.0106986	0.0108832	0.0271412	0.0201147	0.0346766	0.0341202
1984	17.28	5.31875	10.0125	14.52	18.5083	20.38	10.1714		1984	0.0908517	0.0291888	0.0561869	0.0814632	0.121413	0.162416	0.153913			1984	17.28	5.31875	10.0125	14.52	18.5083	20.38	10.1714			1984	1.6006	2.0221	1.98027	4.8502	2.51058	3.83024	2.2765		1984	0.00841535	0.0110971	0.0111126	0.0272116	0.0164691	0.0305247	0.0344477
1920	17.96	7.16875	11.4813	15.64	20.1583	22.91	12.2143		1920	0.0944269	0.0393415	0.064429	0.0877469	0.132236	0.182579	0.184825			1920	17.96	7.16875	11.4813	15.64	20.1583	22.91	12.2143			1920	1.64341	2.16809	2.07225	4.35666	2.22248	3.12808	2.36323		1920	0.00864044	0.0118983	0.0116288	0.0244427	0.0145792	0.0249289	0.03576
1856	18.32	9.20625	13.1063	16.88	21.675	24.96	14.4571		1856	0.0963197	0.0505231	0.073548	0.0947038	0.142186	0.198916	0.218764			1856	18.32	9.20625	13.1063	16.88	21.675	24.96	14.4571			1856	1.38726	2.41207	2.20841	3.59689	2.45624	2.51103	2.42609		1856	0.00729367	0.0132372	0.0123929	0.02018	0.0161127	0.0200114	0.0367112
1792	18.44	11.425	14.8875	18.28	23.0333	26.66	16.4286		1792	0.0969506	0.0626994	0.0835438	0.102558	0.151096	0.212464	0.248595			1792	18.44	11.425	14.8875	18.28	23.0333	26.66	16.4286			1792	1.03476	2.75085	2.29344	2.69459	3.05193	2.54521	2.42419		1792	0.00544036	0.0150964	0.01287	0.0151177	0.0200203	0.0202838	0.0366824
1728	18.16	13.575	16.6313	19.68	24.1167	28.02	18.3571		1728	0.0954784	0.0744984	0.0933291	0.110413	0.158203	0.223303	0.277778			1728	18.16	13.575	16.6313	19.68	24.1167	28.02	18.3571			1728	0.681175	3.17291	2.20514	1.87019	3.472	3.23758	2.33539		1728	0.00358136	0.0174126	0.0123745	0.0104925	0.022776	0.0258016	0.0353388
1664	18.12	15.2562	18.7188	21.16	24.7917	28.85	20.0143		1664	0.0952681	0.0837249	0.105043	0.118716	0.162631	0.229917	0.302853			1664	18.12	15.2562	18.7188	21.16	24.7917	28.85	20.0143			1664	0.534864	3.47021	2.0173	1.28449	3.76749	3.96832	2.162		1664	0.00281212	0.0190442	0.0113204	0.00720653	0.0247143	0.0316252	0.032715
1600	18.12	16.4	20.8375	22.32	25.35	29.17	21.0714		1600	0.0952681	0.0900017	0.116933	0.125224	0.166293	0.232467	0.31885			1600	18.12	16.4	20.8375	22.32	25.35	29.17	21.0714			1600	0.615532	3.53404	1.75706	0.916341	3.91221	4.5535	1.98433		1600	0.00323624	0.0193945	0.00986006	0.00514105	0.0256636	0.0362886	0.0300266
1536	18.56	17.1687	23.125	23.32	25.8917	29.07	21.6857		1536	0.0975815	0.0942205	0.12977	0.130835	0.169846	0.23167	0.328145			1536	18.56	17.1687	23.125	23.32	25.8917	29.07	21.6857			1536	0.662118	3.33237	1.76804	1.14598	4.16237	4.7299	1.83375		1536	0.00348117	0.0182877	0.00992164	0.00642945	0.0273047	0.0376944	0.027748
1472	19.08	17.7563	25.3375	24.04	26.3833	28.34	21.8857		1472	0.100315	0.0974447	0.142186	0.134874	0.173072	0.225853	0.331172			1472	19.08	17.7563	25.3375	24.04	26.3833	28.34	21.8857			1472	0.641498	2.95604	2.06604	1.86024	4.32769	4.36436	1.84418		1472	0.00337276	0.0162225	0.0115939	0.0104367	0.0283891	0.0347814	0.0279058
1408	19.96	18.2375	27.3312	24.52	27.0833	27.26	21.9143		1408	0.104942	0.100086	0.153374	0.137567	0.177664	0.217246	0.331604			1408	19.96	18.2375	27.3312	24.52	27.0833	27.26	21.9143			1408	0.697424	2.58297	2.42475	2.51103	4.46312	3.78857	2.12044		1408	0.00366679	0.0141751	0.0136069	0.0140879	0.0292776	0.0301926	0.0320862
1344	21.4	18.8937	28.8438	25.24	27.625	26.16	21.6571		1344	0.112513	0.103687	0.161862	0.141607	0.181217	0.208479	0.327713			1344	21.4	18.8937	28.8438	25.24	27.625	26.16	21.6571			1344	0.650907	2.35531	2.72832	2.92268	4.46726	3.1432	2.55138		1344	0.00342222	0.0129257	0.0153104	0.0163975	0.0293047	0.0250494	0.0386072
1280	23.2	19.825	30.1313	25.92	28.2917	25.46	21.5143		1280	0.121977	0.108798	0.169087	0.145422	0.18559	0.202901	0.325551			1280	23.2	19.825	30.1313	25.92	28.2917	25.46	21.5143			1280	0.645972	2.34037	2.88071	3.11045	4.29642	2.43074	2.98403		1280	0.00339628	0.0128437	0.0161656	0.0174509	0.028184	0.0193715	0.0451539
1216	25.36	21.15	31.1875	27.04	29.0417	25.2	21.5714		1216	0.133333	0.116069	0.175014	0.151706	0.19051	0.200829	0.326416			1216	25.36	21.15	31.1875	27.04	29.0417	25.2	21.5714			1216	0.744043	2.47272	2.91003	3.07267	4.12446	1.89989	3.27433		1216	0.0039119	0.01357	0.0163301	0.0172389	0.027056	0.015141	0.0495467
1152	27.96	22.8875	32.2188	28.6	30.1333	25.42	21.8714		1152	0.147003	0.125605	0.180801	0.160458	0.197671	0.202582	0.330955			1152	27.96	22.8875	32.2188	28.6	30.1333	25.42	21.8714			1152	1.04614	2.58185	2.82913	2.95221	3.95402	1.58453	3.60589		1152	0.00550019	0.014169	0.0158762	0.0165631	0.0259379	0.0126277	0.0545638
1088	31.16	25.0625	33.3125	30.08	31.275	25.96	22.3714		1088	0.163828	0.137541	0.186939	0.168761	0.20516	0.206886	0.338521			1088	31.16	25.0625	33.3125	30.08	31.275	25.96	22.3714			1088	1.34224	2.66093	2.72851	2.87666	3.7887	1.81099	3.82681		1088	0.00705698	0.0146029	0.0153115	0.0161393	0.0248534	0.0144325	0.0579068
1024	34.92	27.6	34.6375	32.2	32.4917	26.6	23.0857		1024	0.183596	0.151466	0.194374	0.180655	0.213142	0.211986	0.34933			1024	34.92	27.6	34.6375	32.2	32.4917	26.6	23.0857			1024	1.5984	2.67349	2.66933	2.83046	3.64399	2.05913	4.07002		1024	0.00840378	0.0146719	0.0149794	0.0158801	0.0239042	0.01641	0.061587
960	39.32	30.5687	36.4688	34.16	34.0083	27.32	23.6286		960	0.20673	0.167759	0.204651	0.191652	0.223091	0.217724	0.357544			960	39.32	30.5687	36.4688	34.16	34.0083	27.32	23.6286			960	2.09792	2.64342	2.64512	2.74144	3.36732	2.24043	4.2602		960	0.0110301	0.0145068	0.0148436	0.0153806	0.0220892	0.0178549	0.0644648
896	44.72	34.1812	38.6813	36.48	35.6917	28.12	23.9286		896	0.235121	0.187584	0.217066	0.204668	0.234133	0.224099	0.362084			896	44.72	34.1812	38.6813	36.48	35.6917	28.12	23.9286			896	2.79909	2.59345	2.72612	2.69162	3.08811	2.28323	4.24316		896	0.0147165	0.0142326	0.0152981	0.0151011	0.0202577	0.0181959	0.064207
832	50.6	38.0875	41.5188	39.28	37.5833	28.95	24.1714		832	0.266036	0.209021	0.23299	0.220377	0.246542	0.230714	0.365759			832	50.6	38.0875	41.5188	39.28	37.5833	28.95	24.1714			832	3.74055	2.62201	2.91558	2.95351	2.78727	2.21206	3.99341		832	0.0196664	0.0143894	0.0163613	0.0165704	0.0182842	0.0176288	0.0604278
768	57.12	42.8375	45.175	42.52	40.0583	29.96	24.1429		768	0.300315	0.235088	0.253507	0.238555	0.262778	0.238763	0.365326			768	57.12	42.8375	45.175	42.52	40.0583	29.96	24.1429			768	4.45292	2.81862	3.32953	3.68495	2.52327	2.17763	3.54762		768	0.0234118	0.0154684	0.0186842	0.0206741	0.0165524	0.0173544	0.0536821
704	64.2	48.5688	49.9062	46.44	42.7083	31.54	24.1857		704	0.337539	0.266541	0.280058	0.260548	0.280162	0.251355	0.365975			704	64.2	48.5688	49.9062	46.44	42.7083	31.54	24.1857			704	4.84393	3.19494	3.84989	4.77004	2.48824	2.23957	3.07985		704	0.0254676	0.0175336	0.0216043	0.0267619	0.0163226	0.017848	0.0466039
640	72.24	55.6937	55.9875	51.32	45.6167	33.5	24.4		640	0.379811	0.305642	0.314184	0.287926	0.29924	0.266975	0.369217			640	72.24	55.6937	55.9875	51.32	45.6167	33.5	24.4			640	4.85027	3.65596	4.40231	5.71689	2.58303	2.48773	2.73963		640	0.0255009	0.0200636	0.0247043	0.0320741	0.0169444	0.0198257	0.0414558
576	81.16	64.575	63.8375	57.12	48.8917	36.29	24.8429		576	0.426709	0.354382	0.358235	0.320467	0.320724	0.289209	0.375919			576	81.16	64.575	63.8375	57.12	48.8917	36.29	24.8429			576	4.62619	3.97872	4.80758	6.49958	2.7945	2.84339	2.53004		576	0.0243227	0.0218349	0.0269786	0.0364653	0.0183316	0.0226601	0.0382842
512	91.36	75.4938	73.4312	64.72	53.2167	39.69	25.4571		512	0.480336	0.414303	0.412072	0.363106	0.349095	0.316305	0.385214			512	91.36	75.4938	73.4312	64.72	53.2167	39.69	25.4571			512	4.27383	4.09667	4.99987	6.68069	2.96401	3.14962	2.31573		512	0.0224702	0.0224822	0.0280576	0.0374815	0.0194436	0.0251005	0.0350414
448	103	88.325	84.8563	74.88	59.4917	44.72	26.9714		448	0.541535	0.48472	0.476185	0.420108	0.390259	0.356391	0.408128			448	103	88.325	84.8563	74.88	59.4917	44.72	26.9714			448	3.94092	3.94289	5.02989	6.44683	3.04253	3.60071	2.19545		448	0.0207199	0.0216382	0.0282261	0.0361694	0.0199587	0.0286955	0.0332212
384	116.36	103.087	98	88.12	68.6417	51.99	29.6857		384	0.611777	0.565735	0.549944	0.49439	0.450282	0.414329	0.4492			384	116.36	103.087	98	88.12	68.6417	51.99	29.6857			384	3.54897	3.54221	4.948	5.93091	3.44465	4.19143	2.0789		384	0.0186592	0.0194393	0.0277665	0.0332748	0.0225965	0.0334032	0.0314576
320	131.56	119.587	112.638	104.72	81.5167	62.24	34.3571		320	0.691693	0.656285	0.632085	0.587522	0.53474	0.496015	0.519888			320	131.56	119.587	112.638	104.72	81.5167	62.24	34.3571			320	3.05418	3.01022	4.78261	5.14537	4.11033	5.07114	2.06817		320	0.0160577	0.0165198	0.0268385	0.0288677	0.0269633	0.0404139	0.0312952
256	147.64	136.988	128.719	123.76	97.7083	76.01	40.9857		256	0.776236	0.751775	0.722327	0.694345	0.640956	0.605754	0.62019			256	147.64	136.988	128.719	123.76	97.7083	76.01	40.9857			256	2.39239	2.41852	4.50895	4.26918	4.79435	6.23757	2.19195		256	0.0125783	0.0132726	0.0253028	0.0239519	0.0314504	0.0497097	0.0331684
192	163.72	154.025	145.25	143.6	116.1	92.24	49.0571		192	0.860778	0.845275	0.815095	0.805655	0.761603	0.735097	0.742326			192	163.72	154.025	145.25	143.6	116.1	92.24	49.0571			192	1.90444	1.819	4.07987	3.34166	5.3762	7.48564	2.46083		192	0.0100128	0.00998248	0.0228949	0.0187481	0.0352673	0.0596561	0.0372369
128	177.6	169.113	161.025	161.72	134.108	108.02	57.1286		128	0.933754	0.928074	0.90362	0.907316	0.879735	0.860854	0.864462			128	177.6	169.113	161.025	161.72	134.108	108.02	57.1286			128	1.63012	1.36602	3.5291	2.46408	5.79461	8.53372	2.74879		128	0.00857054	0.00749659	0.0198042	0.0138245	0.038012	0.0680086	0.0415944
64	187.32	179.331	173.062	174.24	147.65	120.29	63.4571		64	0.984858	0.984154	0.97117	0.977558	0.968567	0.958639	0.960225			64	187.32	179.331	173.062	174.24	147.65	120.29	63.4571			64	1.11628	1.0871	3.06061	1.86539	6.23301	9.20331	3.07036		64	0.00586898	0.00596588	0.0171751	0.0104656	0.0408878	0.0733448	0.0464603
0	190.2	182.219	178.2	178.24	152.442	125.48	66.0857		0	1	1	1	1	1	1	1			0	190.2	182.219	178.2	178.24	152.442	125.48	66.0857			0	0.143108	1.15637	2.84644	1.61136	6.58775	9.44451	3.12974		0	0.00075241	0.00634604	0.0159733	0.00904039	0.0432149	0.075267	0.0473588
-64	184.64	175.625	173.694	171.36	145.758	121.93	64.1143		-64	0.970768	0.963814	0.974712	0.9614	0.956158	0.971709	0.970169			-64	184.64	175.625	173.694	171.36	145.758	121.93	64.1143			-64	1.59459	1.54219	2.99484	1.7885	6.66245	9.39817	2.9359		-64	0.00838376	0.00846341	0.0168061	0.0100342	0.0437049	0.0748977	0.0444257
-128	169.64	158.944	158.738	153.68	128.283	109.69	57.2857		-128	0.891903	0.872269	0.890783	0.862208	0.841524	0.874163	0.86684			-128	169.64	158.944	158.738	153.68	128.283	109.69	57.2857			-128	3.8602	2.21953	3.45651	2.54055	6.59928	9.09145	2.58476		-128	0.0202955	0.0121806	0.0193968	0.0142535	0.0432906	0.0724534	0.0391123
-192	146.68	133.875	135.069	128.12	103.3	91.12	46.8429		-192	0.771188	0.734694	0.757962	0.718806	0.677636	0.726172	0.70882			-192	146.68	133.875	135.069	128.12	103.3	91.12	46.8429			-192	6.14611	3.08573	4.18243	3.58771	6.38846	8.24041	2.30622		-192	0.032314	0.0169342	0.0234704	0.0201285	0.0419076	0.0656711	0.0348974
-256	118.24	104.231	106.444	98.2	76.3583	69.74	34.9857		-256	0.621661	0.572012	0.597327	0.550943	0.500902	0.555786	0.529399			-256	118.24	104.231	106.444	98.2	76.3583	69.74	34.9857			-256	7.9003	3.81472	4.84178	4.356	6.27933	7.0933	2.22412		-256	0.0415368	0.0209348	0.0271705	0.0244389	0.0411917	0.0565293	0.0336551
-320	88.24	74.5062	77.6813	68.72	51.9333	49.2	23.9		-320	0.463933	0.408884	0.435922	0.385548	0.340677	0.392094	0.361652			-320	88.24	74.5062	77.6813	68.72	51.9333	49.2	23.9			-320	8.57916	4.0738	4.96154	4.46763	6.06482	5.61398	2.22515		-320	0.045106	0.0223566	0.0278426	0.0250652	0.0397846	0.0447401	0.0336707
-384	60.64	48.3938	52.5063	43.56	32.8917	31.94	14.7857		-384	0.318822	0.265581	0.294648	0.24439	0.215766	0.254543	0.223735			-384	60.64	48.3938	52.5063	43.56	32.8917	31.94	14.7857			-384	8.18733	3.73771	4.58315	4.14173	5.55091	4.26873	2.21373		-384	0.0430459	0.0205122	0.0257191	0.0232368	0.0364133	0.0340192	0.0334978
-448	38.08	28.325	32.9062	24.6	19.8667	19.31	8.31429		-448	0.20021	0.155445	0.184659	0.138016	0.130323	0.153889	0.125811			-448	38.08	28.325	32.9062	24.6	19.8667	19.31	8.31429			-448	6.75553	2.97215	3.81167	3.45606	4.6857	2.96865	2.22489		-448	0.035518	0.0163109	0.0213898	0.0193899	0.0307377	0.0236583	0.0336668
-512	21.6	14.5625	19.5563	12.16	11.5	11.05	4.48571		-512	0.113565	0.0799177	0.109743	0.0682226	0.0754387	0.0880618	0.0678772			-512	21.6	14.5625	19.5563	12.16	11.5	11.05	4.48571			-512	4.97076	2.22133	2.94156	2.71446	3.94366	2.11272	2.33854		-512	0.0261344	0.0121904	0.0165071	0.0152293	0.02587	0.0168371	0.0353864
-576	11.04	6.34375	11.1938	4.88	6.66667	6.14	2.15714		-576	0.0580442	0.0348139	0.0628157	0.0273788	0.0437326	0.0489321	0.0326416			-576	11.04	6.34375	11.1938	4.88	6.66667	6.14	2.15714			-576	3.11928	1.84236	2.25513	2.19089	3.20142	1.90779	2.35436		-576	0.0164	0.0101107	0.0126551	0.0122918	0.021001	0.015204	0.0356259
-640	5.04	2.05	6.4125	1	4.18333	3.52	0.714286		-640	0.0264984	0.0112502	0.0359848	0.00561041	0.0274422	0.0280523	0.0108085			-640	5.04	2.05	6.4125	1	4.18333	3.52	0.714286			-640	1.88434	2.00639	1.70849	1.82831	2.70021	1.84703	2.35986		-640	0.00990713	0.0110109	0.00958748	0.0102576	0.017713	0.0147197	0.035709
-704	1.92	0.35	3.89375	-1.12	2.61667	2.08	-0.114286		-704	0.0100946	0.00192077	0.0218504	-0.00628366	0.017165	0.0165763	-0.00172936			-704	1.92	0.35	3.89375	-1.12	2.61667	2.08	-0.114286			-704	1.27925	2.40771	1.29577	1.65312	2.34493	2.06967	2.34045		-704	0.00672581	0.0132133	0.00727144	0.00927468	0.0153825	0.016494	0.0354154
-768	0.44	-0.08125	2.46875	-2	1.46667	1.26	-0.457143		-768	0.00231335	-0.000445893	0.0138538	-0.0112208	0.00962117	0.0100414	-0.00691742			-768	0.44	-0.08125	2.46875	-2	1.46667	1.26	-0.457143			-768	1.07421	2.62461	1.09801	1.54361	2.00477	2.34224	2.2365		-768	0.00564777	0.0144036	0.00616165	0.00866027	0.0131511	0.0186662	0.0338424
-832	-0.32	-0.13125	1.66875	-2.36	0.675	0.5	-0.614286		-832	-0.00168244	-0.000720288	0.00936448	-0.0132406	0.00442792	0.0039847	-0.00929529			-832	-0.32	-0.13125	1.66875	-2.36	0.675	0.5	-0.614286			-832	1.06673	2.55927	0.848144	1.35576	1.65992	2.74285	2.1844		-832	0.00560848	0.014045	0.00475951	0.00760636	0.0108889	0.0218588	0.033054
-896	-0.88	0	0.90625	-2.24	0	0	-0.3		-896	-0.00462671	0	0.00508558	-0.0125673	0	0	-0.00453956			-896	-0.88	0	0.90625	-2.24	0	0	-0.3			-896	0.926758	2.25327	0.737702	1.16838	1.38572	3.0141	2.09516		-896	0.00487254	0.0123657	0.00413974	0.00655511	0.00909019	0.0240206	0.0317036
-960	-0.92	0.23125	0.38125	-1.6	-0.35	-0.78	-0.157143		-960	-0.00483701	0.00126908	0.00213945	-0.00897666	-0.00229596	-0.00621613	-0.00237786			-960	-0.92	0.23125	0.38125	-1.6	-0.35	-0.78	-0.157143			-960	0.918433	1.83885	0.705072	1.16152	1.3129	3.02396	2.01876		-960	0.00482878	0.0100915	0.00395663	0.00651659	0.00861247	0.0240991	0.0305476
-1024	-0.88	0.38125	-0.04375	-0.36	-0.591667	-1.33	0		-1024	-0.00462671	0.00209227	-0.000245511	-0.00201975	-0.00388127	-0.0105993	0			-1024	-0.88	0.38125	-0.04375	-0.36	-0.591667	-1.33	0			-1024	0.968958	1.43801	0.875736	1.17221	1.39701	2.92163	2.01066		-1024	0.00509442	0.00789167	0.00491434	0.00657659	0.00916422	0.0232836	0.030425
-1088	-0.48	0.625	-0.45625	0.92	-0.775	-1.93	0.257143		-1088	-0.00252366	0.00342994	-0.00256033	0.00516158	-0.00508391	-0.0153809	0.00389105			-1088	-0.48	0.625	-0.45625	0.92	-0.775	-1.93	0.257143			-1088	1.06343	1.32083	1.11032	1.06643	1.53977	2.61838	2.04545		-1088	0.00559111	0.00724862	0.00623074	0.00598313	0.0101007	0.0208669	0.0309514
-1152	0	0.875	-0.975	2.16	-0.783333	-2.15	0.628571		-1152	0	0.00480192	-0.00547138	0.0121185	-0.00513858	-0.0171342	0.00951146			-1152	0	0.875	-0.975	2.16	-0.783333	-2.15	0.628571			-1152	1.21642	1.33645	1.40401	1.12513	1.61343	2.33555	2.12755		-1152	0.00639548	0.0073343	0.00787882	0.00631245	0.0105839	0.0186129	0.0321938
-1216	0.2	1.2	-1.4375	3.2	-0.608333	-2.03	1.12857		-1216	0.00105152	0.00658549	-0.00806678	0.0179533	-0.0039906	-0.0161779	0.0170774			-1216	0.2	1.2	-1.4375	3.2	-0.608333	-2.03	1.12857			-1216	1.39874	1.43487	1.66299	1.49302	1.65514	2.04507	2.18668		-1216	0.00735406	0.00787446	0.00933217	0.00837648	0.0108576	0.016298	0.0330886
-1280	0.12	1.4875	-1.95	3.64	-0.383333	-1.3	1.62857		-1280	0.000630915	0.00816327	-0.0109428	0.0204219	-0.00251462	-0.0103602	0.0246433			-1280	0.12	1.4875	-1.95	3.64	-0.383333	-1.3	1.62857			-1280	1.41918	1.46454	1.87185	1.822	1.60098	1.80665	2.16143		-1280	0.00746153	0.00803726	0.0105042	0.0102222	0.0105023	0.0143979	0.0327065
-1344	-0.24	1.54375	-2.4125	3.68	0.2	-0.24	1.9		-1344	-0.00126183	0.00847196	-0.0135382	0.0206463	0.00131198	-0.00191266	0.0287505			-1344	-0.24	1.54375	-2.4125	3.68	0.2	-0.24	1.9			-1344	1.44111	1.47672	2.03495	2.19818	1.47468	1.45261	2.0893		-1344	0.00757682	0.00810411	0.0114195	0.0123327	0.00967372	0.0115764	0.0316151
-1408	-0.52	1.225	-2.56875	3.32	0.916667	0.97	2		-1408	-0.00273396	0.00672269	-0.014415	0.0186266	0.00601323	0.00773032	0.0302637			-1408	-0.52	1.225	-2.56875	3.32	0.916667	0.97	2			-1408	1.48766	1.43328	2.01129	2.10857	1.53526	1.12068	1.91883		-1408	0.00782153	0.00786571	0.0112867	0.01183	0.0100712	0.00893113	0.0290355
-1472	-0.88	0.675	-2.29375	2.6	1.45	2.14	1.91429		-1472	-0.00462671	0.00370434	-0.0128718	0.0145871	0.00951184	0.0170545	0.0289667			-1472	-0.88	0.675	-2.29375	2.6	1.45	2.14	1.91429			-1472	1.49602	1.33346	1.94573	1.94204	1.66711	0.738431	1.89972		-1472	0.00786552	0.00731792	0.0109188	0.0108956	0.0109361	0.00588485	0.0287462
-1536	-1.04	-0.14375	-1.61875	1.76	1.79167	2.98	1.47143		-1536	-0.00546793	-0.000788887	-0.00908389	0.00987433	0.0117531	0.0237488	0.0222655			-1536	-1.04	-0.14375	-1.61875	1.76	1.79167	2.98	1.47143			-1536	1.48162	1.1895	1.83102	1.5825	1.91429	0.561712	1.97701		-1536	0.0077898	0.00652785	0.0102751	0.0088785	0.0125575	0.0044765	0.0299159
-1600	-0.68	-1.1625	-0.875	0.6	1.64167	3.21	0.957143		-1600	-0.00357518	-0.00637969	-0.00491021	0.00336625	0.0107691	0.0255818	0.0144834			-1600	-0.68	-1.1625	-0.875	0.6	1.64167	3.21	0.957143			-1600	1.4614	1.08701	1.84538	1.27197	2.11017	0.653667	2.15022		-1600	0.00768347	0.00596543	0.0103557	0.0071363	0.0138425	0.00520933	0.0325368
-1664	-0.44	-2.25625	0	-0.24	1.11667	2.98	0.314286		-1664	-0.00231335	-0.0123821	0	-0.0013465	0.00732521	0.0237488	0.00475573			-1664	-0.44	-2.25625	0	-0.24	1.11667	2.98	0.314286			-1664	1.51156	0.998358	1.98255	1.12939	2.27775	0.85154	2.22196		-1664	0.00794719	0.0054789	0.0111254	0.00633634	0.0149418	0.00678626	0.0336223
-1728	0.24	-2.9875	0.6	-0.76	0.225	2.1	-0.514286		-1728	0.00126183	-0.0163951	0.003367	-0.00426391	0.00147597	0.0167357	-0.0077821			-1728	0.24	-2.9875	0.6	-0.76	0.225	2.1	-0.514286			-1728	1.6026	1.00747	2.15647	1.25015	2.39451	0.944881	2.15012		-1728	0.00842586	0.0055289	0.0121014	0.00701387	0.0157077	0.00753013	0.0325354
-1792	0.84	-3.64375	0.86875	-0.96	-0.825	1.06	-1.27143		-1792	0.0044164	-0.0199966	0.00487514	-0.005386	-0.00541191	0.00844756	-0.0192391			-1792	0.84	-3.64375	0.86875	-0.96	-0.825	1.06	-1.27143			-1792	1.75326	0.988597	2.27877	1.45921	2.54101	1.05739	1.96155		-1792	0.00921798	0.00542533	0.0127877	0.00818674	0.0166687	0.00842679	0.029682
-1856	1.44	-3.9125	0.70625	-0.64	-1.8	-0.01	-1.84286		-1856	0.00757098	-0.0214714	0.00396324	-0.00359066	-0.0118078	-7.9694e-05	-0.0278859			-1856	1.44	-3.9125	0.70625	-0.64	-1.8	-0.01	-1.84286			-1856	1.72659	0.962112	2.35482	1.77503	2.82788	1.17749	1.62524		-1856	0.00907777	0.00527998	0.0132145	0.00995863	0.0185506	0.00938388	0.0245929
-1920	1.96	-4.125	0.35	-0.44	-2.34167	-0.68	-2.1		-1920	0.0103049	-0.0226376	0.00196409	-0.00246858	-0.0153611	-0.00541919	-0.0317769			-1920	1.96	-4.125	0.35	-0.44	-2.34167	-0.68	-2.1			-1920	1.63756	0.896518	2.28094	1.97148	2.99596	1.4312	1.19005		-1920	0.00860967	0.00492001	0.0127999	0.0110608	0.0196532	0.0114058	0.0180076
-1984	2.16	-4.1625	0.025	0	-2.825	-0.73	-2.1		-1984	0.0113565	-0.0228434	0.000140292	0	-0.0185317	-0.00581766	-0.0317769			-1984	2.16	-4.1625	0.025	0	-2.825	-0.73	-2.1			-1984	1.37521	0.806586	2.0841	2.07507	3.01875	1.71088	1.09576		-1984	0.00723033	0.00442647	0.0116953	0.011642	0.0198026	0.0136347	0.016581
-2048	2.28	-4.00625	-0.06875	0.48	-2.94167	-0.13	-1.78571		-2048	0.0119874	-0.0219859	-0.000385802	0.002693	-0.019297	-0.00103602	-0.0270212			-2048	2.28	-4.00625	-0.06875	0.48	-2.94167	-0.13	-1.78571			-2048	1.18335	0.828449	1.72226	1.92083	2.89102	2.05385	1.3599		-2048	0.00622162	0.00454645	0.00966476	0.0107767	0.0189648	0.016368	0.0205778
-2112	1.96	-4.03125	0.3	0.92	-3.025	0.8	-1.3		-2112	0.0103049	-0.0221231	0.0016835	0.00516158	-0.0198437	0.00637552	-0.0196714			-2112	1.96	-4.03125	0.3	0.92	-3.025	0.8	-1.3			-2112	0.924338	1.03614	1.2036	1.76309	2.61599	2.52824	1.78494		-2112	0.00485982	0.00568626	0.00675418	0.00989165	0.0171606	0.0201486	0.0270094
-2176	1.64	-4.075	1.20625	1.12	-2.975	1.48	-0.557143		-2176	0.0086225	-0.0223632	0.00676908	0.00628366	-0.0195157	0.0117947	-0.00843061			-2176	1.64	-4.075	1.20625	1.12	-2.975	1.48	-0.557143			-2176	0.762312	1.36442	0.726417	1.67083	2.28189	2.85102	2.11175		-2176	0.00400795	0.0074878	0.00407641	0.00937406	0.0149689	0.0227209	0.0319547
-2240	1.4	-4.04375	2.2625	0.92	-2.94167	1.95	0.185714		-2240	0.00736067	-0.0221917	0.0126964	0.00516158	-0.019297	0.0155403	0.0028102			-2240	1.4	-4.04375	2.2625	0.92	-2.94167	1.95	0.185714			-2240	0.602395	1.76544	0.615294	1.73749	2.01969	3.06757	2.36707		-2240	0.00316717	0.00968857	0.00345283	0.00974805	0.0132489	0.0244467	0.0358182
-2304	1.28	-4.14375	3.15625	0.56	-3.125	1.86	0.742857		-2304	0.00672976	-0.0227405	0.0177118	0.00314183	-0.0204996	0.0148231	0.0112408			-2304	1.28	-4.14375	3.15625	0.56	-3.125	1.86	0.742857			-2304	0.504698	2.11314	0.909578	1.80275	1.79824	3.05334	2.41785		-2304	0.00265351	0.0115967	0.00510425	0.0101142	0.0117963	0.0243333	0.0365866
-2368	1.32	-4.29375	3.53125	0.28	-3.64167	1.83	0.957143		-2368	0.00694006	-0.0235637	0.0198162	0.00157092	-0.0238889	0.014584	0.0144834			-2368	1.32	-4.29375	3.53125	0.28	-3.64167	1.83	0.957143			-2368	0.464414	2.38373	1.16875	1.89061	1.76067	2.77718	2.38228		-2368	0.00244171	0.0130817	0.00655864	0.0106071	0.0115498	0.0221324	0.0360484
-2432	1.36	-4.4	3.21875	0	-4.26667	1.64	0.857143		-2432	0.00715037	-0.0241468	0.0180626	0	-0.0279888	0.0130698	0.0129702			-2432	1.36	-4.4	3.21875	0	-4.26667	1.64	0.857143			-2432	0.551362	2.54037	1.23015	1.98764	1.86097	2.47961	2.26729		-2432	0.00289885	0.0139413	0.00690322	0.0111515	0.0122077	0.019761	0.0343083
-2496	1.6	-4.6875	2.45	0	-4.83333	1.59	0.514286		-2496	0.0084122	-0.0257246	0.0137486	0	-0.0317061	0.0126713	0.0077821			-2496	1.6	-4.6875	2.45	0	-4.83333	1.59	0.514286			-2496	0.665492	2.58693	1.16603	2.33896	1.94685	2.0294	2.1417		-2496	0.00349891	0.0141968	0.00654339	0.0131225	0.0127711	0.0161731	0.0324079

## Sheet: Fig 1 Fig Sup 3 I
									absolute Difference between Mal3 and normalized background subtracted								Sum of absolute difference
Position	.125x normalized back subtract average	.25x normalized back subtract average	.5x normalized back subtract average	1x normalized back subtract average	2x normalized back subtract average	4x normalized back subtract average	8x normalized back subtract average	Mal3 from Beiling et al. 2007	.125x and Beiling absolute difference	.25x and Beiling absolute difference	.5x and Beiling absolute difference	1x and Beiling absolute difference	2x and Beiling absolute difference	4x and Beiling absolute difference	8x and Beiling absolute difference			0.125X	.25X	.5X	1X	2X	4X	8X
2048	0.0853838	0.0209227	0.0492775	0.076526	0.111791	0.140421	0.127108	0.102589	0.0172056	0.0816667	0.0533119	0.0260633	0.00920203	0.0378314	0.0245183			1.88229	1.45216	1.41856	0.854941	0.851195	1.09364	1.90699
1856	0.0963197	0.0505231	0.073548	0.0947038	0.142186	0.198916	0.218764	0.102682	0.00636221	0.0521588	0.0291339	0.00797811	0.0395037	0.0962343	0.116082
1728	0.0954784	0.0744984	0.0933291	0.110413	0.158203	0.223303	0.277778	0.105966	0.0104875	0.0314676	0.0126369	0.00444693	0.0522366	0.117337	0.171812
1536	0.0975815	0.0942205	0.12977	0.130835	0.169846	0.23167	0.328145	0.0997169	0.00213543	0.00549637	0.030053	0.0311179	0.0701295	0.131953	0.228428
1408	0.104942	0.100086	0.153374	0.137567	0.177664	0.217246	0.331604	0.131596	0.0266538	0.0315102	0.021778	0.00597134	0.0460676	0.0856498	0.200008
1216	0.133333	0.116069	0.175014	0.151706	0.19051	0.200829	0.326416	0.147586	0.0142531	0.0315171	0.0274276	0.00411916	0.0429236	0.0532424	0.17883
1088	0.163828	0.137541	0.186939	0.168761	0.20516	0.206886	0.338521	0.160394	0.00343309	0.0228537	0.0265444	0.00836676	0.044766	0.0464911	0.178127
896	0.235121	0.187584	0.217066	0.204668	0.234133	0.224099	0.362084	0.163683	0.0714377	0.0239004	0.0533833	0.0409847	0.0704501	0.0604163	0.198401
704	0.337539	0.266541	0.280058	0.260548	0.280162	0.251355	0.365975	0.201913	0.135626	0.0646278	0.0781444	0.0586345	0.0782487	0.0494417	0.164062				GTP Lattice off rate	sum of absolute difference
512	0.480336	0.414303	0.412072	0.363106	0.349095	0.316305	0.385214	0.306917	0.173419	0.107386	0.105155	0.0561889	0.0421783	0.00938839	0.078297				0.035714	1.88229
448	0.541535	0.48472	0.476185	0.420108	0.390259	0.356391	0.408128	0.364176	0.177359	0.120543	0.112009	0.0559314	0.0260823	0.00778483	0.0439517				0.071428	1.45216
384	0.611777	0.565735	0.549944	0.49439	0.450282	0.414329	0.4492	0.440493	0.171284	0.125242	0.109451	0.0538969	0.00978882	0.0261637	0.00870746				0.142856	1.41856
320	0.691693	0.656285	0.632085	0.587522	0.53474	0.496015	0.519888	0.526328	0.165365	0.129957	0.105756	0.061194	0.00841162	0.0303131	0.00644086				0.285712	0.854941
256	0.776236	0.751775	0.722327	0.694345	0.640956	0.605754	0.62019	0.612146	0.16409	0.139629	0.110182	0.082199	0.0288099	0.00639178	0.00804454				0.571424	0.851195
192	0.860778	0.845275	0.815095	0.805655	0.761603	0.735097	0.742326	0.691631	0.169148	0.153645	0.123465	0.114025	0.0699722	0.0434666	0.0506954				1.14285	1.09364
128	0.933754	0.928074	0.90362	0.907316	0.879735	0.860854	0.864462	0.898243	0.0355107	0.0298309	0.0053763	0.00907275	0.0185078	0.0373889	0.0337815				2.2857	1.90699
64	0.984858	0.984154	0.97117	0.977558	0.968567	0.958639	0.960225	0.965008	0.0198501	0.0191457	0.00616208	0.0125504	0.00355926	0.00636913	0.00478314
0	1	1	1	1	1	1	1	1	0	0	0	0	0	0	0
-64	0.970768	0.963814	0.974712	0.9614	0.956158	0.971709	0.970169	0.955549	0.0152188	0.00826533	0.0191636	0.00585159	0.000609322	0.0161599	0.0146198
-128	0.891903	0.872269	0.890783	0.862208	0.841524	0.874163	0.86684	0.863436	0.0284671	0.0088327	0.0273466	0.00122795	0.0219121	0.010727	0.0034034
-192	0.771188	0.734694	0.757962	0.718806	0.677636	0.726172	0.70882	0.761781	0.00940703	0.0270873	0.00381963	0.0429751	0.0841449	0.0356097	0.0529615
-256	0.621661	0.572012	0.597327	0.550943	0.500902	0.555786	0.529399	0.482201	0.13946	0.0898107	0.115126	0.0687415	0.018701	0.0735848	0.047198
-320	0.463933	0.408884	0.435922	0.385548	0.340677	0.392094	0.361652	0.329702	0.13423	0.0791813	0.106219	0.0558453	0.0109745	0.0623921	0.0319492
-384	0.318822	0.265581	0.294648	0.24439	0.215766	0.254543	0.223735	0.237576	0.0812464	0.0280047	0.057072	0.00681373	0.0218103	0.0169667	0.0138404
-448	0.20021	0.155445	0.184659	0.138016	0.130323	0.153889	0.125811	0.148646	0.0515647	0.00679939	0.0360134	0.0106295	0.0183226	0.00524342	0.022835
-512	0.113565	0.0799177	0.109743	0.0682226	0.0754387	0.0880618	0.0678772	0.0660802	0.0474845	0.0138375	0.0436631	0.00214247	0.00935854	0.0219817	0.00179706
-704	0.0100946	0.00192077	0.0218504	-0.00628366	0.017165	0.0165763	-0.00172936	0.0216891	0.0115944	0.0197683	0.000161395	0.0279727	0.00452402	0.00511271	0.0234184
