# Supplementary material for: Rapid binding to protofilament edge sites facilitates tip tracking of EB1 at growing microtubule plus-ends
Source: eLife. 2024 Feb 22;13:e91719. doi: 10.7554/eLife.91719 (PMC10883673; doi:10.7554/eLife.91719)
Supplement: Figure 1—source data 1. [file elife-91719-fig1-data1.xlsx]

## Sheet: Fig.1 C Right
Position	EB1 average background subtracted profile	MT average bacakground subtracted profile	EB1 std error	MT std error	Position	Normalize EB1 average profile	Normalized MT average profile			EB1 average	MT average					EB1 individual profiles	Position	growth event 1	growth event 2	growth event 3	growth event 4	growth event 5	growth event 6	growth event 7	growth event 8	growth event 9	growth event 10	growth event 11	growth event 12	growth event 13	growth event 14	growth event 15	growth event 16	growth event 17	growth event 18	growth event 19	growth event 20	growth event 21	growth event 22	growth event 23	growth event 24	growth event 25	growth event 26	growth event 27	growth event 28	growth event 29	growth event 30	growth event 31	growth event 32
2496	6.81684	59.5438	1.1344	5.89514	2496	0.0441752	0.430102			59.1916	149.775						2496	73.8	48.8	54.2	66.4	62.4	39.6	44.6	64.4	73.4	43.8	50.8	52.8	52.2	70.2	54.8	64.8	55	58	59	55.2	45	45.2	51.8	61.2	64.6	41.4	52.2	62.4	77.8	60.6	55	46.6
2432	7.38151	64.4712	1.142	5.75209	2432	0.0478344	0.465693			59.7562	154.702						2432	73	48.6	54.4	68.8	61.6	40.6	44.4	68	74	44.2	52.8	59.4	52.6	72.6	53.8	66.2	55.2	57.2	61.6	53.8	44.4	47.6	54.2	62.2	64.6	40	52.2	62.2	78	64.8	58.6	47.2
2368	8.20235	70.4024	1.15854	5.59393	2368	0.0531536	0.508536			60.5771	160.633						2368	72.4	48.8	55.2	71.4	60.2	41.8	45.6	72	75.2	45	55	67	53.2	74.6	54.4	67.6	56.2	56	65	52.4	44.2	49.2	56.6	63.6	64.6	38.6	51.8	62.4	78.2	69	62	48.2
2304	9.16693	76.8087	1.17451	5.39717	2304	0.0594044	0.554811			61.5417	167.04						2304	72.2	49.8	56	74.8	58.4	44.2	47.6	75.2	76.4	45.4	57.4	74.8	55	76.4	55.8	69.2	58.2	54.2	67.6	51.6	44.2	49.8	58	64.4	63.8	38.2	51	62.2	78.2	72.6	64.8	49.6
2240	10.2129	82.6969	1.16865	5.17439	2240	0.0661826	0.597343			62.5876	172.928						2240	72.8	52	57.4	77.6	57.6	46.6	51.4	77.8	77.6	46.4	60	80.8	57.4	77	58.2	71.4	60.2	52.8	69.6	51.6	45.2	49.6	58.2	65	64.2	39.2	50.6	62.4	78.8	75.8	66.4	52
2176	11.3428	89.4722	1.16382	4.92507	2176	0.0735046	0.646283			63.7175	179.703						2176	74	54.8	58.8	80.4	58.6	49	56.6	79.4	78.2	47.2	62.6	84.8	59.6	77.4	62	73.6	61.8	52.6	70.8	52.6	46.6	49	57.4	65.2	64	41.6	50.6	62.4	79.2	78	66.8	54.4
2112	12.4727	96.266	1.13523	4.64214	2112	0.0808267	0.695356			64.8474	186.497						2112	75.2	59	60	82.2	62.2	51.8	62.4	79.2	78	48.4	66.4	85.8	62	77	66.2	75.6	62.8	53	71.2	54.6	48.4	47.8	55.6	65.2	64	45.8	51.2	62.2	80.2	79.4	66.4	58
2048	13.617	102.874	1.08381	4.31986	2048	0.0882423	0.743089			65.9918	193.105						2048	76.4	63.8	61.4	82.8	67.6	54	68.4	77.8	76.8	50.6	71.4	84.6	63.8	77.4	69.4	76.2	64	55	70.4	57.6	51	48	54.2	66	65	52.2	53.6	62.6	81.2	80.2	65.4	61.4
1984	14.7284	109.095	1.02834	3.96449	1984	0.0954441	0.788023			67.1031	199.326						1984	77.2	69	63	82.2	74	57.6	73.4	76	74.6	53.8	76.6	81.4	65	78.2	72	75.8	64.6	57.4	68.6	61.4	53.8	49.8	52.6	68.4	66.4	59	56.6	62.8	81.4	81.2	65.2	65.4
1920	15.8912	114.847	0.970076	3.55905	1920	0.10298	0.829575			68.266	205.078						1920	76.6	73.4	65	80.6	80.4	60.8	76.6	74	71.6	58.6	82.2	77.8	65.8	79.8	73.6	73.6	66.4	60.6	66.8	66.4	56.8	54.2	52	72.4	69	66.6	61.2	62.2	81.4	82.6	64.6	69.4
1856	17.1016	119.951	0.9229	3.13706	1856	0.110823	0.866436			69.4763	210.181						1856	74.6	76.6	67.4	78.2	85.4	63.2	79	72.8	67.6	63.6	87.2	74.8	67.2	81.8	73.8	72	68.2	64.6	65.2	71	59.6	60.4	53	78	72	72.6	66.8	62.4	80.4	84.2	65.4	72.8
1792	18.4562	124.336	0.887758	2.70237	1792	0.119602	0.898115			70.8309	214.567						1792	71.8	78.4	70.4	76.2	87.8	65.2	81	72.2	64.8	68.4	90.8	72.4	69.4	83.2	73.8	70.4	70.8	68.8	64.2	74.6	61.4	67.8	55.4	83	75.4	77.6	72.2	63.4	78.8	85.6	67.6	76
1728	19.8129	127.955	0.856804	2.29768	1728	0.128393	0.924252			72.1876	218.186						1728	69	79	73.4	74.8	87.2	67	83.2	72.4	62.6	72	92.4	71	71.6	83.2	73.2	69.2	73.8	72.4	63	77.8	63.2	75	58.6	87.2	78	80.4	77.6	65	76.8	86	70.4	78.2
1664	21.1098	130.814	0.81276	1.95174	1664	0.136798	0.944909			73.4845	221.045						1664	67	78.4	76.2	74.6	84.4	67.6	84.8	73.2	61.8	74.4	92.6	70.8	73.8	81.8	73.4	68.8	76.4	76	61.8	79.4	64.6	80.2	62.8	89.2	79.8	81.6	81.6	67.2	74.8	85	73.6	80.4
1600	22.3057	132.967	0.756716	1.68213	1600	0.144547	0.960458			74.6804	223.198						1600	66.4	78	78	74.6	80.4	68.2	86.6	74	62.4	76.2	90.6	71	75	79.2	72.8	69.4	77.8	79.6	60.8	80	66	83.8	66.8	89.6	80.6	81.8	83.8	70	73	82.8	76.4	82
1536	23.2583	134.499	0.712957	1.49536	1536	0.15072	0.971524			75.633	224.73						1536	66.6	77.2	79.4	74.8	77	68.4	87.4	75.8	63.8	77	88.2	71.6	75.6	76.2	72	70.8	78.4	82.8	60	80.8	67.2	84	69.2	89	81	81.2	83.6	72.8	72	80	78.6	82
1472	24.0232	135.612	0.686592	1.36728	1472	0.155677	0.979566			76.3979	225.843						1472	68	76.6	80.4	75	75.2	68.6	87.4	76.8	65.8	77.2	85.6	73	76.4	74.8	70.6	74	78	86.2	59	81.6	68	82	71.2	88.4	81.4	80.4	82	75.4	72	78.2	79.2	82.8
1408	24.5325	136.334	0.680911	1.30047	1408	0.158978	0.984779			76.9072	226.565						1408	69.6	76.2	80.8	75.4	74.6	69	86	77.2	68.2	76.6	83.6	74.4	77.4	73.8	69.4	78	76.6	88.8	58.8	82.4	68.6	78.2	71.8	88.8	81.8	79	79.6	78.4	72	76.6	78.2	82.6
1344	24.9799	136.843	0.699639	1.25965	1344	0.161877	0.988458			77.3546	227.074						1344	71.8	76.2	81.4	75.4	75.4	69	84.2	77.4	70.2	75.4	83	76.8	78.4	74.2	69.2	81.8	74.8	91	58	83	68.8	74.2	72	89.4	82.8	77	77.6	81	72.2	77	76.2	83.2
1280	25.5077	137.138	0.741804	1.24032	1280	0.165298	0.990587			77.8825	227.369						1280	73.4	76.6	82.2	77.2	77.4	70.2	82.4	77.6	72.6	73.6	83	79	79.4	75.2	69.6	86	73	92.8	57.2	83.2	68.8	71.8	73	90.8	84	74.8	76.4	84.4	71.6	79	73.4	83
1216	26.1325	137.388	0.787483	1.23941	1216	0.169346	0.992389			78.5072	227.619						1216	74	76.8	83.8	80.2	79.6	71.2	81.4	79.4	74.2	71.8	83.2	81.6	80.2	76.8	71.4	89.8	72	93.2	56.2	82.4	68.2	72	75	92.6	85.8	72.8	76	87.8	71	81.8	71.2	82.2
1152	27.0273	137.524	0.832288	1.23355	1152	0.175145	0.993372			79.4021	227.755						1152	74.6	77.6	86.6	85	82.2	71.8	81.2	82.4	75.8	69.4	83.8	83.6	80.6	78.8	74.4	93.2	71.6	94.2	56	81.4	68	75	78.2	93.8	87.2	70.4	77	90.6	69.6	86.2	70	81.6
1088	28.149	137.575	0.878472	1.21796	1088	0.182414	0.993745			80.5237	227.806						1088	74.4	78	89.6	90	85	72.2	83.2	85.8	76.2	67.6	84.6	85.6	80.8	81.2	78.6	96.2	72.4	95.8	56.6	79.8	68.4	80	81.2	95.4	89	69.2	77.8	93.2	68.6	90.4	69.8	81.2
1024	29.5098	137.645	0.923614	1.19191	1024	0.191232	0.994251			81.8845	227.876						1024	73.4	77.4	94	95.2	87.6	72	86.6	88.4	76	66.2	87	87.2	80.8	85.6	83.4	97.8	73.8	98.2	58.8	77.4	69	86.2	84	97.6	90.8	69.2	78.6	95.4	67.6	95	71	81.4
960	31.083	137.654	0.960853	1.15855	960	0.201427	0.994311			83.4577	227.885						960	72.4	76.8	98.8	99.2	90.8	72.6	90.8	90.2	76	66.2	90.6	89.4	82	89.8	88.8	99	76.2	100.6	62.2	76.2	69.8	91.8	85.8	100.2	91.8	70.8	80.2	97.8	67.4	98.4	73	81.8
896	32.9407	137.738	0.995264	1.14965	896	0.213466	0.994921			85.3155	227.969						896	71	76.2	103.8	101.2	94.8	73.2	95	91.8	77.2	67	95	91	83.6	94.8	94.2	99	80.4	103	67	74.8	71.4	96.4	87.2	104.2	92.6	74.4	81.8	99.8	68	100.4	75.2	82
832	35.1964	137.922	1.03048	1.16436	832	0.228083	0.996247			87.5711	228.153						832	69.6	75.8	109.8	101.6	98.8	74	98.4	94	80.4	69	99.6	91.6	86.6	100.2	99.2	99.8	85	104.6	72.4	74.4	73.6	99.4	88	109.2	93	79	83.8	102.4	69.8	101.4	78.6	81.6
768	38.2479	138.142	1.07286	1.19477	768	0.247858	0.99784			90.6227	228.373						768	69	76	115.8	100.6	103	75	101.4	97	85.8	73.6	103.8	92.8	90.6	105.8	103	101.2	91	106	78.6	74.4	76.2	101.4	89	114.8	95	84.6	86.8	105.4	72.8	102.4	83	81
704	42.3881	138.309	1.11731	1.23212	704	0.274688	0.999047			94.7629	228.54						704	70.8	78.6	121.8	99.8	107	76.4	105	102.4	92.2	79.8	108	94.4	95.6	112	105.4	103.2	96.6	107.6	85.6	75.4	81	103.6	90.6	120.4	98.2	89.8	91.8	109.4	77.8	104.4	88.6	82.4
640	48.2356	138.441	1.16724	1.2653	640	0.312581	1			100.61	228.672						640	74.8	84.4	128.2	101.2	112.2	79.2	110	109	100.2	88.6	112.6	98	101.2	118.4	109	107	102.6	110.6	93.2	78.8	87.6	106.8	94	126	102.2	96	100.2	115.2	84.8	108.6	96.2	86.2
576	56.4191	138.14	1.2014	1.30204	576	0.365612	0.997826			108.794	228.371						576	82.8	94.4	135.6	106.8	117.8	84.8	117.2	117.2	109.2	101	119	105.2	108.6	126.2	114	112.2	108.4	115	101.8	84.4	97.4	112	101	131.2	109.6	103.4	111.8	123	94.8	115.6	106.8	94.2
512	67.6418	137.107	1.2344	1.3419	512	0.438339	0.990364			120.016	227.338						512	94	109	145	117.8	126	94.4	127.8	127	121.4	116.4	127.6	117.4	118.8	137.4	121.2	120.4	116	121.6	112.2	92.8	110.2	120.8	112.8	138.6	119.4	113.8	127	132.4	108.8	127.6	121.4	107.2
448	82.1387	135.033	1.26846	1.38324	448	0.532283	0.975381			134.513	225.264						448	108.4	128.6	157	134	137.4	108.4	140.4	138	138.6	134.2	139.2	134.8	132.2	151.6	132	132.8	126.8	130.8	124.8	104.8	126.4	133.4	130.6	148.8	131.8	126.6	145.4	143.6	125	143.2	140.4	123.6
384	99.5428	131.645	1.31018	1.43387	384	0.645067	0.950911			151.918	221.876						384	126.4	151.4	173.2	154.2	151.8	127.4	155.4	150.2	159.8	154.6	154.6	157	147.6	169.4	145.2	149.8	142	142.8	138.2	120.8	144.8	148.8	153.8	162.4	146.8	141.4	164.4	156	143.4	164.4	161.4	144.2
320	118.504	126.499	1.371	1.48584	320	0.767939	0.913738			170.878	216.73						320	146.2	174.4	191.8	175.4	169.6	148.8	169.8	164.6	183.2	175.2	172.2	182	165.2	188.4	160.8	170.2	161.4	156.4	151.4	140	164.2	164.6	179.8	178.6	163.2	156.8	182.2	168	162.4	188.8	183.4	166
256	136.326	119.287	1.44444	1.53329	256	0.883435	0.861641			188.701	209.518						256	165.4	194.2	210.8	194.4	186.4	168.6	182.2	178.8	205.4	194.6	190.6	205.6	181.6	205	174.8	192.2	182.8	171.2	162.2	159.4	182.2	178.6	204.8	194.8	178.6	170.6	196	179.4	179	211	203	185.4
192	149.398	109.862	1.50975	1.57319	192	0.968146	0.793563			201.773	200.093						192	180.8	206.6	223.8	206.4	198.2	181.8	189.4	190.4	222.2	210	206.2	223.2	194.4	215.2	184.6	210	201.6	183.6	168.8	175.2	195.6	187.8	221.8	206.6	190.2	180.2	204.8	188.4	189.6	226.2	216	198
128	154.314	98.3072	1.52201	1.59141	128	1	0.710101			206.689	188.538						128	189.8	208.4	225	209.8	201	184.4	189.8	196.8	229.2	218.8	214.2	231.6	200.8	216	187	218.6	212.6	189.6	169	183.6	201.4	190.4	226.2	210	196.2	184.2	206	193.2	191	227	220.4	200
64	148.883	85.0722	1.49638	1.57867	64	0.964806	0.6145			201.258	175.303						64	189.4	197.8	213	204.2	193	175.4	182.6	194.8	224.2	218	211.4	228.8	196.8	206.2	179.4	213.8	211.8	187	161.8	181.2	197.6	186	216.2	202.4	194.6	179.8	198.4	190.4	182.2	212.2	215.4	191
0	133.337	70.8082	1.46614	1.52842	0	0.864061	0.511468			185.711	161.039						0	179	177	189.2	190.8	175	157.4	168.6	183	207.2	206.2	195.8	216	183	186.4	162	195.6	197.8	174	147.8	168.4	183.6	174.2	192.6	184.4	184.8	167.8	181.8	180.8	164.8	185.6	200.8	171.8
-64	110.172	56.4887	1.47434	1.4442	-64	0.713945	0.408033			162.546	146.72						-64	159.4	150	158.6	172.4	151	133.6	149.6	163.6	179.8	185.4	169.6	195.8	160.2	161	138.6	168	173	152.2	129.4	147.4	160.8	156.4	162.4	158.8	168	148.6	157.8	163.2	140.8	153.4	178.6	147.2
-128	83.7057	43.0268	1.48762	1.33592	-128	0.542438	0.310795			136.08	133.258						-128	134.4	121	127.6	150.2	124.8	109.6	127.6	140.4	147.6	159	138.4	171.6	133	133.4	113.8	137	143.2	126.4	109.2	123.4	133.8	135	130.6	131.2	146.2	125.4	130	141	115.8	121.4	153	121
-192	58.1923	31.1711	1.43466	1.2116	-192	0.377103	0.225158			110.567	121.402						-192	108.2	95.2	101	126.6	101	87.6	106	116.2	115.4	131.4	108.4	146.6	105.6	109	91.4	108.8	113	101	91.2	100.6	107.2	113.2	102.4	105.4	122.8	103.2	103.2	117.2	92.8	94.2	126.6	97.2
-256	36.7861	21.3567	1.29132	1.0952	-256	0.238385	0.154265			89.1608	111.588						-256	85.2	76.2	81.4	103.6	82.4	70.4	87	96.2	88.2	106.2	83.6	122.8	83.4	90	73.8	86.6	89.2	79.6	76.2	82	84.6	94.6	81.2	84.8	100.2	84	81.6	96.2	73.6	75	103.4	78.4
-320	20.9284	13.8371	1.07758	1.00368	-320	0.135622	0.0999494			73.3031	104.068						-320	67.6	64.4	68.6	84.2	68.8	58.4	72.2	79.8	68	85.6	66.6	103	67.2	76.6	60.8	71.2	72	64.2	65.8	68.6	67.8	81	67.4	70.6	80.4	70.2	66.8	79.8	60.6	62	84.6	64.2
-384	10.3675	8.42062	0.868115	0.943237	-384	0.0671847	0.0608245			62.7423	98.6515						-384	56	59	60.2	68.8	60	50.8	61.8	68	55.2	70.2	55.8	86.6	57.8	68.2	52	61	61.2	53.8	59.6	59.8	56.4	72.4	60.2	61.4	65.6	61.4	58.2	68.4	52.2	54.2	70.6	54.6
-448	4.14691	4.79794	0.701127	0.90993	-448	0.0268732	0.0346569			56.5216	95.0289						-448	49.6	57.8	56.4	57.8	54.4	46.6	55.4	60.2	47.4	59.6	50.8	73.8	53.4	63	46.4	55.6	54.8	48	55	54.6	49.4	67.2	57.8	56	55.6	56	54.2	61.4	49.2	51	60	49
-512	0.946913	2.52165	0.60848	0.89156	-512	0.00613627	0.0182146			53.3216	92.7526						-512	45.8	58.6	52.8	50.8	51.8	45	52.4	55.8	44.2	52.2	48	64.6	52.6	59.6	43	52.2	51.8	45.2	52.6	51.8	46	64.8	57	53.6	49.4	52.6	53	58.2	49	49.6	53	46.4
-576	-0.504634	1.27835	0.565225	0.87984	-576	-0.00327018	0.00923389			51.8701	91.5093						-576	44.2	60.4	51	46.6	49.8	45.2	51.2	53.2	43.4	48.6	47	57.4	53	56.6	41	50.6	50.8	43.8	51.2	50.2	44	63.4	57.4	52.4	47	50.8	52	57	50.2	49.4	48	45.2
-640	-1.04896	0.589691	0.541016	0.86609	-640	-0.0067976	0.0042595			51.3258	90.8206						-640	43.8	61.6	49.6	45	48.2	46.4	51	52.4	43.4	46.8	46	52.4	54	54	40.2	49	50.2	43.8	49.8	49	42.8	62	58	51.6	47.4	49.4	51.8	57.4	51.4	50	45.8	45.8
-704	-1.23041	0.301031	0.53003	0.852561	-704	-0.0079734	0.00217443			51.1443	90.532						-704	43.6	62.4	50.2	45.2	47.2	48.8	51.4	52.2	43.6	46.2	45.2	49.2	55.4	51.6	40.4	47.8	49	43.6	48	47.6	41.4	61	58.2	53.2	49.2	48.6	51	58.2	52.4	51	44.8	47.2
-768	-1.19948	0.179381	0.51989	0.835458	-768	-0.00777298	0.00129572			51.1753	90.4103						-768	44.6	62.4	51.8	46.2	46.2	51.6	51.6	52.4	44	46.6	45	47.2	56.6	50.2	41	46.8	48.6	44	46.8	46.4	40.8	59.4	57.6	55	51.6	48.4	50.6	58	53.6	52	45.8	49.4
-832	-1.0469	0.0412371	0.521393	0.819038	-832	-0.00678423	0.000297867			51.3278	90.2722						-832	46.6	62.6	55.2	47.4	46.2	54.4	52	52	44.8	47.6	45.4	47	57.6	49.6	42.4	45.6	48.4	44.2	46.2	45.6	40	58	56.6	57.2	53.4	48.2	51	57.4	54.8	52.6	47	51
-896	-0.772675	0	0.526283	0.807333	-896	-0.00500716	0			51.6021	90.2309						-896	49.2	62.2	59.2	48.6	47.2	57	52	52.4	46.6	48.6	46.6	48.2	58.6	49.6	43.8	44.8	48.2	43.6	46	45	41	56.2	55.4	59.2	55	48.6	52.6	56	56.2	52.8	47.8	52.8
-960	-0.461335	-0.0515464	0.531857	0.799689	-960	-0.00298959	-0.000372334			51.9134	90.1794						-960	51	62	62.8	49.6	48.6	57.2	51.8	52.6	48.8	49	49	49.8	59.8	50.4	45.8	44.6	48.4	43.6	46	45.4	42	54.8	54.4	60	56.4	49	55	54	57.2	52.4	48.4	54
-1024	-0.147933	-0.0515464	0.530788	0.79756	-1024	-0.000958648	-0.000372334			52.2268	90.1794						-1024	51.8	61.4	65	51.2	50.4	56.2	51.4	53.4	51.6	48.6	50.8	51.4	61	50.8	47.6	44.8	48.4	44.4	46.6	46.8	43.8	54	54	60.6	56.2	49.6	56.8	52.6	56.8	51.4	48.8	54.2
-1088	0.0232013	-0.0453608	0.530456	0.798794	-1088	0.000150351	-0.000327654			52.3979	90.1856						-1088	51	60	65	52.8	52.4	54	50.8	52.8	54.4	48.2	52.8	52	62.2	50.4	49	45.4	49	45.8	47	49.2	45.4	54.2	54.4	59.8	55.6	49.4	58.4	51.8	55.8	50.6	48.4	54
-1152	0.140727	-0.0268041	0.532434	0.801163	-1152	0.000911953	-0.000193614			52.5155	90.2041						-1152	49	57.8	63.8	53.8	54.2	51.8	50	52.6	56	47.2	53.6	52.2	62.6	49	49.4	46.2	50	48.8	47.4	51.8	46.2	55.4	55	58.4	54	49.6	59	51.2	54.2	50.2	48.8	53
-1216	0.161346	0	0.541707	0.805214	-1216	0.00104557	0			52.5361	90.2309						-1216	46.2	55.6	61.4	54	55.4	50	49.2	52	56.6	46.4	54	51.2	62.2	47.6	49.8	47.2	52	52.4	48	54.2	47.6	57.4	55.4	56	51.6	50.2	58.4	51.4	51.6	49.8	49	51.8
-1280	0.179902	0.0391753	0.539795	0.815385	-1280	0.00116582	0.000282974			52.5546	90.2701						-1280	43.8	53.6	58	54.8	55.8	49.8	48.2	51.4	56.2	46.2	53.8	50.8	60.6	46.8	49.8	47.8	54.4	55.4	48.4	56.6	48.8	59.4	55.2	53.4	49.2	51.2	56.2	51.2	49.2	50.2	49.8	50
-1344	0.169593	0.0329897	0.544392	0.825266	-1344	0.00109901	0.000238294			52.5443	90.2639						-1344	41.2	51.8	55.2	55.2	55.2	50.8	47.2	50.8	55.2	46.2	52.6	51.2	58	46.4	49.4	48.6	57	57.4	49	58.4	50	60.8	53.8	50.6	47.6	53	53.8	51.4	46.6	50.6	50.6	48.4
-1408	0.0898465	0.0169888	0.541077	0.844548	-1408	0.000582232	0.000122715			52.4646	90.2479						-1408	40	50.8	53.2	55.4	53.6	52.2	46.2	49.6	54.6	46.8	51	52.6	55	46.4	49.4	49.6	58.6	58	49.6	59.2	51.8	61.2	52.4	48.4	46.8	54.4	51.2	52	45.2	51.4	50.8	47.4
-1472	0.0981798	-0.0371778	0.536218	0.85828	-1472	0.000636234	-0.000268546			52.4729	90.1937						-1472	39.6	50.6	51.6	56.2	52	54.2	45.4	48.8	53.8	47.6	49.8	56	51.6	47.4	50	50.4	59.4	57	50.2	59	52.6	60.6	51.6	47.8	46.8	55	49.4	52.8	45.2	52.4	51.2	46.4
-1536	0.158596	-0.114261	0.536334	0.873027	-1536	0.00102775	-0.000825341			52.5333	90.1167						-1536	40.2	51.2	50.6	57.4	50.8	55.8	44.6	48.2	53.4	47.8	49.4	59.8	49	48.8	51.4	50.4	58.8	56.2	50.8	57.8	53.2	58.6	51.6	48.4	48.4	55.8	48.2	53.8	46.6	53.4	50.8	46
-1600	0.16693	-0.178845	0.538313	0.878338	-1600	0.00108175	-0.00129184			52.5417	90.0521						-1600	42	52.8	49.8	58	50.6	57.2	44	48.4	53.6	48.4	50.2	62.8	47.4	50	52.8	50.2	58	55.8	51.6	56.2	53.2	56	52.2	49.8	49.6	55.4	48.4	55.2	49	54.2	50.2	46
-1664	0.133596	-0.160095	0.545779	0.877289	-1664	0.000865745	-0.00115641			52.5083	90.0708						-1664	44.6	53.8	49.4	59.2	51.2	57.8	44	49	53.6	48	51.6	64.6	46.6	51	54.6	49.2	56.4	56.6	53	54.6	53.4	53.8	54.4	51.6	51.6	54.4	49.2	56	51.4	55	49.6	46.4
-1728	0	-0.224612	0.547423	0.863981	-1728	0	-0.00162244			52.3747	90.0063						-1728	47.6	55.8	49.2		52.6	58.2	44.6	50.4	54.6	47.8	53.4	64.4	47.2	51	55.2	48.2	54.6	58	54.2	53.8	53.6	51.6	56.8	53	52.6	53.2	50.2	57.4	53	56.2	48.8	46.4
-1792	-0.115789	-0.165665	0.553854	0.836409	-1792	-0.00075035	-0.00119664			52.2589	90.0653						-1792	50.2	57.6	50		54.8	58.6	45.6	52.2	55.2	47	55.2	62	48	51.2	54.2	47	53.2	60.4	56.4	54.2	53.6	50.4	59.4	53.6	54.2	52.4	51	59.2	54	56.8	47.8	46.6
-1856	-0.310221	0.162621	0.566044	0.797884	-1856	-0.00201032	0.00117465			52.0645	90.3935						-1856	52.6	59.8	51		56.4	58.4	47.6	54	56	46	57.2	59	48.8	51.4	52.2	45.4	52.6	62.2		54.6	54.2	50.2	61.2	53.2	54.6	52.4	50.8	61.4	55.2	56.4	47	47.6
-1920	-0.26936	0.289502	0.572768	0.778709	-1920	-0.00174554	0.00209116			52.1054	90.5204						-1920	54	61.8	52.8		57.8	58.8	50	55.2	56	45.6	59.4	56.4	49.2	51.4	49.6	44.4	52.4	63		55.8	54.4	51.2	62.6	52	55.4	52.4	50.2	63.4	56.2	55.4	46.6	48.8
-1984	0.053524	0.41255	0.563784	0.784357	-1984	0.000346852	0.00297997			52.4283	90.6435						-1984	55.4	63.2	54.8		58.4	59	53.2	55.6	55.6	45	61.6	55.2	49.8	51.6	47.6	44	51.8	62.6		56	54.8	53.6	63.2	50.8	57.6	53.2	49	65	56.4	52.8	46.4	50.6
-2048	0.318741	0.52342	0.570841	0.792403	-2048	0.00206554	0.00378081			52.6935	90.7543						-2048	55.6	63.8	57.2		57.8	59.6	56	55	54.4	44	63.4	55.8	49.6	51.8	47	44.4	51.8	61.4		56.2	55.2	56.4	62.4	49.6	60.4	53.8	48.6	66.2	56.6	49.8	46.6	53.4
-2112	0.568741	0.660377	0.575203	0.807318	-2112	0.00368561	0.00477009			52.9435	90.8913						-2112	54.2	63.8	58.8		56.2	60.4	58	54	53	43.8	63.2	57.4	48.8	51.2	46.4	45.4	51.6	59.8		56.8	55.6	58.6	61.4	47.8	63.4	55	48.6	66.2	56	46.8	47.4	56.2
-2176	0.764394	0.808203	0.584821	0.825625	-2176	0.0049535	0.00583787			53.1391	91.0391						-2176	52.2	62.6	60.2		52.8	61.4	59.6	52.8	52.4	43	62.6	59.2	47.6	50.8	45.8	47	51	58.2		56.4	56	60	59.4	46.8	65.6	56.6	49.6	66	55.2	44.2	49	58.8
-2240	0.656032	1.11852	0.576448	0.850913	-2240	0.00425128	0.0080794			53.0308	91.3495						-2240	49.2	60.8	59.8		49.4	62.2	59.8	51.4	52.4	43.2	60.6	59.8	46.4	50.2	46	48.8	51.6	56.4		55.6	56	60.2	57	46.4	66.4	57.8	50.6	65.6	53.2	42.8	50.8	60.6
-2304	0.491197	1.34929	0.562539	0.869475	-2304	0.0031831	0.00974632			52.8659	91.5802						-2304	46.6	58.6	58.6		46.2	62.4	59.6	51.2	52.2	43.2	58.4	58.8	45.8	49.4	46	50.6	53	54.8		54.4	55	59.6	54.6	47	65.8	58.6	51.8	65.8	52.2	42.2	52.8	61.2
-2368	0.260428	1.55369	0.535887	0.884927	-2368	0.00168765	0.0112227			52.6352	91.7846						-2368	45.2	56.8	57.4		44.4	62.4	58.8	51.6	52.6	44.4	56.8	56.4	45.4	49.8	46	52.4	55.6	53.6		53.4	53.6	58.2	52.8	48.4	63.6	58.8	51.6	65.2	51.2	42.2	55	61
-2432	-0.0347368	1.65352	0.509945	0.898701	-2432	-0.000225105	0.0119438			52.34	91.8844						-2432	44.8	55.4	55		43.6	61.4	56.8	52.2	53.2	46.2	56.2	53.4	45.8	51	46	53.2	58.4			53	51.2	57.2	52.2	50.6	60.6	58.2	51.2	64.2	50.4	42.6	56.8	59.8
-2496	-0.241404	1.80241	0.488586	0.901167	-2496	-0.00156437	0.0130193			52.1333	92.0333						-2496	46	54.6	53		43.8	60.4	55	53.4	54.2	48	56.2	50.4	46.4	53.4	46	54.2	61.4			53.4	48.8	55.8	52.6	53.2	58	57.2	49.6	62.2	50.2	43.6	57.8	59
[truncated: 163 more columns]

## Sheet: Fig. 1 E right
Position	Slow Hydrolysis average background subtracted profile	Fast Hydrolysis average bacakground subtracted profile	Slow Hydrolysis std error	Fast Hydrolysisstd error	Position	Normalize Slow Hydrolysis average profile	Normalized Fast Hydrolysis average profile	slow hydrolysis average	fast hydrolysis average				Slow Hydrolysis	growth event 1	growth event 2	growth event 3	growth event 4	growth event 5	growth event 6	growth event 7	growth event 8	growth event 9	growth event 10	growth event 11	growth event 12	growth event 13	growth event 14	growth event 15	growth event 16	growth event 17	growth event 18	growth event 19	growth event 20	growth event 21	growth event 22	growth event 23	growth event 24	growth event 25	growth event 26	growth event 27	growth event 28	growth event 29	growth event 30	growth event 31	growth event 32	growth event 33	growth event 34		fast hydrolysis
2496	59.7142	6.10787	4.85931	1.09785	2496	0.329673	0.0395808	105.849	58.4826					125.6	43.019	103.259	49.2	118.8	119.6	124.2	52.4	55.6	111.2	112.8	124.6	119.4	110.2	120.6	123.6	65.6	119.2	123.4	119.8	117.8	116	123.2	105.2	64.6	134.8	130	112	106.8	123.4	115	42	116.4	149.6
2432	60.9742	6.41462	4.68558	1.11379	2432	0.336629	0.0415687	107.109	58.7894					122.2	44.814	105.903	49.6	119.8	126	125	57.4	61.8	112.2	112.2	126	121.8	110.2	117	123.2	75	119.4	124	120.8	121.6	114.2	123.2	104.6	69	135.2	130	111.2	107	122.4	115.4	42.6	118.6	152.4
2368	62.5397	6.81684	4.47174	1.1344	2368	0.345272	0.0441752	108.675	59.1916					121.4	46.019	108.525	50.4	119.8	129.4	127.2	65.2	69.8	112.2	112.4	126.4	124	112.4	112.8	121.4	86	120.8	124.2	121.6	124.8	114	124	106.4	75.8	135.2	128.8	112	107.4	122.8	115.4	42.4	120.8	153.2
2304	64.4766	7.38151	4.21631	1.142	2304	0.355965	0.0478344	110.612	59.7562					123	46.824	111.374	52.6	119.4	129.8	130.2	75.6	80.2	111	112.8	126.8	126.6	116.2	109.8	118	97.8	122.4	125	121.8	127.8	115.4	124.4	110.2	85.2	135	127.6	112.6	109.4	124.4	115.2	42.4	122.2	151.8
2240	66.7487	8.20235	3.94349	1.15854	2240	0.368509	0.0531536	112.884	60.5771					126.8	47.412	113.637	58	118	127.6	134.4	87.8	91.4	109.6	114	128	128.2	121.2	107.8	114.6	109.2	124.6	125.8	122	129.2	117.4	125.4	115	97	134.4	127.6	113.2	113	126.2	114.6	43.6	123.2	148.2
2176	69.1173	9.16693	3.72106	1.17451	2176	0.381586	0.0594044	115.252	61.5417					132.2	47.201	115.783	67.4	116.2	124.6	138.2	99.8	101.4	108.6	115	130.2	129.6	125.8	107.8	112	118.8	126	126.8	122.2	129.6	120.6	126.2	119.6	109.4	133.2	128.2	113	116.4	128.2	114.8	46	123.2	144.6
2112	71.3101	10.2129	3.56027	1.16865	2112	0.393692	0.0661826	117.445	62.5876					137	46.806	116.732	79.2	114	120	142	110	110	108.4	116.4	132.8	130.2	129.4	109.2	109.4	125.6	126.6	128	123	129	123.8	127.2	124.2	121.2	131.8	130.2	112.2	119.2	130	115.8	50	122.4	141.4
2048	73.2464	11.3428	3.40064	1.16382	2048	0.404382	0.0735046	119.381	63.7175					140.6	47.204	116.567	93.6	112.2	116.6	143.8	118.2	115.8	108.6	118.4	136	131	130.6	110.8	108.6	130.4	126	129.4	124	127.2	126.6	128	127	132	130.4	132.4	110.6	120.2	131.4	117.4	56.8	121.4	139.2
1984	74.8302	12.4727	3.24125	1.13523	1984	0.413126	0.0808267	120.965	64.8474					142.4	48.424	115.798	107.6	110.6	113.4	144.2	123.6	119.4	109.2	120.2	138.2	131.6	130.2	111.8	109.6	132.6	124.8	130.8	124.6	125.6	128.4	129.4	128.8	141.2	128.8	134.6	109.2	120	133.2	119.6	66.6	120.6	137.8
1920	76.1035	13.617	3.05732	1.08381	1920	0.420155	0.0882423	122.239	65.9918					142.2	51.005	114.508	119.8	110.2	111.2	143.6	127.2	120.6	110.4	122.2	139.2	131.6	128	113.4	111.8	132.8	122.6	131.6	125.6	123.6	128.6	130.4	129.6	149	127.8	136	108.4	118.4	135.2	122.8	79	120.6	137.2
1856	77.1813	14.7284	2.85482	1.02834	1856	0.426106	0.0954441	123.316	67.1031					140.6	55.225	114.333	129.2	111	110.8	142.2	130	120.8	111.6	123.2	138.6	131	124.6	114.6	115.4	131.2	120.6	132.2	125.6	121.8	128.6	132.6	128.8	155.4	128.2	136.4	108.4	116.4	137.2	125.6	93.4	120.2	137
1792	78.2265	15.8912	2.67037	0.970076	1792	0.431876	0.10298	124.362	68.266					139.2	60.805	114.69	136.4	113.2	112.2	141.2	132.6	120.2	113.6	123.4	137	129.6	121.6	116.2	118.8	129.2	118.8	132	125	120	128.4	135.2	127.6	159.6	129.2	136.4	109.8	114	138.4	128.2	107.6	120.4	137.8
1728	79.2957	17.1016	2.50074	0.9229	1728	0.437779	0.110823	125.431	69.4763					138.4	67.999	116.048	140.6	116.4	115	140.4	136	120.4	116	122.6	134.4	127.4	120	117.4	122	127	118.4	132	123.6	118.4	128.4	138.4	126.8	161.2	130.8	137.2	111.2	112	139.2	129.4	120.2	120.2	139.2
1664	80.277	18.4562	2.32666	0.887758	1664	0.443197	0.119602	126.412	70.8309					138.2	76.203	117.61	142.4	119.6	118.8	139.6	140.6	120.4	119	121.6	131.8	124.6	121.4	119.2	123.8	125.8	119	131.8	122.2	118	128.6	140	126.2	159.8	132.4	138.2	112.8	110	140	128.4	129.4	119.8	140.8
1600	81.199	19.8129	2.13339	0.856804	1600	0.448287	0.128393	127.334	72.1876					138.2	85.316	119.243	141.4	122.4	123.2	139.4	145.8	122	122.2	120.8	130.4	122.4	124	120.6	124.8	125.8	120.6	131.6	121.4	118	129.6	139.6	126	155.8	133	140.4	114	108.4	139.6	126.2	134.8	119.8	142.6
1536	82.0511	21.1098	1.96199	0.81276	1536	0.452991	0.136798	128.186	73.4845					139.6	93.857	120.274	138.2	124.6	127.6	139.2	151.2	123	125.4	120.8	130	120.8	128.8	121.8	126.6	126	122.4	131.6	122.4	118.6	130.4	138.2	126.6	151	133.6	142.6	114.6	107.4	138	123.4	135.8	120.6	143.4
1472	82.5207	22.3057	1.83379	0.756716	1472	0.455584	0.144547	128.656	74.6804					142.2	101.593	120.507	132.6	124.4	131	139.4	154.8	125	128	121.6	130.6	120.8	133.2	121.6	128	126.4	124.4	131.2	124.8	119.4	132	135.4	127	145.6	133.2	146	114.2	106.8	134.6	120.6	133.2	121.2	143
1408	82.9883	23.2583	1.77235	0.712957	1408	0.458166	0.15072	129.123	75.633					145	108.856	119.942	126.4	123.6	133.8	140.4	156.8	126.6	129.4	122.2	132	122.2	136.8	121	129.8	127.6	127	130.4	128.2	120.6	133	133	127	141	133.4	148.4	113.6	107.8	130.6	118.6	128.6	123.2	143.4
1344	83.3449	24.0232	1.80264	0.686592	1344	0.460134	0.155677	129.48	76.3979					147.6	115.747	118.973	119.6	122.6	134.8	141.2	157.8	128	130	122	133.4	125.2	138.4	119.6	131.4	129.2	130.2	130.4	132	122.6	133.8	131.2	126.8	139	133.4	149.8	112.4	109.4	125.8	117.6	123.6	124.2	144.6
1280	83.694	24.5325	1.86668	0.680911	1280	0.462062	0.158978	129.829	76.9072					149.4	122.981	117.011	114.6	121.2	135	142	157.8	129.2	130	121.4	135	128.4	138.2	118.8	132	130.4	134	130.4	135.6	124.6	133.8	131.2	126.8	138.4	133.4	149.4	111.4	111.2	122	118	119.2	125	146.4
1216	84.1695	24.9799	1.92647	0.699639	1216	0.464686	0.161877	130.305	77.3546					150	129.447	114.909	111.4	120.8	135.8	141.8	157	130.6	130.8	120.6	136.4	132.6	136.2	118.8	132	131.8	137.8	130.8	137.8	127.2	132.8	131.4	127	139.8	133.6	148.4	111.2	112.6	120	118.6	117	124.8	148.6
1152	84.5904	25.5077	1.91143	0.741804	1152	0.46701	0.165298	130.726	77.8825					149	135.134	113.735	110.4	121.2	136.2	141.8	156.2	131.2	133	120.4	137.4	135.4	133.4	119.8	130.6	132	139.6	130.4	139	129	131.4	131.4	127.6	141	134.4	147.4	112.2	114.2	119.8	120.2	117	124.2	149
1088	85.0037	26.1325	1.84604	0.787483	1088	0.469292	0.169346	131.139	78.5072					147	138.893	112.628	110.6	122.6	137.6	142	154.8	132	136.4	122	138.4	136.8	130	121.4	128.4	132	139.2	130.8	138.6	131	129.6	131	128.4	142.2	135.6	146.8	114	116	120.4	122	118.4	122.8	148.4
1024	85.4038	27.0273	1.73388	0.832288	1024	0.471501	0.175145	131.539	79.4021					144.6	139.466	112.457	112	125	138.4	143.2	153.4	132.2	139.8	125	140	137.8	126.2	123.8	125.8	130.6	137.2	130.4	137.2	132.8	128.6	130.6	130	143.2	137.2	146.6	117	118.6	122.4	123.6	120.2	121	146
960	85.84	28.149	1.63693	0.878472	960	0.473909	0.182414	131.975	80.5237					142	138.473	112.881	113.8	127	137.6	145.2	151.6	131.4	142.6	129.6	142.4	137.8	123.4	126.6	123.6	129.6	133.6	130.8	135.4	134.6	128.2	130.4	132.8	144.8	138.8	146.6	120.2	121	124.8	124.4	122.4	119.6	143.2
896	86.4	29.5098	1.60052	0.923614	896	0.477001	0.191232	132.535	81.8845					138.6	136.136	113.258	115.8	128.8	136.4	148	148.2	129.2	144.4	135.6	146.2	137.2	122.2	129.6	121.2	129.2	130.4	131.4	134	137.8	130	131.8	136	147.2	139.8	146.8	123.8	124.6	126.4	124.6	123.6	117.8	140.2
832	87.2177	31.083	1.63562	0.960853	832	0.481515	0.201427	133.353	83.4577					135.6	134.957	113.638	118.4	130.4	134	151.2	144.2	127.2	144.6	140.8	150.2	135.6	123.6	132.6	120.2	129	128.2	132.8	133.4	141	133.6	135.4	138.6	151.6	141.4	145.2	127.4	128.6	127.6	123.6	123.4	117.2	138.8
768	88.5518	32.9407	1.72865	0.995264	768	0.488881	0.213466	134.687	85.3155					132.8	135.381	113.775	121.8	132	131.4	155	140.6	126	144.4	145.4	153.6	134	127.4	135.4	121	128.6	128.4	135.2	134.4	144.8	138.6	140.4	141.4	156.8	142.2	143.4	130.8	132.4	128.4	123.2	123.8	118	138.6
704	90.5625	35.1964	1.81151	1.03048	704	0.499981	0.228083	136.698	87.5711					131.4	138.557	114.162	125.8	135.4	129.2	158.2	139.6	126.6	142.8	148.2	155	132	133.8	138.8	123.2	128.6	131	139.4	136.6	149.4	144	146.8	144	160.8	144.2	141.4	134.6	137	128.6	122.8	125.8	120.6	139.4
640	93.2883	38.2479	1.86137	1.07286	640	0.51503	0.247858	139.423	90.6227					130.8	144.084	114.913	131.2	140.4	129.4	160.8	142	128.6	141.4	150.2	155.8	130.8	141.2	142.2	128	129.8	135.8	143.8	139.6	154.2	149	152	145.8	163.6	146.4	140.2	137.8	141.8	128.4	123.8	129.8	124.8	142
576	97.1447	42.3881	1.89712	1.11731	576	0.53632	0.274688	143.28	94.7629					131.8	152.354	117.159	137.6	147.4	131.4	163.8	148.6	132	140.6	152.2	156.4	131.8	149.6	145.8	133.6	132.4	142.8	149.8	143.2	160	152.8	156.2	147.8	164.4	150	141	141.6	148.4	129.2	126	136.8	130.2	146.8
512	102.27	48.2356	1.8756	1.16724	512	0.564617	0.312581	148.405	100.61					136	162.216	121.759	146	155.6	137	166.4	157.8	137	141.4	155.2	159	136	157.6	150.4	140.6	138	150.6	156.2	147.2	165.4	155.6	159.2	150.4	163.4	154.6	145.2	145.8	157	131	131	145.6	136.4	153.2
448	108.869	56.4191	1.8433	1.2014	448	0.601049	0.365612	155.004	108.794					142.8	173.024	129.518	155.4	163.6	145	168.8	168.6	143.8	144.6	160.2	164.2	144.2	166.6	156	148.6	146.2	159.8	163.8	152	171.6	158.2	161.8	154.8	162.6	160	152.4	150.6	167.2	135.4	137.8	155.8	144	161.2
384	117.5	67.6418	1.77643	1.2344	384	0.648699	0.438339	163.635	120.016					152.8	184.268	140.128	166.2	172	154.8	172.6	180	153.6	150.8	167.2	173.4	156.6	176	164.4	158.6	156.4	169.6	173	158.2	177.8	162.2	166.4	162	163.2	167.2	163.2	157.6	178.2	143.8	148.4	167.6	154.8	170.6
320	128.324	82.1387	1.62342	1.26846	320	0.708456	0.532283	174.459	134.513					166	194.514	154.493	178	181.4	167	178.6	191.6	166.8	161.2	176.4	185.2	172	186.6	175.4	171.8	169.2	179.6	182.8	168.2	185.2	168.2	173.8	173.2	166.4	176.2	175.8	168	189.6	156.6	162.6	180.6	168.2	180.4
256	140.96	99.5428	1.40268	1.31018	256	0.778215	0.645067	187.095	151.918					181.2	203.359	171.659	191.6	192.4	181.2	187.2	202.6	181.8	175.4	187.4	197.2	188.2	197.6	189.6	186.8	182.8	190.4	194.8	182.4	194.2	176.8	182.6	187.4	174.2	186.6	190.6	180.6	200.8	173	179.4	194.2	184.2	191
192	154.662	118.504	1.15937	1.371	192	0.853863	0.767939	200.797	170.878					197	211.541	190.152	205.2	204.8	197.2	198.8	213.6	198	193	199.6	208	203.6	209.4	205.2	203.8	197.2	202.2	206	199	205	186.6	193.4	203.2	185.6	198.6	204.2	195.8	211.4	191.2	197.4	207.6	201.6	202.2
128	167.649	136.326	0.978316	1.44444	128	0.925565	0.883435	213.784	188.701					211.4	219.043	207.826	217.8	217.6	212.8	211.6	222.6	213	209.8	212.2	217	216.6	219.4	218.6	218.6	211.4	214.4	216.6	216	216.4	195.8	204.6	217.6	199.2	210	215.8	210.8	221.2	209.4	213.4	219.2	217.8	213.2
64	177.433	149.398	0.872634	1.50975	64	0.979578	0.968146	223.568	201.773					222.8	224.396	221.109	226.8	226.8	224.8	222.8	228.4	223.8	223.4	223	223.6	225.6	226.6	227.8	228.8	223	224.4	224.8	228	225.8	203.2	213.8	227.2	211.6	218.8	223.4	222.4	227.6	223.6	225.4	227	227.8	223
0	181.132	154.314	0.797364	1.52201	0	1	1	227.267	206.689					228.8	226	226.475	229.2	229.6	230	229.6	229.6	229	229.2	228.8	226.4	229.2	228.2	229.2	229.4	229	229.6	229	229.8	229.6	205.8	218.4	229.6	219.2	221.8	225.8	228.4	228.8	229	228.2	229.2	228.6	228.6
-64	176.543	148.883	0.819637	1.49638	-64	0.974664	0.964806	222.678	201.258					227.2	222.061	221.185	223	223.2	225	229.4	223	224.8	225.2	228.2	226.4	226.2	222.8	222	218.4	226.8	227.6	226.2	218.4	224.6	204.6	213.8	223.4	218	217.6	221.4	226	222.6	223	220.4	223.8	216.6	228.2
-128	162.933	133.337	1.25811	1.46614	-128	0.899527	0.864061	209.068	185.711					217.4	211.326	204.189	208.4	207.4	209.4	222.4	208.2	210.4	212.8	219.6	221.8	214	209.2	206	196.4	215.2	216.8	214.8	194.8	210	197.2	200.2	207.2	208.2	205.4	210	214	206.4	204.8	201.4	210.2	192.8	220
-192	141.374	110.172	1.95167	1.47434	-192	0.780501	0.713945	187.509	162.546					199.4	193.797	177.898	186	183	184.2	209	186.4	186.8	193.8	202.8	210.8	193.6	188.6	184	166.4	195	197.8	194.6	163	186	182.6	177.8	183.6	190.4	186.4	191.4	194	182.2	177.4	174.4	187.4	160.6	204.2
-256	114.646	83.7057	2.57575	1.48762	-256	0.632945	0.542438	160.782	136.08					176	170.363	147.009	158.8	153.8	154.4	191.2	159.4	156.4	171.4	179.6	193.2	166.4	162.6	158.4	133	169.2	172.2	167	129.8	156.2	161.8	149.8	155.4	167.6	163.2	167.2	167.6	152.2	145.6	143	159	126	181.8
-320	86.4932	58.1923	2.90836	1.43466	-320	0.477516	0.377103	132.628	110.567					149.4	144.673	116.092	130.4	123.6	123.6	170	131.2	124.6	149	152.4	168.4	136.4	135.2	133	102.8	141.8	143.6	137.2	101.4	125.4	136.4	121.4	125.6	142.6	138.4	141	138.4	120.8	114.6	112.2	127.8	94.2	155.8
-384	60.3947	36.7861	2.90599	1.29132	-384	0.33343	0.238385	106.53	89.1608					123.6	118.875	90.141	104.8	96.6	96	147.2	105.2	96	127.2	124.4	139.6	107.8	109	110	78.8	115.6	115.8	108.6	81	97.4	109.6	95.6	99	119	114.8	115.6	110	92.6	88.4	85.8	98.8	68.6	130.6
-448	38.794	20.9284	2.62255	1.07758	-448	0.214176	0.135622	84.9291	73.3031					100.6	96.887	71.704	83.8	76	74.4	124.4	84.8	74.2	107.8	99.2	110.2	84.8	86.4	90	62.2	93.2	91.6	85.4	68	75.2	86.2	75.2	77.4	98.2	93.8	93.8	85	70.4	68.6	65.8	75.2	50.2	107
-512	22.7479	10.3675	2.20255	0.868115	-512	0.125587	0.0671847	68.883	62.7423					82.6	80.238	59.784	67.6	62.4	59.2	103.2	70.6	59.4	91.4	78.8	85	68.6	69.2	74	52	75.4	73.8	68	61	59.8	68	60.6	61.2	81.6	77.6	77	65.2	55	55.4	53.2	59	38.8	87.4
-576	11.9255	4.14691	1.74264	0.701127	-576	0.065839	0.0268732	58.0607	56.5216					68.4	68.449	53.014	57	54	49.8	84.8	61.8	50.6	78.2	64.6	65.4	58.8	57.8	62.6	46.6	62.6	61.6	57.4	57.8	49.8	55.4	51.4	51.2	68.2	65.4	66	51.4	46.4	47.8	45.8	49	33.2	71.8
-640	5.26554	0.946913	1.35852	0.60848	-640	0.0290702	0.00613627	51.4007	53.3216					58.4	61.583	49.24	51	49.6	45	71.4	56.2	46	67	55.4	53.4	53.8	50.6	55	44	54.4	53.6	51.2	55.6	44.2	47.4	46.2	45.4	58.4	57.8	59.4	42.6	42.2	44.6	42.8	42.6	31.6	60
-704	1.60848	-0.504634	1.04698	0.565225	-704	0.00888019	-0.00327018	47.7436	51.8701					51.8	56.65	46.633	48.8	47	43.2	62	53.6	44.2	58.6	49.8	47.2	51	46	51	43	49	49	48.6	54.2	41.8	43.6	44	42.6	51.4	52.8	55.6	37.4	41.2	45.2	42	39.6	33	51.8
-768	-0.251222	-1.04896	0.861032	0.541016	-768	-0.00138695	-0.0067976	45.8839	51.3258					48	53.438	44.815	48.8	45.4	43	57	50.8	43.4	52.6	45.8	45.4	49.4	43.4	49.6	42.2	46.4	47	47.2	52.4	41.2	42.2	43.8	41.4	47	49.2	53.8	34	41.8	47	42.4	37.6	35.4	47.2
-832	-0.998339	-1.23041	0.749704	0.53003	-832	-0.00551167	-0.0079734	45.1368	51.1443					46	51.022	43.429	49	44.4	44.2	54.2	49.2	42.6	48.2	43.4	45	48	41.4	48.8	41.6	45.2	46.6	47.2	50.4	41.2	43	44.8	41.4	45	47.2	53	32.4	43	49.4	43.2	37	38.8	45.4
-896	-1.12916	-1.19948	0.721738	0.51989	-896	-0.00623393	-0.00777298	45.006	51.1753					45.2	48.58	42.223	49.2	44	45.2	54.4	48.2	42.2	45.2	41.6	45.8	46.8	40.4	49	40.2	45.6	47.2	47.6	48.8	41.8	45.2	46	41.6	44.2	45.6	52.6	32.4	43.8	51.6	43.4	37.6	41.6	45.4
-960	-1.12205	-1.0469	0.718752	0.521393	-960	-0.00619463	-0.00678423	45.0131	51.3278					44.8	47.221	41.424	48.8	44.4	45.6	54.6	47.8	42	43.2	40.2	45.4	45.4	39.6	48.6	39.6	45.8	48	48.2	46.8	42.4	47	47.6	41.8	44.8	45	53	32.4	43.8	51.6	44.2	39	44.2	46.2
-1024	-0.946604	-0.772675	0.72452	0.526283	-1024	-0.00522605	-0.00500716	45.1885	51.6021					44.4	45.793	41.417	48	45.8	45.6	55	47.6	42.6	41.4	39.6	45	44.6	39.4	48.4	39.6	46.4	49.2	49.2	45.2	42.4	49.2	48.8	42	45.6	44.8	53.6	33.6	42.8	51	44.4	40.8	45.2	48
-1088	-0.789663	-0.461335	0.709607	0.531857	-1088	-0.0043596	-0.00298959	45.3455	51.9134					43.8	45.142	41.604	46.8	46.8	44.6	55.2	48	43.6	40	40	45.4	44	39.8	47.2	41	46.6	50	49.6	43.2	43.2	51	49.4	42.6	46.6	45.2	54	35	41.4	49.2	44.8	42.6	45.4	49
-1152	-0.687251	-0.147933	0.700169	0.530788	-1152	-0.0037942	-0.000958648	45.4479	52.2268					42.8	44.422	41.606	45.8	47.6	43	55	48	44.4	39.4	41.4	46.4	44.2	40.8	46.2	43.6	46.6	50.6	49.8	41	43.4	52.2	50.2	43.6	47.2	45.2	54.2	36.4	40	47.2	45	44.2	44.6	49.2
-1216	-0.462133	0.0232013	0.726453	0.530456	-1216	-0.00255137	0.000150351	45.673	52.3979					41.4	44.413	41.996	44.6	47.4	42.4	55.2	48	44.8	39	43.6	48	44.2	42	45.2	47.2	46.6	50.4	49.6	39.4	44.4	52.6	51.6	45.2	47.4	45.6	54	38.2	38.8		45.4	45	44	49.6
-1280	-0.0626333	0.140727	0.724891	0.532434	-1280	-0.000345789	0.000911953	46.0725	52.5155					40.6	44.92	42	43.8	46.4	42.2	55.4	46.8	45	39	45.2	50.2	44	43.4	44.2	50.8	46.4	49.6	48.6		45.2	52.8	52.6	47.8	47	46.2	53	40.2	38.4		45.4	45	42.8	49.4
-1344	0.184617	0.161346	0.767253	0.541707	-1344	0.00101924	0.00104557	46.3197	52.5361					40.2	45.828	42.004	43.8	44.2	43.4	55.6	44.8	44.6	39.8	46.2	51.6	44	45	44	53.4	46	48.6	47.8		45.6	53.2	54.6	51	46.6	46.4	52.4	41.6	38.6		45.2	44.8	41.6	49.8
-1408	0.36021	0.179902	0.78783	0.539795	-1408	0.00198866	0.00116582	46.4953	52.5546					41.2	47.447	42.204	44.6	42	44.8	55	42.8	43.8	40.8	46.6	51.4	44	46.6	43.8	54.4	46	47.6	46.8		45.8	53.8	56.6	52.6	46	47	51.6	42.4	40		44.4	44	41.2	50.6
-1472	0.579609	0.169593	0.833328	0.544392	-1472	0.00319993	0.00109901	46.7147	52.5443					42.2	49.357		45.8	39.8	46.2	53.8	41.2	43	41.4	46.4	49.8	44.4	48	44.4	53.6	45.8	47	46.2		45	54.2	59	53.4	46.2	47.2	51.4	42.8	41.8		43.4	43.4	40.6	51.4
-1536	0.670351	0.0898465	0.860174	0.541077	-1536	0.0037009	0.000582232	46.8055	52.4646					43.4	51.37		47.4	37.8	46.2	52	40.2	42.2	41.6	47	47.4	45.4	49	45.6	51.8	45.2	46.6	45.4		43.8	54.8	60.8	52.2	47.2	48	51.4	42.2	43.8		42.6	43.4	42.2	53
-1600	0.664576	0.0981798	0.904041	0.536218	-1600	0.00366902	0.000636234	46.7997	52.4729					44.2	52.591		48.8	36.6	45.6	49.8	41	41.8	41	47.2	44.6	47.2	49.2	46.8	49.4	45	46.4	44.6		42.8	55.4	62.2	50.4	48.4	48.2	51.4	41.6	45		41.4	43.6	43.8	54.8
-1664	0.719931	0.158596	0.94771	0.536334	-1664	0.00397463	0.00102775	46.8551	52.5333					44.2	53.307		49.2	36	44.6	47.8	42.2	41.8	40	47.8	43	49.2	48.4	48.2	48	44	46.8	44.4		41.8	56.2	62	47.4	51	48.8	51.6	40.8	46		41	44.8	46	56.2
-1728	0.585092	0.16693	0.961336	0.538313	-1728	0.0032302	0.00108175	46.7202	52.5417					43.8	53.327		49	36.2	43.2	45.4	44.2	42.4	39	47.4	42	50.6	47.4	49.4	46.8	43.2	47.2	44.4		42	56.2	61	45	53.8	48.2	51.2	40.2	44.8		41	46.2	47.8	56
-1792	0.379167	0.133596	0.98756	0.545779	-1792	0.00209332	0.000865745	46.5143	52.5083					43.2	53.629		47.8	37.4	41.4	43.6	46	43.2	38.4	46.6	42	50.8	45.6	50.8	47.2	42.2		45		42.8	55.6	59	42.6	56.2	48	50.6	40.2	42.2		41.8	47.6	49	55
-1856	0.146367	0	0.972733	0.547423	-1856	0.000808067	0	46.2815	52.3747					42.8	53.645		46.6	38.8	40.2	42.2	47.2	44.4	38.4	45.2	42.2	50.2	44	51.6	49.2	41.4		45.6		44.2	55.4	56.4	41.6	57.6	47.2	49.6	40.4	38.6		43.2	49	49	52.6
-1920	0	-0.115789	0.986498	0.553854	-1920	0	-0.00075035	46.1351	52.2589					42.8	54.254		46	40.4	39.6	41.8	47.8	45	38.8	43.4	42.2	48.8	43.8	51.8	51.6	40.8		46.8		45.4	54.4	54.4	40.8	58.6	46.6	48.6	41	34.8		45	49.6	49	50.2
-1984	-0.0065	-0.310221	0.985658	0.566044	-1984	-3.58855e-05	-0.00201032	46.1286	52.0645					43.6	55.059		46	41.6	39.2	41.6	48	45	40.2	42.4	42.4	47.4	43.6	51.6	54	40.6		47.6		45.8	53.8	52.4	41	58.4	46.8	47.8	42	32.8		46.6	50.2	48.6	47.8
-2048	-0.0193	-0.26936	0.971295	0.572768	-2048	-0.000106552	-0.00174554	46.1158	52.1054					45.2	55.075		47.4	42.2	39.4	42.4	48.6	44	41.2	41.6	42.6	46.2	43.8	50.8	55.8	40.6		48		45.4	53.2	51.4	41.6	57.8	47.2	46.8	42	32.2		47.2	50.2	48	45.6
-2112	-0.0189333	0.053524	0.922991	0.563784	-2112	-0.000104528	0.000346852	46.1162	52.4283					47	54.686		48.4	42.2	39.6	43.6	49.2	42.4	41.8	42.6	43.2	46	44.2	50.2	55.8	40.6		47.8		43.4	52.6	50.4	42.4	56.8	48.2	46	42	33.2		47.6	50.4	47.6	43.6
-2176	-0.0860667	0.318741	0.864252	0.570841	-2176	-0.000475161	0.00206554	46.0491	52.6935					48.8	53.472		49.4	41.4	40.4	44.8	50	41.2	41.8	44.2	43.6	46.4	44.4	49.2	54.8	41.2		47		40.4	51.4	49.4	43	55.2	49.4	46	41.4	34.8		48.2	50.4	47.4	42.4
-2240	-0.2198	0.568741	0.832365	0.575203	-2240	-0.00121348	0.00368561	45.9153	52.9435					49.6	51.06		49.4	41	41	46.2	51.2	39.4	41.2	46.6	44	47.8	43.8	48	52.6	41.8		46.4		38	50.6	48.8	42.8	54	51.2	46.2	40.8	36.6		48	50.4	47.2	41.8
-2304	-0.387433	0.764394	0.861015	0.584821	-2304	-0.00213896	0.0049535	45.7477	53.1391					49.6	48.631		49	40.4	42.2	47.6	52.4	37.8	40.2	48.8	44.8	49.6	42.8	47.4	49.4	42		45.2		36	50	48.4	42.4	53.4	53.8	47.2	39.4	38.6		47.6	49.6	46.8	41.4
-2368	-0.591167	0.656032	0.900642	0.576448	-2368	-0.00326374	0.00425128	45.544	53.0308					49.2	45.719		47.8	40.6	43	48.8	53	36.8	40	50.4	44.8	51	41.6	47.4	46.2	42.8		44.6		35.2	49.8	47.6	40.8	52.8	55.8	48	38.4	40.4		47.2	49	46.2	41.4
-2432	-0.667233	0.491197	0.947664	0.562539	-2432	-0.00368369	0.0031831	45.4679	52.8659					48.2	43.237		47.6	41.6	44	49.2	53.2	36.6	40	51.2	44.8	52	40.6	47.6	43	43.8		44.4		35.8	49.8	47.6	39	52.8	58	48	37.2	42.4		46.4	48.8	45.2	42
-2496	-0.8364	0.260428	0.942492	0.535887	-2496	-0.00461763	0.00168765	45.2987	52.6352					47.4	41.562		47.4	43	45.2	49.2	52.8	36.6	40.8	50.8	44.4	51.2	40.2	48	40	44.2		44.2		38.4	49.4	47.2	37.2	52.4	59	47.6	36.6	44		45.6	48.4	43.6	42.6
[truncated: 97 more columns]
