# Supplementary material for: Rapid binding to protofilament edge sites facilitates tip tracking of EB1 at growing microtubule plus-ends
Source: eLife. 2024 Feb 22;13:e91719. doi: 10.7554/eLife.91719 (PMC10883673; doi:10.7554/eLife.91719)
Supplement: Figure 2—source data 1. [file elife-91719-fig2-data1.xlsx]

## Sheet: Fig.2 C middle
	Average background subtracted	Average background subtracted	Average background subtracted	Average background subtracted	Average background subtracted	Average background subtracted	Average background subtracted	std error	std error	std error	std error	std error	std error	std error	std error	std error		average
position	Lattice On Rate 0.125x	Lattice On Rate 0.25x	Lattice On Rate 0.5x	Lattice On Rate 1x	Lattice On Rate 2x	Lattice On Rate 4x	Lattice On Rate 8x	position	Lattice On Rate 0.125x	Lattice On Rate 0.25x	Lattice On Rate 0.5x	Lattice On Rate 1x	Lattice On Rate 2x	Lattice On Rate 4x	Lattice On Rate 8x			position	Lattice On Rate 0.125x	Lattice On Rate 0.25x	Lattice On Rate 0.5x	Lattice On Rate 1x	Lattice On Rate 2x	Lattice On Rate 4x	Lattice On Rate 8x		position	Lattice On Rate 0.125x growth1	Lattice On Rate 0.125x growth2	Lattice On Rate 0.125x growth3	Lattice On Rate 0.125x growth4	Lattice On Rate 0.125x growth5	Lattice On Rate 0.125x growth6	Lattice On Rate 0.125x growth7	Lattice On Rate 0.125x growth8	Lattice On Rate 0.125x growth9	Lattice On Rate 0.125x growth10	Lattice On Rate 0.25x growth 1	Lattice On Rate 0.25x growth 2	Lattice On Rate 0.25x growth 3	Lattice On Rate 0.25x growth 4	Lattice On Rate 0.25x growth 5	Lattice On Rate 0.25x growth 6	Lattice On Rate 0.25x growth 7	Lattice On Rate 0.5x growth 1	Lattice On Rate 0.5x growth 2	Lattice On Rate 0.5x growth 3	Lattice On Rate 0.5x growth 4	Lattice On Rate 1x growth 1
2496	0.478889	-0.264286	12.15	3.51667	14.2	59.4	36.9667	2496	1.52325	2.58595	6.38646	4.48254	7.2145	5.58614	25.2353			2496	52.6389	52.6857	60.75	56.45	63.8	102.7	74.4167		2496	55.8	57.5	53	45.45	43.8	54.75	56.6		54.65	52.2	58.8	50	62.6	39.6	55.6	51	51.2	75	56.8	69.4	41.8	49.8
2432	0.195	0	13.2	4.48333	16.1286	60.1	39.0333	2432	1.55421	2.45563	6.75389	5.01301	7.11689	4.10122	24.5836			2432	52.355	52.95	61.8	57.4167	65.7286	103.4	76.4833		2432	56.2	58	51.4	45.75	45.2	54.1	58.8	45.55	54.95	53.6	58.6	51.1	62.95	40.6	54	53	50.4	78.2	55.4	70.4	43.2	49.8
2368	0.805	0.485714	13.85	5.9	18.1571	61.6	42.7333	2368	1.51855	2.42564	6.93952	5.51516	6.97628	3.3234	23.7826			2368	52.965	53.4357	62.45	58.8333	67.7571	104.9	80.1833		2368	56.4	58.5	50.6	46.9	47.6	53.7	60.2	45.55	55.2	55	58.8	52.3	63.55	41.6	52.2	55.4	50.2	81	53.8	69.8	45.2	51.2
2304	1.695	1.41429	14.5	7.66667	20.3714	42.7667	35.5375	2304	1.38839	2.43538	6.94064	5.91552	6.74845	16.9471	20.112			2304	53.855	54.3643	63.1	60.6	69.9714	86.0667	72.9875		2304	57	58.7	50.2	48.8	51.4	53.5	60.8	46.3	55.45	56.4	59.6	53.45	64.5	43	51.2	57.6	51.2	83	53	68.8	47.6	54
2240	2.75	2.80714	15.05	9.55	22.4429	32.15	41.1125	2240	1.22855	2.5951	6.86308	6.08643	6.56596	16.621	19.9304			2240	54.91	55.7571	63.65	62.4833	72.0429	75.45	78.5625		2240	57.6	59.5	51	51.15	54.8	53.65	60.4	47.6	55.8	57.6	62.4	54.25	65.45	43.8	51.8	60.2	52.4	84.4	52.4	67.6	50.2	57.8
2176	3.62	4.05714	15.1	11.9	24.8	32.65	47.5	2176	0.993131	2.63919	6.60663	6.14748	6.42778	16.9683	19.6381			2176	55.78	57.0071	63.7	64.8333	74.4	75.95	84.95		2176	58	59.3	52.4	54.3	58.2	53.85	58.2	49.05	56.1	58.4	64.4	55	66.05	44.6	53	61.8	54.2	84.4	52.4	66	52	62.6
2112	4.165	4.89286	15.05	14.5	26.9143	33.15	54	2112	0.895272	2.6938	6.12918	5.91104	6.47303	17.223	19.5056			2112	56.325	57.8429	63.65	67.4333	76.5143	76.45	91.45		2112	58.4	58.2	54.6	57.65	60.4	54.25	54.8	50.15	56	58.8	66	55.95	66.15	44.8	54	62.8	55.2	83.4	53	64.4	53.8	67.2
2048	4.25	5.45	14.95	17.2	28.8143	33.4	59.3875	2048	1.08491	2.6041	5.63355	5.58006	6.59723	17.59	19.5173			2048	56.41	58.4	63.55	70.1333	78.4143	76.7	96.8375		2048	58.2	55.7	56.6	60.5	61.6	54.8	51.2	50.75	55.55	59.2	66.8	56.75	66.05	45.8	55	63	55.4	82.2	53.6	62.6	55.8	71.4
1984	4.055	5.53571	14.65	19.5833	30.4857	33.55	63.65	1984	1.41655	2.43735	4.78141	5.09828	6.75578	18.0248	19.595			1984	56.215	58.4857	63.25	72.5167	80.0857	76.85	101.1		1984	58	52.2	58	62.6	62.2	55.4	48.6	50.8	54.75	59.6	66.2	57.65	65.75	46.8	55	62.8	55.2	79.4	54.8	60.8	58	74
1920	3.48	5.77857	14.25	21.35	31.8286	33.9	67	1920	1.71956	2.18405	3.97893	4.59132	6.71634	18.1847	19.6687			1920	55.64	58.7286	62.85	74.2833	81.4286	77.2	104.45		1920	56.4	49	59	63.95	62.2	56.05	47	50.1	53.1	59.6	65	58.7	65.6	48.6	55	63	55.2	76.2	55.2	59.6	60.4	75.6
1856	2.5	6.1	13.75	22.5167	33.1286	34.55	69.5875	1856	1.90131	1.93499	3.13159	3.85413	6.2956	17.9515	19.388			1856	54.66	59.05	62.35	75.45	82.7286	77.85	107.037		1856	54	46.6	58.8	64.3	61.8	56.35	46.2	49.2	50.75	58.6	64	59.6	65.75	50.8	54.2	62.8	56.2	72.6	56	59	61.8	76.4
1792	1.595	6.75	13.35	23.45	34.6143	35.85	71.825	1792	1.87245	1.80303	2.35306	3.2087	5.47605	16.9655	18.6535			1792	53.755	59.7	61.95	76.3833	84.2143	79.15	109.275		1792	51.6	45.7	58.4	63.3	60.8	56.25	47.2	48.45	48.45	57.4	63.6	60.35	65.95	53	53.2	63.6	58.2	69	56.6	59	63.2	76.8
1728	0.81	7.7	12.95	24.5167	36.4429	37.95	74.1125	1728	1.69881	1.82854	1.64526	2.6004	4.52078	15.4344	16.9772			1728	52.97	60.65	61.55	77.45	86.0429	81.25	111.562		1728	49.4	46.4	57.8	60.85	59.6	56.3	48.8	47.9	46.65	56	63.6	60.65	66.5	54.6	52.8	65.4	61	65.6	57.4	59.4	63.8	77.8
1664	0.285	8.77857	12.7	25.6333	38.5571	40.95	77.075	1664	1.44626	2.00015	0.87892	2.16752	3.77564	13.3008	14.3797			1664	52.445	61.7286	61.3	78.5667	88.1571	84.25	114.525		1664	48.4	47.8	57.6	57.6	57.8	56.35	51	48.05	45.45	54.4	64.4	60.65	67.25	55.8	52.6	67.6	63.8	62.8	59	60.2	63.2	78.4
1600	-0.015	9.75714	12.15	26.6167	40.9571	45.15	80.65	1600	1.18018	2.18423	0.465698	1.91569	3.47996	11.05	11.0115			1600	52.145	62.7071	60.75	79.55	90.5571	88.45	118.1		1600	49.2	49.6	57.6	54.1	55.4	56.2	52.6	48.75	45	53	66	60.7	67.85	56.2	53	69.6	65.6	60.6	59.6	60.6	62.2	78.8
1536	0.055	10.6571	11.45	27.2833	43.3429	49.75	84.825	1536	1.07891	2.42176	0.454835	1.74617	3.38344	8.8296	7.458			1536	52.215	63.6071	60.05	80.2167	92.9429	93.05	122.275		1536	51	51.5	58.2	50.85	53.4	56.1	54	49.55	45.15	52.4	68	60.65	68.4	56.2	53.4	71.8	66.8	58.6	60	60.6	61	79
1472	0.345	11.1	10.3	27.2833	45.4143	54.4	88.8875	1472	1.12511	2.53512	0.576628	1.75506	3.33396	6.95503	4.34689			1472	52.505	64.05	58.9	80.2167	95.0143	97.7	126.337		1472	53.8	52.6	58.8	48.75	51.6	55.75	54.6	50.3	45.45	53.4	69.2	60.05	68.9	56.2	54.2	73.2	66.6	57	60	59.6	59	78.8
1408	0.84	11.1857	9.2	26.4833	47.0429	59	92.425	1408	1.24282	2.70745	0.604152	1.85419	3.18401	5.8213	2.57812			1408	53	64.1357	57.8	79.4167	96.6429	102.3	129.875		1408	56.8	53.4	59.4	47.9	50.8	55.5	55	51	45.8	54.4	70.4	59.05	69.1	54.8	55.2	74	66.4	56	59.4	58	57.8	78.8
1344	1.235	10.7714	8.45	25.75	48.2143	63.25	95.3375	1344	1.26154	2.78282	0.668487	1.95056	3.07196	5.24279	3.01229			1344	53.395	63.7214	57.05	78.6833	97.8143	106.55	132.787		1344	58.8	53.4	59	48.15	51.4	55.65	54.6	51.4	46.15	55.4	70.2	57.8	68.85	53.4	56	74	65.8	55.6	59.2	57	56.4	79.8
1280	1.92	10.2143	8.6	25.2833	49.2286	67.05	96.925	1280	1.27354	2.77736	0.514782	2.12922	3.05606	4.9236	4.35063			1280	54.08	63.1643	57.2	78.2167	98.8286	110.35	134.375		1280	60.4	53.3	59	49.35	53.2	56.15	54.8	51.4	46.6	56.6	69.8	56.55	68.4	52.6	56.2	73	65.6	56.4	58.8	57.4	56.2	82.4
1216	2.57	9.34286	9.35	25.5833	50.1286	70.35	97.675	1216	1.22183	2.65427	0.562917	2.484	2.99964	4.6002	5.38254			1216	54.73	62.2929	57.95	78.5167	99.7286	113.65	135.125		1216	61.2	52.6	57.8	51.25	56	57	55	51.15	47.5	57.8	68.2	55.95	68.1	52	55.8	71.4	64.6	57.8	58.6	59.2	56.2	86.6
1152	3.145	8.47857	10.6	26.5333	50.9	73.1	97.775	1152	1.21022	2.5294	1.07471	2.96532	2.98493	4.13038	6.18793			1152	55.305	61.4286	59.2	79.4667	100.5	116.4	135.225		1152	61.2	51.9	56.4	53.4	58.6	57.7	55.8	50.55	48.7	58.8	67	56.3	67.7	51.2	54.8	69.4	63.6	60.2	58.4	62	56.2	91
1088	3.61	7.61429	12.3	27.9333	51.6429	75.45	97.7625	1088	1.27055	2.38457	1.58193	3.40479	2.7525	3.68875	6.57468			1088	55.77	60.5643	60.9	80.8667	101.243	118.75	135.213		1088	61	50.9	55.6	55.25	60.2	57.85	57.2	49.75	50.15	59.8	65.6	57.65	67.3	50.6	53.4	67.4	62	63	59	64.8	56.8	95
1024	3.83	7.06429	14	29.2167	52.1714	77.4	97.4	1024	1.28718	2.31432	2.27266	3.84287	2.5235	3.52527	6.4778			1024	55.99	60.0143	62.6	82.15	101.771	120.7	134.85		1024	60.2	50.8	54.4	56.55	61.4	57	58.8	48.95	52	59.8	65.2	59.9	66.8	50	52.4	65.6	60.2	67	59	67.2	57.2	97.6
960	3.885	7.08571	15.55	30.4	52.3429	79.4	97.3875	960	1.26709	2.24646	2.80569	3.91341	2.20629	3.78847	6.07864			960	56.045	60.0357	64.15	83.3333	101.943	122.7	134.838		960	59	51.2	54	57.6	61.2	54.75	60.6	48.4	54.3	59.4	65	62.75	66.1	49.8	53	64.8	58.8	70.8	59	68.6	58.2	98.4
896	3.945	7.5	17.3	31.3167	52.5714	81.05	98.175	896	1.30097	2.24029	3.32378	3.81006	2.03216	4.31704	5.50822			896	56.105	60.45	65.9	84.25	102.171	124.35	135.625		896	57.6	52	55	58.25	61	51.9	62.2	48.3	56.6	58.2	65	65.75	65.2	49.6	54.8	64.8	58	75.2	59.6	69.2	59.6	98
832	3.855	8.41429	19.15	31.9833	52.8286	82.15	100.013	832	1.44276	2.19058	3.72584	3.53557	2.11879	4.90019	4.75662			832	56.015	61.3643	67.75	84.9167	102.429	125.45	137.463		832	55.8	52.3	56.4	58.8	61.4	49.45	63.2	48.45	58.35	56	64.6	68.75	64.2	50.4	57.2	65.6	58.8	79.6	61	68.6	61.8	96.2
768	3.965	9.79286	21.45	32.6333	53.6429	83.5	102.937	768	1.63461	2.22069	4.0604	3.10105	2.58077	5.505	4.43214			768	56.125	62.7429	70.05	85.5667	103.243	126.8	140.387		768	55.4	52.2	58	59.4	62.4	47.7	63.8	48.8	59.35	54.2	64.4	71.45	63.55	51.2	60	67.2	61.4	83.8	63.6	68.2	64.6	94.8
704	4.515	11.5571	24.05	33.8167	55.2857	84.55	107.15	704	1.88143	2.24055	4.25815	2.6789	3.09868	5.80791	4.33532			704	56.675	64.5071	72.65	86.75	104.886	127.85	144.6		704	56.2	52.4	60.2	59.9	65.2	47.05	64.8	49.5	59.5	52	64.4	73.35	63.4	53	62.2	69.8	65.4	87.4	67.6	67.8	67.8	95.2
640	5.715	13.8571	27.05	35.8667	57.9857	86.95	112.525	640	2.11033	2.3146	4.32919	2.42201	3.55622	5.72118	4.42752			640	57.875	66.8071	75.65	88.8	107.586	130.25	149.975		640	59.2	53.2	62.6	60.25	68.2	47.95	66.8	50.35	59.4	50.8	65.8	74.9	64.15	56.2	62.4	72.8	71.4	90.4	72.8	68.4	71	97.8
576	8.085	17.2286	30.55	39.15	61.9857	90.95	118.775	576	2.46536	2.5727	4.37457	2.41113	3.81225	5.09479	4.60603			576	60.245	70.1786	79.15	92.0833	111.586	134.25	156.225		576	64.6	55.2	65.8	60.2	73.2	50.3	70.4	51.9	60.25	50.6	68.2	77.05	66.4	61	62.8	77.2	78.6	93.2	79.4	70.2	73.8	102.2
512	12.5	22.4857	35.7	44.45	68.1429	96.8	125.612	512	2.9473	2.95529	4.64624	2.6502	3.87614	4.05802	4.75162			512	64.66	75.4357	84.3	97.3833	117.743	140.1	163.062		512	73.2	59.6	71.4	60.1	79.6	54.35	76.6	55.15	63.8	52.8	72.2	81.05	71.2	68.8	64.4	82.8	87.6	97.6	88.4	75.2	76	109.2
448	19.68	30.8857	43.5	52.5	76.6	105.3	132.85	448	3.62065	3.29416	5.53421	3.11784	3.7569	2.96057	4.7162			448	71.84	83.8357	92.1	105.433	126.2	148.6	170.3		448	85.8	66	79.2	61.85	88.2	61.15	86.4	60.9	71.7	57.2	79.8	88.55	79.1	80.2	70.2	89.8	99.2	105.2	100.8	82.8	79.6	119.2
384	30.71	43.3786	55.2	63.7667	88.5714	115.65	140.637	384	4.29121	3.29616	6.9199	3.6174	3.61238	2.1417	4.24037			384	82.87	96.3286	103.8	116.7	138.171	158.95	178.087		384	101.6	75.6	90.6	67.9	99.6	71.35	100.6	70.25	84.6	66.6	91.8	100.45	90.45	96.6	82.6	100	112.4	117.6	117	94.6	86	131.8
320	46.465	60.6643	71.8	79.05	104.029	128	149.05	320	5.00761	3.04666	8.74214	4.07611	3.40046	1.73277	3.36935			320	98.625	113.614	120.4	131.983	153.629	171.3	186.5		320	122.6	88.8	106.2	79.85	115.4	85.15	119.8	83.95	102.7	81.8	110.8	117.45	106.05	117.4	102.6	112	129	136.6	138	109.8	97.2	147.4
256	66.725	82.6	92.9	97.7167	122.7	141.8	158.15	256	5.58422	2.99096	10.1446	4.58729	3.07717	1.88878	2.20454			256	118.885	135.55	141.5	150.65	172.3	185.1	195.6		256	147	106	127	98.95	135.6	102.75	142.8	101.8	124.35	102.6	136.4	139.25	125.8	142.8	128.4	127.8	148.4	159.8	162.4	129.2	114.6	167.6
192	89.615	106.864	116.35	118.567	143.014	156.75	168.137	192	5.82392	3.49509	10.9486	4.72082	2.55873	1.78938	1.28311			192	141.775	159.814	164.95	171.5	192.614	200.05	205.588		192	172.2	126.1	150.8	124.45	158.6	123.1	166.4	122.6	146.3	127.2	165.4	163.9	148.4	170	157.2	144.8	169	184.6	187.8	151	136.4	189.2
128	111.275	129.75	138.85	138.717	161.686	170.2	177.675	128	5.72707	4.48898	10.8258	4.5332	1.84539	1.63783	1.24065			128	163.435	182.7	187.45	191.65	211.286	213.5	215.125		128	193.4	146.1	173.4	151.8	180	143.35	187.6	143	165.1	150.6	193.6	187.35	170.35	195.2	184	160.2	188.2	206.8	210.4	172.6	160	210.2
64	127.08	146.057	155.7	154.167	174.771	180.95	185.538	64	5.33284	5.53457	9.83069	4.03065	0.974305	0.83479	1.48454			64	179.24	199.007	204.3	207.1	224.371	224.25	222.988		64	205.4	161.9	189	174.1	195.8	159.15	202.4	158.95	176.7	169	215	203.8	186.05	213.2	202.4	170.2	202.4	221.8	225.6	189	180.8	225.2
0	132.795	152.086	162.5	160.883	178.457	185.85	188.8	0	4.80275	6.45871	7.98013	3.47726	0.539787	0.248747	1.23161			0	184.955	205.036	211.1	213.817	228.057	229.15	226.25		0	206.6	168.4	193.4	184.7	200.2	165.75	206.8	166.8	178.5	178.4	226.4	208.25	190.6	220.2	207.8	171.8	210.2	225.2	228.6	198	192.6	230.8
-64	126.77	145.657	156.5	156.55	170.671	182.45	184.762	-64	4.10641	7.04187	5.88579	3.2796	1.41403	1.23364	1.34355			-64	178.93	198.607	205.1	209.483	220.271	225.75	222.213		-64	196	165.2	185.6	179.75	191.4	161.05	198.6	164.05	170.25	177.4	223.6	198.5	181.75	214.6	197.4	164.8	209.6	214.8	218.6	195.6	191.4	225.6
-128	110.305	128.243	138.35	141.117	151.743	169.6	172.15	-128	3.41646	7.49702	4.04992	3.83882	2.36228	1.43091	2.90431			-128	162.465	181.193	186.95	194.05	201.343	212.9	209.6		-128	177.4	152.1	167	161.05	170.2	146.3	179	151.1	153.9	166.6	207.4	176.55	161.2	197.8	175.2	150	200.2	192.2	197	182.2	176.4	211.8
-192	87.38	103.85	111.55	117.6	124.786	148.35	150.387	-192	2.86503	7.73184	2.67056	4.82808	3.17326	1.1322	4.86889			-192	139.54	156.8	160.15	170.533	174.386	191.65	187.838		-192	154.2	133.5	143	134.7	142.2	125.3	150.6	130.75	132.75	148.4	181.2	148.05	134.35	173.2	145.8	131.4	183.6	162	167	159.4	152.2	191.2
-256	62.62	77.1429	81.35	90.6167	94.5286	121.3	122.1	-256	2.64316	7.48681	2.2264	5.85082	3.59323	2.00125	6.34128			-256	114.78	130.093	129.95	143.55	144.129	164.6	159.55		-256	130.4	112.1	117.2	107.5	113.2	102.85	120.2	107.3	110.45	126.6	149.4	119.05	107.8	144.8	116	111.8	161.8	128.6	135.2	132.6	123.4	167.4
-320	40.495	52.7	53.5	64.8167	65.6	92.05	91.75	-320	2.5723	6.63858	1.99311	6.26107	3.59274	3.95055	6.94586			-320	92.655	105.65	102.1	117.75	115.2	135.35	129.2		-320	109.2	92.4	95	85.1	88.4	83.1	92.4	85.35	90.4	105.2	118.6	94.2	85.95	118.2	91.8	93.8	137	99.2	106.6	105.4	97.2	143.2
-384	23.185	32.8786	31.05	43.4167	41.2857	64.9	63	-384	2.45706	5.39009	1.67089	5.89613	3.21555	5.58614	6.60506			-384	75.345	85.8286	79.65	96.35	90.8857	108.2	100.45		-384	91.8	75.7	78	69.45	70	67.8	71.4	67.7	74.8	86.8	92.4	76.05	69.95	96	74.4	78.8	113.2	76.4	84	81.8	76.4	120.8
-448	11.39	18.7786	15.4	27.0333	23.0143	42	39.2625	-448	2.36252	4.09442	1.47817	4.91735	2.61631	6.33778	5.60798			-448	63.55	71.7286	64	79.9667	72.6143	85.3	76.7125		-448	79.4	63.3	66.4	59.45	59	56.7	57.8	55.1	64.35	74	73.4	64.45	59.25	79.8	64	67.8	93.4	61.2	68.4	65	61.4	100.8
-512	4.4	9.91429	5.95	15.9333	10.8	24.9	21.375	-512	2.22504	3.15971	1.28914	3.76694	2.05208	6.18345	4.23975			-512	56.56	62.8643	54.55	68.8667	60.4	68.2	58.825		-512	70.8	54.9	60.4	53.55	53.8	49.4	50.8	47.55	58.4	66	62.2	57.75	52.5	69.6	58	60.4	79.6	53	59	53.4	52.8	85.4
-576	0.76	4.62857	1.1	9.13333	3.64286	13.5	10.0125	-576	2.0108	2.41589	1.05	2.86382	1.89067	5.37634	3.00569			-576	52.92	57.5786	49.7	62.0667	53.2429	56.8	47.4625		-576	64.4	50.5	58.4	50.3	52	45.05	49	43.7	55.05	60.8	55.8	54.5	48.55	63.6	54.4	56.6	69.6	50	53	47.6	48.2	75
-640	-0.84	1.76429	-1	5.06667	0.257143	6.65	3.5	-640	1.84937	1.96317	1.12472	2.41672	1.9284	4.31357	2.15334			-640	51.32	54.7143	47.6	58	49.8571	49.95	40.95		-640	60	48.4	57.6	48.3	52.8	43.3	49.8	41.9	52.7	58.4	53.2	53.5	46.3	59.8	52.4	54	63.8	50.4	49	44.6	46.4	68.8
-704	-1.245	0.1	-1.5	2.63333	-0.771429	2.85	0.5625	-704	1.73403	1.71235	1.64393	2.2825	1.87559	3.31992	1.77802			-704	50.915	53.05	47.1	55.5667	48.8286	46.15	38.0125		-704	57.2	47.9	57.8	47.15	53.8	43.55	52.2	41.6	50.75	57.2	52	53.7	45.05	56.8	50.4	52.8	60.6	52.4	46	43.4	46.6	65
-768	-1.19	-0.678571	-1.15	1.33333	-0.5	1.45	-0.4625	-768	1.58444	1.57253	2.12058	2.16419	1.79739	2.69014	1.62869			-768	50.97	52.2714	47.45	54.2667	49.1	44.75	36.9875		-768	54.8	48.1	57.6	46.9	55.2	45.35	54.6	42.3	48.85	56	52.2	54.55	44.55	54.2	48.8	53	58.6	54	43.8	43.6	48.4	62.8
-832	-0.955	-1.16429	-1.15	0.416667	0.357143	0.85	-0.75	-832	1.47079	1.46892	2.45802	2.15687	1.64724	2.37632	1.8715			-832	51.205	51.7857	47.45	53.35	49.9571	44.15	36.7		-832	53	48.1	57	47.2	56.8	48.5	56	43.45	47	55	51.8	55.5	45	51.6	48.2	53	57.4	54.6	41.8	44.2	49.2	61.2
-896	-0.42	-1.16429	-1.15	-0.0166667	1.47143	0.9	-0.4	-896	1.45286	1.32097	2.58687	1.97068	1.516	1.98368	2.16492			-896	51.74	51.7857	47.45	52.9167	51.0714	44.2	37.05		-896	52	48.3	56.2	48.15	58.4	52.6	57	44.75	45.6	54.4	52.2	56.15	46.75	49.6	48.2	53.2	56.4	54.2	40.6	44.8	50.2	59
-960	0	-0.857143	-1.05	-0.15	2.22857	1.15	0	-960	1.53201	1.18565	2.35942	1.89186	1.40534	1.69466	2.55869			-960	52.16	52.0929	47.55	52.7833	51.8286	44.45	37.45		-960	50.4	48.2	55.2	49.3	60.2	56.7	56.8	45.9	45.1	53.8	53	56.25	49	48.2	49	53.2	56	53.2	40.6	46.2	50.2	57.2
-1024	0.215	-0.542857	-0.8	0	2.72857	1.35	0.3	-1024	1.71265	1.07932	2.06155	2.00522	1.43381	1.3122	2.82611			-1024	52.375	52.4071	47.8	52.9333	52.3286	44.65	37.75		-1024	49	47.6	54.2	50.1	62	59.75	56.6	46.3	45.4	52.8	53.6	55.6	51.25	47.2	50.2	53.2	55.8	52.4	41.2	48	49.6	55.4
-1088	0.215	-0.414286	-0.25	0.3	2.58571	1.5	0.7125	-1088	1.85014	1.01814	1.88597	2.24755	1.50894	0.948683	3.03847			-1088	52.375	52.5357	48.35	53.2333	52.1857	44.8	38.1625		-1088	47.6	47.3	53.6	50.3	62.6	61.75	56.4	45.65	46.55	52	53.8	53.95	53.4	46.6	51.8	52.4	55.8	52.6	42.4	50.2	48.2	54.6
-1152	-0.185	-0.107143	0.9	0.616667	2.05714	1.2	0.5125	-1152	1.87461	1.15879	2.10297	2.50752	1.78735	0.722842	2.99851			-1152	51.975	52.8429	49.5	53.55	51.6571	44.5	37.9625		-1152	46.6	46.6	53.4	50.1	62.2	62.1	55	44.35	48.4	51	54.6	51.7	55	46.4	54.4	51.6	56.2	54.2	43.8	52.8	47.2	54.6
-1216	-0.445	-0.0428571	1.8	0.816667	1.35714	1.05	-0.0125	-1216	1.84295	1.44922	2.4259	2.61106	1.99896	0.849632	3.0228			-1216	51.715	52.9071	50.4	53.75	50.9571	44.35	37.4375		-1216	46	46.6	54	49.55	61.8	60.95	53.8	42.9	50.55	51	54.8	49.05	56.3	46	56.8	51.6	55.8	56.2	45.6	54.2	45.6	55.4
-1280	-0.69	0	2.7	0.616667	0.585714	0.65	-0.55	-1280	1.73934	1.77209	2.81469	2.59463	2.26134	1.0497	2.88314			-1280	51.47	52.95	51.3	53.55	50.1857	43.95	36.9		-1280	46.8	46.3	54.6	48.85	60.6	59.15	52.6	41.85	52.55	51.4	54.4	46.55	57.7	46.2	59.2	52	54.6	58	47	55.6	44.6	55.6
-1344	-0.65	0.107143	2.95	0.383333	-0.214286	0	-0.9625	-1344	1.58823	1.96044	3.13159	2.39541	2.47456	1.70367	2.75013			-1344	51.51	53.0571	51.55	53.3167	49.3857	43.3	36.4875		-1344	48.8	46.4	55	48.7	59.6	56.8	51.8	41.6	54	52.4	54.2	44.85	58.95	47	60	53.2	53.2	59.6	47.4	55.4	43.8	55.8
-1408	-0.425	0.128571	2.75	-0.05	-0.828571	-0.85	-1.125	-1408	1.40305	2.1096	3.46076	2.15901	2.58739	2.08252	2.69615			-1408	51.735	53.0786	51.35	52.8833	48.7714	42.45	36.325		-1408	50.8	47.2	55.4	49.15	58.4	54.95	51.2	42.3	54.75	53.2	53.4	44.05	60.1	48	60.6	54.2	51.2	60.6	47.6	54.8	42.4	55.4
-1472	0.005	0.25	2.6	-0.316667	-1.2	-2	-0.9125	-1472	1.199	2.14457	3.5798	1.94314	2.4885	2.22767	2.67847			-1472	52.165	53.2	51.2	52.6167	48.4	41.3	36.5375		-1472	53.6	48.4	54.4	50.15	57.6	54	51	43.6	54.9	54	53.4	44.2	60.8	48.6	60.2	55.4	49.8	61.6	48.2	53	42	54.8
-1536	0.555	0.457143	2.2	-0.566667	-1.08571	-3.25	-0.2625	-1536	1.03646	2.02556	3.51852	1.80934	2.16724	2.32849	2.58266			-1536	52.715	53.4071	50.8	52.3667	48.5143	40.05	37.1875		-1536	55.6	50.1	53.2	51.6	57	53.75	52.4	44.65	54.85	54	53	45.4	60.65	49.8	60.2	55.8	49	61.6	48.8	50.8	42	54
-1600	0.98	0.428571	1.85	-0.75	-0.714286	-4.55	0.525	-1600	0.991408	1.77424	3.34841	1.99143	1.69687	2.16492	2.44294			-1600	53.14	53.3786	50.45	52.1833	48.8857	38.75	37.975		-1600	56.8	51.1	51.8	53.15	56	54.2	54.4	45.1	54.65	54.2	52.2	47.75	59.7	49.8	59.6	56	48.6	61.2	49.4	48.4	42.8	53
-1664	1.47889	0.135714	1.55	-0.8	-0.357143	-5.4	1.0625	-1664	1.19608	1.31563	3.14434	2.30334	1.26779	1.88878	2.21517			-1664	53.6389	53.0857	50.15	52.1333	49.2429	37.9	38.5125		-1664	58		50.6	54.5	54.8	54.6	57.2	45.2	54.45	53.4	51.2	50.45	58.15	50.4	57.4	55.2	48.8	60.4	49.6	47	43.6	52
-1728	1.57889	-0.0857143	1.25	-0.716667	0	-5.9	1.5	-1728	1.37272	1.00726	2.91408	2.51423	0.957249	1.44741	1.79356			-1728	53.7389	52.8643	49.85	52.2167	49.6	37.4	38.95		-1728	58.2		50	55.4	53	54.25	60	45.05	54.35	53.4	49.6	53.2	56.65	51.2	55.6	54.4	49.4	59.2	50.2	45.8	44.2	51.4
-1792	1.39	-0.221429	0.55	-0.716667	0.157143	-5.8	1.3875	-1792	1.58745	0.980101	2.50037	2.60004	0.99711	1.02103	1.30424			-1792	53.55	52.7286	49.15	52.2167	49.7571	37.5	38.8375		-1792	58.4		50.2	55.9	50.4	53.15	62.4	44.9	53.8	52.8	47.8	55.55	55.75	52.2	53	54	50.8	57.2	49.4	45.6	44.4	50.6
-1856	1.04	-0.121429	0	-0.3	0.0428571	-5.4	1	-1856	1.7214	1.26438	2.06155	2.57182	1.20642	0.698212	0.858414			-1856	53.2	52.8286	48.6	52.6333	49.6429	37.9	38.45		-1856	58.2		50.8	56	48.2	51.3	63.8	45.5	52.8	52.2	46.4	57.1	56.3	53	50.8	54.2	52	55.2	48.8	46	44.4	50.4
-1920	0.578889	0.242857	-0.8	-0.116667	-0.457143	-4.8	0.275	-1920	1.72616	1.59016	1.86414	2.57514	1.51709	0.460977	0.734315			-1920	52.7389	53.1929	47.8	52.8167	49.1429	38.5	37.725		-1920	57.2		52.8	55.65	46.6	49.3	63.8	46.7	51.8	50.8	45.8	57.8	58.15	52.4	49	55.4	53.8	53.6	47.4	47	43.2	50
-1984	0.0955556	0.964286	-1.15	0.15	-0.885714	-3.95	-0.7	-1984	1.67135	1.92138	1.78798	2.67669	1.80797	0.449305	1.00592			-1984	52.2556	53.9143	47.45	53.0833	48.7143	39.35	36.75		-1984	56		54.6	54.7	46.2	48.05	63	48	50.75	49	46	57.65	60.55	51.2	48.2	58	55.8	52.6	46	48.4	42.8	49.8
-2048	-0.404444	1.62857	-1.45	0	-1.27143	-2.8	-1.1125	-2048	1.59893	2.29195	2.03147	2.72108	2.1634	0.287228	1.22594			-2048	51.7556	54.5786	47.15	52.9333	48.3286	40.5	36.3375		-2048	55		55.8	53.5	46.4	48	61.6	49.1	49.8	46.6	46.8	57	62.65	48.8	48.2	61.2	57.4	52.6	44.2	49.4	42.4	49.6
-2112	-0.648889	0.591667	-1.1	-0.0666667	-1.65714	-1.75	-1.275	-2112	1.45491	2.76366	2.5025	2.67827	2.24089	0.248747	1.41703			-2112	51.5111	53.5417	47.5	52.8667	47.9429	41.55	36.175		-2112	54.4		56.2	52.25	47.6	49.55	60	49.55	48.65	45.4	48	56.25		45.6	48.6	65	57.8	53.6	43.4	51.2	41.8	49.6
-2176	-0.704444	0.766667	-0.5	-0.65	-1.78571	-1.25	-1.0125	-2176	1.4688	3.12218	2.89266	2.38402	2.15789	0.389711	1.47218			-2176	51.4556	53.7167	48.1	52.2833	47.8143	42.05	36.4375		-2176	54.6		56.6	51	48.6	52.1	59.2	49.05	47.35	44.6	49.8	55.7		43.2	48.8	67.2	57.6	55.2	42.4	52.4	42.4	49.6
-2240	-0.671111	0.683333	0.45	-1.08333	-1.62857	-1.05	-0.425	-2240	1.63984	3.30065	3.07439	2.14162	2.04248	0.540255	1.21777			-2240	51.4889	53.6333	49.05	51.85	47.9714	42.25	37.025		-2240	54.6		57.6	50.15	48.6	54.65	59.2	48	46.4	44.2	51	55.4		41.4	49.8	68.2	56	56.6	42.6	53.6	43.4	50.4
-2304	-0.41	0.358333	1.15	-0.253333	-1.4	-1.15	0.175	-2304	1.78702	3.22332	2.99113	1.81161	1.85164	0.759523	0.909928			-2304	51.75	53.3083	49.75	52.68	48.2	42.15	37.625		-2304	54.4		59	49.5	48.6	56.05	60	46.7	45.9	45.6	51.8	55.45		41	50	67.6	54	56.8	42.6	54.4	45.2	51.4
-2368	-0.304444	0.0833333	1.75	-0.993333	-0.6	-1.75	0.625	-2368	1.95	2.95162	2.82434	1.83948	1.72662	0.903811	0.564994			-2368	51.8556	53.0333	50.35	51.94	49	41.55	38.075		-2368	53.8		60.6	48.9	48	56.2	61	45.3	46.1	46.8	52	55.8		41.6	50.8	66	52	56.6	42.6	54.8	47.4	52.2
-2432	-0.115556	1.84	1.85	-1.63333	0.357143	-2.1	0.875	-2432	2.0962	2.29384	2.50237	2.02504	1.75218	1.03199	0.285865			-2432	52.0444	54.79	50.45	51.3	49.9571	41.2	38.325		-2432	53.4		62.2	48.3	47.6	55.35	62.2	44.15	46.8	48.4	52.4	56.15			51	64.2	50.2	55.4	42.8	54.4	49.2	53
-2496	-0.265556	1.82	1.9	-1.93333	1.22857	-2.35	0.416667	-2496	2.21027	2.18612	2.16852	2.30547	1.71687	0.998436	0.237268			-2496	51.8944	54.77	50.5	51	50.8286	40.95	37.8667		-2496	52.2		62.6	47.6	47	53.85	63.4	42.95	47.65	49.8	53.8	56.45			51.4	63.2	49	54.4	43.4	53.6	50.6	54.2
[truncated: 20 more columns]

## Sheet: Fig. 2 C right 
	Average	Average	Average	Average	Average	Average	Average		std error	std error	std error	std error	std error	std error	std error				Lattice On Rate 0.125x	Lattice On Rate 0.25x	Lattice On Rate 0.5x	Lattice On Rate 1x	Lattice On Rate 2x	Lattice On Rate 4x	Lattice On Rate 8x			On Rate	Tip/Lattice Intensity	Error						Individual Growth Events
position	Lattice On Rate 0.125x	Lattice On Rate 0.25x	Lattice On Rate 0.5x	Lattice On Rate 1x	Lattice On Rate 2x	Lattice On Rate 4x	Lattice On Rate 8x	position	Lattice On Rate 0.125x	Lattice On Rate 0.25x	Lattice On Rate 0.5x	Lattice On Rate 1x	Lattice On Rate 2x	Lattice On Rate 4x	Lattice On Rate 8x			Tip/Lattice Intensity	3.30012	3.39182	3.20334	2.53788	2.2321	1.84278	1.6682			2.925e-06	3.30012	0.113623						position	Lattice On Rate 0.125x growth1	Lattice On Rate 0.125x growth2	Lattice On Rate 0.125x growth3	Lattice On Rate 0.125x growth4	Lattice On Rate 0.125x growth5	Lattice On Rate 0.125x growth6	Lattice On Rate 0.125x growth7	Lattice On Rate 0.125x growth8	Lattice On Rate 0.125x growth9	Lattice On Rate 0.125x growth10	Lattice On Rate 0.25x growth 1	Lattice On Rate 0.25x growth 2	Lattice On Rate 0.25x growth 3
2496	52.6389	52.6857	60.75	56.45	63.8	102.7	74.4167	2496	1.52325	2.58595	6.38646	4.48254	7.2145	5.58614	25.2353			Median in range behind tip	56.045	60.45	65.9	84.25	102.171	124.35	135.625			5.85e-06	3.39182	0.164974						2496	55.8	57.5	53	45.45	43.8	54.75	56.6		54.65	52.2	58.8	50	62.6
2432	52.355	52.95	61.8	57.4167	65.7286	103.4	76.4833	2432	1.55421	2.45563	6.75389	5.01301	7.11689	4.10122	24.5836			Median Position	960	896	896	896	896	896	896			1.17e-05	3.20334	0.201909						2432	56.2	58	51.4	45.75	45.2	54.1	58.8	45.55	54.95	53.6	58.6	51.1	62.95
2368	52.965	53.4357	62.45	58.8333	67.7571	104.9	80.1833	2368	1.51855	2.42564	6.93952	5.51516	6.97628	3.3234	23.7826			Max	184.955	205.036	211.1	213.817	228.057	229.15	226.25			2.34e-05	2.53788	0.121967						2368	56.4	58.5	50.6	46.9	47.6	53.7	60.2	45.55	55.2	55	58.8	52.3	63.55
2304	53.855	54.3643	63.1	60.6	69.9714	86.0667	72.9875	2304	1.38839	2.43538	6.94064	5.91552	6.74845	16.9471	20.112			Max position	0	0	0	0	0	0	0			4.68e-05	2.2321	0.0447091						2304	57	58.7	50.2	48.8	51.4	53.5	60.8	46.3	55.45	56.4	59.6	53.45	64.5
2240	54.91	55.7571	63.65	62.4833	72.0429	75.45	78.5625	2240	1.22855	2.5951	6.86308	6.08643	6.56596	16.621	19.9304													9.36e-05	1.84278	0.0640069						2240	57.6	59.5	51	51.15	54.8	53.65	60.4	47.6	55.8	57.6	62.4	54.25	65.45
2176	55.78	57.0071	63.7	64.8333	74.4	75.95	84.95	2176	0.993131	2.63919	6.60663	6.14748	6.42778	16.9683	19.6381			median error	1.26709	2.24029	3.32378	3.81006	2.03216	4.31704	5.50822			0.0001872	1.6682	0.0683576						2176	58	59.3	52.4	54.3	58.2	53.85	58.2	49.05	56.1	58.4	64.4	55	66.05
2112	56.325	57.8429	63.65	67.4333	76.5143	76.45	91.45	2112	0.895272	2.6938	6.12918	5.91104	6.47303	17.223	19.5056			max error	4.80275	6.45871	7.98013	3.47726	0.539787	0.248747	1.23161											2112	58.4	58.2	54.6	57.65	60.4	54.25	54.8	50.15	56	58.8	66	55.95	66.15
2048	56.41	58.4	63.55	70.1333	78.4143	76.7	96.8375	2048	1.08491	2.6041	5.63355	5.58006	6.59723	17.59	19.5173																					2048	58.2	55.7	56.6	60.5	61.6	54.8	51.2	50.75	55.55	59.2	66.8	56.75	66.05
1984	56.215	58.4857	63.25	72.5167	80.0857	76.85	101.1	1984	1.41655	2.43735	4.78141	5.09828	6.75578	18.0248	19.595																					1984	58	52.2	58	62.6	62.2	55.4	48.6	50.8	54.75	59.6	66.2	57.65	65.75
1920	55.64	58.7286	62.85	74.2833	81.4286	77.2	104.45	1920	1.71956	2.18405	3.97893	4.59132	6.71634	18.1847	19.6687			propogated error	0.113623	0.164974	0.201909	0.121967	0.0447091	0.0640069	0.0683576											1920	56.4	49	59	63.95	62.2	56.05	47	50.1	53.1	59.6	65	58.7	65.6
1856	54.66	59.05	62.35	75.45	82.7286	77.85	107.037	1856	1.90131	1.93499	3.13159	3.85413	6.2956	17.9515	19.388																					1856	54	46.6	58.8	64.3	61.8	56.35	46.2	49.2	50.75	58.6	64	59.6	65.75
1792	53.755	59.7	61.95	76.3833	84.2143	79.15	109.275	1792	1.87245	1.80303	2.35306	3.2087	5.47605	16.9655	18.6535																					1792	51.6	45.7	58.4	63.3	60.8	56.25	47.2	48.45	48.45	57.4	63.6	60.35	65.95
1728	52.97	60.65	61.55	77.45	86.0429	81.25	111.562	1728	1.69881	1.82854	1.64526	2.6004	4.52078	15.4344	16.9772																					1728	49.4	46.4	57.8	60.85	59.6	56.3	48.8	47.9	46.65	56	63.6	60.65	66.5
1664	52.445	61.7286	61.3	78.5667	88.1571	84.25	114.525	1664	1.44626	2.00015	0.87892	2.16752	3.77564	13.3008	14.3797																					1664	48.4	47.8	57.6	57.6	57.8	56.35	51	48.05	45.45	54.4	64.4	60.65	67.25
1600	52.145	62.7071	60.75	79.55	90.5571	88.45	118.1	1600	1.18018	2.18423	0.465698	1.91569	3.47996	11.05	11.0115																					1600	49.2	49.6	57.6	54.1	55.4	56.2	52.6	48.75	45	53	66	60.7	67.85
1536	52.215	63.6071	60.05	80.2167	92.9429	93.05	122.275	1536	1.07891	2.42176	0.454835	1.74617	3.38344	8.8296	7.458																					1536	51	51.5	58.2	50.85	53.4	56.1	54	49.55	45.15	52.4	68	60.65	68.4
1472	52.505	64.05	58.9	80.2167	95.0143	97.7	126.337	1472	1.12511	2.53512	0.576628	1.75506	3.33396	6.95503	4.34689																					1472	53.8	52.6	58.8	48.75	51.6	55.75	54.6	50.3	45.45	53.4	69.2	60.05	68.9
1408	53	64.1357	57.8	79.4167	96.6429	102.3	129.875	1408	1.24282	2.70745	0.604152	1.85419	3.18401	5.8213	2.57812																					1408	56.8	53.4	59.4	47.9	50.8	55.5	55	51	45.8	54.4	70.4	59.05	69.1
1344	53.395	63.7214	57.05	78.6833	97.8143	106.55	132.787	1344	1.26154	2.78282	0.668487	1.95056	3.07196	5.24279	3.01229																					1344	58.8	53.4	59	48.15	51.4	55.65	54.6	51.4	46.15	55.4	70.2	57.8	68.85
1280	54.08	63.1643	57.2	78.2167	98.8286	110.35	134.375	1280	1.27354	2.77736	0.514782	2.12922	3.05606	4.9236	4.35063																					1280	60.4	53.3	59	49.35	53.2	56.15	54.8	51.4	46.6	56.6	69.8	56.55	68.4
1216	54.73	62.2929	57.95	78.5167	99.7286	113.65	135.125	1216	1.22183	2.65427	0.562917	2.484	2.99964	4.6002	5.38254																					1216	61.2	52.6	57.8	51.25	56	57	55	51.15	47.5	57.8	68.2	55.95	68.1
1152	55.305	61.4286	59.2	79.4667	100.5	116.4	135.225	1152	1.21022	2.5294	1.07471	2.96532	2.98493	4.13038	6.18793																					1152	61.2	51.9	56.4	53.4	58.6	57.7	55.8	50.55	48.7	58.8	67	56.3	67.7
1088	55.77	60.5643	60.9	80.8667	101.243	118.75	135.213	1088	1.27055	2.38457	1.58193	3.40479	2.7525	3.68875	6.57468																					1088	61	50.9	55.6	55.25	60.2	57.85	57.2	49.75	50.15	59.8	65.6	57.65	67.3
1024	55.99	60.0143	62.6	82.15	101.771	120.7	134.85	1024	1.28718	2.31432	2.27266	3.84287	2.5235	3.52527	6.4778																					1024	60.2	50.8	54.4	56.55	61.4	57	58.8	48.95	52	59.8	65.2	59.9	66.8
960	56.045	60.0357	64.15	83.3333	101.943	122.7	134.838	960	1.26709	2.24646	2.80569	3.91341	2.20629	3.78847	6.07864																					960	59	51.2	54	57.6	61.2	54.75	60.6	48.4	54.3	59.4	65	62.75	66.1
896	56.105	60.45	65.9	84.25	102.171	124.35	135.625	896	1.30097	2.24029	3.32378	3.81006	2.03216	4.31704	5.50822																					896	57.6	52	55	58.25	61	51.9	62.2	48.3	56.6	58.2	65	65.75	65.2
832	56.015	61.3643	67.75	84.9167	102.429	125.45	137.463	832	1.44276	2.19058	3.72584	3.53557	2.11879	4.90019	4.75662																					832	55.8	52.3	56.4	58.8	61.4	49.45	63.2	48.45	58.35	56	64.6	68.75	64.2
768	56.125	62.7429	70.05	85.5667	103.243	126.8	140.387	768	1.63461	2.22069	4.0604	3.10105	2.58077	5.505	4.43214																					768	55.4	52.2	58	59.4	62.4	47.7	63.8	48.8	59.35	54.2	64.4	71.45	63.55
704	56.675	64.5071	72.65	86.75	104.886	127.85	144.6	704	1.88143	2.24055	4.25815	2.6789	3.09868	5.80791	4.33532																					704	56.2	52.4	60.2	59.9	65.2	47.05	64.8	49.5	59.5	52	64.4	73.35	63.4
640	57.875	66.8071	75.65	88.8	107.586	130.25	149.975	640	2.11033	2.3146	4.32919	2.42201	3.55622	5.72118	4.42752																					640	59.2	53.2	62.6	60.25	68.2	47.95	66.8	50.35	59.4	50.8	65.8	74.9	64.15
576	60.245	70.1786	79.15	92.0833	111.586	134.25	156.225	576	2.46536	2.5727	4.37457	2.41113	3.81225	5.09479	4.60603																					576	64.6	55.2	65.8	60.2	73.2	50.3	70.4	51.9	60.25	50.6	68.2	77.05	66.4
512	64.66	75.4357	84.3	97.3833	117.743	140.1	163.062	512	2.9473	2.95529	4.64624	2.6502	3.87614	4.05802	4.75162																					512	73.2	59.6	71.4	60.1	79.6	54.35	76.6	55.15	63.8	52.8	72.2	81.05	71.2
448	71.84	83.8357	92.1	105.433	126.2	148.6	170.3	448	3.62065	3.29416	5.53421	3.11784	3.7569	2.96057	4.7162																					448	85.8	66	79.2	61.85	88.2	61.15	86.4	60.9	71.7	57.2	79.8	88.55	79.1
384	82.87	96.3286	103.8	116.7	138.171	158.95	178.087	384	4.29121	3.29616	6.9199	3.6174	3.61238	2.1417	4.24037																					384	101.6	75.6	90.6	67.9	99.6	71.35	100.6	70.25	84.6	66.6	91.8	100.45	90.45
320	98.625	113.614	120.4	131.983	153.629	171.3	186.5	320	5.00761	3.04666	8.74214	4.07611	3.40046	1.73277	3.36935																					320	122.6	88.8	106.2	79.85	115.4	85.15	119.8	83.95	102.7	81.8	110.8	117.45	106.05
256	118.885	135.55	141.5	150.65	172.3	185.1	195.6	256	5.58422	2.99096	10.1446	4.58729	3.07717	1.88878	2.20454																					256	147	106	127	98.95	135.6	102.75	142.8	101.8	124.35	102.6	136.4	139.25	125.8
192	141.775	159.814	164.95	171.5	192.614	200.05	205.588	192	5.82392	3.49509	10.9486	4.72082	2.55873	1.78938	1.28311																					192	172.2	126.1	150.8	124.45	158.6	123.1	166.4	122.6	146.3	127.2	165.4	163.9	148.4
128	163.435	182.7	187.45	191.65	211.286	213.5	215.125	128	5.72707	4.48898	10.8258	4.5332	1.84539	1.63783	1.24065																					128	193.4	146.1	173.4	151.8	180	143.35	187.6	143	165.1	150.6	193.6	187.35	170.35
64	179.24	199.007	204.3	207.1	224.371	224.25	222.988	64	5.33284	5.53457	9.83069	4.03065	0.974305	0.83479	1.48454																					64	205.4	161.9	189	174.1	195.8	159.15	202.4	158.95	176.7	169	215	203.8	186.05
0	184.955	205.036	211.1	213.817	228.057	229.15	226.25	0	4.80275	6.45871	7.98013	3.47726	0.539787	0.248747	1.23161																					0	206.6	168.4	193.4	184.7	200.2	165.75	206.8	166.8	178.5	178.4	226.4	208.25	190.6
-64	178.93	198.607	205.1	209.483	220.271	225.75	222.213	-64	4.10641	7.04187	5.88579	3.2796	1.41403	1.23364	1.34355																					-64	196	165.2	185.6	179.75	191.4	161.05	198.6	164.05	170.25	177.4	223.6	198.5	181.75
-128	162.465	181.193	186.95	194.05	201.343	212.9	209.6	-128	3.41646	7.49702	4.04992	3.83882	2.36228	1.43091	2.90431																					-128	177.4	152.1	167	161.05	170.2	146.3	179	151.1	153.9	166.6	207.4	176.55	161.2
-192	139.54	156.8	160.15	170.533	174.386	191.65	187.838	-192	2.86503	7.73184	2.67056	4.82808	3.17326	1.1322	4.86889																					-192	154.2	133.5	143	134.7	142.2	125.3	150.6	130.75	132.75	148.4	181.2	148.05	134.35
-256	114.78	130.093	129.95	143.55	144.129	164.6	159.55	-256	2.64316	7.48681	2.2264	5.85082	3.59323	2.00125	6.34128																					-256	130.4	112.1	117.2	107.5	113.2	102.85	120.2	107.3	110.45	126.6	149.4	119.05	107.8
-320	92.655	105.65	102.1	117.75	115.2	135.35	129.2	-320	2.5723	6.63858	1.99311	6.26107	3.59274	3.95055	6.94586																					-320	109.2	92.4	95	85.1	88.4	83.1	92.4	85.35	90.4	105.2	118.6	94.2	85.95
-384	75.345	85.8286	79.65	96.35	90.8857	108.2	100.45	-384	2.45706	5.39009	1.67089	5.89613	3.21555	5.58614	6.60506																					-384	91.8	75.7	78	69.45	70	67.8	71.4	67.7	74.8	86.8	92.4	76.05	69.95
-448	63.55	71.7286	64	79.9667	72.6143	85.3	76.7125	-448	2.36252	4.09442	1.47817	4.91735	2.61631	6.33778	5.60798																					-448	79.4	63.3	66.4	59.45	59	56.7	57.8	55.1	64.35	74	73.4	64.45	59.25
-512	56.56	62.8643	54.55	68.8667	60.4	68.2	58.825	-512	2.22504	3.15971	1.28914	3.76694	2.05208	6.18345	4.23975																					-512	70.8	54.9	60.4	53.55	53.8	49.4	50.8	47.55	58.4	66	62.2	57.75	52.5
-576	52.92	57.5786	49.7	62.0667	53.2429	56.8	47.4625	-576	2.0108	2.41589	1.05	2.86382	1.89067	5.37634	3.00569																					-576	64.4	50.5	58.4	50.3	52	45.05	49	43.7	55.05	60.8	55.8	54.5	48.55
-640	51.32	54.7143	47.6	58	49.8571	49.95	40.95	-640	1.84937	1.96317	1.12472	2.41672	1.9284	4.31357	2.15334																					-640	60	48.4	57.6	48.3	52.8	43.3	49.8	41.9	52.7	58.4	53.2	53.5	46.3
-704	50.915	53.05	47.1	55.5667	48.8286	46.15	38.0125	-704	1.73403	1.71235	1.64393	2.2825	1.87559	3.31992	1.77802																					-704	57.2	47.9	57.8	47.15	53.8	43.55	52.2	41.6	50.75	57.2	52	53.7	45.05
-768	50.97	52.2714	47.45	54.2667	49.1	44.75	36.9875	-768	1.58444	1.57253	2.12058	2.16419	1.79739	2.69014	1.62869																					-768	54.8	48.1	57.6	46.9	55.2	45.35	54.6	42.3	48.85	56	52.2	54.55	44.55
-832	51.205	51.7857	47.45	53.35	49.9571	44.15	36.7	-832	1.47079	1.46892	2.45802	2.15687	1.64724	2.37632	1.8715																					-832	53	48.1	57	47.2	56.8	48.5	56	43.45	47	55	51.8	55.5	45
-896	51.74	51.7857	47.45	52.9167	51.0714	44.2	37.05	-896	1.45286	1.32097	2.58687	1.97068	1.516	1.98368	2.16492																					-896	52	48.3	56.2	48.15	58.4	52.6	57	44.75	45.6	54.4	52.2	56.15	46.75
-960	52.16	52.0929	47.55	52.7833	51.8286	44.45	37.45	-960	1.53201	1.18565	2.35942	1.89186	1.40534	1.69466	2.55869																					-960	50.4	48.2	55.2	49.3	60.2	56.7	56.8	45.9	45.1	53.8	53	56.25	49
-1024	52.375	52.4071	47.8	52.9333	52.3286	44.65	37.75	-1024	1.71265	1.07932	2.06155	2.00522	1.43381	1.3122	2.82611																					-1024	49	47.6	54.2	50.1	62	59.75	56.6	46.3	45.4	52.8	53.6	55.6	51.25
-1088	52.375	52.5357	48.35	53.2333	52.1857	44.8	38.1625	-1088	1.85014	1.01814	1.88597	2.24755	1.50894	0.948683	3.03847																					-1088	47.6	47.3	53.6	50.3	62.6	61.75	56.4	45.65	46.55	52	53.8	53.95	53.4
-1152	51.975	52.8429	49.5	53.55	51.6571	44.5	37.9625	-1152	1.87461	1.15879	2.10297	2.50752	1.78735	0.722842	2.99851																					-1152	46.6	46.6	53.4	50.1	62.2	62.1	55	44.35	48.4	51	54.6	51.7	55
-1216	51.715	52.9071	50.4	53.75	50.9571	44.35	37.4375	-1216	1.84295	1.44922	2.4259	2.61106	1.99896	0.849632	3.0228																					-1216	46	46.6	54	49.55	61.8	60.95	53.8	42.9	50.55	51	54.8	49.05	56.3
-1280	51.47	52.95	51.3	53.55	50.1857	43.95	36.9	-1280	1.73934	1.77209	2.81469	2.59463	2.26134	1.0497	2.88314																					-1280	46.8	46.3	54.6	48.85	60.6	59.15	52.6	41.85	52.55	51.4	54.4	46.55	57.7
-1344	51.51	53.0571	51.55	53.3167	49.3857	43.3	36.4875	-1344	1.58823	1.96044	3.13159	2.39541	2.47456	1.70367	2.75013																					-1344	48.8	46.4	55	48.7	59.6	56.8	51.8	41.6	54	52.4	54.2	44.85	58.95
-1408	51.735	53.0786	51.35	52.8833	48.7714	42.45	36.325	-1408	1.40305	2.1096	3.46076	2.15901	2.58739	2.08252	2.69615																					-1408	50.8	47.2	55.4	49.15	58.4	54.95	51.2	42.3	54.75	53.2	53.4	44.05	60.1
-1472	52.165	53.2	51.2	52.6167	48.4	41.3	36.5375	-1472	1.199	2.14457	3.5798	1.94314	2.4885	2.22767	2.67847																					-1472	53.6	48.4	54.4	50.15	57.6	54	51	43.6	54.9	54	53.4	44.2	60.8
-1536	52.715	53.4071	50.8	52.3667	48.5143	40.05	37.1875	-1536	1.03646	2.02556	3.51852	1.80934	2.16724	2.32849	2.58266																					-1536	55.6	50.1	53.2	51.6	57	53.75	52.4	44.65	54.85	54	53	45.4	60.65
-1600	53.14	53.3786	50.45	52.1833	48.8857	38.75	37.975	-1600	0.991408	1.77424	3.34841	1.99143	1.69687	2.16492	2.44294																					-1600	56.8	51.1	51.8	53.15	56	54.2	54.4	45.1	54.65	54.2	52.2	47.75	59.7
-1664	53.6389	53.0857	50.15	52.1333	49.2429	37.9	38.5125	-1664	1.19608	1.31563	3.14434	2.30334	1.26779	1.88878	2.21517																					-1664	58		50.6	54.5	54.8	54.6	57.2	45.2	54.45	53.4	51.2	50.45	58.15
-1728	53.7389	52.8643	49.85	52.2167	49.6	37.4	38.95	-1728	1.37272	1.00726	2.91408	2.51423	0.957249	1.44741	1.79356																					-1728	58.2		50	55.4	53	54.25	60	45.05	54.35	53.4	49.6	53.2	56.65
-1792	53.55	52.7286	49.15	52.2167	49.7571	37.5	38.8375	-1792	1.58745	0.980101	2.50037	2.60004	0.99711	1.02103	1.30424																					-1792	58.4		50.2	55.9	50.4	53.15	62.4	44.9	53.8	52.8	47.8	55.55	55.75
-1856	53.2	52.8286	48.6	52.6333	49.6429	37.9	38.45	-1856	1.7214	1.26438	2.06155	2.57182	1.20642	0.698212	0.858414																					-1856	58.2		50.8	56	48.2	51.3	63.8	45.5	52.8	52.2	46.4	57.1	56.3
-1920	52.7389	53.1929	47.8	52.8167	49.1429	38.5	37.725	-1920	1.72616	1.59016	1.86414	2.57514	1.51709	0.460977	0.734315																					-1920	57.2		52.8	55.65	46.6	49.3	63.8	46.7	51.8	50.8	45.8	57.8	58.15
-1984	52.2556	53.9143	47.45	53.0833	48.7143	39.35	36.75	-1984	1.67135	1.92138	1.78798	2.67669	1.80797	0.449305	1.00592																					-1984	56		54.6	54.7	46.2	48.05	63	48	50.75	49	46	57.65	60.55
-2048	51.7556	54.5786	47.15	52.9333	48.3286	40.5	36.3375	-2048	1.59893	2.29195	2.03147	2.72108	2.1634	0.287228	1.22594																					-2048	55		55.8	53.5	46.4	48	61.6	49.1	49.8	46.6	46.8	57	62.65
-2112	51.5111	53.5417	47.5	52.8667	47.9429	41.55	36.175	-2112	1.45491	2.76366	2.5025	2.67827	2.24089	0.248747	1.41703																					-2112	54.4		56.2	52.25	47.6	49.55	60	49.55	48.65	45.4	48	56.25
-2176	51.4556	53.7167	48.1	52.2833	47.8143	42.05	36.4375	-2176	1.4688	3.12218	2.89266	2.38402	2.15789	0.389711	1.47218																					-2176	54.6		56.6	51	48.6	52.1	59.2	49.05	47.35	44.6	49.8	55.7
-2240	51.4889	53.6333	49.05	51.85	47.9714	42.25	37.025	-2240	1.63984	3.30065	3.07439	2.14162	2.04248	0.540255	1.21777																					-2240	54.6		57.6	50.15	48.6	54.65	59.2	48	46.4	44.2	51	55.4
-2304	51.75	53.3083	49.75	52.68	48.2	42.15	37.625	-2304	1.78702	3.22332	2.99113	1.81161	1.85164	0.759523	0.909928																					-2304	54.4		59	49.5	48.6	56.05	60	46.7	45.9	45.6	51.8	55.45
-2368	51.8556	53.0333	50.35	51.94	49	41.55	38.075	-2368	1.95	2.95162	2.82434	1.83948	1.72662	0.903811	0.564994																					-2368	53.8		60.6	48.9	48	56.2	61	45.3	46.1	46.8	52	55.8
-2432	52.0444	54.79	50.45	51.3	49.9571	41.2	38.325	-2432	2.0962	2.29384	2.50237	2.02504	1.75218	1.03199	0.285865																					-2432	53.4		62.2	48.3	47.6	55.35	62.2	44.15	46.8	48.4	52.4	56.15
-2496	51.8944	54.77	50.5	51	50.8286	40.95	37.8667	-2496	2.21027	2.18612	2.16852	2.30547	1.71687	0.998436	0.237268																					-2496	52.2		62.6	47.6	47	53.85	63.4	42.95	47.65	49.8	53.8	56.45
[truncated: 29 more columns]

## Sheet: Fig. 2 E middle
average background subtracted									std error											average								Individual growth events
position	Edge On Rate 0.18x	Edge On Rate 0.35x	Edge On Rate 0.7x	Edge On Rate 1.4x	Edge On Rate 2.9x	Edge On Rate 5.8x	Edge On Rate 11.6x		position	Edge On Rate 0.18x	Edge On Rate 0.35x	Edge On Rate 0.7x	Edge On Rate 1.4x	Edge On Rate 2.9x	Edge On Rate 5.8x	Edge On Rate 11.6x			position	Edge On Rate 0.18x	Edge On Rate 0.35x	Edge On Rate 0.7x	Edge On Rate 1.4x	Edge On Rate 2.9x	Edge On Rate 5.8x	Edge On Rate 11.6x		Position	Edge On Rate 0.18x growth1	Edge On Rate 0.18x growth2	Edge On Rate 0.18x growth3	Edge On Rate 0.18x growth4	Edge On Rate 0.18x growth5	Edge On Rate 0.18x growth6	Edge On Rate 0.18x growth7	Edge On Rate 0.18x growth8	Edge On Rate 0.35x growth1	Edge On Rate 0.35x growth2	Edge On Rate 0.35x growth3	Edge On Rate 0.35x growth4	Edge On Rate 0.35x growth5	Edge On Rate 0.35x growth6	Edge On Rate 0.35x growth7	Edge On Rate 0.35x growth8	Edge On Rate 0.7x growth1	Edge On Rate 0.7x growth2	Edge On Rate 0.7x growth3	Edge On Rate 0.7x growth4	Edge On Rate 0.7x growth5
2496	5.5	16.9196	12.4286	23.1	16.4	7.06671	10.7667		2496	2.92155	3.33908	4.78533	0.319179	3.85057	3.62142	3.37757	4.03068		2496	58.5125	68.7071	62.2857	73.45	61.95	53.0239	54.5833		2496	59.8	44.4	70.2	48.2	62.8	56.3	67.4	59	82.8	77.6		61.8	63	73.35	56	66.4	72.8	53.6	76	60.2	44
2432	4.8375	16.2554	12.0571	22.6	17.9	7.6	13.05		2432	2.90291	3.22785	4.93502	1.08484	3.91304	3.70493	4.18348	3.9789		2432	57.85	68.0429	61.9143	72.95	63.45	53.5571	56.8667		2432	60.2	45.8	71.7	46.4	61	56.1	65	56.6	82.2	77		60.2	64.2	69.75	55.8	67.15	73.2	48	76.4	61.5	47.4
2368	4.825	14.5063	11.8429	22.15	19.25	7.92614	14.9167		2368	2.86078	3.01278	5.11752	1.67705	3.81314	3.79461	4.66166	3.94952		2368	57.8375	66.2938	61.7	72.5	64.8	53.8833	58.7333		2368	60	48.8	72.9	45.2	61.6	55.5	63	55.7	81	76.6	56.75	59.4	65.8	66.65	55.6	68.55	74.2	44	75.2	63.7	50.4
2304	5.575	14.675	11.7571	22.45	19.9	8.26429	16.1667		2304	2.82679	2.96342	5.413	2.04817	3.72383	3.83006	4.75654	4.01063		2304	58.5875	66.4625	61.6143	72.8	65.45	54.2214	59.9833		2304	59.6	53.4	73.9	44.8	63.6	55.2	62.4	55.8	80.4	76.4	58.9	58.6	67.6	64.1	55.2	70.5	75.8	41.8	73.8	65.6	52.2
2240	6.8	15.0625	11.9714	22.9	20.2	8.54757	16.7		2240	2.84591	2.88603	5.52758	2.15682	3.49025	3.703	4.478	4.09605		2240	59.8125	66.85	61.8286	73.25	65.75	54.5047	60.5167		2240	59	58.4	74.7	45.2	66.2	55.5	63	56.5	79.6	75.6	60.4	58.6	69.8	62.05	56	72.75	76.8	42.4	71.4	67.6	52.2
2176	8.375	15.4188	12.3	23.45	19.95	8.88814	16.4		2176	2.87502	2.9052	5.45422	2.29674	3.52172	3.61292	3.95941	4.31459		2176	61.3875	67.2063	62.1571	73.8	65.5	54.8453	60.2167		2176	58.2	64	75	46.2	68.8	56.8	64.2	57.9	79.4	75.4	61.15	59.2	70.8	60.3	56.8	74.6	76.6	45	69	68.7	51.2
2112	9.7125	16.0187	12.8714	23.65	19.35	9.57143	15.8167		2112	2.8288	2.78136	5.4204	2.4779	3.65821	3.4076	3.4447	4.42524		2112	62.725	67.8062	62.7286	74	64.9	55.5286	59.6333		2112	57.6	67.6	74.7	47.8	70.8	59.1	65	59.2	79.2	74.8	61.25	61.2	71.6	59	59.4	76	75.8	48.8	67.8	69.2	49.2
2048	11.1625	16.7625	13.3143	23.6	18.9	10.4833	15.0917		2048	2.69286	2.67837	5.39379	2.76349	3.85641	3.06635	3.0481	4.477		2048	64.175	68.55	63.1714	73.95	64.45	56.4404	58.9083		2048	57.8	71	73.7	49.6	71.4	62.2	66.8	60.9	80	73.8	60.9	64	71.4	58.45	62.6	77.25	74.8	52.4	66.6	69	47
1984	12.4375	17.8937	13.7714	23.4	18.4	11.5476	14.575		1984	2.44738	2.69309	5.37009	2.9482	4.01521	2.66782	2.69785	4.15561		1984	65.45	69.6812	63.6286	73.75	63.95	57.5047	58.3917		1984	59	72	73	51.6	71.2	65.8	68.4	62.6	81.6	73.6	60.45	67	71.2	58.75	66.2	78.65	74.2	56.6	66.4	67.9	44.6
1920	13.9125	18.9625	14.5	23.1	18.4	12.9071	14.2083		1920	2.12447	2.7212	5.26993	2.96595	4.09046	2.24896	2.36994	3.58976		1920	66.925	70.75	64.3571	73.45	63.95	58.8643	58.025		1920	61.6	71.4	72.1	54	71	70.4	70.4	64.5	83	72.2	60.25	70	70.6	59.85	69.8	80.3	74.6	60.8	66	67.9	43.2
1856	15.45	20.0312	15.3714	22.9	18.35	14.481	14.2083		1856	1.91629	2.7758	4.92862	2.81991	3.94367	1.90342	2.08745	2.96141		1856	68.4625	71.8187	65.2286	73.25	63.9	60.4381	58.025		1856	64.8	69	71.4	56.6	71.4	75.2	72.4	66.9	84	71.2	60.75	72.2	69.6	61.35	73.4	82.05	74.8	64.8	66.6	67.6	44
1792	16.65	20.725	16.4286	22.65	18.4	15.9071	14.8		1792	1.9439	2.79034	4.37037	2.79553	3.57448	1.86457	2.08439	2.57247		1792	69.6625	72.5125	66.2857	73	63.95	61.8643	58.6167		1792	67.4	65.6	70.5	59.2	72.8	79.1	73	69.7	84.6	69.4	61.85	73	69.2	63.05	75.6	83.4	75.4	68.4	67.4	68.2	46.4
1728	17.6625	21.05	17.5714	22.7	18.15	17.3619	15.6417		1728	2.15803	2.65534	3.60236	2.72431	3.07612	2.04499	2.2893	2.59624		1728	70.675	72.8375	67.4286	73.05	63.7	63.319	59.4583		1728	69.4	61.8	70	62.2	74.2	81.7	72.8	73.3	84.2	68.8	63.2	73	68.4	64.75	77	83.35	75.4	71	68.6	69.2	50.6
1664	18.2125	21.1875	18.9143	23	17.95	18.7619	16.7833		1664	2.41284	2.39177	2.70802	2.6827	2.70416	2.37428	2.71743	2.75542		1664	71.225	72.975	68.7714	73.35	63.5	64.719	60.6		1664	70.2	58.6	69.8	64.8	75.2	82.4	72.4	76.4	83.6	69.2	64.6	72	68.6	66.2	77.6	82	75.4	72.8	70.6	70.3	56
1600	18.4375	21.0938	20.0286	23.25	18.15	19.65	17.65		1600	2.64622	2.02698	1.95171	2.59326	2.36379	2.52906	3.26	2.75193		1600	71.45	72.8813	69.8857	73.6	63.7	65.6071	61.4667		1600	70.2	56.2	69.9	66.8	75.8	82.2	71.6	78.9	82.6	70.6	65.95	70.8	68.4	67.85	77	79.85	75.4	73.4	72.8	71.3	61.2
1536	18.325	21.4	21.0857	23.3	18.6	20.281	18.5167		1536	2.77775	1.74707	1.50399	2.417	2.308	2.50235	3.73375	2.52387		1536	71.3375	73.1875	70.9429	73.65	64.15	66.2381	62.3333		1536	70.2	54.8	70.2	67.8	74.2	81.7	71	80.8	82.8	73.6	67.4	70	69	69.25	76	77.45	75.2	74	75	72.3	65.6
1472	18.3125	21.7187	21.9143	24.05	19.9	20.7261	18.8667		1472	2.82825	1.77976	1.38471	2.13659	2.17758	2.42248	4.16521	2.19206		1472	71.325	73.5062	71.7714	74.4	65.45	66.6833	62.6833		1472	70.4	54.8	71.2	68.4	71.6	82.3	70.2	81.7	84.2	76.4	68.7	69.8	68.4	70.15	75	75.4	76	74.4	76	72.8	68.2
1408	18.6375	22.1	22.3429	25.1	21.1	21.069	18.925		1408	2.87875	1.90949	1.27663	1.83354	2.02407	2.35962	4.27363	1.98796		1408	71.65	73.8875	72.2	75.45	66.65	67.0261	62.7417		1408	72	55.8	72.8	68.2	69.4	83.8	69.2	82	85.2	79.4	69.9	70.2	67.8	71.05	74.2	73.35	76.2	74.4	76.2	73.1	69.2
1344	19	22.5938	22.7571	26.45	22.45	21.8071	19.0417		1344	2.85473	2.03057	1.28546	1.79165	2.05305	2.47479	4.29574	1.79724		1344	72.0125	74.3813	72.6143	76.8	68	67.7643	62.8583		1344	73.8	58.6	74	68	67	85.5	67.6	81.6	85.8	81.8	71.45	71.2	68	71.35	74.2	71.25	77.4	75	75.8	73	69.6
1280	19.7125	23.1	23.3	27.6	23.5	22.8833	19.1833		1280	2.85459	2.01506	1.41362	1.81573	2.12529	2.66229	4.09152	1.6006		1280	72.725	74.8875	73.1571	77.95	69.05	68.8404	63		1280	76.8	62.4	75	67.2	66.4	87.4	66	80.6	84.8	83.8	73.4	72.6	69.2	71.1	74.6	69.6	78.6	76.2	75.8	73.3	69.4
1216	20.9	23.9375	23.8429	28.4	24.25	24.3547	19.375		1216	2.82508	1.94924	1.51926	1.79496	2.37592	2.70736	3.65442	1.37916		1216	73.9125	75.725	73.7	78.75	69.8	70.3119	63.1917		1216	80	67	75.9	66.6	67.8	88.6	65.2	80.2	83	85.8	75.35	74.2	71.6	70.9	76	68.95	79.6	77.4	75.6	73.3	69.4
1152	22.325	25.1	24.6143	28.5	24.85	25.681	20.0333		1152	2.85312	1.83662	1.64288	1.7441	2.48495	2.5275	3.10624	1.26035		1152	75.3375	76.8875	74.4714	78.85	70.4	71.6381	63.85		1152	83	72	76.3	66	70.4	89.4	64.8	80.8	80.6	87.6	76.75	76.8	74.8	70.8	77.6	70.15	80.2	79.6	75.8	73.8	70.4
1088	23.8375	26.5063	25.4429	27.9	25.6	26.8761	20.8833		1088	2.88828	1.78534	1.77431	1.38992	2.40455	2.21892	2.66531	1.47794		1088	76.85	78.2938	75.3	78.25	71.15	72.8333	64.7		1088	86	76.6	76.6	65.8	72.6	89.2	65.6	82.4	78.4	89.4	77.95	79.8	77.8	70.85	78.6	73.55	80.4	81.4	76.6	75.5	72.2
1024	25.3625	27.975	26.6	27	26.3	28.0024	21.875		1024	2.85667	1.90548	1.91395	0.875714	2.19815	1.88274	2.21881	2.01117		1024	78.375	79.7625	76.4571	77.35	71.85	73.9596	65.6917		1024	89	80	77.2	66.6	74.6	87.8	67.2	84.6	77.2	91.6	79.2	82.2	79.8	71.05	79	78.05	80.4	83.4	77.6	78.2	74.6
960	26.6625	29.5875	28.1286	26.2	27	28.9071	22.9417		960	2.78521	2.15142	2.14632	0.588961	1.92922	1.72286	2.03348	2.79084		960	79.675	81.375	77.9857	76.55	72.55	74.8643	66.7583		960	91.6	82.2	77.8	68.4	75.8	85.8	69	86.8	78	94.4	80.65	83.6	81	71.25	79.2	82.9	81	84.4	79.2	83	76.6
896	27.7875	31.1625	30	25.55	28.05	30.131	23.8667		896	2.64746	2.46214	2.38292	0.585235	1.42302	1.61542	2.00256	3.91289		896	80.8	82.95	79.8571	75.9	73.6	76.0881	67.6833		896	94	83.4	78.2	71.6	76.6	83.3	71	88.3	80	97.4	83.05	84.4	81.6	71.3	79	86.85	81.8	85.4	81.4	87.9	78.2
832	28.85	32.6313	32.1571	25.2	29.45	31.319	24.8083		832	2.43702	2.70696	2.7666	0.701338	0.982344	1.62404	1.98997	4.9716		832	81.8625	84.4188	82.0143	75.55	75	77.2761	68.625		832	95.8	83.6	78.8	76	77.4	81.6	73.2	88.5	83.2	99.8	86.45	84.2	81.8	71.2	79.6	89.1	83	86	84.6	93.6	80.2
768	30	34.0875	34.2714	24.8	30.7	32.9476	25.95		768	2.23903	2.9056	3.19392	0.672216	0.788591	1.86126	1.94674	5.96174		768	83.0125	85.875	84.1286	75.15	76.25	78.9047	69.7667		768	97	83.8	78.9	82	78.8	80	75.6	88	87	101.2	90.95	83.2	82.6	71.05	81	90	85.2	85.8	87.8	99.1	81.2
704	31.4625	35.85	36.5857	24.9	32.5	35.2239	27.6667		704	2.06668	3.09814	3.63508	0.580409	0.725862	2.47157	2.04836	6.973		704	84.475	87.6375	86.4429	75.25	78.05	81.181	71.4833		704	97	84	79.2	88.2	81.2	79.8	78.8	87.6	91.2	102	96.25	82.6	84.4	71.3	83.8	89.55	88.6	85.6	91.2	104.1	82.6
640	33.35	37.9312	39.0286	26.25	34.65	38.3024	30.1167		640	1.98651	3.20023	4.20284	0.489898	0.696419	3.33432	2.16627	7.85501		640	86.3625	89.7188	88.8857	76.6	80.2	84.2596	73.9333		640	96.6	84.8	80.2	94	84.8	81.2	82	87.3	94.6	101.8	101.75	83.2	87.4	72.75	88	88.25	93.8	85.4	94	109.5	83.6
576	35.7875	40.6187	42.3	29.1	38.45	42.7667	34.2667		576	2.06193	3.30592	4.77544	0.613901	0.689202	4.19607	1.98748	8.33806		576	88.8	92.4062	92.1571	79.45	84	88.7239	78.0833		576	96.8	85.4	81.9	99.2	90	83.2	86.2	87.7	98.2	101.8	107	84.8	91.6	75.85	93.2	86.8	100.4	86.2	97.2	115.4	84.6
512	39.1	44.0062	46.8	34.8	44.2	49.4881	40.5583		512	2.24259	3.36429	5.37621	1.43069	0.936416	4.94226	1.55928	8.54118		512	92.1125	95.7937	96.6571	85.15	89.75	95.4453	84.375		512	98.6	87	84.6	104.2	95.6	86.6	90.8	89.5	102.6	102.2	111.2	88.2	96.6	80.8	99.2	85.55	108.2	88.8	101.4	122.1	86.4
448	42.9625	48.55	53.0714	44.1	53.6	59.4357	49.6917		448	2.36714	3.36358	5.73235	2.58396	1.84306	5.50169	0.9911	8.19241		448	95.975	100.338	102.929	94.45	99.15	105.393	93.5083		448	101.6	88.8	88.3	108.2	101.4	91.3	96.2	92	107.2	104.8	114.35	93.6	103.8	87.75	105.6	85.6	116.4	93.2	108.2	129.3	90.2
384	47.9625	54.5813	61.7	57.5	67.8	73.4381	62.925		384	2.47801	3.36351	5.90634	3.83169	3.00031	5.71247	0.99306	7.61418		384	100.975	106.369	111.557	107.85	113.35	119.395	106.742		384	106.6	92	93	112.6	107.6	97.6	102.4	96	113.4	109.4	117.3	99.8	112.4	96.45	113.6	88.6	125.2	100.4	119.2	137.3	95.6
320	53.7125	62.2812	72.6571	75.25	87.05	91.9476	81.0333		320	2.59475	3.38091	5.83331	4.85747	4.24912	5.6277	1.7438	6.98813		320	106.725	114.069	122.514	125.6	132.6	137.905	124.85		320	113	96.2	97.8	117	114	105.5	109.4	100.9	121.6	115.8	120.65	107	123.4	105.9	122.8	95.4	133.2	110.8	134.6	145.8	103.6
256	60.6125	71.1687	85.9	97.05	110.5	114.302	103.708		256	2.74031	3.47031	5.64883	5.42817	5.21266	5.2202	2.54094	6.65805		256	113.625	122.956	135.757	147.4	156.05	160.26	147.525		256	121.2	102.4	103	122	120.8	114.8	117.8	107	132.2	123.8	125.8	115.2	135	114.55	132	105.1	142.4	123.4	152.2	155.3	115.4
192	67.9625	80.6875	100.114	121.2	135.85	138.326	129.383		192	2.93475	3.74604	5.47882	5.35648	5.38609	4.50083	3.06195	6.57087		192	120.975	132.475	149.971	171.55	181.4	184.283	173.2		192	130.2	110.2	108.6	127.4	128.4	123.1	126.8	113.1	143.8	133	133.45	123.8	147.2	121.8	141.2	115.55	151.8	137.6	170.6	164.7	129.4
128	74.8125	89.2125	114.086	145.05	159	160.512	154.417		128	3.18619	3.97257	5.30013	4.38577	4.76045	3.4317	2.98977	6.59537		128	127.825	141	163.943	195.4	204.55	206.469	198.233		128	138.6	118.8	113.8	133.2	135.8	130.2	134.8	117.4	154.2	141.2	142.35	131.8	157	127.25	148.8	125.4	162.8	151.6	187	173.9	144.4
64	79.7625	95.3937	124.871	164.05	174.85	176.555	173.808		64	3.25032	4.1202	5.05951	2.91376	3.50286	2.19086	2.31798	6.23831		64	132.775	147.181	174.729	214.4	220.4	222.512	217.625		64	144	126.2	118.2	137.4	141.8	133.9	139.8	120.9	161.4	146.6	150.65	139	163.4	130.25	153.6	132.55	173	162	198.8	180.8	157
0	81.7375	97.7188	129.471	172.85	179.25	181.014	182.625		0	3.24634	4.14179	4.71293	1.55724	2.10119	1.19603	1.37297	5.15922		0	134.75	149.506	179.329	223.2	224.8	226.971	226.442		0	145.2	130	120.3	138.4	145	134.8	142.2	122.1	162.8	147.8	155.75	143.2	164.6	130.4	156.2	135.3	179	166	203.6	182.1	164.4
-64	79.6375	95.025	125.814	168.1	169.5	171.998	178		-64	3.0039	3.95568	4.4781	2.59651	1.0963	1.5712	1.50724	3.7496		-64	132.65	146.812	175.671	218.45	215.05	217.955	221.817		-64	140.2	128.2	119.4	135.6	143.8	133.4	139.8	120.8	157.6	143.8	155.5	142.8	159.2	127.25	155	133.35	178	161.4	199.6	176.2	163.2
-128	73.7625	86.9063	113.371	149.7	147.3	149.962	159.767		-128	2.76805	3.55733	4.47062	4.32457	1.63153	2.69878	2.70362	2.91259		-128	126.775	138.694	163.229	200.05	192.85	195.919	203.583		-128	130	120.8	114.3	128	137.8	130.9	134.8	117.6	144.8	135.4	149.15	136.6	147.4	120.5	148.8	126.9	167.6	147	187.4	162.1	153.6
-192	64.4625	74.1125	94.3286	120.85	116.8	118.883	131.758		-192	2.85694	3.13537	4.4789	5.31836	2.67804	3.57571	3.95653	3.59048		-192	117.475	125.9	144.186	171.2	162.35	164.84	175.575		-192	115.2	108.8	105.9	116.8	126.8	127.6	126.8	111.9	126.8	122	137.35	125.4	130.4	110.3	137.8	117.15	149.2	126.6	168.4	142.5	137
-256	53.175	58.5063	72.1143	87.75	84.15	85.1953	99.675		-256	3.48266	2.73734	4.38814	5.45092	3.33054	3.8962	4.93016	4.59739		-256	106.187	110.294	121.971	138.1	129.7	131.152	143.492		-256	98.4	95	94.9	103.6	112.4	123.6	116.8	104.8	106.4	107	121.95	110.2	111.2	98	122.2	105.4	125.6	104.2	146	120.7	116.6
-320	41.3125	42.7125	50.5857	56.7	54.85	54.5333	69.2		-320	4.25598	2.37465	4.01588	4.99068	3.51283	3.63917	5.31874	4.87869		-320	94.325	94.5	100.443	107.05	100.4	100.49	113.017		-320	82	82.6	82.3	90.2	97	117.9	106.2	96.4	87.8	92	105.3	94.2	92.8	85.65	105	93.25	101.4	84	122.8	99.5	96.6
-384	30.2625	28.7375	32.8429	31.55	32.5	30.281	44.175		-384	4.66207	2.02226	3.42982	3.95885	3.49884	3.06347	5.09794	4.19653		-384	83.275	80.525	82.7	81.9	78.05	76.2381	87.9917		-384	69.2	72.6	71.4	78	82.2	110.8	95	87	72.6	79.2	89.95	79.4	77.6	74.75	88.4	82.3	80.6	68.8	102	82.8	80.4
-448	20.95	18.0125	19.5714	14.1	17.45	13.7714	26.2917		-448	4.56751	1.61097	2.53407	2.77883	3.10725	2.4587	4.55059	3.0956		-448	73.9625	69.8	69.4286	64.45	63	59.7286	70.1083		-448	59.6	66.2	62.9	68.2	70.2	101.7	84.4	78.5	63	69.2	77.55	67.8	66.4	66.7	74.6	73.15	64.8	60	83.6	70.3	68
-512	13.8375	10.825	11	3.95	8.3	4.18329	15.2333		-512	4.03856	1.2836	1.79317	1.55	2.84814	2.03393	3.87454	1.91081		-512	66.85	62.6125	60.8571	54.3	53.85	50.1404	59.05		-512	54.2	62	57.1	62	61.4	91.8	75.4	70.9	57.8	62.8	68.6	59.4	59	61.5	65.6	66.2	54.8	54.6	69.6	62.5	60.8
-576	8.9375	6.46875	6.1	-0.65	3.45	-0.740429	8.975		-576	3.21325	1.12699	1.35554	0.756637	2.79016	1.87353	3.31768	1.37055		-576	61.95	58.2563	55.9571	49.7	49	45.2167	52.7917		-576	52.2	59.6	55.1	57.6	56.2	82.4	68	64.5	55.2	59.6	63	54	54.4	58.1	60.2	61.55	49	52.4	59.4	58.3	56.8
-640	5.9125	4.24375	3.27143	-2.1	0.85	-2.38329	5.725		-640	2.26576	1.14178	1.38132	1.01088	2.76134	1.83994	2.87809	1.83425		-640	58.925	56.0312	53.1286	48.25	46.4	43.5739	49.5417		-640	52.4	58.2	55.8	55.4	53.2	73.6	62.6	60.2	54.2	58.4	59.85	50.6	52	55.9	58.2	59.1	45.8	51.2	53.4	56.6	53.4
-704	4.225	3.025	1.84286	-1.65	-0.6	-2.24043	3.825		-704	1.47202	1.28555	1.51226	1.50748	2.73073	1.76073	2.4242	2.47871		-704	57.2375	54.8125	51.7	48.7	44.95	43.7167	47.6417		-704	54	57	57.8	54.2	51.8	66.5	59	57.6	54.2	57.6	57.6	48.2	50.2	54.1	58.2	58.4	45.2	49	50.4	56	51.4
-768	3.5625	2.025	0.942857	0	-1.65	-1.32857	2.21667		-768	1.03633	1.39022	1.5597	2.0092	2.42332	1.49048	2.07912	2.83374		-768	56.575	53.8125	50.8	50.35	43.9	44.6286	46.0333		-768	56.2	55.6	59.9	53.6	51.8	61.5	57.4	56.6	54.4	55.8	55.55	46.4	49.6	52.1	58.2	58.45	46	47	49.2	55.4	49
-832	3.15	1.0875	0.328571	1.9	-2.5	0.0857143	0.925		-832	1.02667	1.60731	1.6535	2.25541	1.95752	1.24505	1.85691	3.00165		-832	56.1625	52.875	50.1857	52.25	43.05	46.0429	44.7417		-832	58	54.8	61.3	53.2	51.4	58.1	56.8	55.7	54.4	54	53.35	45.2	48.2	50.05	58.6	59.2	47.6	44.4	49.6	54.2	46.6
-896	2.8875	-0.1625	0	3.25	-3.15	1.31671	-0.3		-896	0.99373	1.82455	1.717	2.36326	1.37659	1.08262	1.75344	2.93088		-896	55.9	51.625	49.8571	53.6	42.4	47.2739	43.5167		-896	59	54.2	61	53.4	51.8	56	56.8	55	53.8	51.2	51.3	44.2	46.4	48	58	60.1	49.8	42.4	51.4	52	44.8
-960	1.925	-1.525	-0.0571429	3.75	-3.3	2.04757	-0.916667		-960	0.93256	2.01084	1.84136	2.5025	0.804285	1.32276	1.89139	2.86887		-960	54.9375	50.2625	49.8	54.1	42.25	48.0047	42.9		-960	59.4	53	58.8	52.6	51.8	54.8	55.4	53.7	52.8	48.2	49.9	43.2	44.8	45.75	57.2	60.25	51.8	41.4	52.8	50.1	44
-1024	0.5375	-2.63125	0	3.5	-3.05	2.26671	-1.125		-1024	0.887764	2.08234	1.80779	2.59266	0.736546	1.66278	2.08075	2.75774		-1024	53.55	49.1562	49.8571	53.85	42.5	48.2239	42.6917		-1024	58.6	52.2	56.5	51.6	51.2	53.4	53.6	51.3	52.2	45	49.15	43	43.8	44.15	56.6	59.35	53.2	41.4	53.6	48.2	44.8
-1088	-0.9875	-3.1625	-0.0714286	2.55	-2.65	2.01429	-0.758333		-1088	0.864174	2.05882	1.57926	2.59374	1.14346	1.92796	2.18398	2.79829		-1088	52.025	48.625	49.7857	52.9	42.9	47.9714	43.0583		-1088	57	51	54.6	50.8	51	52.2	51	48.6	52.2	42.8	49.45	43	43.8	43.6	56.4	57.75	53.6	42.4	53.2	47.1	46.2
-1152	-2.4375	-3.21875	-0.5	0.95	-2.05	1.62857	0.0916667		-1152	1.00479	1.8786	1.29013	2.57148	1.40446	2.0922	2.15414	2.69957		-1152	50.575	48.5688	49.3571	51.3	43.5	47.5857	43.9083		-1152	55.2	50.2	53.8	49.6	51.4	50.3	48.8	45.3	52.4	41.8	50.4	44.2	45	43.3	55.8	55.65	53	43.4	51.6	46.5	47
-1216	-3.3625	-2.85	-0.885714	-0.75	-1.3	1.22614	1.24167		-1216	1.24449	1.61552	0.944309	2.53476	1.56105	2.07809	2.05441	2.40759		-1216	49.65	48.9375	48.9714	49.6	44.25	47.1833	45.0583		-1216	54	50.4	54.2	48	51.8	48.9	46.8	43.1	53.4	42.6	51.45	45.2	47.6	43.25	54.8	53.2	51.8	44.2	49.2	47.3	48.2
-1280	-3.675	-1.9625	-1.37143	-2.25	-0.3	1.08329	2.15833		-1280	1.44091	1.43058	0.857245	2.5045	1.40601	2.01017	1.73076	2.19789		-1280	49.3375	49.825	48.4857	48.1	45.25	47.0404	45.975		-1280	53.8	50.8	54.9	46.6	52.2	48.5	45.6	42.3	55.2	44.8	52.55	46.8	50.6	43.65	54.4	50.6	50.2	44.6	46.2	48.9	48.2
-1344	-3.2875	-1.14375	-1.52857	-3.35	0.75	0.914286	2.7		-1344	1.55491	1.43716	1.04836	2.60096	1.18427	1.92669	1.33758	2.17961		-1344	49.725	50.6438	48.3286	47	46.3	46.8714	46.5167		-1344	55.2	52.2	55.3	46.2	52.2	48.8	44.8	43.1	57	47.4	53.15	48	53.6	44.1	53.8	48.1	49	44.8	44.4	51.3	48
-1408	-2.5625	-0.5	-1.41429	-4	1.7	0.773857	2.825		-1408	1.58272	1.58308	1.40638	2.67149	0.967923	1.83938	1.04353	2.19891		-1408	50.45	51.2875	48.4429	46.35	47.25	46.731	46.6417		-1408	56.6	53.4	55.7	46.4	51.6	50.7	44.6	44.6	58.6	50.4	53.25	48.6	55.8	44.75	53	45.9	47.4	45.2	43.4	53.6	48
-1472	-1.725	-0.1375	-1.05714	-3.95	2.6	0.435714	2.29167		-1472	1.58128	1.79237	1.70749	2.77579	1.01088	1.70624	0.799168	2.42494		-1472	51.2875	51.65	48.8	46.4	48.15	46.3929	46.1083		-1472	58.4	54.6	54.7	47.6	50.2	53.6	44.6	46.6	59.6	52.2	53.4	48.4	57	45.35	53.2	44.05	46.8	45.6	43	55.9	48.6
-1536	-0.975	-0.0625	-0.657143	-3.55	3.55	0	1.225		-1536	1.66714	1.9369	1.87236	2.75227	1.35	1.61446	0.949592	2.45927		-1536	52.0375	51.725	49.2	46.8	49.1	45.9571	45.0417		-1536	58.8	55.2	53.4	48.8	49	58	45	48.1	59.4	53	54.2	48	57.8	45.55	53.2	42.65	46.2	46.2	43.8	57.1	49.6
-1600	-0.5375	0	-0.2	-2.7	4.2	-0.838143	0		-1600	1.85967	2.12137	1.81624	2.95751	1.69318	1.53488	1.41641	2.47806		-1600	52.475	51.7875	49.6571	47.65	49.75	45.119	43.8167		-1600	58.6	55.2	52.7	50	47.6	61.5	45.2	49	59.8	53.2	55.45	47	58	45.3	53.8	41.75	46.2	47	45.6	56.9	50.8
-1664	-0.2	0.03125	0.0714286	-1.85	4.2	-1.66429	-1.35		-1664	1.95356	2.22419	1.60137	3.17214	2.14869	1.36697	1.80272	2.47574		-1664	52.8125	51.8188	49.9286	48.5	49.75	44.2929	42.4667		-1664	57.4	55.4	52.4	50.4	47.4	64	46.2	49.3	59.6	53.2	56.65	46	57.8	44.9	54.8	41.6	47	47.2	47.8	56.4	51.2
-1728	-0.05	0.13125	0.342857	-0.6	4.1	-2.34757	-2.21667		-1728	1.88952	2.26521	1.24491	3.47734	2.38157	1.15997	2.05913	2.31683		-1728	52.9625	51.9187	50.2	49.75	49.65	43.6096	41.6		-1728	55.6	54.8	53.1	50.4	47.4	64.9	47.6	49.9	58.8	53.8	57.65	44.6	57	45.15	56.4	41.95	48.6	47.6	50.2	55.1	50.8
-1792	0.0375	0.35	0.557143	0.4	3.35	-3.131	-2.94167		-1792	1.74159	2.21777	0.936435	3.57168	2.3838	0.971539	2.01907	2.15956		-1792	53.05	52.1375	50.4143	50.75	48.9	42.8261	40.875		-1792	53.6	54	54.5	49.6	47.8	64.6	49.4	50.9	59	55	58.05	43.4	55.2	46.35	57	43.1	50.2	48	52.2	54.1	50.2
-1856	0	0.75625	0.5	1.2	2.35	-3.48571	-3.40833		-1856	1.66118	2.11862	0.777714	3.42591	2.21529	1.02832	1.83766	1.58193		-1856	53.0125	52.5438	50.3571	51.55	47.9	42.4714	40.4083		-1856	51.8	53.2	56.6	47.6	48.2	63.3	51.2	52.2	58.8	57	57.85	42.6	53.8	48.3	57.2	44.8	51.6	48.2	53.2	52.3	48.8
-1920	0.5	1.09375	0.214286	1.8	1.1	-3.60243	-3.73333		-1920	1.70948	2.01516	0.726949	2.92948	2.09329	1.43852	1.5199	1.60371		-1920	53.5125	52.8812	50.0714	52.15	46.65	42.3547	40.0833		-1920	51.6	52.6	58	45.6	49	62.2	53.6	55.5	59	58.8	57.65	42.6	51.8	50.55	56.2	46.45	52.6	48.2	52.8	50.6	47.6
-1984	0.8625	1.4875	0.0142857	1.9	0	-3.49043	-3.63333		-1984	1.91317	1.99693	0.672101	2.17414	1.90837	1.88521	1.26011	1.70935		-1984	53.875	53.275	49.8714	52.25	45.55	42.4667	40.1833		-1984	51.6	51.2	58.9	43.8	50.2	61.4	55.2	58.7	59.6	60.4	57.9	43.4	49.4	52.4	55	48.1	52.8	48	51.8	49.4	47.4
-2048	1.3125	1.70625	-0.442857	1.35	-0.7	-3.23329	-3.55833		-2048	2.2014	1.97483	0.648524	1.27377	1.94727	2.17971	1.06121	1.7621		-2048	54.325	53.4938	49.4143	51.7	44.85	42.7239	40.2583		-2048	51.6	50.2	59	42.4	51.8	61.2	56	62.4	59.4	61.4	58.85	45.2	47.6	53.45	53	49.05	52.4	47.2	50.6	48.5	47.4
-2112	1.6625	1.675	-0.585714	0.4	-1.25	-3.17386	-3.26667		-2112	2.3765	2.00766	0.70933	0.884237	2.09105	2.43638	1.06706	1.66189		-2112	54.675	53.4625	49.2714	50.75	44.3	42.7833	40.55		-2112	51.4	48.6	58.5	42.4	55	61.1	55.4	65	59.4	61.4	59.65	47.2	45.6	53.5	51.6	49.35	52.6	46	50	48.4	48.6
-2176	1.475	1.29375	-0.571429	-0.95	-1.2	-3.31671	-2.78333		-2176	2.45149	2.00523	0.868362	1.57797	2.2027	2.57034	1.30057	1.55403		-2176	54.4875	53.0812	49.2857	49.4	44.35	42.6404	41.0333		-2176	51	47.4	56.8	43	58.4	59.4	53.4	66.5	58.8	60.8	59.6	49.6	43.6	52.35	50.4	49.5	53.2	45.2	49.2	48.8	49.6
-2240	1.1375	0.7	-0.442857	-2.1	-1	-3.40714	-2.34167		-2240	2.56868	1.97978	1.01829	2.09329	2.2061	2.58273	1.70391	1.79774		-2240	54.15	52.4875	49.4143	48.25	44.55	42.55	41.475		-2240	50.4	46	54.9	44.4	61.8	57.7	51	67	57.8	59.8	58.7	51.8	42	50.5	49.8	49.5	53.8	44.8	49.6	49	50.6
-2304	0.45	0.16875	-0.3	-3	-0.7	-3.4	-1.68333		-2304	2.71477	1.86186	1.20879	2.28624	2.1603	2.48044	2.19059	2.26757		-2304	53.4625	51.9562	49.5571	47.35	44.85	42.5571	42.1333		-2304	49	45.4	53.5	46	64.6	55.1	47.6	66.5	56.4	58.8	56.7	54	41.6	48.4	50	49.75	54.4	44.2	50.8	50	51.2
-2368	-0.275	-0.625	-0.214286	-3	-0.15	-3.581	-0.916667		-2368	2.76309	1.78011	1.22389	2.0092	2.0137	2.34971	2.60088	2.7559		-2368	52.7375	51.1625	49.6429	47.35	45.4	42.3761	42.9		-2368	48.4	45.6	51.6	47.4	65.8	53.1	44.8	65.2	54.4	57.6	54.3	55	41	46.55	50.2	50.25	54.2	44.6	51.8	50.8	51.4
-2432	-0.6625	-1.14375	-0.685714	-2.4	0.2	-3.40714	-0.075		-2432	2.73124	1.69847	1.31082	1.65888	1.88994	2.20114	2.79176	3.05082		-2432	52.35	50.6437	49.1714	47.95	45.75	42.55	43.7417		-2432	48.2	46.8	51.2	48.6	66.2	51.6	42.6	63.6	52.8	56.2	52.5	55.4	40.8	45.55	51	50.9	53.8	43.6	52.4	51.2	50.4
-2496	-0.675	-1.49375	-1.3	-1.25	0.55	-3.29286	0.616667		-2496	2.6451	1.54081	1.38709	1.3537	1.80347	2.20673	2.74253	3.08008		-2496	52.3375	50.2938	48.5571	49.1	46.1	42.6643	44.4333		-2496	49	48.6	50.8	49.6	66.2	51.2	41.2	62.1	51.4	55.2	51.6	54.8	41.4	45.45	51.6	50.9	52.6	42.4	52.8	51.3	48.6
[truncated: 23 more columns]

## Sheet: Fig. 2 E Right
	Average	Average	Average	Average	Average	Average	Average		std error	std error	std error	std error	std error	std error	std error				Lattice On Rate 0.125x	Lattice On Rate 0.25x	Lattice On Rate 0.5x	Lattice On Rate 1x	Lattice On Rate 2x	Lattice On Rate 4x	Lattice On Rate 8x			On Rate	Tip/Lattice Intensity	Error				Individual Growth Events
position	Lattice On Rate 0.125x	Lattice On Rate 0.25x	Lattice On Rate 0.5x	Lattice On Rate 1x	Lattice On Rate 2x	Lattice On Rate 4x	Lattice On Rate 8x	position	Lattice On Rate 0.125x	Lattice On Rate 0.25x	Lattice On Rate 0.5x	Lattice On Rate 1x	Lattice On Rate 2x	Lattice On Rate 4x	Lattice On Rate 8x			Tip/Lattice	1.6677	1.80237	2.24562	2.94071	3.05435	2.98301	3.3456			0.00029572	1.6677	0.0678241				Position	Edge On Rate 0.18x growth1	Edge On Rate 0.18x growth2	Edge On Rate 0.18x growth3	Edge On Rate 0.18x growth4	Edge On Rate 0.18x growth5	Edge On Rate 0.18x growth6	Edge On Rate 0.18x growth7	Edge On Rate 0.18x growth8	Edge On Rate 0.35x growth1	Edge On Rate 0.35x growth2	Edge On Rate 0.35x growth3	Edge On Rate 0.35x growth4	Edge On Rate 0.35x growth5	Edge On Rate 0.35x growth6	Edge On Rate 0.35x growth7
2496	58.5125	68.7071	62.2857	73.45	61.95	53.0239	54.5833	2496	2.92155	3.33908	4.78533	0.319179	3.85057	3.62142	3.37757			Median in range behind tip	80.8	82.95	79.8571	75.9	73.6	76.0881	67.6833			0.00059144	1.80237	0.073179				2496	59.8	44.4	70.2	48.2	62.8	56.3	67.4	59	82.8	77.6		61.8	63	73.35	56
2432	57.85	68.0429	61.9143	72.95	63.45	53.5571	56.8667	2432	2.90291	3.22785	4.93502	1.08484	3.91304	3.70493	4.18348			Median Position	896	896	896	896	896	896	896			0.00118288	2.24562	0.0892927				2432	60.2	45.8	71.7	46.4	61	56.1	65	56.6	82.2	77		60.2	64.2	69.75	55.8
2368	57.8375	66.2938	61.7	72.5	64.8	53.8833	58.7333	2368	2.86078	3.01278	5.11752	1.67705	3.81314	3.79461	4.66166			Max	134.75	149.506	179.329	223.2	224.8	226.971	226.442			0.00236576	2.94071	0.0305792				2368	60	48.8	72.9	45.2	61.6	55.5	63	55.7	81	76.6	56.75	59.4	65.8	66.65	55.6
2304	58.5875	66.4625	61.6143	72.8	65.45	54.2214	59.9833	2304	2.82679	2.96342	5.413	2.04817	3.72383	3.83006	4.75654			Max position	0	0	0	0	0	0	0			0.00473152	3.05435	0.0655932				2304	59.6	53.4	73.9	44.8	63.6	55.2	62.4	55.8	80.4	76.4	58.9	58.6	67.6	64.1	55.2
2240	59.8125	66.85	61.8286	73.25	65.75	54.5047	60.5167	2240	2.84591	2.88603	5.52758	2.15682	3.49025	3.703	4.478													0.00946304	2.98301	0.0652536				2240	59	58.4	74.7	45.2	66.2	55.5	63	56.5	79.6	75.6	60.4	58.6	69.8	62.05	56
2176	61.3875	67.2063	62.1571	73.8	65.5	54.8453	60.2167	2176	2.87502	2.9052	5.45422	2.29674	3.52172	3.61292	3.95941			median error	2.64746	2.46214	2.38292	0.585235	1.42302	1.61542	2.00256			0.0189261	3.3456	0.101044				2176	58.2	64	75	46.2	68.8	56.8	64.2	57.9	79.4	75.4	61.15	59.2	70.8	60.3	56.8
2112	62.725	67.8062	62.7286	74	64.9	55.5286	59.6333	2112	2.8288	2.78136	5.4204	2.4779	3.65821	3.4076	3.4447			max error	3.24634	4.14179	4.71293	1.55724	2.10119	1.19603	1.37297									2112	57.6	67.6	74.7	47.8	70.8	59.1	65	59.2	79.2	74.8	61.25	61.2	71.6	59	59.4
2048	64.175	68.55	63.1714	73.95	64.45	56.4404	58.9083	2048	2.69286	2.67837	5.39379	2.76349	3.85641	3.06635	3.0481																			2048	57.8	71	73.7	49.6	71.4	62.2	66.8	60.9	80	73.8	60.9	64	71.4	58.45	62.6
1984	65.45	69.6812	63.6286	73.75	63.95	57.5047	58.3917	1984	2.44738	2.69309	5.37009	2.9482	4.01521	2.66782	2.69785																			1984	59	72	73	51.6	71.2	65.8	68.4	62.6	81.6	73.6	60.45	67	71.2	58.75	66.2
1920	66.925	70.75	64.3571	73.45	63.95	58.8643	58.025	1920	2.12447	2.7212	5.26993	2.96595	4.09046	2.24896	2.36994			propogated error	0.0678241	0.073179	0.0892927	0.0305792	0.0655932	0.0652536	0.101044									1920	61.6	71.4	72.1	54	71	70.4	70.4	64.5	83	72.2	60.25	70	70.6	59.85	69.8
1856	68.4625	71.8187	65.2286	73.25	63.9	60.4381	58.025	1856	1.91629	2.7758	4.92862	2.81991	3.94367	1.90342	2.08745																			1856	64.8	69	71.4	56.6	71.4	75.2	72.4	66.9	84	71.2	60.75	72.2	69.6	61.35	73.4
1792	69.6625	72.5125	66.2857	73	63.95	61.8643	58.6167	1792	1.9439	2.79034	4.37037	2.79553	3.57448	1.86457	2.08439																			1792	67.4	65.6	70.5	59.2	72.8	79.1	73	69.7	84.6	69.4	61.85	73	69.2	63.05	75.6
1728	70.675	72.8375	67.4286	73.05	63.7	63.319	59.4583	1728	2.15803	2.65534	3.60236	2.72431	3.07612	2.04499	2.2893																			1728	69.4	61.8	70	62.2	74.2	81.7	72.8	73.3	84.2	68.8	63.2	73	68.4	64.75	77
1664	71.225	72.975	68.7714	73.35	63.5	64.719	60.6	1664	2.41284	2.39177	2.70802	2.6827	2.70416	2.37428	2.71743																			1664	70.2	58.6	69.8	64.8	75.2	82.4	72.4	76.4	83.6	69.2	64.6	72	68.6	66.2	77.6
1600	71.45	72.8813	69.8857	73.6	63.7	65.6071	61.4667	1600	2.64622	2.02698	1.95171	2.59326	2.36379	2.52906	3.26																			1600	70.2	56.2	69.9	66.8	75.8	82.2	71.6	78.9	82.6	70.6	65.95	70.8	68.4	67.85	77
1536	71.3375	73.1875	70.9429	73.65	64.15	66.2381	62.3333	1536	2.77775	1.74707	1.50399	2.417	2.308	2.50235	3.73375																			1536	70.2	54.8	70.2	67.8	74.2	81.7	71	80.8	82.8	73.6	67.4	70	69	69.25	76
1472	71.325	73.5062	71.7714	74.4	65.45	66.6833	62.6833	1472	2.82825	1.77976	1.38471	2.13659	2.17758	2.42248	4.16521																			1472	70.4	54.8	71.2	68.4	71.6	82.3	70.2	81.7	84.2	76.4	68.7	69.8	68.4	70.15	75
1408	71.65	73.8875	72.2	75.45	66.65	67.0261	62.7417	1408	2.87875	1.90949	1.27663	1.83354	2.02407	2.35962	4.27363																			1408	72	55.8	72.8	68.2	69.4	83.8	69.2	82	85.2	79.4	69.9	70.2	67.8	71.05	74.2
1344	72.0125	74.3813	72.6143	76.8	68	67.7643	62.8583	1344	2.85473	2.03057	1.28546	1.79165	2.05305	2.47479	4.29574																			1344	73.8	58.6	74	68	67	85.5	67.6	81.6	85.8	81.8	71.45	71.2	68	71.35	74.2
1280	72.725	74.8875	73.1571	77.95	69.05	68.8404	63	1280	2.85459	2.01506	1.41362	1.81573	2.12529	2.66229	4.09152																			1280	76.8	62.4	75	67.2	66.4	87.4	66	80.6	84.8	83.8	73.4	72.6	69.2	71.1	74.6
1216	73.9125	75.725	73.7	78.75	69.8	70.3119	63.1917	1216	2.82508	1.94924	1.51926	1.79496	2.37592	2.70736	3.65442																			1216	80	67	75.9	66.6	67.8	88.6	65.2	80.2	83	85.8	75.35	74.2	71.6	70.9	76
1152	75.3375	76.8875	74.4714	78.85	70.4	71.6381	63.85	1152	2.85312	1.83662	1.64288	1.7441	2.48495	2.5275	3.10624																			1152	83	72	76.3	66	70.4	89.4	64.8	80.8	80.6	87.6	76.75	76.8	74.8	70.8	77.6
1088	76.85	78.2938	75.3	78.25	71.15	72.8333	64.7	1088	2.88828	1.78534	1.77431	1.38992	2.40455	2.21892	2.66531																			1088	86	76.6	76.6	65.8	72.6	89.2	65.6	82.4	78.4	89.4	77.95	79.8	77.8	70.85	78.6
1024	78.375	79.7625	76.4571	77.35	71.85	73.9596	65.6917	1024	2.85667	1.90548	1.91395	0.875714	2.19815	1.88274	2.21881																			1024	89	80	77.2	66.6	74.6	87.8	67.2	84.6	77.2	91.6	79.2	82.2	79.8	71.05	79
960	79.675	81.375	77.9857	76.55	72.55	74.8643	66.7583	960	2.78521	2.15142	2.14632	0.588961	1.92922	1.72286	2.03348																			960	91.6	82.2	77.8	68.4	75.8	85.8	69	86.8	78	94.4	80.65	83.6	81	71.25	79.2
896	80.8	82.95	79.8571	75.9	73.6	76.0881	67.6833	896	2.64746	2.46214	2.38292	0.585235	1.42302	1.61542	2.00256																			896	94	83.4	78.2	71.6	76.6	83.3	71	88.3	80	97.4	83.05	84.4	81.6	71.3	79
832	81.8625	84.4188	82.0143	75.55	75	77.2761	68.625	832	2.43702	2.70696	2.7666	0.701338	0.982344	1.62404	1.98997																			832	95.8	83.6	78.8	76	77.4	81.6	73.2	88.5	83.2	99.8	86.45	84.2	81.8	71.2	79.6
768	83.0125	85.875	84.1286	75.15	76.25	78.9047	69.7667	768	2.23903	2.9056	3.19392	0.672216	0.788591	1.86126	1.94674																			768	97	83.8	78.9	82	78.8	80	75.6	88	87	101.2	90.95	83.2	82.6	71.05	81
704	84.475	87.6375	86.4429	75.25	78.05	81.181	71.4833	704	2.06668	3.09814	3.63508	0.580409	0.725862	2.47157	2.04836																			704	97	84	79.2	88.2	81.2	79.8	78.8	87.6	91.2	102	96.25	82.6	84.4	71.3	83.8
640	86.3625	89.7188	88.8857	76.6	80.2	84.2596	73.9333	640	1.98651	3.20023	4.20284	0.489898	0.696419	3.33432	2.16627																			640	96.6	84.8	80.2	94	84.8	81.2	82	87.3	94.6	101.8	101.75	83.2	87.4	72.75	88
576	88.8	92.4062	92.1571	79.45	84	88.7239	78.0833	576	2.06193	3.30592	4.77544	0.613901	0.689202	4.19607	1.98748																			576	96.8	85.4	81.9	99.2	90	83.2	86.2	87.7	98.2	101.8	107	84.8	91.6	75.85	93.2
512	92.1125	95.7937	96.6571	85.15	89.75	95.4453	84.375	512	2.24259	3.36429	5.37621	1.43069	0.936416	4.94226	1.55928																			512	98.6	87	84.6	104.2	95.6	86.6	90.8	89.5	102.6	102.2	111.2	88.2	96.6	80.8	99.2
448	95.975	100.338	102.929	94.45	99.15	105.393	93.5083	448	2.36714	3.36358	5.73235	2.58396	1.84306	5.50169	0.9911																			448	101.6	88.8	88.3	108.2	101.4	91.3	96.2	92	107.2	104.8	114.35	93.6	103.8	87.75	105.6
384	100.975	106.369	111.557	107.85	113.35	119.395	106.742	384	2.47801	3.36351	5.90634	3.83169	3.00031	5.71247	0.99306																			384	106.6	92	93	112.6	107.6	97.6	102.4	96	113.4	109.4	117.3	99.8	112.4	96.45	113.6
320	106.725	114.069	122.514	125.6	132.6	137.905	124.85	320	2.59475	3.38091	5.83331	4.85747	4.24912	5.6277	1.7438																			320	113	96.2	97.8	117	114	105.5	109.4	100.9	121.6	115.8	120.65	107	123.4	105.9	122.8
256	113.625	122.956	135.757	147.4	156.05	160.26	147.525	256	2.74031	3.47031	5.64883	5.42817	5.21266	5.2202	2.54094																			256	121.2	102.4	103	122	120.8	114.8	117.8	107	132.2	123.8	125.8	115.2	135	114.55	132
192	120.975	132.475	149.971	171.55	181.4	184.283	173.2	192	2.93475	3.74604	5.47882	5.35648	5.38609	4.50083	3.06195																			192	130.2	110.2	108.6	127.4	128.4	123.1	126.8	113.1	143.8	133	133.45	123.8	147.2	121.8	141.2
128	127.825	141	163.943	195.4	204.55	206.469	198.233	128	3.18619	3.97257	5.30013	4.38577	4.76045	3.4317	2.98977																			128	138.6	118.8	113.8	133.2	135.8	130.2	134.8	117.4	154.2	141.2	142.35	131.8	157	127.25	148.8
64	132.775	147.181	174.729	214.4	220.4	222.512	217.625	64	3.25032	4.1202	5.05951	2.91376	3.50286	2.19086	2.31798																			64	144	126.2	118.2	137.4	141.8	133.9	139.8	120.9	161.4	146.6	150.65	139	163.4	130.25	153.6
0	134.75	149.506	179.329	223.2	224.8	226.971	226.442	0	3.24634	4.14179	4.71293	1.55724	2.10119	1.19603	1.37297																			0	145.2	130	120.3	138.4	145	134.8	142.2	122.1	162.8	147.8	155.75	143.2	164.6	130.4	156.2
-64	132.65	146.812	175.671	218.45	215.05	217.955	221.817	-64	3.0039	3.95568	4.4781	2.59651	1.0963	1.5712	1.50724																			-64	140.2	128.2	119.4	135.6	143.8	133.4	139.8	120.8	157.6	143.8	155.5	142.8	159.2	127.25	155
-128	126.775	138.694	163.229	200.05	192.85	195.919	203.583	-128	2.76805	3.55733	4.47062	4.32457	1.63153	2.69878	2.70362																			-128	130	120.8	114.3	128	137.8	130.9	134.8	117.6	144.8	135.4	149.15	136.6	147.4	120.5	148.8
-192	117.475	125.9	144.186	171.2	162.35	164.84	175.575	-192	2.85694	3.13537	4.4789	5.31836	2.67804	3.57571	3.95653																			-192	115.2	108.8	105.9	116.8	126.8	127.6	126.8	111.9	126.8	122	137.35	125.4	130.4	110.3	137.8
-256	106.187	110.294	121.971	138.1	129.7	131.152	143.492	-256	3.48266	2.73734	4.38814	5.45092	3.33054	3.8962	4.93016																			-256	98.4	95	94.9	103.6	112.4	123.6	116.8	104.8	106.4	107	121.95	110.2	111.2	98	122.2
-320	94.325	94.5	100.443	107.05	100.4	100.49	113.017	-320	4.25598	2.37465	4.01588	4.99068	3.51283	3.63917	5.31874																			-320	82	82.6	82.3	90.2	97	117.9	106.2	96.4	87.8	92	105.3	94.2	92.8	85.65	105
-384	83.275	80.525	82.7	81.9	78.05	76.2381	87.9917	-384	4.66207	2.02226	3.42982	3.95885	3.49884	3.06347	5.09794																			-384	69.2	72.6	71.4	78	82.2	110.8	95	87	72.6	79.2	89.95	79.4	77.6	74.75	88.4
-448	73.9625	69.8	69.4286	64.45	63	59.7286	70.1083	-448	4.56751	1.61097	2.53407	2.77883	3.10725	2.4587	4.55059																			-448	59.6	66.2	62.9	68.2	70.2	101.7	84.4	78.5	63	69.2	77.55	67.8	66.4	66.7	74.6
-512	66.85	62.6125	60.8571	54.3	53.85	50.1404	59.05	-512	4.03856	1.2836	1.79317	1.55	2.84814	2.03393	3.87454																			-512	54.2	62	57.1	62	61.4	91.8	75.4	70.9	57.8	62.8	68.6	59.4	59	61.5	65.6
-576	61.95	58.2563	55.9571	49.7	49	45.2167	52.7917	-576	3.21325	1.12699	1.35554	0.756637	2.79016	1.87353	3.31768																			-576	52.2	59.6	55.1	57.6	56.2	82.4	68	64.5	55.2	59.6	63	54	54.4	58.1	60.2
-640	58.925	56.0312	53.1286	48.25	46.4	43.5739	49.5417	-640	2.26576	1.14178	1.38132	1.01088	2.76134	1.83994	2.87809																			-640	52.4	58.2	55.8	55.4	53.2	73.6	62.6	60.2	54.2	58.4	59.85	50.6	52	55.9	58.2
-704	57.2375	54.8125	51.7	48.7	44.95	43.7167	47.6417	-704	1.47202	1.28555	1.51226	1.50748	2.73073	1.76073	2.4242																			-704	54	57	57.8	54.2	51.8	66.5	59	57.6	54.2	57.6	57.6	48.2	50.2	54.1	58.2
-768	56.575	53.8125	50.8	50.35	43.9	44.6286	46.0333	-768	1.03633	1.39022	1.5597	2.0092	2.42332	1.49048	2.07912																			-768	56.2	55.6	59.9	53.6	51.8	61.5	57.4	56.6	54.4	55.8	55.55	46.4	49.6	52.1	58.2
-832	56.1625	52.875	50.1857	52.25	43.05	46.0429	44.7417	-832	1.02667	1.60731	1.6535	2.25541	1.95752	1.24505	1.85691																			-832	58	54.8	61.3	53.2	51.4	58.1	56.8	55.7	54.4	54	53.35	45.2	48.2	50.05	58.6
-896	55.9	51.625	49.8571	53.6	42.4	47.2739	43.5167	-896	0.99373	1.82455	1.717	2.36326	1.37659	1.08262	1.75344																			-896	59	54.2	61	53.4	51.8	56	56.8	55	53.8	51.2	51.3	44.2	46.4	48	58
-960	54.9375	50.2625	49.8	54.1	42.25	48.0047	42.9	-960	0.93256	2.01084	1.84136	2.5025	0.804285	1.32276	1.89139																			-960	59.4	53	58.8	52.6	51.8	54.8	55.4	53.7	52.8	48.2	49.9	43.2	44.8	45.75	57.2
-1024	53.55	49.1562	49.8571	53.85	42.5	48.2239	42.6917	-1024	0.887764	2.08234	1.80779	2.59266	0.736546	1.66278	2.08075																			-1024	58.6	52.2	56.5	51.6	51.2	53.4	53.6	51.3	52.2	45	49.15	43	43.8	44.15	56.6
-1088	52.025	48.625	49.7857	52.9	42.9	47.9714	43.0583	-1088	0.864174	2.05882	1.57926	2.59374	1.14346	1.92796	2.18398																			-1088	57	51	54.6	50.8	51	52.2	51	48.6	52.2	42.8	49.45	43	43.8	43.6	56.4
-1152	50.575	48.5688	49.3571	51.3	43.5	47.5857	43.9083	-1152	1.00479	1.8786	1.29013	2.57148	1.40446	2.0922	2.15414																			-1152	55.2	50.2	53.8	49.6	51.4	50.3	48.8	45.3	52.4	41.8	50.4	44.2	45	43.3	55.8
-1216	49.65	48.9375	48.9714	49.6	44.25	47.1833	45.0583	-1216	1.24449	1.61552	0.944309	2.53476	1.56105	2.07809	2.05441																			-1216	54	50.4	54.2	48	51.8	48.9	46.8	43.1	53.4	42.6	51.45	45.2	47.6	43.25	54.8
-1280	49.3375	49.825	48.4857	48.1	45.25	47.0404	45.975	-1280	1.44091	1.43058	0.857245	2.5045	1.40601	2.01017	1.73076																			-1280	53.8	50.8	54.9	46.6	52.2	48.5	45.6	42.3	55.2	44.8	52.55	46.8	50.6	43.65	54.4
-1344	49.725	50.6438	48.3286	47	46.3	46.8714	46.5167	-1344	1.55491	1.43716	1.04836	2.60096	1.18427	1.92669	1.33758																			-1344	55.2	52.2	55.3	46.2	52.2	48.8	44.8	43.1	57	47.4	53.15	48	53.6	44.1	53.8
-1408	50.45	51.2875	48.4429	46.35	47.25	46.731	46.6417	-1408	1.58272	1.58308	1.40638	2.67149	0.967923	1.83938	1.04353																			-1408	56.6	53.4	55.7	46.4	51.6	50.7	44.6	44.6	58.6	50.4	53.25	48.6	55.8	44.75	53
-1472	51.2875	51.65	48.8	46.4	48.15	46.3929	46.1083	-1472	1.58128	1.79237	1.70749	2.77579	1.01088	1.70624	0.799168																			-1472	58.4	54.6	54.7	47.6	50.2	53.6	44.6	46.6	59.6	52.2	53.4	48.4	57	45.35	53.2
-1536	52.0375	51.725	49.2	46.8	49.1	45.9571	45.0417	-1536	1.66714	1.9369	1.87236	2.75227	1.35	1.61446	0.949592																			-1536	58.8	55.2	53.4	48.8	49	58	45	48.1	59.4	53	54.2	48	57.8	45.55	53.2
-1600	52.475	51.7875	49.6571	47.65	49.75	45.119	43.8167	-1600	1.85967	2.12137	1.81624	2.95751	1.69318	1.53488	1.41641																			-1600	58.6	55.2	52.7	50	47.6	61.5	45.2	49	59.8	53.2	55.45	47	58	45.3	53.8
-1664	52.8125	51.8188	49.9286	48.5	49.75	44.2929	42.4667	-1664	1.95356	2.22419	1.60137	3.17214	2.14869	1.36697	1.80272																			-1664	57.4	55.4	52.4	50.4	47.4	64	46.2	49.3	59.6	53.2	56.65	46	57.8	44.9	54.8
-1728	52.9625	51.9187	50.2	49.75	49.65	43.6096	41.6	-1728	1.88952	2.26521	1.24491	3.47734	2.38157	1.15997	2.05913																			-1728	55.6	54.8	53.1	50.4	47.4	64.9	47.6	49.9	58.8	53.8	57.65	44.6	57	45.15	56.4
-1792	53.05	52.1375	50.4143	50.75	48.9	42.8261	40.875	-1792	1.74159	2.21777	0.936435	3.57168	2.3838	0.971539	2.01907																			-1792	53.6	54	54.5	49.6	47.8	64.6	49.4	50.9	59	55	58.05	43.4	55.2	46.35	57
-1856	53.0125	52.5438	50.3571	51.55	47.9	42.4714	40.4083	-1856	1.66118	2.11862	0.777714	3.42591	2.21529	1.02832	1.83766																			-1856	51.8	53.2	56.6	47.6	48.2	63.3	51.2	52.2	58.8	57	57.85	42.6	53.8	48.3	57.2
-1920	53.5125	52.8812	50.0714	52.15	46.65	42.3547	40.0833	-1920	1.70948	2.01516	0.726949	2.92948	2.09329	1.43852	1.5199																			-1920	51.6	52.6	58	45.6	49	62.2	53.6	55.5	59	58.8	57.65	42.6	51.8	50.55	56.2
-1984	53.875	53.275	49.8714	52.25	45.55	42.4667	40.1833	-1984	1.91317	1.99693	0.672101	2.17414	1.90837	1.88521	1.26011																			-1984	51.6	51.2	58.9	43.8	50.2	61.4	55.2	58.7	59.6	60.4	57.9	43.4	49.4	52.4	55
-2048	54.325	53.4938	49.4143	51.7	44.85	42.7239	40.2583	-2048	2.2014	1.97483	0.648524	1.27377	1.94727	2.17971	1.06121																			-2048	51.6	50.2	59	42.4	51.8	61.2	56	62.4	59.4	61.4	58.85	45.2	47.6	53.45	53
-2112	54.675	53.4625	49.2714	50.75	44.3	42.7833	40.55	-2112	2.3765	2.00766	0.70933	0.884237	2.09105	2.43638	1.06706																			-2112	51.4	48.6	58.5	42.4	55	61.1	55.4	65	59.4	61.4	59.65	47.2	45.6	53.5	51.6
-2176	54.4875	53.0812	49.2857	49.4	44.35	42.6404	41.0333	-2176	2.45149	2.00523	0.868362	1.57797	2.2027	2.57034	1.30057																			-2176	51	47.4	56.8	43	58.4	59.4	53.4	66.5	58.8	60.8	59.6	49.6	43.6	52.35	50.4
-2240	54.15	52.4875	49.4143	48.25	44.55	42.55	41.475	-2240	2.56868	1.97978	1.01829	2.09329	2.2061	2.58273	1.70391																			-2240	50.4	46	54.9	44.4	61.8	57.7	51	67	57.8	59.8	58.7	51.8	42	50.5	49.8
-2304	53.4625	51.9562	49.5571	47.35	44.85	42.5571	42.1333	-2304	2.71477	1.86186	1.20879	2.28624	2.1603	2.48044	2.19059																			-2304	49	45.4	53.5	46	64.6	55.1	47.6	66.5	56.4	58.8	56.7	54	41.6	48.4	50
-2368	52.7375	51.1625	49.6429	47.35	45.4	42.3761	42.9	-2368	2.76309	1.78011	1.22389	2.0092	2.0137	2.34971	2.60088																			-2368	48.4	45.6	51.6	47.4	65.8	53.1	44.8	65.2	54.4	57.6	54.3	55	41	46.55	50.2
-2432	52.35	50.6437	49.1714	47.95	45.75	42.55	43.7417	-2432	2.73124	1.69847	1.31082	1.65888	1.88994	2.20114	2.79176																			-2432	48.2	46.8	51.2	48.6	66.2	51.6	42.6	63.6	52.8	56.2	52.5	55.4	40.8	45.55	51
-2496	52.3375	50.2938	48.5571	49.1	46.1	42.6643	44.4333	-2496	2.6451	1.54081	1.38709	1.3537	1.80347	2.20673	2.74253																			-2496	49	48.6	50.8	49.6	66.2	51.2	41.2	62.1	51.4	55.2	51.6	54.8	41.4	45.45	51.6
[truncated: 29 more columns]

## Sheet: Fig 2.G
average	run1	0.125	0.25	0.5	1	2	4	8		run2	0.125	0.25	0.5	1	2	4	8														run1 individuals
Position	position	6:1 average	12:1 average	25:1 average	50:1 average	100:1 average	200:1 average	400:1 average		position	400:1 aveag	200:1 averag	100:1 average	50:1 average	25:1 average	12:1 average	6:1 average			tip/lattice	6 to 1	12 to 1	25 to 1	50 to 1	100 to 1	200 to 1	400 to 1				Position	6:1 growth1	6:1 growth2	6:1 growth3	6:1 growth4	6:1 growth5	6:1 growth6	6:1 growth7	6:1 growth8	6:1 growth9	6:1 growth10	6:1 growth11	12:1 growth1	12:1 growth2	12:1 growth3	12:1 growth4	12:1 growth5	12:1 growth6	25:1 growth1
	2496	61.2773	52.1417	71.15	64	55.6077	54.0167	53.3638		2496	51.3833	52.0444	55.2	50.5	56.85	55.1143	48.9			run1	1.83533	2.22653	2.23643	2.71718	2.84542	2.90332	3.28441				2496	54	67.75	59.2	67.5	56.4	57.15	69.8	66.45	51.6	54.6	69.6	45.2	71.25	40	51.8	47.4	57.2	75.6
	2432	61.45	53.0083	71.15	64.28	56	54.9917	54.1895		2432	52.2429	51.7111	55.54	51.9	59.425	56.4	52.4333			run2	1.70197	2.02774	2.29104	2.48161	2.94924	3.26319	3.36857				2432	53.2	65.85	59	68.6	55.6	57	71.8	64.3	50.6	55.4	74.6	44.6	72.85	39	53.2	48.6	59.8	77.6
	2368	61.3545	54.0583	71.575	63.3667	56.6852	56.1583	53.0343		2368	52.3286	51.5556	55.2545	53.2333	62.2	57.9143	55.7333			average	1.76865	2.12713	2.26374	2.59939	2.89733	3.08325	3.32649				2368	52	63.75	58.4	68.5	55	57.75	72.8	62.1	49.2	57	78.4	44.2	74.15	39.2	55	50.2	61.6	78.2
	2304	61.2727	55.6917	72.1167	64.1333	57.7277	55.7	53.3371		2304	53.5467	51.4222	55.4	56.3143	65.025	59.4286	58.9														2304	50.6	61.9	58.2	67.5	55.6	59.1	72.8	60	48.4	58.5	81.4	44.8	75.75	40.6	56.8	53.6	62.6	77.2
	2240	60.8227	57.625	72.8333	65.4167	59.0605	56.3786	51.1361		2240	53.7333	51.4444	55.8727	57.0286	67.6	60.8286	61.5667														2240	49.2	60.55	57.8	64.6	56.2	60.4	71.6	57.8	47.6	61.1	82.2	45.4	77.75	42.8	57.8	58	64	76
	2176	60.5773	59.9833	73.5667	66.875	59.7163	56.9929	51.22		2176	54.04	51.74	56.2364	56.075	70.025	62.2857	63.4667														2176	48.2	59.9	58.2	61.6	57.2	61.25	70.8	56.1	48	63.3	81.8	47	79.9	45.8	57.6	63.6	66	74.4
	2112	60.5545	62.7167	74.1833	68.4	60.6797	56.2437	51.3293		2112	54.4133	52.3818	56.8727	56.25	72.025	63.4857	64.6333														2112	48	60.3	58.6	59	58.4	61.25	70.4	55.25	49	65.1	80.8	49	81.9	49.6	56.6	70.4	68.8	73.2
	2048	60.7136	65.0667	74.2667	69.3917	61.355	57.1375	51.557		2048	54.6533	53.1273	57.6727	56.75	73.65	64.3714	65.4333														2048	47.8	61.65	58.8	56.9	59.4	59.95	71	55.05	50.8	66.9	79.6	50.8	83.4	53.4	55.2	76.2	71.4	71.6
	1984	61.3318	67.0917	73.9917	70.05	61.8221	58.4188	51.6998		1984	54.8933	53.8182	58.4	58.025	74.975	65.3429	65.9														1984	48.6	63.6	59.4	56.2	59.8	57.95	73	55.3	52.8	69	79	52.6	84.35	57.2	54	80.8	73.6	70.2
	1920	62.1182	68.2083	73.1	70.525	61.9107	59.7062	51.9186		1920	54.8267	54.1273	59.4727	60.125	76.025	66.3714	66.5667														1920	50	65.7	60.2	56.3	59.4	55.9	74.8	55.7	55.4	70.7	79.2	53.4	84.45	60.2	53.2	84.2	73.8	68.8
	1856	62.8636	69.0667	71.75	70.775	61.8979	61.1437	52.2996		1856	54.84	54.2364	60.4545	62.575	76.975	67.5143	67.3667														1856	51.4	67.65	61.8	56.6	58.2	54.1	76.6	56.25	57.6	72.3	79	53.4	83.8	64	53.8	86	73.4	67.8
	1792	63.6773	69.6417	70.3583	70.9583	62.2131	62.225	52.6691		1792	54.8667	54.2545	61.5091	65.325	78.05	68.8571	68.9333														1792	52.8	69.45	63.6	57.1	57.2	52.75	77.2	57.35	60	73.8	79.2	53.4	82.65	67	55.6	87	72.2	67
	1728	64.4091	70.0083	69.1417	71.3833	62.8361	62.975	53.4258		1728	54.7867	54.1273	62.5818	67.925	79.25	70.0857	71.0667														1728	52.8	70.8	66.2	57.9	56.2	52.7	76.8	59.1	62.8	74.2	79	52.4	81.05	70	59.4	87.6	69.6	66.2
	1664	65.3045	70.6083	68.5417	71.95	63.7064	63.3688	54.2395		1664	54.76	54.0909	63.4727	70.325	80.525	71.4	73.5667														1664	52.4	71.55	68.8	58.6	56.4	54.35	76.4	61.45	64.8	75.2	78.4	52.2	79.25	72.4	64.2	87.8	67.8	66
	1600	66.2636	71.1583	68.1417	72.55	64.5993	63.5063	55.5844		1600	54.7867	54.1636	63.8909	72.1	81.975	73.0286	76.5333														1600	51.2	71.85	71.2	59.5	57.8	57.65	76	64	66.2	74.9	78.6	52.6	77.35	74.2	69.4	87.2	66.2	65
	1536	67.5	71.8333	68.1917	73.3667	65.457	63.675	57.1581		1536	54.8533	54.4364	64.1091	73.825	83.55	75.0857	79.5333														1536	50.2	71.9	73.8	60.6	60.4	62.05	76.4	66.55	67	74.8	78.8	54.2	75.8	75.2	73.8	86.2	65.8	63.6
	1472	68.9136	72.9083	69	74.4583	66.3089	64.0813	59.0116		1472	54.8533	54.8545	64.1091	75.375	85.15	77.8571	82.8333														1472	51	72.2	75.8	62.2	63.8	66.65	77.4	69.1	67	74.3	78.6	56.8	74.65	76	78.4	84.8	66.8	63
	1408	70.7545	73.9083	70.2667	75.8	67.3249	64.6625	60.7579		1408	55	55.2545	64.1818	76.725	86.725	81.7143	86.5														1408	54	73.15	77.6	64.5	67.2	70.6	79.4	71.75	67.2	73.7	79.2	60.4	73.65	76.6	81.2	82.8	68.8	62.8
	1344	72.8591	74.625	72.5	77.4167	68.4221	65.7062	62.2901		1344	55.16	56.0182	64.2364	78.25	88.35	86.5429	90.9														1344	58.6	74.5	78.8	67.6	71.2	73.25	82	75.2	67.4	73.5	79.4	64.2	72.95	77	83.4	80	70.2	64.2
	1280	75.2318	75.1333	75.6667	79.075	69.6137	66.9812	63.45		1280	55.4933	57.0182	64.3818	79.825	90	91.7429	96.1333														1280	64.2	76.6	79.8	71.1	75.6	74.7	84.4	78.95	68.2	74.8	79.2	67.8	72.4	77	84.2	77.6	71.8	67.2
	1216	77.6955	75.4917	79.15	80.6	70.7287	68.4438	63.928		1216	56.2533	58.4	64.9636	81.375	91.55	96.6857	102.367														1216	69.4	79.65	80	74.2	81.2	75.3	86.6	82.7	69.4	76.4	79.8	70.8	71.75	77	84.8	75.8	72.8	70.8
	1152	80.3864	76.0333	82.9417	81.5667	71.6677	70.1188	64.2366		1152	57.1733	60.0909	65.9273	83.05	93.075	101.171	109.1														1152	73	83.15	80.6	77.5	88	75.5	87.8	86.3	72	79	81.4	73.8	71.4	77.2	85.4	74.8	73.6	75.2
	1088	82.9773	77.1333	86.4833	82.0167	72.6836	71.825	64.5096		1088	58.08	61.7636	67.3818	84.525	94.625	104.743	115.867														1088	75	86.95	80.4	79.7	96.4	76.05	88.4	89.05	75.2	81.2	84.4	76.8	71.8	78	86.4	75.2	74.6	78.8
	1024	85.3545	78.525	89.6583	82.4083	73.794	73.6062	65.1569		1024	59.0133	63.3455	69.0545	86.125	96.225	107.457	122.5														1024	75.8	90.55	81.2	81	104	77.1	88.8	90.65	78.8	82.8	88.2	79.4	72.55	79.2	89	75.8	75.2	82.6
	960	87.0636	80.15	92.375	83.0417	76.0247	75.65	66.4267		960	59.9867	65	71.2909	87.65	97.975	110.086	128.467														960	75.8	93.6	82.2	81.3	109.6	78.75	88.8	90.85	81.8	83.4	91.6	81.4	73.1	82	92	76	76.4	85
	896	88.1955	82.0333	94.8833	83.5917	78.9347	77.9	68.2964		896	60.92	66.5273	73.7818	89.025	99.9	112.286	133.767														896	76.6	95.95	83.8	81.3	112.4	81.45	87.8	89.75	83	83.7	94.4	83.2	73.6	85.6	95.6	76.8	77.4	87.6
	832	88.95	83.65	97.275	85.0167	83.1664	80.1875	70.8669		832	62.08	68.0545	76.7455	90.475	101.875	114.629	138.4														832	77.6	97.7	87	81	111.4	84.65	87.6	88.3	83	84.2	96	84.4	74.3	89.4	99	77.2	77.6	89.8
	768	90.1091	85.5583	99.5583	87.3	88.459	82.875	74.0484		768	63.4533	69.7636	79.6545	92.175	104.325	117.4	142.933														768	79.6	99.75	92.8	81.4	108.8	88.7	87	87.75	82.2	85.6	97.6	85.6	75.35	94.2	102.2	78	78	92
	704	91.9273	87.6167	101.983	90.75	94.5456	85.7563	77.8016		704	64.9867	71.8364	83.1636	94.45	107.325	121	147.333														704	82	102	99	81.4	107.2	93.8	87.6	89.2	81.4	88.6	99	87.6	77.1	98.2	104.8	79.2	78.8	94.6
	640	94.7091	90.4083	104.675	95.45	101.034	89.5438	82.4876		640	67.1333	74.7636	87.1636	97.55	111.2	125.743	151.933														640	85.4	104.1	106.6	81.8	107.4	99.35	89.4	92.65	81.4	93.1	100.6	91.2	80.25	102.6	105.8	81.2	81.4	97.8
	576	98.6864	94.275	108.267	101.517	108.114	94.5938	88.5049		576	70.3333	79.1091	92	102.1	116.7	131.629	156.867														576	89.2	106.05	114.6	82.7	111	105.05	94.2	97.45	83.6	99.1	102.6	96	85.45	106.6	106.4	84	87.2	103.4
	512	103.786	99.9	113.333	109.425	115.782	101.656	96.6088		512	75.3733	85.7455	98.4909	108.65	124.2	138.971	161.9														512	93.6	108	123.2	84.5	117.8	111.45	100.6	103.2	87.6	105.7	106	103.2	92.8	110.2	108.6	89.4	95.2	110.6
	448	109.873	107.358	120.667	119.667	124.871	111.619	107.316		448	83.7733	95.6909	107.618	118	133.8	147.686	168.167														448	99.4	110.85	131.4	88	126.4	118.15	109.6	109.3	93.6	111.7	110.2	112.4	102.35	114.2	113	95.8	106.4	121.4
	384	116.864	117.242	131.117	132.6	136.382	125.025	121.343		384	96.5733	109.491	119.945	130.625	146.225	158.286	175.567														384	106.6	115.05	140.4	92.5	136	125	119.6	115.05	102.2	116.7	116.4	123	114.05	120.2	121.8	105	119.4	134.8
	320	124.968	129.567	144.925	149.025	150.722	142.25	139.293		320	114.36	127.782	136.109	146.525	161.025	170.771	184.5														320	116.2	120.85	149	99.6	145	132.85	129.8	120.65	113.6	122.7	124.4	134.6	127.6	129.6	135.4	117.2	133	151.4
	256	134.005	143.45	161.808	168.417	168.227	162.644	160.336		256	136.493	149.873	155.818	165.35	177.925	184.571	194.8														256	128.4	128.35	158.2	106.9	152.8	141.55	140	126.65	126.6	130	134.6	145.8	141.9	141	154	131.8	146.2	169.6
	192	143.477	157.75	179.967	189.258	187.227	184.512	182.901		192	160.667	173.782	177.527	185.475	195.85	199.057	205.633														192	141	137.1	167.4	114.7	159	151.3	149	132.45	141.6	139.5	145.2	155.8	155.3	154.2	175	148.2	158	188
	128	152.223	170.425	196.558	208.683	205.619	204.994	203.892		128	183.333	195.982	197.945	203.95	212.225	212.457	215.867														128	152.2	145.8	175.2	121.6	163	161.4	156	137.55	155.8	150.5	155.4	164.2	166.55	165.6	195.8	163	167.4	204
	64	158.955	179.392	208.45	222.592	219.289	220.256	219.15		64	199.56	211.964	212.564	217.05	224.3	222.629	224.167														64	159.6	152.8	180.4	125.7	165.8	170.2	161.8	141.6	167.6	160	163	170.8	174.35	173.6	211.8	172.8	173	216.8
	0	161.868	182.65	212.2	227.133	224.602	226.169	224.313		0	205.213	217.091	217.6	220.925	228.875	227.686	227.667														0	161.2	156.75	181	127.3	166	175.5	163.6	143.9	174.8	165.7	164.8	174	177.9	176.8	218.2	175.8	173.2	223.6
	-64	159.686	179.533	206.308	219.467	218.614	220.119	217.147		-64	198.253	209.345	210.364	213.525	223.475	225.686	224.067														-64	156.2	156.05	174.8	125	163.4	175.25	161.4	143.55	174	165.5	161.4	173.6	177	175.2	213.4	170	168	223.2
	-128	152.268	169.942	191.525	199.867	200.894	202.019	198.358		-128	179.693	189.273	191.436	195.225	207.625	215.2	212.133														-128	146	149.65	162.4	119	158.6	169.25	154.2	139.75	165.8	158.7	151.6	168.2	171.25	168.8	198.4	156.2	156.8	216.4
	-192	139.973	155.025	170.342	171.375	174.441	174.856	170.741		-192	153.68	161.164	164.309	169.225	183.375	196.6	192														-192	131.8	137.75	144.2	110.4	150	157.7	141.4	131.75	150.8	145.9	138	157	161.15	157.6	175.8	137	141.6	203.2
	-256	124.609	136.642	146.475	139.608	143.77	143.412	139.34		-256	125.68	130.855	134.2	140.15	154.15	171.286	165.967														-256	115.4	121.95	123.2	99.2	139.6	141.95	126	120.1	132.2	128.9	122.2	141	147.85	142	149.2	115.8	124	185.8
	-320	107.927	116.933	123.267	109.833	114.231	113.294	109.253		-320	100.64	103.345	105.964	112.45	124.85	142.286	137.433														-320	99	105.1	101.8	88.2	126.6	124.2	108.6	106.1	112.6	109.2	105.8	121.4	132.6	123.6	122.6	95.4	106	165.6
	-384	92.2955	98.2167	102.983	85.7417	89.8486	88.3563	84.042		-384	81.6133	81.9636	83.4	89.775	98.9	113.429	110.067														-384	84	89.2	83.6	77.8	113.6	106	93.2	91.25	95.6	90	91	102.2	117.1	105	98.6	78	88.4	144
	-448	78.9955	82.3417	86.6833	68.7583	72.0459	70.2687	65.2301		-448	69.0933	67.4364	67.4182	73.5	79.025	88.0571	86.1667														-448	72.4	75.55	69.6	69.3	100.6	89.7	80.2	78	81.4	73.4	78.8	85.2	103.05	88.4	79.8	65.4	72.2	122.6
	-512	68.9909	70.1583	74.6	58.05	60.3169	58.9625	52.6564		-512	61.8133	58.9273	57.8364	63.2	65.25	68.4571	67.4														-512	64.2	65.35	60.8	63.2	89.6	77.2	71.2	67.45	71	60.5	68.4	71.6	91.15	75.4	66.2	56.6	60	102.6
	-576	62.2364	61.775	66.075	51.9667	53.5499	52.9312	45.1945		-576	58.0933	54.8545	53.1091	57.825	56.875	55	53.7333														-576	59.4	58.45	56.4	58	81.4	69	65.8	59.95	63	52	61.2	62.8	81.25	66.4	58.2	50.8	51.2	85.6
	-640	58.3682	56.575	60.85	49.1583	49.9074	50.275	41.3576		-640	56.56	53.5091	51.6727	55.85	52.675	46.8571	44.6333														-640	56.8	54.2	54.8	54.2	75.8	64.85	63.8	55.9	58.8	46.9	56	57.4	73.05	60.4	53.4	48.4	46.8	74
	-704	56.3636	53.55	57.8	47.9417	48.0757	49.425	39.884		-704	55.9067	53.3455	52	55.675	50.7	42.1714	39.1333														-704	55.4	51.9	54.4	52.2	72.2	63.35	62.2	54.15	55.8	45.8	52.6	54	66.5	56.8	51.6	47.2	45.2	66.2
	-768	55.6045	51.9667	55.7917	47.4583	47.389	49.2625	39.6065		-768	55.6667	53.6545	53.0545	56.25	49.825	39.9143	35.8333														-768	55.4	50.75	54.4	51.1	70.2	62.9	61.8	53.6	54.2	46.9	50.4	51.6	61.2	54.2	51	47.8	46	61.8
	-832	55.3636	51.4083	54.6083	47.4333	47.11	49.2437	40.1574		-832	55.64	53.9273	54.0364	56.9	49.2	38.9143	34.2333														-832	54.8	50.35	54.4	51.4	69	62.25	60.8	53.8	53	49.4	49.8	49.2	57.25	53.8	50.8	49.8	47.6	59.6
	-896	55.3909	51.1917	54.0417	47.5917	47.3497	49	40.8945		-896	55.6533	54.3818	54.7273	57.075	48.65	38.4571	33.1667														-896	55	50.5	53.8	52.3	67	60.85	60.8	54.15	52.6	52.3	50	46.6	54.75	53.8	50.8	52	49.2	58.2
	-960	55.4636	51.4167	53.7	48.3083	48.1151	48.5437	41.5189		-960	55.7333	54.9091	54.7818	56.75	47.8	38.3429	32.6667														-960	55.8	50.85	53.4	53.5	65.2	58.75	60.2	54.7	52.6	54.3	50.8	44.2	53.3	54.2	50.8	54.6	51.4	57.2
	-1024	55.6636	51.725	53.4	48.9083	48.9366	48.0875	42.0252		-1024	55.8267	55.5455	54.4364	55.675	47.35	38.2	32.2667														-1024	56.8	51.05	53.6	55	62.8	56.3	59.8	55.35	52.8	56	52.8	42.2	53.55	54.8	50.4	56.4	53	56.4
	-1088	55.8273	51.7167	53.2	49.4	49.6761	47.4	42.15		-1088	55.9333	56.6364	53.7455	54.05	46.825	38.1714	32.1														-1088	58.6	51.05	54.8	56.1	61	54.25	58.4	56	53	55.9	55	40.6	54.9	54.4	49.2	57.2	54	56
	-1152	56.0545	51.55	52.7	49.8417	49.8999	46.5187	42.1365		-1152	55.6533	57.6727	53	52.325	46.575	38.2286	32.1														-1152	60.8	50.75	56.6	57.5	60	53.25	56.2	56.7	53.4	54.8	56.6	39.8	56.5	53.6	48.4	56.4	54.6	55.8
	-1216	56.1545	51.05	52.1583	50.1167	50.0261	45.6625	41.8377		-1216	55.2267	58.4545	52.3818	50.95	46.225	38.2857	32.3667														-1216	62.2	50.3	59.4	58.3	59.8	53.3	53.4	56.8	53.6	53	57.6	38.8	57.9	52.2	47	55.6	54.8	55.6
	-1280	55.9045	50.3083	51.7167	49.8333	49.574	45.0312	41.4213		-1280	54.6933	58.5636	51.9091	50.2	46.15	38.4	32.5														-1280	63.2	49.9	61.4	58.4	60.4	53.7	49.8	55.55	54.2	51.2	57.2	39.4	58.25	50.6	46.2	53.2	54.2	54.8
	-1344	55.5409	49.3	51.5333	49.625	48.8463	44.7125	40.8603		-1344	54.12	58.2364	51.5636	50.225	46.275	38.6857	32.9														-1344	64.2	49.85	61.8	58.2	61.6	54.25	47.4	52.95	55	49.9	55.8	40	57.4	49	45.6	50.8	53	54
	-1408	55.0773	48.4583	52.1083	49.1583	48.0549	44.825	40.3069		-1408	53.6533	57.4909	51.3636	50.875	46.525	38.6	33.5														-1408	65	50.4	60.6	57.4	62.8	54.45	46	49.7	55.8	49.7	54	41.6	55.75	48	45.4	48.2	51.8	52.8
	-1472	54.77	48.0917	53.0083	48.775	47.5166	45.0125	40.1047		-1472	53.2933	56.5091	51.2727	51.55	46.85	38.1714	34														-1472	65		57.6	56.4	63.6	53.9	45.8	46.6	55.8	50.2	52.8	44	53.95	47	45.8	46.4	51.4	51.8
	-1536	54.025	47.9833	54.0917	48.5583	47.2419	45.4375	40.1327		-1536	53.2533	55.7273	51.1455	52.1	47.325	37.4	34.5														-1536	64.8		53.4	55.5	63.6	53.25	46.2	44.3	56.8	50.8	51.6	47	52.3	46.6	46.4	45.2	50.4	50.6
	-1600	53.36	48.325	55.0833	48.6667	47.2816	45.9562	40.3136		-1600	53.5067	54.9636	51.1091	52.125	47.775	36.9714	34.8														-1600	64.4		49.6	55.2	62.4	52.65	46.4	43.25	57.4	51.1	51.2	50.8	51.35	45.4	47.8	45.2	49.4	49.2
	-1664	52.76	49.1417	55.4667	49.275	47.4554	46.8125	40.7922		-1664	53.7333	54.2909	51.2727	52.05	48.25	36.6286	34.8333														-1664	62.2		46.4	55.1	59.8	52.4	46.6	43.5	58.6	51	52	54.6	51.05	44.8	50	45.6	48.8	48
	-1728	52.32	50.2083	55.425	50.0167	47.6233	47.775	41.3415		-1728	53.9333	53.8545	51.5091	51.675	48.575	36.5714	34.8														-1728	60.2		44.6	55	57.2	52.65	46.2	44.15	59.4	51	52.8	58.2	50.85	44.8	52.8	46.2	48.4	46.8
	-1792	52.03	50.8583	54.875	50.7333	47.5486	48.8938	41.9711		-1792	53.92	53.6	51.9273	51.2	48.7	36.6571	34.3														-1792	58.4		43.2	55.3	55.6	52.95	45.6	45.25	59	51.4	53.6	60	50.75	44.8	55.6	46.6	47.4	45.2
	-1856	51.825	51.2917	54.5333	51.325	47.1103	49.9312	42.482		-1856	53.8267	53.5091	52.4727	50.75	48.625	36.8571	33.6333														-1856	56.4		43	55.9	54.8	53.05	45.6	47.1	57	51.4	54	59.6	50.35	45.8	58.2	46.6	47.2	44
	-1920	51.735	51.3167	54.1583	51.575	46.7306	50.725	42.9001		-1920	53.36	53.3818	52.9273	50.575	48.425	37.0857	33														-1920	55.4		42.6	56.2	55.6	52.8	46	49.05	53.8	51.1	54.8	57.2	49.7	47.2	60	46.4	47.4	42.6
	-1984	51.7	51.76	53.8333	51.5917	46.5386	51.0562	42.8933		-1984	52.9733	53.2	53.2909	50.625	48.325	37.4571	32.3333														-1984	54.8		42.4	56.7	57.6	52.25	47	51.25	49.8	50.4	54.8	53.8		49.6	60.2	46.8	48.4	41
	-2048	51.885	51.76	53.5917	51.5417	46.6261	51	42.6245		-2048	52.6667	52.9273	53.4364	50.95	47.975	37.8	31.3333														-2048	55		43	57.1	61	51.9	47.6	53.45	45.8	49.6	54.4	50.4		52.2	59.2	47	50	39.6
	-2112	52.41	51.92	53.0917	51.3667	46.9916	50.4937	42.231		-2112	52.68	52.5818	53.2	51.25	47.625	38.1143	30.8667														-2112	55.2		44.2	57.4	64.4	51.95	48.6	55.25	43.4	49.5	54.2	48		54	57.2	48.6	51.8	38.4
	-2176	52.995	52.32	52.225	51.425	47.849	49.8125	41.7316		-2176	52.9333	52.0909	52.8909	51.475	47.175	38.0857	30.3														-2176	55.6		46.4	57.4	67.6	52.7	48.8	56.35	43	48.7	53.4	47.2		55	54.6	50.6	54.2	38
	-2240	53.66	52.24	51.35	51.475	48.5644	48.9312	41.5136		-2240	53.2933	51.6909	52.4545	51.625	46.75	38.2286	30														-2240	56		49.2	56.3	70.2	54.55	49	56.05	44.8	48.1	52.4	46.2		55.4	51.2	52.6	55.8	38.2
	-2304	54.14	52.2	50.7083	51.6167	49.3224	48.3125	41.4584		-2304	53.56	51.3091	51.9636	51.7	46.25	37.9714	30.0333														-2304	55.4		52.4	54.7	71.4	57.35	48.4	54.75	47.8	47.8	51.4	46.2		54.8	48.2	54.4	57.4	39.4
	-2368	54.55	51.92	50.3833	51.7833	49.7803	47.9062	41.6608		-2368	53.9733	51.2364	51.4	51.625	45.925	37.5429	30.2														-2368	54.6		55.2	52.7	71.6	60.75	48	53.15	51.4	47.3	50.8	46		54	45.6	56	58	40.6
	-2432	54.785	51.6	50.275	51.6167	49.8733	47.9188	41.9828		-2432	54.24	51.3636	50.8	51.625	45.775	37.0286	30.6														-2432	53.6		57.2	50.9	69.6	63.95	48.2	51.7	55	47.1	50.6	46.6		53	44	56.6	57.8	42
	-2496	55.065	51.52	50.725	51.2667	49.6731	47.9562	42.3859		-2496	54.4133	51.8	50.5091	51.725	45.85	36.3429	31.2667														-2496	52.4		58	50.2	67.2	66.25	49.2	51.1	57.6	47.7	51	47.6		52.2	43.4	57.6	56.8	43.4
[truncated: 101 more columns]

## Sheet: Fig 2. H
average	run1	0.125	0.25	0.5	1	2	4	8		run2	0.125	0.25	0.5	1	2	4	8														run1 individuals
Position	position	1.5:1 average	3:1 average	6:1 average	12:1 average	24:1 average	48:1 average	96:1 average		position	96:1 average	48:1 average	24:1 average	12:1 average	6:1 average	3:1 average	1.5:1 average			tip/lattice	1.5 to 1	3 to 1	6 to 1	12 to 1	24 to 1	48 to 1	96 to 1				Position	1.5:1 growth1	1.5:1 growth2	1.5:1 growth3	1.5:1 growth4	1.5:1 growth5	1.5:1 growth6	1.5:1 growth7	1.5:1 growth8	1.5:1 growth9	3:1 growth1	3:1 growth2	3:1 growth3	3:1 growth4	3:1 growth5	6:1 growth1	6:1 growth2	6:1 growth3	6:1 growth4
	2496	59.2611	71.96	67.4167	54.8	56.3417	49.88	52.1363		2496	51.6	43.4	54.6286	59	60.9167	61.34	52.2143			run1	1.34072	1.68936	2.26034	2.51911	2.82147	3.35157	3.30273				2496	53.2	38.6	51.75	41.8	41.6	52.4	41.4	45.4	167.2	52.2	49	48.6	118	92	47.4	74.6	84.6	50
	2432	59.6667	74.49	68.4333	55.1857	56.4417	49.6	52.6581		2432	51.92	43.6313	54.2143	60.24	62.125	60.9	52.8286			run2	1.55138	2.26738	2.32507	2.63695	2.66118	2.90678	2.76639				2432	56	39.1	50.8	41.8	43.85	52.8	39.9	45.4	167.35	51.6	50.8	47.65	117.8	104.6	50.4	75.6	83.4	51.4
	2368	60.2167	77.22	69.4167	55.3857	54.9214	48.55	52.9074		2368	52.16	43.7188	53.7857	61.24	63.4417	60.45	53.9286			average	1.44605	1.97837	2.29271	2.57803	2.74133	3.12917	3.03456				2368	58.6	40.65	49.9	41	48.05	52.6	38.6	44.8	167.75	53	54.4	46.9	117.2	114.6	53	77.4	82.4	53.2
	2304	61.3667	80.34	70.2167	55.6	54.3286	48.7667	53.2067		2304	52.16	43.8313	53.05	61.72	64.6583	60.23	55.2286														2304	60.6	43.05	49.1	40.4	55	52.4	38.2	45	168.55	56	60.6	46.5	117.8	120.8	55.2	79.2	82.8	54.2
	2240	63.0778	84.22	71.2333	55.7143	53.5643	49.4417	53.6873		2240	52.08	44.2437	52.7812	62.2	65.7	60.62	56.9143														2240	61.8	45.4	48.55	40	65.55	52	38.3	46	170.1	62	69.6	46.3	119.8	123.4	57	81	84	55.8
	2176	65.3	88.53	72.0667	56.1	52.8929	50.5167	54.3394		2176	52.6	45.0125	52.9125	62.52	66.8083	61.67	58.0429														2176	61.2	47.2	48.35	39.8	79.5	52	38.45	49.6	171.6	69.6	80.2	46.25	122.2	124.4	59	81.6	86.2	56.4
	2112	67.7778	93.07	73.05	56.5	52.7786	51.7083	54.9307		2112	53.04	45.9812	53.2812	63.08	68.025	63.64	59.5143														2112	59.2	48.2	48.3	39.8	95.3	52	38.85	56.2	172.15	78.4	91	46.55	124.4	125	62.6	81.8	87.4	56.8
	2048	70.6611	97.38	74.05	56.7571	53.3286	52.9417	55.2867		2048	53.88	47.2687	54.0875	63.76	69.4583	66.32	60.9286														2048	57	48.05	48.7	41	110.85	52.6	39.25	66.6	171.9	87.2	100.8	47.7	125.6	125.6	67	81.2	87.8	57.6
	1984	73.8111	100.64	75.7833	57.0286	54.4714	54.075	55.5171		1984	54.92	48.775	55.3188	64.64	70.925	69.08	62.7														1984	53.8	47.3	50.1	44	124.85	53.2	39.1	80.8	171.15	94.8	107.6	50.2	124.4	126.2	72.6	80.6	86.8	60.2
	1920	77.6611	102.69	78	57.4571	56.1857	54.9417	55.4299		1920	55.6	50.625	56.7875	65.76	72.575	71.61	64.7429														1920	51.8	46.4	52.75	49.6	136.3	55	38.85	97.8	170.45	100.4	111	54.05	122.2	125.8	79	80.6	84	65
	1856	82.0389	103.95	80.2667	57.9286	57.7643	55.525	55.309		1856	55.96	52.6625	58.4125	67	74.0917	73.66	66.9857														1856	49.8	45.4	57.55	58.6	144.75	57.4	39.3	115.2	170.35	105	113.2	59.55	118.4	123.6	84.8	81.4	80.2	69.8
	1792	87.3778	104.92	82.75	58.5143	59.2429	55.6167	55.0164		1792	56.08	54.8813	60.1938	68.4	75.45	75.36	68.9571														1792	48.2	44.55	65.5	72.4	150.9	61.4	41.2	131.4	170.85	107.4	114.8	66.6	115.4	120.4	89.6	84	76.8	75
	1728	93.7778	106.11	84.7667	59.3857	60.5643	55.5167	54.7697		1728	55.8	57.0312	61.9375	69.8	76.5333	76.72	70.8857														1728	47.2	43.85	77.65	89.2	155.75	68.6	45.75	144.6	171.4	109.2	116	74.95	113	117.4	93	86.8	73.8	79.4
	1664	101.272	108.2	86.5333	60.6714	61.6786	55.5833	54.2784		1664	55.76	58.7125	64.025	71.28	77.2083	77.55	72.5429														1664	46.6	43.8	93.9	108	159.4	79	54.2	154.8	171.75	111	117.8	84.4	111.8	116	95.6	89.6	72.4	83.6
	1600	109.578	111.28	87.8833	62.4	62.8071	56.1667	54.121		1600	55.76	59.8563	66.1438	72.44	77.7667	77.87	73.6														1600	46.8	44.7	113	125.6	161.8	93.2	67.3	161.6	172.2	112.8	120.4	94.6	112.4	116.2	97.4	91.2	72.4	87.6
	1536	118.328	114.97	88.95	64.7857	63.7357	56.95	53.8651		1536	56.2	60.625	68.4313	73.44	78.3083	77.77	74.2143														1536	48.8	46.65	133.25	139.6	163	109.6	85	166	173.05	113.8	123	104.45	115	118.6	97.8	91.6	74.6	91.2
	1472	127.189	118.44	89.3167	67.2714	64.7714	58.3417	53.9181		1472	56.72	61.2125	70.6438	74.16	78.8	77.04	74.4143														1472	53.8	50.55	152.25	149.2	162.95	126.8	106.2	168.6	174.35	114.6	125.2	112.8	117.8	121.8	97.6	90	77.2	93.8
	1408	135.639	121.25	89.6667	69.8429	65.8	59.7083	54.0111		1408	57.6	61.6937	72.6375	74.64	79.5	75.96	74.4429														1408	62.6	57.8	167.95	154	162	142.4	128.7	169.6	175.7	114	126.6	119.45	121	125.2	97.6	87.4	80.6	95
	1344	143.611	122.92	89.9667	72.4	66.9143	61.1	54.1146		1344	59.04	62.35	74.15	75.36	80.0417	74.86	74.1857														1344	75.8	69.3	179.15	155.2	160.6	155.4	149.35	171.4	176.3	112.6	126.6	124.4	123.6	127.4	97.6	84.6	84.2	95
	1280	150.6	124	90.2167	74.7286	68.0714	61.75	54.4523		1280	60.84	63.2812	75.4375	76.04	80.7083	74.16	74.0429														1280	92.4	84.25	186	154.2	159.2	165.6	165.6	172	176.15	111.6	125.4	128	126.2	128.8	97.6	81.6	87.6	94
	1216	156.428	124.95	90.5333	77.1571	69.4429	62.4583	55.1234		1216	63	64.6062	76.4938	77.16	81.4583	73.9	74.1														1216	110.8	100.9	188.4	152.4	158.3	172.4	176.55	172.8	175.3	111.8	124	130.95	128.2	129.8	97.6	79.4	90	92.2
	1152	160.989	126.19	91.3667	79.5	70.8929	62.725	56.34		1152	65.6	66.3438	77.525	78.72	82.55	74.12	74.4														1152	129.4	116.95	186.95	151.8	158.5	176	182.45	173.2	173.65	113.6	122.8	133.55	130.4	130.6	98.6	78.4	91.4	90.6
	1088	164.183	127.77	92.5667	81.8714	72.7	63.025	58.1163		1088	68.8	68.5187	78.6188	80.2	83.6917	74.66	74.9														1088	146.6	130.05	182.9	152.8	159.3	176.6	184.75	172.8	171.85	116.2	122.4	135.85	133.4	131	100.2	78.4	92	89.2
	1024	165.889	129.72	94.25	84.1714	74.2286	63.75	60.6901		1024	72.56	71.0562	79.9437	82.32	84.9083	75.3	75.6143														1024	160.8	139.25	177	155	160.15	174	185.05	171.4	170.35	119.6	122.8	137.6	137.2	131.4	103	79.6	91.8	88.4
	960	166.9	131.24	96.1	86.2143	76.1357	65.05	63.8363		960	76.96	74.025	81.775	84.28	86.425	76.02	76.1571														960	172	144.75	171.15	158.8	160.95	171.2	183.85	170	169.4	122.2	122	138.6	141	132.4	105.8	82.4	91.4	88.4
	896	167.311	132.37	98.3333	88.2286	78.1786	66.725	67.485		896	82.36	77.6375	83.9875	86.6	88.1083	76.82	76.4571														896	179.4	147.5	166.8	162.2	161.65	169	181.5	168	169.75	124	121.2	138.65	144.6	133.4	108.8	85.6	92.2	89.4
	832	167.578	133.02	100.667	90.2	80.6857	69.3333	71.6314		832	88.24	81.5438	86.825	89.4	90	77.65	76.7														832	184	148.6	164.1	164.6	162.4	168.2	178.5	166.4	171.4	125.8	120.6	137.7	147.2	133.8	111.8	89.2	94.4	90.6
	768	167.867	133.33	103.25	92.3571	83.7857	72.4	76.0214		768	94.76	86.2938	90.4813	92.64	92.475	78.66	76.6714														768	186.2	148.35	163.6	166.6	162.8	169	175.65	164.6	174	127.6	120	136.25	148.4	134.4	115	91.8	98.6	92.8
	704	168.344	133.52	106.1	95.1429	87.6643	76.1	80.98		704	101.84	92.025	95.2125	96.56	95.125	80.24	76.7143														704	188	147.75	165.15	166.8	162.45	171	173.85	163.2	176.9	129.4	120.4	134.8	148.4	134.6	117.6	93.8	103.8	96.2
	640	169.189	134.5	109.817	98.6571	92.8357	80.3667	86.4759		640	109.88	99.15	101.294	101.44	98.0333	82.2	76.9286														640	189	147.4	168.2	167.4	161.6	172.8	173.35	163.6	179.35	131.8	123	133.7	149	135	121	96	109.4	101.2
	576	170.333	136.63	114.6	103.457	99.0214	85.7417	92.9293		576	118.8	108.031	109.144	107.24	101.308	84.99	77.3714														576	189.6	147.25	172.65	168	160.95	174	173.75	165.6	181.2	134	128.4	133.55	150.8	136.4	124.8	97.6	114.8	109.2
	512	172.133	140.61	120.983	110.286	106.929	92.7667	100.883		512	129	118.95	118.737	114.84	105.633	88.39	77.9857														512	190.2	148	178.35	170.4	161.15	174.4	174.8	169	182.9	137.2	136	135.45	155	139.4	131	101.6	118.4	119
	448	174.967	146.99	129.467	119.486	116.707	102.742	111.133		448	140.64	131.781	130.162	125	111.908	93.42	79.5														448	191	150.15	184.7	174.8	162.85	175	176.9	174.2	185.1	141.8	145.4	140.15	161.6	146	139	108.2	123.4	130.4
	384	179.144	155.74	140.6	131.214	129.186	116.25	124.593		384	154	146.544	143.306	138.24	121.058	100.69	82.2143														384	192.4	154.3	191.2	180.6	167.25	176.8	180.7	180.6	188.45	148.4	156.2	147.7	170.6	155.8	150	119	129.6	143
	320	185.378	167.37	154.367	146.186	144.657	133.992	141.455		320	169.2	163.044	157.944	154.84	133.933	110.94	86.8857														320	195.4	161	197.6	188.8	175.1	181.4	187	188.8	193.3	157.6	168.8	158.65	182.6	169.2	164.6	135	139.2	155.8
	256	193.5	181.12	170.633	163.786	162.914	155.408	161.441		256	185.28	180.444	174.025	173.88	150.125	124.71	93.5143														256	201.2	170.3	203.65	198	185.75	189.6	195.5	197.8	199.7	168	183.2	172.4	196.2	185.8	181.4	156	153.4	168.4
	192	202.889	195.85	188.1	183.2	182.543	178.425	182.817		192	201.36	197.481	190.556	193.72	168.517	140.94	101.586														192	208.6	181.5	209.35	207.4	197.75	200.6	205.3	208	207.5	179.8	199.2	187.65	209.8	202.8	199	180	170.8	180.4
	128	212.656	209.33	204.367	201.743	201.271	200.167	202.621		128	215.24	212.569	206.331	211.84	186.525	156.72	109.657														128	217.2	192.8	215.05	217.6	209.3	213.2	215.15	218	215.6	190.6	214.8	202.65	221.2	217.4	215.2	203	189.6	190.8
	64	220.506	219.57	217	215.871	215.243	216.508	217.204		64	224.96	222.787	218.369	224.36	200.067	168.99	115.986														64	224.6	202.2	220.3	225.4	218.4	224	222.35	225.4	221.9	201.2	225.8	215.45	228.2	227.2	226.8	221.2	205.8	199.2
	0	224.317	223.62	222.267	222.257	220.579	223.633	222.885		0	227.84	225.675	223.506	228.36	204.858	174.18	118.614														0	229.6	207.55	223.4	228.8	222.75	229.8	224.75	228.2	224	207.2	228.4	223.5	229.4	229.6	230.2	228.4	215.4	203.6
	-64	221.706	219.38	217.65	218.143	214.3	219.142	217.329		-64	222.28	219.081	219	221.48	198.175	170.63	116.643														-64	228.6	207.05	222.75	224.8	220.45	227.8	221.4	223.2	219.3	206.4	220.6	223.3	223.2	223.4	224	222	214.6	201.2
	-128	211.367	205.97	202.167	203.286	196.679	203.167	200.748		-128	207.28	202.4	204.044	203.8	180.7	158.39	109.814														-128	220.6	200.05	215.85	210.6	210.5	217.6	212	208.6	206.5	196.4	203	212.25	208.2	210	206.4	201.8	202.4	190.4
	-192	193.45	184.18	177.6	179.7	170.429	178.325	175.462		-192	184.32	177.331	180.375	178.24	155.717	139.82	99.3714														-192	205.4	186.35	201.25	187.2	192.8	199	196.9	185.8	186.35	177.6	177.4	190.3	185.6	190	180.6	171	180.6	170.4
	-256	169.6	156.91	148.167	151.471	140.371	149.108	145.847		-256	155.88	147.688	151.75	148.32	128.775	118.44	87.5143														-256	183.2	166.85	179.55	157	168.4	175.6	177.4	157.6	160.8	151.4	148.4	160.95	157.6	166.2	150.8	136.6	152.8	145.8
	-320	142.878	128.21	118.967	123.114	111.643	120.375	116.681		-320	125.88	117.962	122.987	118.84	104.35	97.9	76.4286														-320	157.4	143.75	152.9	125.4	140.4	149.2	154.9	128.2	133.75	123.8	119.2	129.25	128.4	140.4	121.6	104.6	124.8	119.8
	-384	116.483	101.79	94.0167	98.5429	87.85	95.8833	91.9579		-384	98.28	91.85	97.8125	93.68	85.3083	80.64	67.3143														-384	129.6	119.4	125.3	97	113.35	122.8	130.65	101.4	108.85	98.4	93.4	100.15	101.6	115.4	96.8	79.2	100.8	97.2
	-448	93.2111	80.37	75.8	79.8286	70.4571	77.2333	73.4901		-448	75.72	71.7812	78.2125	74.72	72.2833	68.01	60.8429														-448	103.4	96.7	100.25	74.6	90.45	98.6	107.2	79.4	88.3	78.2	72.4	77.25	80.6	93.4	78.8	63	82.4	80.4
	-512	74.8944	64.8	63.7667	67.3857	59.0929	64.9333	61.7326		-512	59.24	58.0188	64.8625	62.28	63.9167	59.75	57.0143														-512	82.2	77.85	80.05	58.8	73.15	78.8	86.85	63.6	72.75	64.4	57.2	61.4	65.4	75.6	67.2	53.6	69.6	68.2
	-576	61.7278	54.67	57.2	60.0429	52.8786	57.5	55.3223		-576	48.68	49.8	56.5	55	59.0833	54.84	54.6857														-576	66.6	63.95	65.35	48.6	61.45	63.6	70.85	53	62.15	55.8	48	51.35	55.2	63	61	49.2	62	60.6
	-640	53.3222	48.82	53.9	56.3286	49.95	53.6333	52.5193		-640	42.68	45.5062	51.7188	51.12	56.6	52.22	53.2429														-640	56.4	54.9	55.75	42.8	53.8	53.6	59.8	46.8	56.05	51.6	43.2	45.5	49.2	54.6	58.6	48	56.6	55.2
	-704	48.4889	45.88	52.5	54.8143	49.2786	51.7583	51.3486		-704	39.56	43.8062	49.2	49	55.0333	50.78	52.4143														-704	50.4	49.75	50.55	40	48.55	47.2	52.6	44	53.35	49.8	41.6	42.6	45.8	49.6	57.6	47.6	53.4	51.8
	-768	46.2889	44.97	52.0833	54.2571	49.55	50.6833	50.485		-768	38.08	43.375	47.775	48.12	53.8833	49.96	52.0714														-768	48.2	47.95	48.3	39.2	44.95	43	48.35	43.8	52.85	50	42.2	41.65	44	47	57.6	47	51.6	50.2
	-832	45.5278	44.91	51.7	53.9857	50.2857	50.225	49.735		-832	37.32	43.325	46.975	47.76	53.0917	49.2	51.9143														-832	47.4	48.2	47.35	40	42.2	40.2	45.95	44.8	53.65	50.4	43.2	41.75	43.6	45.6	56.8	46.6	50.4	49.8
	-896	45.4778	44.99	51.4833	53.7	51.0643	49.7667	48.8711		-896	36.76	43.4563	46.2125	47.88	52.4167	48.7	52.2286														-896	48	49.3	47.2	41	40.05	38.4	44.4	46.2	54.75	51	44	42.55	42.4	45	56.2	46.4	49.6	50.2
	-960	45.7444	45.09	51.2	53.1	51.7	49.425	48.2146		-960	36.72	43.6875	45.6875	48.52	52.0667	47.92	52.3714														-960	49.6	50.35	47.4	42.6	38.55	37.6	43.65	46.8	55.15	51.4	44.2	43.85	41.8	44.2	55.4	47	48.8	51
	-1024	45.7722	45.03	50.9	52.5714	52.0286	48.9583	48.1576		-1024	36.76	43.8375	45.2625	49.76	51.825	47.37	52.5286														-1024	50.4	50.7	47.35	44.2	37.75	37.4	43.25	46.6	54.3	51.8	43.4	45.55	41.4	43	55.6	48	47.4	52
	-1088	45.6389	44.69	50.8833	52.2429	52.05	48.3917	48.4289		-1088	37.16	44.0812	44.85	51.04	51.6417	46.77	52.7857														-1088	50.4	50.4	47.4	46	37.85	37.4	43.25	45.8	52.25	51.4	41.6	47.05	41.4	42	55.8	50.2	46	53.6
	-1152	45.35	44.51	50.7667	52.1143	51.95	48.1417	49.207		-1152	37.64	44.3313	44.3312	52.28	51.6333	46.55	53.1571														-1152	50.2	49	47.55	46.4	38.75	38.4	43.8	44.4	49.65	51.2	40.2	48.55	41.6	41	56.4	51.8	44.4	55.6
	-1216	44.8722	44.47	51	52.5143	51.6714	48.125	49.7486		-1216	37.84	44.6562	43.8687	53.32	51.8083	46.67	53.6571														-1216	49.4	46.8	47.75	46.2	40.05	39.2	44.8	42.2	47.45	50.6	39.2	49.95	42	40.6	57.6	53.2	43.2	58.4
	-1280	44.4778	44.28	50.9333	52.9143	51.4929	48.175	50.2693		-1280	37.76	44.9437	43.3562	53.76	52.0333	47.4	54.1571														-1280	49	44	47.7	46.2	41.15	40	45.75	40.2	46.3	49.6	38	50.8	42.6	40.4	59	53.2	42.6	60.6
	-1344	44.1833	44.31	50.8	54.0429	51.1857	48.4	50.4051		-1344	37.4	45	42.8937	53.8	52.6167	48.46	54.4286														-1344	49.2	41.25	47.35	45.8	41.75	40.6	46.15	39.2	46.35	48.6	38	51.35	43.2	40.4	60.8	52.2	42.4	62.4
	-1408	44.0556	44.51	50.5833	54.9429	51.3929	48.65	50.1857		-1408	37.12	44.6813	42.7375	53.44	53.3333	49.67	54.5286														-1408	50	39.75	47.15	46	41.65	40.6	45.95	38.2	47.2	47.6	38.6	51.55	43.8	41	62	50.2	43.8	63.4
	-1472	44.2167	44.78	50.2	55.8	51.6643	48.9333	49.6436		-1472	36.76	44.1313	43.0125	52.72	53.8667	50.84	54.4429														-1472	50.8	39.55	47	46.8	40.6	40.6	45.35	39.2	48.05	46.8	39.6	51.7	44.4	41.4	62.6	48.2	45.6	63
	-1536	44.2611	44.96	49.9333	56.1571	52.0071	49.3167	48.8651		-1536	36.6	43.3125	43.6875	51.88	54.2083	51.68	54														-1536	51.2	40.55	46.8	47.4	38.8	40.6	44.6	40.2	48.2	46.2	40.8	51.8	44.8	41.2	62.4	46.8	48.2	61.4
	-1600	44.4278	45.42	49.5167	55.9571	52.2	49.3833	48.1849		-1600	36.96	42.2938	44.4312	50.72	54.0583	51.91	53.4857														-1600	51.2	42.7	46.6	48.4	37.2	40.8	44.05	41.6	47.3	46	41.8	52.1	45.4	41.8	61.2	45.8	49.6	59.4
	-1664	44.5722	45.5	49.2	55.4571	52.3429	49.7417	47.4867		-1664	37.2	41.2	45.3062	49.88	53.5333	51.68	52.8429														-1664	50.8	45.45	46.3	48.8	36.45	41	43.75	42.6	46	45.4	42.4	52.7	44.8	42.2	58.8	46.2	50.2	57.4
	-1728	44.5444	46.05	48.7167	54.8429	52.4929	50.35	47.0363		-1728	37.88	40.4688	45.9062	49.36	52.6417	50.8	52.0143														-1728	49.4	48	46.2	47.8	36.4	41.8	43.7	43.2	44.4	45.2	43.2	53.45	44.4	44	55.4	46.8	49.4	55.4
	-1792	44.35	46.35	48.0833	54.1714	52.5286	50.9333	46.7821		-1792	38.48	39.8125	46.175	49.16	51.5917	49.76	51.2571														-1792	47.6	49.65	46.4	46	37.1	42.6	43.6	43.4	42.8	45.4	43.8	53.95	43	45.6	52.6	46.8	47.8	53.6
	-1856	44.0167	46.65	47.4667	53.5429	52.8786	51.675	46.8661		-1856	39.08	39.5438	46.0125	49.48	50.6167	48.69	50.6857														-1856	45.6	50.05	46.95	43.4	38.15	44	42.85	43.4	41.75	45.8	44.4	53.65	41.8	47.6	49.8	46.8	46.4	51.8
	-1920	43.7	47.01	46.9667	53.1286	53.1929	52.1917	47.4421		-1920	39.6	39.3313	45.6563	49.68	50.075	48.02	50.4286														-1920	43.8	49.45	48.3	41.4	39.25	45	41.9	42.8	41.4	47.4	44.6	52.85	41.2	49	48	46.2	45.2	49.6
	-1984	43.4611	47.57	46.7	52.6429	53.55	52.4667	48.1129		-1984	39.8	39.2938	45.3312	50.12	49.5917	47.97	50.4286														-1984	42.2	47.5	50.15	38.8	40.2	46.6	41.2	42.6	41.9	49.2	44.8	51.65	41.8	50.4	46.8	45.6	44.8	47.4
	-2048	43.4778	48.01	46.5833	52.2429	53.9286	52.5083	48.9224		-2048	39.92	39.45	45.2375	50.6	49.475	48.57	50.7429														-2048	41.2	44.95	52.1	38	40.75	48	41.15	42.2	42.95	50.8	44.4	50.25	43.4	51.2	47	44.4	44.6	45.6
	-2112	43.9444	48.59	46.8667	51.9857	54.1929	52.2	49.6356		-2112	39.6	39.425	45.6062	51.04	49.3917	49.5	51.2286														-2112	41.4	42.45	54.05	38	41.5	50	41.8	42	44.3	51.6	44.2	49.15	46.2	51.8	47.6	43.6	45	45
	-2176	44.4611	48.89	47.3667	51.8143	54.2714	51.725	50.0574		-2176	39.28	39.3813	46.5125	51.24	49.4417	50.18	51.9714														-2176	41.8	39.8	55.2	38.8	42.25	51.2	43	42.4	45.7	51.8	43.4	48.65	48.8	51.8	48.6	43.2	45.2	45.2
	-2240	45.0167	48.98	48.4167	51.5714	54.1571	51.0583	50.324		-2240	39.04	39.4125	47.5687	51.04	49.475	50.65	52.7143														-2240	43.4	37.7	54.85	40.6	43	51.6	44.35	42.6	47.05	51.6	42	49.3	50.6	51.4	49.6	43.4	45.6	46.8
	-2304	45.2	49.06	49.3	51.5571	53.5286	50.0667	50.5067		-2304	38.92	39.3125	48.4625	50.68	49.2917	50.56	53.2714														-2304	44.6	36.55	53.4	42.2	43.65	51.4	45.05	42	47.95	51	41.2	51.3	51.4	50.4	49.8	44.2	44.6	49.6
	-2368	45.2556	48.84	50.2667	51.6857	52.6786	48.9333	50.5513		-2368	38.96	39.1625	48.8375	50.4	48.775	50.53	53.4857														-2368	46.4	36.45	51.45	42.8	43.95	50.6	44.7	42.4	48.55	49.8	40.6	54.4	51	48.4	49.8	45.6	44	52.6
	-2432	45.1611	48.71	51.0667	51.7143	51.6929	48.075	50.5296		-2432	39	39.0562	48.525	50.12	48.15	50.34	53.3857														-2432	47.6	37.35	49.65	43	44.35	49.2	43.75	42.6	48.95	48.2	41	57.95	49.2	47.2	49.6	46.8	43.4	55.8
	-2496	44.9111	48.75	51.4667	51.7571	50.4929	47.3917	50.3961		-2496	39.24	38.7687	47.7563	50.12	47.5833	50.29	53.0429														-2496	48	38.7	48.05	42	44.55	47.4	43.05	43.4	49.05	47.2	41.6	61.15	47.2	46.6	50	47	42.8	58.2
[truncated: 74 more columns]

## Sheet: Fig 2. I
average						No Edge	No Edge	With Edge	With Edge		Individual Growths
Position	position	GDP:GTP =6	GDP:GTP=12		tip/lattice	6 to 1	12 to 1	6 to 1	12 to 1		Position	6:1 no Edge growth1	6:1 no Edge growth2	6:1 no Edge growth3	6:1 no Edge growth4	6:1 no Edge growth5	6:1 no Edge growth6	6:1 no Edge growth7	6:1 no Edge growth8	6:1 no Edge growth9	6:1 no Edge growth10	6:1 no Edge growth11	6:1 no Edge growth12	6:1 no Edge growth13	6:1 no Edge growth14	6:1 no Edge growth15	6:1 no Edge growth16	6:1 no Edge growth17	6:1 no Edge growth18	6:1 no Edge growth19	6:1 no Edge growth20	6:1 no Edge growth21	6:1 no Edge growth22	6:1 no Edge growth23	6:1 no Edge growth24	6:1 no Edge growth25	6:1 no Edge growth26	6:1 no Edge growth27	6:1 no Edge growth28	6:1 no Edge growth29	6:1 no Edge growth30	6:1 no Edge growth31	6:1 no Edge growth32	6:1 no Edge growth33	6:1 no Edge growth34	6:1 no Edge growth35	6:1 no Edge growth36	6:1 no Edge growth37	6:1 no Edge growth38
	2496	56.37	55.4387			1.45822	1.56401	2.29271	2.57803		2496	75.4	50.8	43.8	48.8	49.6	53	53.4	44.4	52.2	49.8	65.4	69	65.2	63	69.2	60	53.4	54.4	67.2	49.8	52	74.8	47.4	69.4	52.6	56	53.4	49.8	63.8	53	54.2	47.8	61	48.8	67.8	57.4	45.2	40.6
	2432	57.335	56.129								2432	76	50.6	43.8	50	49.8	52	53	46.2	51.8	47.6	67	69.2	69	66	73.8	62.6	52.8	55.8	65.4	51.2	54	74.4	49.8	70.6	54.8	58.2	54	51.6	69	53	55	47.8	60.4	51.2	71.2	59	44.8	40.6
	2368	58.465	56.7613								2368	76	51.8	45.8	50.6	50	51.2	53.6	49	51.2	45.6	69.6	69.2	72.4	68.4	77.2	65.2	52.8	57	64	52.6	55.6	74.4	53	72.2	56.8	61	54	53.8	73.4	53.2	56.4	47.8	61	53.6	72.8	61.4	44.2	41.2
	2304	59.955	57.329								2304	75.6	55.6	48.6	50.8	49.6	51	54.4	52.4	51.2	44.6	72.6	69.4	75.2	70.8	80.2	67.6	53.6	58	62.8	55	56.6	75.6	57.6	74.2	59	63.8	54.6	55.6	77	53.4	58.6	48.2	62.2	55.4	73.8	65.4	43.8	43.2
	2240	61.59	57.9484								2240	74.6	60	52.4	50.8	48.6	52	55.4	55.8	52	45.8	75.2	69.6	77	72.8	82	70	54.8	59.6	61.8	58.2	56.8	77.4	61.8	75.6	60.4	67.2	56	57.6	79.4	54.2	60.8	49.2	64	56.4	73.8	69.8	44.8	46
	2176	63.365	58.4812								2176	73.2	64.6	56.2	51.6	47.6	54	55.6	59.4	53	48.4	76.2	69.2	78	74.2	83	72.8	56.8	61.4	61.2	61.6	56.6	80	65.4	76.6	61.4	71.2	57.4	60	80.4	56	63.4	51.6	65.6	56	74.2	74.2	47.6	50.6
	2112	65.105	59.2437								2112	72	67.8	60.4	52.8	47.6	56.8	55.4	62.8	54.4	52.6	75.6	68.6	78.8	75	83.2	76	59.2	64.2	61.6	65.2	56.4	82.2	68.2	77.2	61.2	75.2	58.2	61.8	79.8	58.4	65.6	55.2	66.8	54.2	75	78.2	52.2	55.2
	2048	66.54	59.9312								2048	71	69.8	63.8	55	48.4	61.2	55.4	66.4	54.8	57.6	74.4	67.8	78.6	74.8	81.8	78.6	61	67.8	62.4	68.4	55.4	83.6	70.2	77.4	60.6	79.2	58.6	63.8	78.2	60.8	67	59.6	67.6	51.2	75.6	80.6	57.4	59.6
	1984	67.7	60.675								1984	71	71	66.6	57.4	51	67	55.2	68.4	54.8	62.6	72.4	67.2	77.2	74	80.4	80.6	63.2	71	63.2	71.4	55	83.4	71.6	77.2	59.8	81.8	58.6	65.8	76.4	63.2	67.8	63.8	67.6	48.4	76.6	81.8	62.8	63.4
	1920	68.43	61.3125								1920	71.8	71	68.6	59.8	54.6	72.2	55	70	55	66.8	70.8	66.4	74.2	72.4	78.4	82.2	64.8	73.6	64.4	73.6	54.6	81.6	73.4	77.2	59.8	82.8	58.2	67	74.4	64.8	67.8	67.4	67.6	46	77.8	81.6	66.8	65.8
	1856	68.925	61.9875								1856	73	70.6	70	61.6	58.8	76.2	55.8	70.4	55.6	70	69.4	65	70.8	70.6	76.8	83	66.6	75	65	75.2	55.4	79.2	74.8	77.6	60.4	83.6	58.2	68.2	73.2	65.6	67.2	69.8	68	45.4	78.2	80.4	68.8	67
	1792	69.32	62.5437								1792	74.4	69.8	71.2	63.6	63	78.2	57.2	69.8	56.8	73	68.6	63.4	67.6	69	76.6	83.6	68.4	74.8	64.4	75.2	57.6	76.2	76	77.4	61.8	83.8	58.4	68.4	73	66.4	66.6	71.2	70	46.6	78	79.6	69.2	67
	1728	69.785	63.1062								1728	75.2	69.2	71.8	65.4	66.6	78.4	59.6	68.8	58.8	75.4	68.4	61.8	66	68.2	78.8	82.8	70.4	74.4	63.8	75.2	61.2	73.6	77	77.6	64.2	83.6	59.2	68.2	72.8	66	66.4	71.2	73.4	49.6	77.2	77.8	67.4	66.8
	1664	70.33	63.5563								1664	76.2	68.6	72.4	66.6	68.6	76.4	63.8	67.8	61.2	77.6	68.4	59.8	65.6	68	81.6	81.4	72	73.2	62.2	74.2	65.6	71.4	77.8	77.6	66.6	83.6	61	67.8	72.8	66.2	65.8	70.4	78.6	54.8	76	77.2	65.4	66.6
	1600	71.145	63.8812								1600	78	69	72.6	68.2	69.8	73.6	69	68	64	79.6	67.8	59	67.2	68.8	86	78.8	73.8	72.2	60.4	73.6	70.2	69.6	78	78	68.2	83.6	63.4	67.6	72.8	66.4	66.4	69.8	83.8	60.8	75.8	76.2	63.8	66
	1536	72.095	64.1688								1536	79.6	69.8	72.6	70	70.8	71	74.4	68.4	66.2	80.8	67.2	58.8	69.2	70	89.6	76.2	75	71.2	59.4	73.6	75	68.8	78.8	78.2	68.4	83	67	68.6	72.6	66.6	67.2	69.4	89	66.8	76	76.4	63.4	65.2
	1472	73.2	64.3438								1472	81	71.6	72.6	72.4	71.2	69.4	78.8	69.6	68.2	81	65.6	60.2	71.8	71	92.8	74	76	72	59.2	74.6	78.4	68.6	79.8	77.8	67.8	81.8	71.2	70.4	72.4	67.8	68.4	70	92.8	71.6	77.4	77	64.4	64.4
	1408	74.065	64.65								1408	82	73.6	73	75.4	72	69.2	81.2	70.2	68.4	81	63.2	62.6	72.8	72.2	94	71.8	76.4	73.2	61	75.8	80.4	68.4	80.6	77	66.8	80	75.6	73	71.6	69.2	70.2	71	94.4	74.6	78.4	77.8	66.4	63.2
	1344	74.74	64.8875								1344	82	75.4	74.4	78.4	73.2	70.4	82.6	71.2	67.6	80.4	61	65.8	73.2	73.6	94	70.2	76.8	75.2	64	77.6	81	68.2	82	75.4	65.6	76.8	80	76	71.2	70.6	71.4	71.6	94.6	76	79.4	78	67.8	61.6
	1280	75.09	65.0875								1280	81.6	76.4	76	80.6	74.8	72.8	81.6	72.2	66.2	79.6	59.4	69.2	72.6	74.2	92.8	68.8	76	76.8	67.2	79.4	80.6	68.4	81.8	73.6	65.8	73.2	83	78.8	71.2	72.2	71.8	72	93.2	76	80	78.8	68.6	60.8
	1216	75.135	65.35								1216	80.8	75.8	78	82.2	75.8	75.2	80.4	73.6	65.2	79.2	58.8	72	71.8	74.4	90.8	68.2	74.4	76.8	70.2	80.8	79	68.4	81.2	71.8	66.4	69.6	85.8	81.2	71.8	73.4	71.8	71.4	91	75.2	79.4	80	68	61
	1152	75.115	65.625								1152	80.2	74.4	79.6	82.4	76.6	77.4	79.4	75.4	65	78.2	59.6	74.4	70.8	75	88.8	68.6	72.6	74.8	72.6	81.2	77.6	68.4	80.6	71.6	67.2	66.4	87.6	82.4	73.2	74.4	70.4	69.8	88.4	75	78.8	81.6	67.2	62.2
	1088	75.055	65.8								1088	79.6	71.6	79.8	82	76.4	78	78.8	78	65.6	77.2	61	75.4	70	76.2	87.2	70	70.8	72	73.8	80.8	75.6	70.4	80	72.6	68	65.4	87.4	83	74.2	75.2	68.6	67.8	86	75.4	78.4	83.4	66.2	64.6
	1024	75.165	66.0187								1024	79.6	68.6	79.2	81	76	78	78.2	79.8	66.8	76.4	63.8	76.6	70.2	78.8	86.8	72.2	70	68.2	73.8	80.2	74.2	72.2	80.2	74.6	67.8	66.2	86.8	82.6	74.6	75.4	66	66	84.2	77.2	78	84.8	66.2	67.2
	960	75.435	66.1625								960	79	65.4	77.8	79.8	75.2	76.2	78	82	69.2	75.6	68	77.6	71.6	82	86.8	75.4	70.2	64.8	72.6	79.8	74	74.6	82	76.6	67.6	69	85	81.6	74	74.8	63.8	64.4	82.2	80.2	78.2	85.6	65.6	69.4
	896	75.805	66.4187								896	78.6	63	76.4	78.8	74.4	74.8	77.8	82.6	72	73.8	72.8	78.4	73.6	85.4	86.2	79	71	62.6	71	79.4	74.2	76	84.4	77.6	66.4	73	83	81	73.2	73.8	61.8	64.4	81	84.4	77.8	85	66	71.2
	832	76.14	66.6437								832	77.6	61.6	75.8	78.2	74.6	73.4	77	82.6	74.8	72	79	78.4	75.8	88.2	85	82.6	72.2	62.2	69	79	75	76.2	86.4	77.8	65.4	77.6	80.6	80.2	72.2	72.6	60.2	64.6	79.2	88	77.6	82.8	67.2	73.2
	768	76.585	67.1062								768	76.6	61.8	75.8	78.8	75.6	73.4	76.2	82.4	77.8	69.2	85.2	77.4	77.4	88.8	82.6	85.8	73.8	63.2	68	79.2	75.8	76	88.2	77.4	64.8	82	77.8	80.4	72	71.8	59.2	65.2	78	91.2	77.2	80.2	69.2	75
	704	76.95	67.8125								704	76	63.6	76.8	80	77.4	74.2	75.4	81.2	80.2	67.2	90.6	76.4	78.4	89.2	79.8	87.6	74.2	65.2	67.4	79.6	76	75	88.8	76.6	64.8	86	75.8	80.6	71.8	70.8	59.4	66	77	92.8	76.8	77.6	70.8	76.8
	640	77.445	68.8438								640	75.4	66.4	78.4	81.8	80.2	76.2	75.4	79.8	82.2	65.6	93.6	75	78.8	88.8	77.4	88.2	74.8	67.2	67.4	80.6	75.8	74.4	87.4	77	65.4	90	73.4	81.8	72.6	70.6	61	67	76.8	93.2	76.6	75.8	73	78.8
	576	78.14	70.2688								576	75.4	70	79.6	83.6	83.2	78.6	77	77.8	83.2	65.6	94.4	74.2	79.4	88	76.4	88.2	75	69	67.8	82.8	75.8	74.4	85.6	78.2	66.8	92.8	72.6	82.6	73.2	70.2	63.6	67.6	78	92.8	76.2	75.8	74.6	81.2
	512	79.335	72.35								512	76.8	72.8	81.4	85.2	86.4	81.6	80.4	76.2	83.8	67.2	92.8	74.6	79.6	87.4	77.4	88	75.8	71.2	68.6	86.4	76.6	75.6	83.6	80	68.8	95.2	73.8	83.6	73.6	70.2	67	68.6	80	92	76.6	77.6	76.6	84.2
	448	81.32	75.0688								448	79.6	76	83.4	87	90	83.8	84.4	75.2	84.6	69.8	91.2	75.4	80.8	87.8	79.8	88.6	77.8	74.2	70.2	90.6	78.6	78	82.8	82.8	71.8	97	76.8	85.4	74.6	71	71.4	70.2	83.8	92	78	81.2	78.8	88.4
	384	84.435	78.6812								384	84.2	78.8	86.8	89.2	93.8	86.6	89	76.4	86.2	74.4	90.4	77.4	83.6	90.2	84.2	90.2	81.8	77.8	72.8	96.6	82.2	81.6	83.6	86	75.4	99.2	82.2	88.6	76.4	73.2	76.6	72.2	88.8	93.8	81.2	85.4	81.4	93
	320	88.74	83.1625								320	90.2	81.8	91	92.8	99.4	89.2	93.2	79.2	89.8	80.6	91.2	80.2	87.8	95.2	89.8	93.8	88.2	83	76.2	103.4	87	86.4	86.6	89.4	79.4	101.8	88.8	92	79.2	76.8	82	75.4	94.6	98	87	89.8	85	98.2
	256	93.97	88.35								256	96.4	84.4	96	97	106.4	92	96.8	84.6	94.2	87.6	94	84.4	93.4	102.4	96	98.6	96	88.6	81	110	92.8	91.8	90.8	93.2	83	105.6	96.4	96.4	83.4	82.4	87.6	80.8	100.6	104.8	94.6	94.2	89.2	103.4
	192	99.685	93.8813								192	102.6	87	100.4	102.8	114.2	95.6	100.8	90.8	100.2	94.8	98.6	89.2	100	110.8	102	104.2	104.2	94.8	86	116.8	99.4	97	96.2	98	86.4	110.6	103.4	100.8	88	88.4	92.8	86.6	106.4	112.8	103.6	98.6	94.2	107.8
	128	105.02	98.9438								128	107.8	88.6	103.8	108.8	121.2	99.2	103.8	97.6	106.4	100.8	103.8	93.8	106.4	118.4	107.2	108.4	112	100.4	90.8	122.4	105	102	101.8	103	89.2	115.6	109.4	104.4	92.8	95	96.6	92.8	110.8	121	112.6	102.8	99.4	112
	64	108.895	102.763								64	111.2	89.6	105.8	113.4	125.4	102	106.4	103	110	104.6	108.4	97.4	111	122.6	111.2	111.4	117.4	103.8	94.6	126.4	109.2	106.6	106.2	108	91.4	119.6	113.4	107	96.2	100	99.4	97.4	113.4	127	119.4	105.6	103.8	115.8
	0	110.54	104.231								0	112	90	106	115.4	125.8	103.6	107.2	106	111.2	106	111.4	98	113.4	123.4	113.2	111.6	119.8	105	96.4	128.4	111.8	109	108.4	111	92.8	122.8	115.4	108.4	97.6	102.2	100.2	99.6	114	128.4	122.4	107.6	106.6	117.4
	-64	109.18	103.044								-64	109.8	88.8	105	113.8	121.8	103.4	105	105.4	108.4	104.2	111.4	94.6	112.6	119.6	112.8	110.6	119.8	103.6	95.4	127.4	111	108.2	107.2	110.8	92.8	122.6	114.6	107.8	95.2	101.2	99.2	98.4	113.2	124.6	121.6	107.2	106.4	117.2
	-128	105.015	98.9813								-128	104	85.4	102.8	108.6	114.2	102	101.6	101.6	102.2	99.6	108	88.6	108.2	111.6	110.4	108	117.8	99.8	92.8	122.8	106.6	104.4	102.6	106.2	91.6	119.6	112	106	90.4	97.4	95.8	93.6	110.4	116	116.4	104.2	103.4	114.2
	-192	98.29	92.6125								-192	95.4	79.8	99.4	100	103.8	98.4	95.4	95.6	94.2	92.2	101.8	80.8	100.4	100.4	106	105	113.8	94	87.6	115.2	99.2	96.8	95	98.6	89	113.4	107.2	102.6	83.2	91	90.4	86.6	105.8	103.4	107.8	97	98.4	108
	-256	89.97	84.7125								-256	86.2	72.8	94.2	91.2	92.6	94	88.8	88	84.6	84	92.2	71.4	90	88	99.8	100.6	107.6	86	81	104.8	89.2	87.6	86	88.4	84.4	105	100.8	97.8	75.4	83.2	84	77.8	99.8	89.8	98	88.2	91.2	98.8
	-320	81.135	76.3438								-320	76.4	64.8	87.8	81.8	82.2	87.8	82	80.8	75.4	76.2	81.6	62.2	79.2	75.6	92.6	94.6	99.8	77.2	74.2	92.8	78	77.6	77.6	78.4	78.6	95	94.4	92	68.4	74.8	76.2	69	92.8	77.6	87.2	78.8	83.6	87.6
	-384	72.71	68.5812								-384	67.4	57.8	80.2	73.4	72.8	80.4	74.8	73.8	67.2	70.6	70	53.8	68.8	64.8	85.8	87.4	90.8	67.8	67.4	81.4	67.8	69.2	70.2	69.2	71.4	85.2	87.6	85	63	66.6	68.8	62	84.8	68.2	77.6	70.4	76	76
	-448	65.51	61.95								-448	61	52.2	72.8	65.6	65.6	72.6	67.8	67.6	61.2	66.8	59.2	47.4	61.2	57.4	79	79.6	82	60.2	61.4	71.6	59.6	61.8	64.2	62.2	64.2	75.6	81.2	77.4	58.4	59.8	62	56.8	77.2	62.4	69.6	64	68.6	65.6
	-512	59.895	57.0625								-512	56.4	48.6	66	59	61	65	61.4	61.6	57.4	64.2	49.6	43.4	55.8	53.2	73.4	72.4	74.6	53.8	55.8	64	54.8	56.4	60.2	57.2	58	67.8	74.4	70	55.8	54.8	56.4	53.6	70.4	58.4	63.6	60.2	61.6	57.6
	-576	55.965	53.8125								-576	53.8	47.2	60.8	53.8	58.6	58.2	55.8	56	55.6	62.4	43.4	41.8	53.2	51.8	68.6	66.4	68.2	49.8	52.2	58.4	52.4	52.6	57.2	54.4	53.6	61.8	69.2	63.2	53.4	51.4	52.2	52	65.2	56.6	59.4	57	56	52
	-640	53.445	51.8875								-640	53.6	47.4	57	49.8	58	52.4	51.2	51.8	55.2	59.8	40.2	42	51.6	52	64.6	61.2	63.6	48.4	49.2	55.2	52.4	49.8	54.4	52.8	50.2	57.2	65.6	58.2	52	49.2	49.2	51	61.6	55.6	56.2	54.6	52.4	49.2
	-704	52	50.8625								-704	53.4	49	54.6	46.6	58.4	48	48.2	48.2	56	56.8	39.6	43.8	50.8	53.2	61.4	56.8	59.8	48.4	48.2	54	53.4	48.2	52.8	51.8	48	54.4	63.2	54.4	50.4	48.2	47	51.2	59.2	54.2	54	52.2	50.8	47.4
	-768	51.26	50.3688								-768	53.4	50.8	53.4	44.4	58.6	45.6	46.2	46.4	57	53.2	40.8	46.2	49.8	54	59.2	53.2	57.2	49.4	47.8	54.4	55	46.8	51.4	51	45.8	52.8	63	52.2	49	47.4	45.6	51.8	58.2	53.4	52.2	50.6	50.6	47
	-832	50.955	50.1875								-832	53.4	52.2	53.6	43.2	58.6	45.4	45.2	45.8	58.6	50.2	43	48	48.2	54.2	57.2	49.8	55	50.6	48.4	56.2	56	45.8	50.2	50	44	51.6	63.4	51.8	47.6	46.4	44.6	53	58.2	52.6	50.4	49.2	51.6	47.6
	-896	50.88	50.0687								-896	53.2	52.2	54.8	42.4	57.4	45.6	44	46.2	59.8	48.6	46	49.8	47.2	53.8	56	47.4	53.8	51.4	48.4	58.4	56.2	44.8	50	49.6	42.2	50.8	64	51.8	46.2	45.4	44	54	58.8	52.4	49.8	48.8	53	49
	-960	50.915	50.1312								-960	53	52	57.8	42	55	46.6	43.6	47	60.6	47.8	48.6	50.8	46.6	52.6	55.2	45.6	53	51.4	49.2	60.2	55.4	44	50.2	49.4	40.8	49.8	63.6	51.4	45.8	44.8	44.4	54.6	59.2	53.6	49.8	49	54.6	50.8
	-1024	51.05	50.1688								-1024	52.8	51.4	59.8	42.2	51	47.2	44	48.2	60.8	47.8	50.6	51.2	46.4	51.8	55.2	44.4	53.6	52	49.8	61.4	53.4	43.8	51	49.2	40.2	48.6	62.4	50.8	46.2	44.4	45.2	55	60.2	56.8	51	49.6	55.6	52.4
	-1088	51.16	50.2812								-1088	53	51	62	42.8	47	47.8	44.6	48.8	60.6	48.2	51.8	50.2	46	51.2	55.4	43.8	54.8	52.8	49.8	61.2	51.2	44	52	49.6	40.6	47.6	60.4	49.4	47.6	44.8	45.8	54.8	60.8	60.2	53.2	51.2	55.8	53.2
	-1152	51.305	50.5								-1152	53.2	51.4	62.6	43.8	42.8	48	46.4	49.4	59.8	48.4	52.8	49	46.8	50.6	56.4	44.2	55.6	54	50.2	60.2	49.6	45.2	52.8	50.6	41	46.6	58.6	48	49.8	45.2	45.6	54	61.4	63.8	55.2	52.6	55	53.4
	-1216	51.44	50.6759								-1216	54	52	61.6	46	39.4	48.6	48.6	49.6	59.2	48.4	53.6	47.2	48	50.4	57.4	45	56.2	55.6	50.2	59	49	46.6	53.8	50.8	42.4	46.6	57.4	47	51.8	45.4	44	52	61.6	66	56.6	54	54.2	52.6
	-1280	51.6103	50.7586								-1280	54	52.4	59.6	49	36.8	49.2	50.4	50	57.6	48.4	54.2	45.4	49.2	50.6	58.8	45.6	55.8	57	49.6	58	49.2	48	54.6	51	42.8	47.2	58.2	46.2	53		41	50	61.2	67	57.6	55.2	53	51.4
	-1344	51.5158	50.8071								-1344	53.8	52.6	57.2	51.2	35.8	50.2	52	49.6	56.4	48	54.6	43.6	50.2		60.4	46.8	54.6	57	48.8	57	50.4	49	55.6	51.4	42.8	48.4	60	45.4	53		38	48	60.4	66.2	57.8	55.2	51.8	49.6
	-1408	51.0647	50.7071								-1408	52.8	52.6			35.2	51.2	52.2	49	54.8	47.4	54.4	43			63.2	47.4	52	55.8	47.6	56.8		49	55.8	51.4	42.4	50.4	62.6	45.2	52		35.4	45.8	58.6	64	57.4	54.4	51	48.4
	-1472	50.65	51.0593								-1472	51.6	52				52.4	51.8	48	53	46.8	53.4	42.8				47.8	49.6	53.6	46.8	57		49	56	51.8	42.2	52.2	64	44.2	50.6		34.4	43.4	56.2	61.4	57	53.4	50.6	47.4
	-1536	50.331	51.0846								-1536	50.4	52				54.8	51.4	46.6	51.4	46.4	52.4	43.2				47.8	47.4		46.4	57.6		48.2	55.6	52	41.8	53.2	64.4				34.8	41.8	54.4	58.4	56	52.2	49.8	46.2
	-1600	50.0276	51.336								-1600	49.8	52				57.4	50.2	45.2	50.2	46.8	50.8	44.4				48	46		46.6	58.4		47.6	54.4	52.2	41.8	53.2	63.4				36.8	40.8	53.4	56.2	54.8	51.4	49.2	45
	-1664	50.0071	51.5								-1664	49.8	52.4				59.4	49.6	43.4	49.6	47	49.8	46.8				48.2			46.6	59.8		47	53.4	52	42	52.8	62				39.6	40.4	53.2	54	53.2	51	48.4	43.2
	-1728	49.8	52.1111								-1728	50.4	53				60.6		41.6	49.4	48.2	48.8	50.2				48.6			47.4	61.2		46			43		60.2				42.2	41	53.8	53	51.4	51.4	47.6	41
	-1792	50.2091	52.32								-1792	51	53.6				60.2		40.2	49.4		47.6	54.2				49.4			47	62.4		45					59				43.6	41.8	55.2	52.4	49.4	52.4	46.8	39.4
	-1856	50.0222	52.1833								-1856		54.2						39.8			47.6	57.2				50.4				62.4		44.4					58.4				44	43	56.6	52	47.8	53	47	38.8
	-1920	50.5875	52.1667								-1920		55									47.8	59.2				51.4				61.4		43.4									44	44.6	58.4	52.6	46.4	53.6	47.4	39.6
	-1984	50.6933	52.14								-1984		55									49.4	58.6				52				59.2		42.6									43	45.6	60	52.8	45.4	53	48	41.2
	-2048	51.4769	52.4								-2048		54.4									51.2	56.6				52.4				56.8		42.4									43.2	46.8	61.4	53.6		51.2		44.2
	-2112	51.6462	52.6								-2112		53.6									53.6	53.4				53				54.6		42.4									44.4	47	62.8	55.2		48.4		48
	-2176	51.3167	52.68								-2176		51.6									55.2	49.6								52.8		42.6									47	46.4	63.8	56.6		45		50.4
	-2240	51.1818	53.35								-2240		49.8									56	47.2								51.2		43.2										45	64.2	58.2		42.4		51.8
	-2304	52.4	53.4667								-2304		47.8									55.4											44										43.2	64.4	58.6				52
	-2368	53.0286	48.8								-2368		47.6									53.2																					41.8	64.4	59.2				50.8
	-2432	52.3333	48.4								-2432		47.6																														41	62.8	58.8				49
	-2496	50.12	46.6								-2496		48.2																														41		58.6				47
[truncated: 34 more columns]
