# Supplementary material for: Rapid binding to protofilament edge sites facilitates tip tracking of EB1 at growing microtubule plus-ends
Source: eLife. 2024 Feb 22;13:e91719. doi: 10.7554/eLife.91719 (PMC10883673; doi:10.7554/eLife.91719)
Supplement: Figure 3—source data 1. [file elife-91719-fig3-data1.xlsx]

## Sheet: Fig 3. C
	single comet	split comet
n	20	20
average	341.044	478.304
data	349.28	572.12
	364.8	461.12
	312.98	386.8
	306.16	604.46
	235.78	403.8
	294.5	514
	309.58	367.98
	413.72	362.5
	402.72	364.56
	295.2	520.98
	261.98	592.86
	324.28	476.36
	298.86	486.2
	342.2	369.98
	389.54	435.48
	391.3	512.16
	382.14	475.26
	384.96	613
	336.68	505.44
	424.22	541.02

## Sheet: Fig 3. F
	single comet	split comet
n	20	20
average	173.495	313.372
data	130.441	198.42
	67.851	132.231
	51.6488	255.069
	197.989	377.889
	64.4146	125.146
	190.117	371.154
	172.556	117.799
	209.342	479.341
	135.457	212.502
	225.205	304.52
	327.22	655.117
	130.749	231.824
	209.683	330.298
	68.288	177.978
	183.725	609.617
	194.027	206.771
	285.081	405.529
	99.959	327.333
	279.479	427.728
	246.658	321.175
