# Supplementary material for: Rapid binding to protofilament edge sites facilitates tip tracking of EB1 at growing microtubule plus-ends
Source: eLife. 2024 Feb 22;13:e91719. doi: 10.7554/eLife.91719 (PMC10883673; doi:10.7554/eLife.91719)
Supplement: Figure 4—figure supplement 1—source data 1. [file elife-91719-fig4-figsupp1-data1.xlsx]

## Sheet: Fig 4 Fig Sup 1 A Left
	Damged No Darpin	Damaged Darpin
count	194	187
average	0.205947	0.099332
data
	0.0921596	0.10577
	0.109207	0.08461
	0.26373	0.0309793
	0.0945253	0.0580706
	0.256418	0.0784104
	0.242105	0.0507766
	0.0512572	0.0193893
	0.27937	0.0335988
	0.215516	0.0704369
	0.100357	0.0467064
	0.164449	0.0498447
	0.201955	0.04585
	0.24768	0.0638246
	0.2914	0.12916
	0.219652	0.0731492
	0.210957	0.0378659
	0.228045	0.0272587
	0.145401	0.106413
	0.150014	0.160684
	0.19062	0.087819
	0.165807	0.0740783
	0.2342	0.0412431
	0.192674	0.0477864
	0.196504	0.0278807
	0.180007	0.0585483
	0.187702	0.136578
	0.0763037	0.0714198
	0.232503	0.0929142
	0.055959	0.046
	0.270814	0.0619341
	0.205533	0.0753084
	0.123044	0.160503
	0.204308	0.099355
	0.230988	0.105498
	0.246869	0.0598033
	0.160679	0.0587754
	0.262417	0.102047
	0.151508	0.0225571
	0.19911	0.0272339
	0.236497	0.0422501
	0.290721	0.0295217
	0.283848	0.0648248
	0.211695	0.0637341
	0.185162	0.0806433
	0.183509	0.116219
	0.231027	0.08502
	0.1698	0.122832
	0.312579	0.0358775
	0.308269	0.0664906
	0.200022	0.0565898
	0.244294	0.068286
	0.256912	0.0571473
	0.147866	0.0290126
	0.130044	0.0683074
	0.26788	0.0489405
	0.311558	0.106071
	0.181494	0.0623321
	0.247291	0.0454512
	0.22282	0.0843945
	0.110173	0.061716
	0.211565	0.069401
	0.322917	0.0685407
	0.187136	0.0886522
	0.222182	0.130034
	0.109447	0.158321
	0.270076	0.126953
	0.359884	0.0678918
	0.0795702	0.126288
	0.291869	0.0921915
	0.177965	0.193157
	0.19936	0.144232
	0.389444	0.116696
	0.322744	0.178398
	0.310428	0.136894
	0.253181	0.11668
	0.258876	0.0766448
	0.310653	0.1128
	0.173024	0.0570302
	0.176479	0.106582
	0.133041	0.13603
	0.160947	0.137755
	0.37042	0.0855395
	0.315837	0.173321
	0.462646	0.0841885
	0.0986332	0.195575
	0.28349	0.102326
	0.150591	0.153438
	0.197499	0.063437
	0.0502035	0.174884
	0.0565248	0.168359
	0.132073	0.0991974
	0.164554	0.268937
	0.179351	0.126598
	0.218639	0.0458292
	0.125248	0.12973
	0.229395	0.187441
	0.129173	0.0759626
	0.0742542	0.0616742
	0.156821	0.0951171
	0.245154	0.137215
	0.2941	0.0543268
	0.139325	0.0560624
	0.289457	0.0436704
	0.191019	0.070895
	0.215166	0.104844
	0.201124	0.0892414
	0.253206	0.0455028
	0.185106	0.191143
	0.180136	0.159868
	0.312558	0.121444
	0.48948	0.0944193
	0.22629	0.0889436
	0.138772	0.1515
	0.267888	0.129194
	0.297766	0.10745
	0.224757	0.104581
	0.203247	0.0547525
	0.272868	0.14394
	0.147769	0.0720129
	0.307475	0.0952404
	0.323718	0.135965
	0.279205	0.105485
	0.26575	0.0816915
	0.1673	0.137485
	0.0993928	0.128108
	0.204801	0.111893
	0.206316	0.149024
	0.251275	0.129445
	0.292378	0.162241
	0.325484	0.131454
	0.112932	0.0695805
	0.212817	0.129878
	0.0897404	0.0623554
	0.101207	0.131064
	0.352	0.0520425
	0.194388	0.109838
	0.150647	0.122645
	0.262861	0.0625431
	0.19592	0.0832781
	0.281	0.0827541
	0.158558	0.117063
	0.205589	0.210202
	0.216002	0.217052
	0.186374	0.0716204
	0.247241	0.210942
	0.253261	0.0779862
	0.15908	0.092925
	0.233971	0.0801452
	0.256047	0.104864
	0.295093	0.142415
	0.0798074	0.0892969
	0.130281	0.126648
	0.154332	0.0743429
	0.129005	0.0673674
	0.201158	0.215755
	0.135896	0.114564
	0.15172	0.0612517
	0.212504	0.141766
	0.214107	0.182838
	0.187029	0.145461
	0.194065	0.0916782
	0.267401	0.102472
	0.299043	0.05
	0.22639	0.11154
	0.169741	0.114912
	0.299147	0.0917747
	0.148546	0.0650532
	0.183889	0.132023
	0.270252	0.134114
	0.114874	0.178987
	0.217367	0.0487656
	0.306126	0.0714375
	0.127883	0.0748418
	0.214563	0.0900289
	0.164239	0.178555
	0.098414	0.102687
	0.128365	0.134221
	0.118137	0.140265
	0.316146	0.0606718
	0.120725	0.147211
	0.16098	0.0718974
	0.176763	0.0936853
	0.173063	0.120666
	0.136474	0.137059
	0.144752	0.158809
	0.255099	0.0525391
	0.268943	0.121193
	0.194494
	0.117823
	0.150909
	0.146959
	0.162001
	0.114029
	0.12587

## Sheet: Fig 4 Fig Sup 1 A Right
	Damged No Darpin	Damaged Darpin
count	170	171
average	0.278997	0.0948578
data	0.180335	0.101014
	0.226781	0.0914231
	0.28131	0.0779614
	0.145609	0.0708677
	0.0983854	0.137053
	0.16994	0.0539042
	0.224805	0.133294
	0.198396	0.0344603
	0.203624	0.0833532
	0.137776	0.0369023
	0.133275	0.125339
	0.175439	0.0569935
	0.220898	0.0424866
	0.25955	0.102958
	0.234065	0.0681008
	0.0993493	0.0755081
	0.181499	0.0643678
	0.141981	0.142857
	0.0559043	0.100357
	0.294351	0.104686
	0.195103	0.203697
	0.187525	0.152938
	0.184501	0.06
	0.372314	0.127119
	0.272435	0.249264
	0.084019	0.347116
	0.12135	0.208258
	0.154358	0.138261
	0.138624	0.18488
	0.313793	0.0958792
	0.100529	0.129234
	0.101948	0.158
	0.210542	0.204176
	0.397959	0.161094
	0.39479	0.119197
	0.240172	0.156682
	0.266679	0.111872
	0.369297	0.170701
	0.469884	0.0657218
	0.338907	0.0821423
	0.227429	0.115245
	0.409051	0.184523
	0.389871	0.10215
	0.375906	0.128376
	0.444323	0.143117
	0.265792	0.0677441
	0.100723	0.0550237
	0.326678	0.0711268
	0.335787	0.0900541
	0.247681	0.0911464
	0.369898	0.130859
	0.305361	0.0623862
	0.442993	0.221132
	0.232903	0.139944
	0.188005	0.137562
	0.33355	0.399634
	0.441076	0.261474
	0.4443	0.0908679
	0.357694	0.0725661
	0.447229	0.0736427
	0.638394	0.161486
	0.271143	0.161475
	0.423018	0.124224
	0.298686	0.150236
	0.520626	0.0657135
	0.392558	0.0731673
	0.213921	0.0797163
	0.323506	0.0704734
	0.341245	0.241914
	0.403355	0.101828
	0.401484	0.111564
	0.56025	0.0837383
	0.272621	0.0804954
	0.205469	0.0812564
	0.287239	0.116841
	0.27878	0.0495913
	0.334725	0.0440917
	0.295043	0.0788249
	0.312885	0.111175
	0.386308	0.0173632
	0.35121	0.15644
	0.316405	0.0248528
	0.354051	0.0232098
	0.159405	0.032594
	0.358787	0.0556092
	0.417474	0.0459659
	0.191737	0.0600484
	0.187279	0.13982
	0.245263	0.100124
	0.319543	0.0600185
	0.36593	0.0573202
	0.29146	0.0222459
	0.169857	0.0591888
	0.194809	0.147264
	0.202688	0.0349933
	0.245311	0.073595
	0.307092	0.0697501
	0.238969	0.121345
	0.234416	0.140607
	0.156971	0.0812738
	0.403942	0.0743089
	0.415386	0.0235952
	0.376761	0.0753586
	0.329197	0.173479
	0.344562	0.0776478
	0.290468	0.0257223
	0.404232	0.126696
	0.349183	0.0610716
	0.170976	0.096564
	0.282317	0.100738
	0.28287	0.101498
	0.0877813	0.0686317
	0.292628	0.0702198
	0.285551	0.0224627
	0.305617	0.093994
	0.233965	0.103751
	0.315347	0.0856944
	0.347192	0.0570687
	0.332923	0.0397644
	0.408297	0.0542558
	0.164913	0.0988464
	0.388836	0.0668449
	0.28385	0.0196601
	0.252725	0.0224916
	0.310216	0.0178571
	0.462858	0.0629771
	0.261253	0.0633969
	0.374715	0.0784859
	0.367166	0.0456249
	0.303734	0.0739979
	0.201412	0.0448306
	0.219425	0.0931475
	0.283725	0.126113
	0.289137	0.0925844
	0.2442	0.097561
	0.209962	0.0959978
	0.317222	0.0508794
	0.148148	0.0755778
	0.17442	0.0813774
	0.232916	0.0522117
	0.240754	0.0668772
	0.27092	0.0433735
	0.259612	0.128294
	0.337007	0.0552748
	0.334539	0.0824551
	0.367604	0.140618
	0.219364	0.174617
	0.176707	0.106696
	0.211977	0.139854
	0.220786	0.0784144
	0.269764	0.126231
	0.188959	0.0562681
	0.220856	0.0776951
	0.329823	0.0913006
	0.158813	0.0809112
	0.379996	0.0157325
	0.229458	0.0483456
	0.292288	0.0330051
	0.275174	0.0648393
	0.316629	0.0373949
	0.218452	0.0402029
	0.35907	0.0484589
	0.395652	0.05261
	0.304603	0.0587098
	0.326848	0.118912
	0.180825	0.0503261
	0.254034	0.0610475
	0.28179	0.134777
	0.0986661	0.0157165
	0.224305	0.0170814
		0.10153

## Sheet: Fig 4 Fig Sup 1 B Left
	No Damage No Darpin	No Damage Darpin
count	197	196
average	0.0356372	0.0312007
data	0.0144663	0.0458966
	0.0487533	0.0755405
	0.0178365	0.0305571
	0.0179716	0.0548042
	0.0338569	0.0515253
	0.0347301	0.0469447
	0.0344469	0.0316661
	0.0220094	0.0302605
	0.0337638	0.0434593
	0.0378347	0.0217347
	0.0486908	0.031076
	0.0376374	0.0238766
	0.0405379	0.0215809
	0.0322682	0.0362016
	0.0395606	0.0366097
	0.0276338	0.0242394
	0.0441096	0.0347296
	0.0440682	0.0385539
	0.0538224	0.0382947
	0.027584	0.0443312
	0.0353982	0.0128531
	0.0209902	0.0241558
	0.0360404	0.0206115
	0.027858	0.0181535
	0.0224411	0.0499799
	0.0213509	0.020061
	0.0250994	0.0160929
	0.0318727	0.0357252
	0.0350944	0.023614
	0.0373462	0.0298864
	0.0665109	0.0250159
	0.0230236	0.0406248
	0.0294635	0.0489068
	0.0502435	0.049111
	0.0434745	0.0277878
	0.0417194	0.0275913
	0.0259435	0.00402804
	0.045366	0.0234599
	0.0368565	0.00829653
	0.0307618	0.0204311
	0.0240488	0.0374334
	0.0201742	0.0181841
	0.0328438	0.0378431
	0.0145105	0.0253724
	0.0237189	0.0273719
	0.0151289	0.0501263
	0.00800181	0.00783713
	0.0268667	0.0243046
	0.0422298	0.0287212
	0.0219329	0.0308151
	0.0241601	0.0358938
	0.0421053	0.0139317
	0.0205181	0.0158679
	0.0220282	0.0192587
	0.0504467	0.0570594
	0.0236908	0.0344212
	0.0311032	0.0430636
	0.0341507	0.0336802
	0.0315297	0.0179035
	0.0196054	0.00857103
	0.0364473	0.0254818
	0.026625	0.0377035
	0.036955	0.0245317
	0.0235468	0.0270209
	0.0294679	0.0280042
	0.0424359	0.0169913
	0.0474519	0.0296728
	0.0841763	0.0210514
	0.0182096	0.0529058
	0.0204232	0.0593038
	0.00501473	0.0140274
	0.0220504	0.0183986
	0.01687	0.0258045
	0.0281416	0.0557341
	0.0318793	0.0470269
	0.0599077	0.0158818
	0.0433486	0.0286
	0.0292242	0.00921524
	0.0300291	0.01097
	0.0281495	0.00685433
	0.0210896	0.0332024
	0.031091	0.0438129
	0.0297957	0.0181335
	0.0391753	0.0607627
	0.034738	0.0278301
	0.0530738	0.0261813
	0.03861	0.0433929
	0.0285694	0.022042
	0.0331481	0.0303479
	0.0260125	0.0137718
	0.0638612	0.042823
	0.0590739	0.0284094
	0.0255356	0.00725431
	0.0266239	0.0212968
	0.0145433	0.0309289
	0.0299514	0.0130248
	0.0164443	0.0260494
	0.0295107	0.0183991
	0.0646666	0.018775
	0.0780101	0.0371364
	0.0199013	0.0442393
	0.0439492	0.0206727
	0.0401454	0.0131159
	0.0390785	0.0183681
	0.0502939	0.0500951
	0.0130904	0.013356
	0.0142868	0.0168608
	0.0231737	0.0197659
	0.0196685	0.018252
	0.0208848	0.0509023
	0.0362876	0.0354785
	0.0292675	0.0627784
	0.053369	0.0350019
	0.0224825	0.024675
	0.0225141	0.0243087
	0.0179721	0.029033
	0.0409385	0.0318359
	0.0482289	0.0165189
	0.035106	0.0228506
	0.104375	0.0264604
	0.0484715	0.0205184
	0.0594861	0.028665
	0.0211498	0.0474121
	0.0178928	0.0562297
	0.0500504	0.0247829
	0.0222574	0.0643964
	0.0267231	0.0310469
	0.0547256	0.0255369
	0.019844	0.0419905
	0.0291332	0.0417712
	0.0382809	0.0681523
	0.0388899	0.0189159
	0.0316867	0.0479626
	0.0837513	0.0151673
	0.0457579	0.0379593
	0.0351862	0.0304558
	0.0225411	0.00987306
	0.0254505	0.012909
	0.0193622	0.00927009
	0.0285686	0.0298635
	0.0220733	0.0160331
	0.045099	0.0298443
	0.0622064	0.0356406
	0.0695166	0.0414495
	0.0527378	0.0480712
	0.024249	0.0437616
	0.0340231	0.0275349
	0.0332243	0.0541031
	0.0204399	0.0613324
	0.0242314	0.0203418
	0.0255355	0.0394276
	0.0477043	0.0431953
	0.0337212	0.0409872
	0.0477073	0.0387824
	0.018289	0.0402351
	0.0426408	0.0524366
	0.0137848	0.0170495
	0.0480107	0.0327313
	0.0427017	0.0238904
	0.045045	0.0305203
	0.0430785	0.0472541
	0.0317668	0.0203999
	0.0234168	0.0154907
	0.0415108	0.0410622
	0.062827	0.0267197
	0.0479184	0.0507274
	0.0346469	0.0688409
	0.0353529	0.0158636
	0.0574268	0.0292994
	0.0387933	0.0248243
	0.0483821	0.0215035
	0.0633929	0.0321587
	0.0666939	0.0307601
	0.02311	0.0251634
	0.0868021	0.0421602
	0.0345509	0.0356802
	0.0374023	0.0128546
	0.0452727	0.0165845
	0.0219007	0.0436223
	0.0402077	0.0180366
	0.0178395	0.0517908
	0.0484769	0.0210806
	0.0526549	0.0324429
	0.0456777	0.0352543
	0.0376477	0.0259102
	0.0490133	0.0228808
	0.0466212	0.0471321
	0.0357655	0.0331316
	0.0343588	0.0235963
	0.0158776	0.0242205
	0.0392316	0.0267419
	0.016895	0.0480279
	0.035581	0.0330439
	0.0728178	0.0669758
	0.0252792	0.0123387
	0.0537037	0.0422685
	0.0303611

## Sheet: Fig 4 Fig Sup 1 B Right
	No Damage No Darpin	No Damage Darpin
count	202	206
average	0.0927687	0.0940771
data	0.0861694	0.0758407
	0.0940849	0.101258
	0.0811632	0.0591576
	0.114789	0.0734088
	0.0883587	0.0617043
	0.0668865	0.098714
	0.0525184	0.108554
	0.102305	0.10678
	0.0647593	0.0780202
	0.0673841	0.0717892
	0.0713343	0.112843
	0.085071	0.0669949
	0.0590629	0.0941382
	0.0839147	0.0703825
	0.176956	0.0908858
	0.124279	0.0377974
	0.0404264	0.0524114
	0.0548942	0.121629
	0.0813731	0.0707635
	0.0776326	0.142699
	0.0719676	0.126522
	0.046502	0.0903771
	0.0868345	0.0810829
	0.0671479	0.0756573
	0.0517479	0.0839123
	0.0524714	0.103534
	0.0988789	0.083613
	0.0794437	0.113707
	0.044481	0.144103
	0.0475207	0.112126
	0.0878488	0.105198
	0.117343	0.190196
	0.0780582	0.177461
	0.0741743	0.098203
	0.141877	0.1122
	0.155781	0.101278
	0.0729492	0.121544
	0.0616972	0.0919305
	0.0472152	0.135164
	0.0784046	0.0937449
	0.0567785	0.165089
	0.0520505	0.120573
	0.124144	0.137414
	0.0386288	0.0829609
	0.0456075	0.0906931
	0.0569092	0.0975874
	0.0320053	0.0798236
	0.0439859	0.0907416
	0.0408627	0.102228
	0.238319	0.163237
	0.121143	0.133696
	0.0718348	0.154751
	0.0767818	0.0955185
	0.0880092	0.0970725
	0.0601441	0.0901067
	0.0559494	0.0946743
	0.0499903	0.121596
	0.115299	0.0480217
	0.0785135	0.0777238
	0.0705114	0.0648254
	0.0656272	0.0721539
	0.0698546	0.144714
	0.081813	0.0985606
	0.0621648	0.121442
	0.0867081	0.118949
	0.137663	0.107176
	0.0843994	0.0585996
	0.0725201	0.0549804
	0.153877	0.0431726
	0.0990774	0.106895
	0.129676	0.0634217
	0.075494	0.0604799
	0.0824667	0.064512
	0.102018	0.0818225
	0.0541088	0.0630759
	0.072901	0.0757874
	0.116233	0.065991
	0.06831	0.113351
	0.124699	0.0525827
	0.110522	0.0626533
	0.104547	0.11067
	0.101906	0.0661586
	0.0433351	0.145612
	0.0644939	0.103177
	0.147034	0.115831
	0.136256	0.0779662
	0.0729449	0.0628885
	0.0690888	0.140403
	0.120372	0.091427
	0.0309333	0.0762276
	0.0678119	0.0968606
	0.126477	0.0965389
	0.10308	0.125922
	0.0993711	0.115576
	0.146822	0.100764
	0.127062	0.0736263
	0.124376	0.130112
	0.0783895	0.0735965
	0.131454	0.0733719
	0.133768	0.0538775
	0.0892479	0.0677428
	0.0637473	0.133406
	0.0410522	0.108297
	0.0603188	0.0717887
	0.0699479	0.0943302
	0.0680194	0.150553
	0.0761656	0.170269
	0.101781	0.211173
	0.049252	0.101673
	0.0828231	0.0860471
	0.124821	0.100059
	0.0654336	0.115877
	0.11453	0.118159
	0.0596505	0.169757
	0.0538672	0.0804851
	0.100988	0.0506284
	0.116424	0.0804112
	0.151066	0.0767726
	0.0998933	0.0969813
	0.0967675	0.112766
	0.04444	0.0885219
	0.0658271	0.123542
	0.0934682	0.132706
	0.0952916	0.0963356
	0.053468	0.136179
	0.0555657	0.143177
	0.0754557	0.0815203
	0.0732348	0.0681242
	0.126871	0.0524063
	0.101228	0.071579
	0.0745541	0.102302
	0.0896578	0.0988781
	0.0541494	0.0842187
	0.0889484	0.0847708
	0.115282	0.0604499
	0.12818	0.131544
	0.095508	0.0773886
	0.11196	0.0480942
	0.0765773	0.140749
	0.125426	0.0649465
	0.121866	0.0651081
	0.057501	0.0615149
	0.124475	0.0914398
	0.0753364	0.0746447
	0.0750259	0.0669892
	0.112442	0.125643
	0.071894	0.0846489
	0.104985	0.060544
	0.183631	0.0455487
	0.087464	0.0412012
	0.0542041	0.0745039
	0.0962499	0.0857723
	0.0373034	0.0404556
	0.0718223	0.063148
	0.0999705	0.0454926
	0.0758392	0.0739405
	0.119561	0.0361451
	0.0878567	0.0951096
	0.133468	0.0809369
	0.145265	0.124309
	0.0730673	0.0669608
	0.0724847	0.0568699
	0.106732	0.107744
	0.0922562	0.123094
	0.0798412	0.0561552
	0.160433	0.103516
	0.106313	0.10486
	0.165716	0.0849244
	0.14741	0.128058
	0.172405	0.109536
	0.148514	0.087119
	0.128341	0.073264
	0.212678	0.10975
	0.180542	0.101879
	0.257763	0.134206
	0.13968	0.107153
	0.134508	0.112659
	0.128824	0.0942708
	0.12862	0.150398
	0.131614	0.106754
	0.271488	0.130772
	0.20537	0.0821474
	0.059317	0.145447
	0.0837322	0.194626
	0.0514952	0.0890032
	0.0586285	0.110233
	0.0921493	0.0693128
	0.0438232	0.0765955
	0.0603873	0.0493258
	0.0888175	0.0500865
	0.0801813	0.082071
	0.119811	0.0629699
	0.0734358	0.153849
	0.0827867	0.148465
	0.0688891	0.0761678
	0.0543251	0.0375173
	0.071757	0.0415668
	0.0646167	0.158604
	0.0906173	0.04876
	0.101587	0.0527708
	0.0742141	0.0458181
	0.0742345	0.064919
		0.0402293
		0.0713777
		0.0736474
		0.0761486
