# Supplementary material for: Rapid binding to protofilament edge sites facilitates tip tracking of EB1 at growing microtubule plus-ends
Source: eLife. 2024 Feb 22;13:e91719. doi: 10.7554/eLife.91719 (PMC10883673; doi:10.7554/eLife.91719)
Supplement: Figure 4—source data 1. [file elife-91719-fig4-data1.xlsx]

## Sheet: Fig 4 B left
	Damaged No Darpin	Damaged Darpin
n	199	197
average	0.279335	0.105277
data	0.301589	0.0795561
	0.168499	0.174414
	0.243555	0.2032
	0.504202	0.105326
	0.132547	0.259303
	0.284416	0.209067
	0.207128	0.114757
	0.302768	0.0537378
	0.213263	0.0641315
	0.328982	0.15488
	0.291535	0.0316067
	0.303916	0.0972579
	0.250716	0.220043
	0.120624	0.0501376
	0.230415	0.0466102
	0.161822	0.0758199
	0.128792	0.111322
	0.0728279	0.034552
	0.170842	0.217503
	0.378422	0.1184
	0.187767	0.0525739
	0.190781	0.12815
	0.40024	0.0792743
	0.170154	0.115719
	0.215376	0.0683719
	0.464887	0.119266
	0.217436	0.106831
	0.430082	0.120113
	0.175563	0.113074
	0.418459	0.0661424
	0.19733	0.10827
	0.225819	0.0986518
	0.319719	0.0580324
	0.216161	0.0443793
	0.262715	0.12171
	0.541001	0.0350749
	0.479633	0.0781686
	0.144246	0.102544
	0.186556	0.210236
	0.279259	0.0918588
	0.181782	0.127293
	0.204383	0.0732394
	0.533845	0.0501171
	0.286677	0.0509996
	0.389415	0.0688406
	0.328905	0.0833667
	0.205709	0.229388
	0.177784	0.0486936
	0.186742	0.149484
	0.400839	0.0994402
	0.28165	0.125808
	0.362606	0.0927801
	0.34169	0.139609
	0.268679	0.309492
	0.293667	0.0536936
	0.356365	0.187032
	0.23552	0.0707598
	0.318626	0.0953507
	0.225397	0.0517541
	0.295042	0.115617
	0.280228	0.0515171
	0.218292	0.120981
	0.315999	0.140888
	0.208009	0.14211
	0.419842	0.168326
	0.210877	0.0800788
	0.491681	0.0573811
	0.402028	0.0660893
	0.134921	0.15051
	0.240175	0.0372588
	0.252655	0.113408
	0.511708	0.0544467
	0.261553	0.051105
	0.389049	0.144618
	0.248656	0.246828
	0.244632	0.0716565
	0.133921	0.0856816
	0.17803	0.0659637
	0.285601	0.0837131
	0.176619	0.0694286
	0.210017	0.0754932
	0.203665	0.115154
	0.274391	0.0520769
	0.363918	0.130358
	0.388316	0.0280802
	0.216855	0.0764549
	0.265609	0.0752454
	0.189563	0.107532
	0.226428	0.112467
	0.416585	0.0527834
	0.350244	0.00996016
	0.266947	0.0479566
	0.337377	0.0536799
	0.322243	0.129551
	0.282804	0.0431362
	0.315819	0.125023
	0.331527	0.106701
	0.177347	0.0636758
	0.2989	0.0328638
	0.279219	0.161799
	0.143579	0.0363548
	0.384629	0.0937707
	0.247024	0.0246034
	0.214665	0.095788
	0.181305	0.0299284
	0.259031	0.090269
	0.19932	0.112892
	0.171397	0.264961
	0.281589	0.153719
	0.329355	0.0391276
	0.402242	0.0658416
	0.262826	0.0638165
	0.268193	0.0142594
	0.280093	0.102909
	0.175802	0.0238761
	0.172255	0.0299371
	0.228416	0.158672
	0.30823	0.124232
	0.270812	0.168266
	0.196267	0.147291
	0.174669	0.00480559
	0.278138	0.0770289
	0.137965	0.121365
	0.221632	0.0126582
	0.369176	0.0878034
	0.241326	0.0783637
	0.300886	0.0457906
	0.172404	0.0322949
	0.214908	0.11712
	0.37041	0.0462937
	0.273747	0.121808
	0.255012	0.0784106
	0.196378	0.082229
	0.373774	0.0684967
	0.235557	0.0426746
	0.269765	0.0923723
	0.248988	0.142469
	0.251184	0.166708
	0.207843	0.180666
	0.348533	0.12266
	0.252636	0.126731
	0.420907	0.146121
	0.316521	0.0549488
	0.223745	0.116312
	0.424578	0.310924
	0.297674	0.240038
	0.261709	0.154996
	0.199394	0.125359
	0.187361	0.116616
	0.189532	0.180299
	0.268047	0.232392
	0.130374	0.210749
	0.387771	0.0722807
	0.187497	0.116872
	0.231023	0.175391
	0.119526	0.0293542
	0.360136	0.151667
	0.280321	0.0978556
	0.147413	0.118357
	0.273939	0.0401515
	0.332577	0.0258193
	0.245315	0.185351
	0.223466	0.196303
	0.275913	0.128721
	0.350367	0.0551286
	0.219228	0.163881
	0.232445	0.0466149
	0.356428	0.38375
	0.371716	0.0949515
	0.370351	0.150427
	0.438185	0.0509153
	0.257549	0.127128
	0.43142	0.0225564
	0.381601	0.0449102
	0.359264	0.042058
	0.374136	0.0838981
	0.288904	0.0338107
	0.238509	0.0820265
	0.452955	0.0932424
	0.223671	0.0906863
	0.498421	0.145557
	0.383647	0.235013
	0.23595	0.0696864
	0.333451	0.0383318
	0.215506	0.180574
	0.315206	0.155603
	0.29137	0.130983
	0.354211	0.0309179
	0.349643	0.120155
	0.259932	0.0433272
	0.255697	0.241186
	0.426502	0.127579
	0.354791	0.0896539
	0.225862	0.256223
	0.390026	0.0762288
	0.372995	0.0889051
	0.18138	0.0627722
	0.415729
	0.306293

## Sheet: Fig 4 B right
	Undamaged No Darpin	Undamaged Darpin
n	208	240
average	0.068282	0.0700794
data	0.0656792	0.0552795
	0.067651	0.129019
	0.0538965	0.0909457
	0.0560002	0.0908588
	0.0449099	0.0786535
	0.0265513	0.055263
	0.0593807	0.0949453
	0.0500665	0.112
	0.0460446	0.0375151
	0.0844162	0.0502224
	0.0581735	0.0831951
	0.0703455	0.0775574
	0.0684229	0.0616468
	0.079206	0.135621
	0.0485996	0.0704576
	0.102668	0.0892469
	0.0813866	0.0537084
	0.0411209	0.0733794
	0.0549337	0.0771782
	0.0663215	0.0232274
	0.0438951	0.11841
	0.0636315	0.099889
	0.0427591	0.0835132
	0.0807758	0.10116
	0.0357042	0.0602177
	0.0407575	0.104958
	0.104939	0.067728
	0.0452026	0.104766
	0.100619	0.079309
	0.0190068	0.0775665
	0.0663696	0.117505
	0.105389	0.0657255
	0.0417478	0.053276
	0.0408199	0.0393249
	0.0431305	0.0547996
	0.0401623	0.0910866
	0.0386944	0.0628161
	0.0445113	0.146473
	0.0603336	0.0818175
	0.0170617	0.0495623
	0.0578433	0.070536
	0.0420789	0.0352756
	0.0242136	0.089474
	0.0250874	0.0741918
	0.0904399	0.081249
	0.0813189	0.0896891
	0.0580941	0.152538
	0.0341332	0.0640824
	0.0288363	0.105164
	0.0420484	0.0609288
	0.0752466	0.134377
	0.0344004	0.0672866
	0.0387799	0.142606
	0.0514174	0.143428
	0.0708761	0.0585994
	0.0864591	0.0620392
	0.112196	0.0626666
	0.0568023	0.0649868
	0.0487156	0.0662026
	0.0492872	0.112383
	0.0380895	0.151357
	0.0234797	0.0514098
	0.0825053	0.103065
	0.0316651	0.0588823
	0.036774	0.156355
	0.0380001	0.0743568
	0.0159806	0.0819191
	0.0636421	0.0852106
	0.0576504	0.0579328
	0.0633266	0.0866055
	0.0666534	0.0345622
	0.0564132	0.0271679
	0.0986362	0.0510883
	0.0890457	0.0696647
	0.101745	0.0404769
	0.0228821	0.0583002
	0.0347809	0.0631948
	0.0659737	0.0295783
	0.100422	0.0773278
	0.124677	0.0956975
	0.0654771	0.0503614
	0.0752205	0.0198235
	0.0755575	0.0251136
	0.0599993	0.0276229
	0.0513122	0.042196
	0.074731	0.155716
	0.064791	0.224289
	0.120643	0.150439
	0.0496459	0.301534
	0.0296209	0.118319
	0.083213	0.102609
	0.0457427	0.0456361
	0.0490817	0.0500338
	0.209541	0.0901091
	0.0531425	0.14334
	0.0717551	0.0713112
	0.0424131	0.109307
	0.0335128	0.0788015
	0.0762537	0.0778054
	0.0534043	0.0717534
	0.0335436	0.129828
	0.0667837	0.0898784
	0.0406652	0.169873
	0.0262134	0.103566
	0.0255486	0.0609543
	0.123902	0.104288
	0.0119236	0.084384
	0.111767	0.0900733
	0.0848095	0.081026
	0.118372	0.125771
	0.0778151	0.138147
	0.0772007	0.0559384
	0.114247	0.0664135
	0.139634	0.0505095
	0.0425518	0.044923
	0.0997817	0.0817565
	0.0223918	0.0401457
	0.0738492	0.0866185
	0.0372167	0.0361672
	0.0346411	0.110446
	0.10662	0.0472023
	0.025011	0.0454458
	0.0775261	0.0560886
	0.111049	0.0618368
	0.0711791	0.172366
	0.0868065	0.0706202
	0.0655564	0.0474888
	0.117667	0.0798293
	0.0247449	0.0458805
	0.0904569	0.0542726
	0.0647137	0.0467579
	0.0407234	0.0773954
	0.0624816	0.0306745
	0.0730086	0.0481468
	0.0968897	0.0437727
	0.0411681	0.0774186
	0.0496818	0.0563874
	0.0541897	0.0698795
	0.0554165	0.0553573
	0.0478699	0.0638602
	0.0357672	0.0205897
	0.052253	0.0462285
	0.131515	0.0251706
	0.0795808	0.0306744
	0.0574072	0.0432846
	0.0587254	0.0457878
	0.0662168	0.0359086
	0.0807534	0.0383043
	0.0889185	0.0607302
	0.0697304	0.0524971
	0.0437415	0.0718927
	0.0979508	0.0229211
	0.0446409	0.0769885
	0.150931	0.0943941
	0.0481987	0.0638704
	0.0646123	0.0621526
	0.0432791	0.0505286
	0.0763526	0.0947753
	0.081498	0.112468
	0.0854349	0.069471
	0.125881	0.0706699
	0.118537	0.0697616
	0.105225	0.0435998
	0.0598901	0.0731575
	0.0539039	0.0736428
	0.100943	0.0280411
	0.0210463	0.0253616
	0.0810206	0.0599237
	0.173239	0.0978058
	0.0721718	0.0229338
	0.0810611	0.056361
	0.0588438	0.0641696
	0.0814607	0.0371477
	0.125619	0.0513284
	0.120512	0.0410304
	0.0636494	0.0511506
	0.0506592	0.0537996
	0.0565759	0.0602682
	0.0623166	0.0456927
	0.0770655	0.0397842
	0.0836495	0.0411598
	0.0441142	0.0726707
	0.0854025	0.0752746
	0.0794227	0.0740682
	0.0658991	0.0304581
	0.116907	0.0421787
	0.11882	0.0278491
	0.0958227	0.0512502
	0.0818073	0.0704824
	0.0685872	0.0577359
	0.111155	0.0673638
	0.0823832	0.0423026
	0.116482	0.0328585
	0.0260738	0.0821247
	0.100604	0.02458
	0.0585346	0.0918999
	0.046342	0.0290228
	0.0594988	0.0537797
	0.0761915	0.0582231
	0.15066	0.0543998
	0.0551628	0.0202514
	0.0603007	0.0265453
	0.0865173	0.0389414
	0.131634	0.0329454
	0.0897983	0.0739246
	0.0687076	0.0582648
	0.0827264	0.0715826
	0.0797509	0.0367497
		0.061775
		0.0556723
		0.0355812
		0.0488177
		0.0594142
		0.0442014
		0.0656372
		0.0269223
		0.0436551
		0.0544877
		0.0589113
		0.0261394
		0.0438642
		0.0612095
		0.0156381
		0.0610258
		0.0456509
		0.0272171
		0.076042
		0.0499197
		0.0672277
		0.0968852
		0.0970099
		0.137631
		0.122655
		0.0465132
		0.0271839
		0.103073
		0.0310377
		0.0837428
		0.0381903
		0.0337845
