# Supplementary material for: Rapid binding to protofilament edge sites facilitates tip tracking of EB1 at growing microtubule plus-ends
Source: eLife. 2024 Feb 22;13:e91719. doi: 10.7554/eLife.91719 (PMC10883673; doi:10.7554/eLife.91719)
Supplement: Figure 5—source data 1. [file elife-91719-fig5-data1.xlsx]

## Sheet: Fig 5A right big
	1X fold change	0.7X fold change	0.18X fold change			fold change	Fold change in Tip Specificity
n	89	33	36			1	1
median	1	0.866189	0.525345			0.7	0.866189
std error of the median	0.0192978	0.0207129	0.0227306			0.18	0.525345
data	1.63662	0.90684	0.557614
	1.25928	0.880805	0.816703
	0.987248	0.583172	0.459318
	1.51633	0.808885	0.507983
	0.886537	2.39383	0.420761
	1.31247	0.862027	0.618989
	0.915649	0.917329	0.666198
	0.692039	0.547999	0.291539
	1.28571	1.04127	0.399737
	0.780314	0.942641	1.09296
	1.33855	1.68374	0.511283
	0.932182	0.881871	0.486804
	1.00532	0.907981	0.533907
	0.576155	0.796487	0.860207
	0.934619	0.700761	0.355457
	0.746871	0.694566	0.641249
	0.827008	0.793121	0.502984
	0.912663	0.716064	0.567816
	0.91561	1.20718	0.435009
	0.78733	0.827028	0.305678
	1.36859	1.36673	0.375391
	1.59506	1.23509	0.886537
	1.3002	0.800298	0.563314
	0.776489	1.12178	0.476913
	0.926496	1.27946	0.372937
	1.33846	0.825813	0.533827
	0.855646	0.934227	0.484796
	1.09713	1.71172	0.554015
	1.29493	0.785934	0.513292
	0.903021	0.866189	0.714502
	1.93514	0.813903	1.08851
	1	0.696498	0.566363
	1.07538	0.527379	0.640491
	0.508927		0.781781
	0.934582		0.446378
	1.38718		0.516863
	1.36467
	3.19756
	0.777368
	0.961584
	0.920499
	0.748396
	0.738715
	1.06816
	0.775671
	0.883236
	1.17781
	1.71677
	1.18725
	0.789836
	0.778096
	1.23173
	0.774355
	0.923722
	0.659239
	0.878959
	1.38479
	0.744556
	0.789054
	1.01821
	1.00564
	1.28441
	0.907082
	0.771121
	1.28771
	0.998772
	1.0243
	1.49532
	1.81272
	1.10799
	1.47537
	2.31781
	1.89221
	1.43195
	1.48501
	1.05439
	1.49377
	1.00057
	1.44487
	0.977607
	0.768884
	1.0999
	0.833684
	1.42632
	1.1657
	0.87891
	0.80788
	0.795399
	0.999259

## Sheet: Fig 5A right inset
	1X fold change	0.7X fold change	0.18X fold change
n	89	33	36			Fold change	Tip Specificity
median	4.92683	4.26757	2.58829			1	4.92683
std error of the median	0.095077	0.102049	0.11199			0.7	4.26757
						0.18	2.58829
data	8.06337	4.46784	2.74727
	6.20427	4.33958	4.02376
	4.864	2.87319	2.26298
	7.47069	3.98524	2.50275
	4.36782	11.794	2.07302
	6.46631	4.24706	3.04966
	4.51124	4.51952	3.28225
	3.40956	2.6999	1.43636
	6.33448	5.13014	1.96944
	3.84447	4.64423	5.38484
	6.59479	8.29551	2.51901
	4.5927	4.34483	2.3984
	4.95305	4.47347	2.63047
	2.83862	3.92416	4.2381
	4.60471	3.45253	1.75127
	3.6797	3.42201	3.15932
	4.07453	3.90757	2.47811
	4.49653	3.52792	2.79753
	4.51105	5.94755	2.14321
	3.87904	4.07463	1.50602
	6.7428	6.73362	1.84949
	7.85861	6.08506	4.36782
	6.40586	3.94293	2.77535
	3.82563	5.5268	2.34967
	4.56469	6.30369	1.8374
	6.59438	4.06864	2.63008
	4.21562	4.60278	2.38851
	5.40536	8.43333	2.72954
	6.37989	3.87216	2.5289
	4.44903	4.26757	3.52023
	9.53409	4.00996	5.36288
	4.92683	3.43152	2.79037
	5.29822	2.59831	3.15559
	2.5074		3.8517
	4.60453		2.19923
	6.83438		2.5465
	6.72351
	15.7538
	3.82996
	4.73756
	4.53514
	3.68722
	3.63952
	5.26263
	3.8216
	4.35155
	5.80288
	8.45821
	5.84935
	3.89139
	3.83355
	6.06854
	3.81512
	4.55102
	3.24796
	4.33048
	6.82261
	3.6683
	3.88754
	5.01656
	4.95462
	6.32806
	4.46904
	3.79918
	6.34431
	4.92078
	5.04655
	7.36719
	8.93096
	5.45888
	7.26888
	11.4195
	9.32258
	7.05499
	7.31641
	5.19482
	7.35953
	4.92965
	7.11861
	4.8165
	3.78816
	5.41903
	4.10742
	7.02725
	5.7432
	4.33024
	3.98028
	3.91879
	4.92318

## Sheet: Fig 5B right Big
	0 uM rep1	0.25 uM rep1	1 uM rep1	0 uM rep2	0.25 uM rep2	1 uM rep2	0 uM rep3	0.25 uM rep3	1 uM rep3			concentration	Fold change in tip specificity
n	130	62	103	105	97	91	113	142	82			0	1
median	1	0.87235	0.651601	1	1.04481	0.856825	1	0.953757	0.787934			0.25	0.87235
std error of the median	0.0483074	0.0505378	0.0286704	0.0461346	0.0465275	0.0507395	0.0592208	0.0480323	0.0392497			1	0.651601
												0	1
	1.45944	4.04674	0.745264	1.6477	2.24511	1.46424	2.54944	1.23217	0.694568			0.25	1.04481
	0.361756	0.552924	1.04364	0.726974	1.07257	0.930275	0.888379	1.61684	0.791991			1	0.856825
	0.678629	0.939838	1.36638	0.63039	0.951446	0.361072	0.278633	1.47417	0.54735			0	1
	1.18052	0.863562	0.742986	0.995006	0.896227	2.29833	1.1881	0.608577	0.714227			0.25	0.953757
	1.82768	0.900875	3.64451	2.90246	0.622857	0.623938	0.571974	1.65782	0.637477			1	0.787934
	0.755437	0.831389	1.23882	0.672456	0.87521	0.0730287	0.718764	5.62912	0.670432
	1.37232	0.824638	1.00793	0.800392	0.944041	0.694335	0.487344	0.815515	0.969319
	1.9195	1.96109	0.651601	0.962808	1.42723	0.428025	0.616327	0.867275	1.57543
	1.28348	0.514377	1.61877	0.786477	0.590249	1.20404	7.8595	0.0789411	1.44377
	0.936074	3.8521	0.345547	0.676093	0.881615	0.909216	0.434132	1.22933	0.401858
	0.670805	1.05912	0.274167	2.14355	0.783862	0.508925	0.747141	0.659557	0.772558
	1.25193	0.713741	0.392145	0.376644	1.53299	1.14239	0.642997	0.433467	0.502819
	0.64471	0.575093	0.643873	0.581052	0.682826	0.856825	1.47771	0.757858	1.90599
	2.29736	0.745093	1.78675	1.58143	1.4208	0.602844	0.679691	0.681096	0.377348
	3.19288	1.36453	0.500854	1.22091	0.874868	1.27573	0.893822	0.54694	2.00208
	1.25191	1.89058	0.499226	0.885641	0.756721	0.530528	0.57539	1.30345	2.58288
	0.51232	0.897118	0.855663	0.622932	0.807717	1.04144	0.681648	2.64335	1.70816
	1.08727	0.82218	0.410502	1.16847	1.64377	1.18546	0.595469	0.710107	0.686111
	1.04925	0.534328	0.467998	1.29096	1.42726	0.759313	0.526652	0.150926	0.570679
	1.58547	0.992156	0.421027	1.67699	0.420919	0.530361	0.567695	0.786652	0.376207
	0.594495	2.06542	0.545942	13.0875	1.3147	0.46164	0.557709	0.583867	0.713533
	1.10639	0.616749	0.496922	0.947996	1.61032	0.600207	2.57618	0.505297	0.626691
	0.774005	0.912303	0.559517	0.91158	1.05286	0.836353	0.489164	0.328655	1.03171
	1.21909	0.516819	0.838555	1.55582	0.549352	0.600997	0.544713	0.742487	1.64457
	0.771682	0.87332	0.464242	0.895567	0.515845	0.955596	0.601082	0.848233	0.696214
	1.00303	0.752698	0.768211	0.602297	0.929466	1.25223	44.7899	0.614848	0.531687
	26.5467	0.981613	0.982534	0.777016	0.6608	0.692984	1.43971	0.766611	1.24547
	0.478896	0.630811	0.540112	2.33041	1.22642	0.976587	1.01464	0.561358	0.689721
	0.713872	0.801819	0.485581	1.36935	1.07858	0.657702	53.2892	2.20625	6.15187
	1.11751	2.59733	0.583865	1.29246	0.815132	0.738158	3.90247	0.737799	1.02963
	0.325289	0.208577	0.468989	0.482458	0.83011	1.50311	0.869612	0.743888	1.14806
	1.8887	4.16493	0.185274	1.45861	1.10797	0.681152	3.08145	1.87769	0.908348
	0.612878	0.802592	0.538276	3.08461	1.58089	0.91322	1.48318	2.5137	0.974918
	0.50573	1.30475	0.45886	1.14162	1.04481	0.207091	2.66463	0.467058	0.660599
	0.762528	0.568269	0.520541	1.10559	0.82591	1.51663	1.11086	0.870616	0.609137
	0.728856	0.65175	0.385924	0.907714	1.07498	1.96785	2.11104	1.69697	0.783878
	11.5586	0.457539	0.296418	1.47221	1.23626	1.98743	6.46357	1.81324	1.03549
	1.02384	0.968081	0.591635	1.52302	1.42932	0.676441	1.88288	0.689281	1.50826
	0.924775	1.07259	0.762702	1.90926	0.790573	0.488955	0.798602	1.65271	0.59114
	0.67083	1.52189	0.284709	1.42977	3.75552	1.8204	1.25624	0.387336	1.12835
	0.747826	0.650748	0.441801	1.05629	0.714004	0.26421	6.50397	0.296692	0.963242
	0.650295	4.9022	0.639919	1.69865	2.57841	0.925422	1.63772	0.63793	0.851525
	0.622024	2.1913	2.47656	0.618909	1.50497	0.669001	0.908323	0.554911	0.241733
	1.84021	0.837117	1.4183	0.829203	0.457942	4.1811	0.805392	0.54534	0.702492
	0.72425	0.871379	2.1256	0.774865	1.52874	2.32653	0.97479	1.0192	0.93854
	0.646266	1.39949	1.50362	0.700271	0.792763	1.21484	6.69629	1.12669	0.367706
	3.80705	0.777219	0.986014	1.10637	0.816747	1.07253	1.07352	5.08277	1.20996
	0.911024	1.15356	0.857031	0.655182	1.98833	0.671154	1.81594	2.24616	0.54454
	1.26915	0.899536	0.46755	0.856627	2.53289	1.02732	1.0474	2.18459	1.06208
	1.10624	0.4742	0.876422	1.2741	1.34839	1.93392	9.89336	1.41236	1.1427
	1.02186	0.450543	0.672995	0.450634	2.4843	0.965759	0.546814	1.31226	1.09968
	3.28157	0.582697	0.467032	2.22304	2.56893	1.81352	0.544305	0.892238	0.739334
	0.971001	0.830262	1.13607	7.23827	0.825952	0.812828	1.1542	1.34281	0.112425
	0.864279	1.23441	1.0208	0.646016	184.195	0.838963	1.6911	0.376714	0.879017
	0.591426	1.9438	0.972343	0.54593	2.05225	1.13931	1	0.365495	0.454955
	1.29912	6.32399	3.83262	1.05281	0.86591	0.849327	0.699531	0.564674	0.945981
	0.456592	1.25738	0.488724	0.720094	5.394	0.640066	1.57512	3.95005	1.35795
	0.413651	0.634083	1.20076	0.681136	1.0757	3.93775	0.858586	3.86024	0.549079
	0.657655	1.04903	0.814666	1.46874	2.49881	1.65553	2.65555	0.517461	0.925893
	0.960098	1.1779	0.4852	0.808618	0.517757	0.908419	0.256078	0.900888	1.23273
	0.447678	0.66065	2.40945	0.52877	0.944587	1.77142	0.322181	1.15975	0.721214
	0.926917	0.560315	0.825362	1.33418	1.12756	0.157984	0.703164	1.11019	3.34735
	0.567107		1.06261	1.22663	0.936566	1.66241	0.942588	0.653837	1.34909
	1.31418		10.0059	0.853405	1.22539	0.661884	133.111	0.877891	0.937882
	2.49989		0.700424	0.742828	1.37384	0.589535	1.17994	0.849673	0.847476
	1.47845		0.609968	0.566345	1.02263	0.423543	0.934079	0.693064	0.689806
	1.40291		0.28105	0.69633	16.8845	0.592501	1.90687	0.534627	0.862958
	1.82699		2.55338	1.63247	2.96534	0.633551	4.61288	1.02056	0.475261
	1.69723		1.25384	0.753128	1.16955	0.754848	1.46031	1.00916	0.737592
	1.72413		0.780757	1.04899	3.28736	0.361974	0.781255	1.2118	0.737932
	1.20857		0.792214	1.49582	2.71825	0.333659	1.34042	1.48409	0.492451
	0.605556		0.592595	6.69611	0.906126	1.12326	1.00683	1.96022	0.390606
	0.644834		0.525961	1	0.633586	0.827248	0.570467	1.01521	0.468984
	1.4844		0.455341	0.55213	0.674896	0.57516	0.929656	0.885677	0.810794
	1.45609		0.685493	0.616239	0.712376	1.81218	1.57998	0.660833	0.700425
	3.49553		0.458046	0.868772	0.714529	1.35563	1.14619	1.76168	0.741096
	0.989401		0.65088	0.681267	0.756373	0.477802	0.83885	0.463916	1.62061
	1.44986		0.588571	1.55101	5.34908	2.40361	0.809842	1.0016	0.581071
	0.613881		1.04603	0.805629	0.489419	0.395199	1.29863	2.45008	0.872347
	0.931464		0.560986	1.41241	0.842515	0.592054	0.390457	4.58323	0.816491
	0.525007		1.40861	0.909741	5.22552	0.528362	2.43587	1.99627	0.413611
	0.441865		0.838495	1.27701	1.31202	0.766931	0.7509	1.95995	1.21298
	0.505184		0.418411	2.64065	1.35391	3.18624	0.64442	0.924168
	0.629333		2.90125	1.98664	2.41499	1.18411	2.45233	0.390562
	0.384945		0.52092	0.730534	1.01931	2.02614	1.82708	2.10323
	0.553248		1.01532	0.459041	0.814026	0.58362	1.8069	0.744598
	0.931194		0.587019	0.88525	0.771863	1.84464	0.497381	0.9748
	0.894475		0.671726	0.829005	1.01186	1.1749	1.95379	6.73798
	0.95396		0.480922	1.98593	1.37183	2.37918	1.28858	2.70113
	0.694557		0.991213	0.926658	0.508454	1.62158	0.384525	0.391514
	1.37381		1.06388	0.896032	0.926284	1.92644	1.05506	0.947415
	1.95999		0.287978	0.560592	1.2298		1.14504	2.74725
	8.55253		0.487861	1.8543	0.501165		0.795542	1.00131
	2.29306		0.464717	0.736778	1.27573		0.680517	0.488115
	2.09841		1.27051	1.07498	0.497704		3.34136	2.44885
	0.532101		1.52341	1.10151	1.19269		0.613472	2.50249
	1.04992		1.67523	1.01431	0.821734		0.91597	1.21432
	0.50704		3.84634	2.41772			1.39437	0.598873
	2.56335		0.514445	1.08045			1.24799	0.557202
	1.03698		0.486121	2.12472			0.589816	0.84943
	1.57453		0.628009	1.24566			1.30344	1.05569
	2.0968		0.350844	1.63168			1.67746	1.33881
	1.2571		1.46958	0.992374			0.524319	1.05702
	2.11821			1.2537			1.76008	1.0438
	1.28711			5.64753			0.93213	0.485359
	0.916978						0.815818	0.445527
	0.856086						0.787644	0.51189
	1.9632						0.689585	0.536482
	1.75355						1.51684	0.903816
	0.60759						0.978614	0.909464
	0.944695						1.43658	2.7127
	1.47857						0.827726	3.41636
	5.85655						3.44538	1.32172
	1.6587							1.39148
	0.657504							1.07759
	0.64963							0.472675
	0.523453							0.993791
	0.957966							2.01407
	1.0089							1.90327
	0.689606							1.16414
	1.03175							1.15245
	0.753141							1.59995
	0.99697							0.764694
	3.14421							0.87057
	1.01964							1.93835
	1.0139							0.999878
	6.16943							0.660375
	0.835081							0.813608
	1.53183							5.9802
	0.528394							0.57639
								11.3324
								1.38082
								0.273063
								1.17574
								1.08357
								0.960099
								0.917842
								1.44439
								0.566697
								0.703266
								0.781908
								0.787543

## Sheet: Fig 5B Inset
	0 uM rep1	0.25 uM rep1	1 uM rep1	0 uM rep2	0.25 uM rep2	1 uM rep2	0 uM rep3	0.25 uM rep3	1 uM rep3		Concentration	Tip Specificity
n	130	62	103	105	97	91	113	142	82		0	1.96823
median	1.96823	1.71698	1.2825	1.62871	1.70169	1.39552	2.22371	2.12088	1.75214		0.25	1.71698
std error of the median	0.09508	0.09947	0.05643	0.07514	0.07578	0.08264	0.13169	0.10681	0.08728		1	1.2825
											0	1.62871
data	2.87252	7.96491	1.46685	2.68363	3.65664	2.38482	5.66923	2.74	1.54452		0.25	1.70169
	0.712018	1.08828	2.05412	1.18403	1.74691	1.51515	1.9755	3.59539	1.76116		1	1.39552
	1.3357	1.84982	2.68934	1.02672	1.54963	0.588083	0.6196	3.27813	1.21715		0	2.22371
	2.32353	1.69969	1.46237	1.62058	1.4597	3.74332	2.642	1.3533	1.58824		0.25	2.12088
	3.59729	1.77313	7.17323	4.72727	1.01446	1.01622	1.27191	3.68651	1.41757		1	1.75214
	1.48687	1.63636	2.43829	1.09524	1.42547	0.118943	1.59833	12.5175	1.49085
	2.70103	1.62308	1.98384	1.30361	1.53757	1.13087	1.08371	1.81347	2.15549
	3.77802	3.85987	1.2825	1.56814	2.32455	0.69713	1.37054	1.92857	3.50331
	2.52618	1.01241	3.18611	1.28095	0.961347	1.96104	17.4773	0.175542	3.21053
	1.84241	7.58182	0.680115	1.10116	1.4359	1.48085	0.965385	2.73367	0.893617
	1.3203	2.08459	0.539623	3.49123	1.27669	0.828892	1.66143	1.46667	1.71795
	2.46408	1.40481	0.771831	0.613445	2.49679	1.86063	1.42984	0.963907	1.11813
	1.26894	1.13191	1.26729	0.946367	1.11213	1.39552	3.28601	1.68526	4.23837
	4.52174	1.46651	3.51673	2.57569	2.31408	0.981859	1.51144	1.51456	0.839114
	6.28431	2.68571	0.985795	1.98851	1.42491	2.0778	1.9876	1.21624	4.45205
	2.46405	3.72109	0.982592	1.44246	1.23248	0.864078	1.2795	2.8985	5.74359
	1.00836	1.76573	1.68414	1.01458	1.31554	1.6962	1.51579	5.87805	3.79845
	2.14	1.61824	0.807963	1.9031	2.67723	1.93077	1.32415	1.57908	1.52571
	2.06516	1.05168	0.921127	2.1026	2.3246	1.2367	1.17112	0.335616	1.26903
	3.12057	1.95279	0.828678	2.73134	0.685556	0.863806	1.26239	1.74929	0.836576
	1.1701	4.06522	1.07454	21.3158	2.14127	0.75188	1.24018	1.29835	1.58669
	2.17763	1.2139	0.978056	1.54401	2.62275	0.977564	5.72868	1.12364	1.39358
	1.52342	1.79562	1.10126	1.4847	1.71481	1.36218	1.08776	0.730835	2.29424
	2.39944	1.01722	1.65047	2.53398	0.894737	0.978852	1.21129	1.65108	3.65706
	1.51885	1.71889	0.913734	1.45862	0.840164	1.55639	1.33663	1.88623	1.54818
	1.97419	1.48148	1.51201	0.980969	1.51383	2.03953	99.6	1.36725	1.18232
	52.25	1.93204	1.93385	1.26554	1.07625	1.12867	3.20149	1.70472	2.76957
	0.942577	1.24158	1.06306	3.79557	1.99748	1.59058	2.25627	1.2483	1.53374
	1.40506	1.57816	0.955734	2.23028	1.75669	1.07121	118.5	4.90608	13.68
	2.19952	5.11215	1.14918	2.10505	1.32762	1.20225	8.67797	1.64065	2.2896
	0.640244	0.410526	0.923077	0.785786	1.35201	2.44813	1.93377	1.65419	2.55297
	3.71739	8.19753	0.364662	2.37566	1.80456	1.1094	6.85227	4.17544	2.01991
	1.20628	1.57968	1.05945	5.02395	2.57482	1.48737	3.29817	5.58974	2.16794
	0.995392	2.56805	0.903141	1.85938	1.70169	0.337292	5.92537	1.0386	1.46898
	1.50083	1.11848	1.02454	1.80069	1.34517	2.47016	2.47024	1.936	1.35455
	1.43455	1.28279	0.759587	1.47841	1.75084	3.20506	4.69434	3.77358	1.74312
	22.75	0.900541	0.583418	2.39781	2.01351	3.23695	14.3731	4.03213	2.30263
	2.01515	1.90541	1.16447	2.48056	2.32796	1.10173	4.18699	1.53276	3.35393
	1.82017	2.11111	1.50117	3.10963	1.28762	0.796367	1.77586	3.67516	1.31453
	1.32035	2.99543	0.560372	2.32868	6.11667	2.96491	2.79352	0.861325	2.50913
	1.47189	1.28082	0.869565	1.72039	1.16291	0.430322	14.463	0.659758	2.14198
	1.27993	9.64865	1.25951	2.76661	4.19948	1.50725	3.64182	1.41857	1.89355
	1.22429	4.31298	4.87444	1.00803	2.45116	1.08961	2.01985	1.23396	0.537545
	3.62195	1.64764	2.79154	1.35053	0.745856	6.80982	1.79096	1.21268	1.56214
	1.42549	1.71507	4.18367	1.26203	2.48988	3.78926	2.16765	2.2664	2.08704
	1.272	2.75451	2.95946	1.14054	1.29118	1.97863	14.8906	2.50543	0.817672
	7.49315	1.52975	1.9407	1.80197	1.33025	1.74684	2.38721	11.3026	2.69061
	1.7931	2.27046	1.68683	1.0671	3.23841	1.09312	4.03814	4.99482	1.2109
	2.49798	1.77049	0.920245	1.3952	4.12535	1.6732	2.32911	4.85791	2.36175
	2.17734	0.933333	1.725	2.07514	2.19615	3.1498	22	3.14068	2.54104
	2.01126	0.886772	1.32461	0.733953	4.0462	1.57294	1.21596	2.91809	2.44538
	6.45887	1.14688	0.919226	3.62069	4.18405	2.9537	1.21038	1.98408	1.64407
	1.91115	1.63415	2.23605	11.7891	1.34524	1.32386	2.56661	2.98601	0.25
	1.7011	2.4296	2.00917	1.05217	300	1.36643	3.76052	0.837705	1.95468
	1.16406	3.82584	1.91379	0.889163	3.34253	1.8556	2.22371	0.812757	1.01169
	2.55696	12.4471	7.54348	1.71472	1.41032	1.38331	1.55556	1.25567	2.10359
	0.898678	2.47482	0.961921	1.17283	8.78528	1.04248	3.50262	8.78378	3.01969
	0.814159	1.24802	2.36338	1.10938	1.752	6.41346	1.90925	8.58407	1.22099
	1.29442	2.06472	1.60345	2.39216	4.06984	2.69638	5.90517	1.15068	2.05892
	1.88969	2.31839	0.954984	1.31701	0.843277	1.47955	0.569444	2.00332	2.74125
	0.881132	1.30031	4.74236	0.861214	1.53846	2.88514	0.716438	2.57895	1.60377
	1.82438	1.10283	1.6245	2.17299	1.83648	0.25731	1.56364	2.46875	7.44355
	1.1162		2.09146	1.99783	1.5254	2.70758	2.09605	1.45395	3
	2.58661		19.6939	1.38995	1.99581	1.07802	296	1.95218	2.08558
	4.92035		1.37859	1.20985	2.2376	0.960184	2.62385	1.88943	1.88454
	2.90993		1.20056	0.922414	1.66556	0.689831	2.07712	1.54118	1.53393
	2.76125		0.553172	1.13412	27.5	0.965015	4.24034	1.18886	1.91897
	3.59593		5.02564	2.65882	4.82969	1.03187	10.2577	2.26943	1.05684
	3.34053		2.46784	1.22663	1.90486	1.22943	3.24731	2.24408	1.64019
	3.39348		1.53671	1.7085	5.35417	0.589552	1.73729	2.6947	1.64095
	2.37874		1.55926	2.43626	4.42724	0.543434	2.98072	3.30019	1.09507
	1.19187		1.16636	10.906	1.47582	1.82947	2.23891	4.35897	0.868597
	1.26918		1.03521	1.62871	1.03193	1.34735	1.26856	2.25753	1.04289
	2.92164		0.896215	0.899261	1.09921	0.93677	2.06729	1.96949	1.80297
	2.86592		1.34921	1.00368	1.16026	2.95152	3.51342	1.4695	1.55754
	6.88		0.901538	1.41498	1.16376	2.20794	2.54881	3.91748	1.64799
	1.94737		1.28108	1.10959	1.23191	0.778203	1.86536	1.03162	3.60377
	2.85366		1.15844	2.52615	8.71212	3.9148	1.80086	2.22727	1.29213
	1.20826		2.05882	1.31214	0.797122	0.643665	2.88778	5.44828	1.93985
	1.83333		1.10415	2.30041	1.37221	0.964286	0.868263	10.1918	1.81564
	1.03333		2.77247	1.48171	8.51087	0.86055	5.41667	4.43913	0.919753
	0.869691		1.65035	2.07988	2.1369	1.24911	1.66979	4.35836	2.69732
	0.994318		0.823529	4.30086	2.20513	5.18947	1.43301	2.05508
	1.23867		5.71032	3.23567	3.93333	1.92857	5.45327	0.868497
	0.75766		1.02529	1.18983	1.66016	3.3	4.06289	4.67699
	1.08892		1.99837	0.747646	1.32581	0.950549	4.01802	1.65577
	1.8328		1.15539	1.44182	1.25714	3.00439	1.10603	2.16768
	1.76053		1.32211	1.35021	1.64803	1.91358	4.34466	14.9833
	1.87761		0.946565	3.23451	2.23432	3.875	2.86544	6.00654
	1.36705		1.95093	1.50926	0.828125	2.6411	0.855072	0.870614
	2.70398		2.09396	1.45938	1.50865	3.13761	2.34615	2.10678
	3.85771		0.566807	0.913043	2.00299		2.54624	6.10909
	16.8333		0.960223	3.02011	0.816254		1.76906	2.22662
	4.51327		0.914669	1.2	2.0778		1.51327	1.08543
	4.13016		2.50065	1.75084	0.810617		7.43023	5.44554
	1.0473		2.99843	1.79404	1.94255		1.36419	5.56481
	2.06648		3.29724	1.65203	1.33837		2.03686	2.70031
	0.997972		7.57047	3.93778			3.10067	1.33172
	5.04527		1.01254	1.75974			2.77517	1.23906
	2.04102		0.956798	3.46056			1.31158	1.88889
	3.09903		1.23607	2.02882			2.89848	2.34756
	4.12698		0.690541	2.65753			3.7302	2.97712
	2.47426		2.89247	1.61629			1.16594	2.35052
	4.16912			2.04192			3.91391	2.32112
	2.53333			9.1982			2.07279	1.0793
	1.80482						1.81414	0.990724
	1.68497						1.75149	1.1383
	3.86402						1.53344	1.19298
	3.45139						3.37302	2.00983
	1.19588						2.17616	2.02239
	1.85938						3.19455	6.03226
	2.91016						1.84062	7.59701
	11.527						7.66154	2.93913
	3.26471							3.09426
	1.29412							2.39625
	1.27862							1.05109
	1.03027							2.20991
	1.8855							4.47872
	1.98575							4.23232
	1.3573							2.58871
	2.03073							2.56271
	1.48235							3.55782
	1.96226							1.70046
	6.18852							1.9359
	2.00688							4.31034
	1.99559							2.22344
	12.1429							1.46848
	1.64363							1.80923
	3.015							13.2982
	1.04							1.28173
								25.2
								3.07054
								0.607214
								2.6145
								2.40954
								2.13499
								2.04102
								3.21192
								1.26017
								1.56386
								1.73874
								1.75127

## Sheet: Fig 5C left
	Specificity												Growth Rate
	Control Lowest quartile	Control second lowest quartile	control second highest quartile	control highest quartile	0.25 uM DARPin rep1	0.25 uM DARPin rep2	0.25 uM DARPin rep3	1 uM DARPin rep 1	1 uM DARPin rep 2	1 uM DARPin rep 3			Control Lowest quartile	Control second lowest quartile	control second highest quartile	control highest quartile	0.25 uM DARPin rep1	0.25 uM DARPin rep2	0.25 uM DARPin rep3	1 uM DARPin rep 1	1 uM DARPin rep 2	1 uM DARPin rep 3			Concentration	growth rate	specificity
n	59	59	60	60	97	62	142	91	103	83		n	59	59	60	60	133	80	205	160	102	135			0	0.0118519	2.00688
median	2.00688	2.23891	2.10324	1.9102	1.70169	1.71698	2.12088	1.39552	1.2825	1.76116		median	0.0118519	0.0133333	0.0152381	0.0176508	0.0124444	0.0155624	0.0137634	0.0111111	0.0106667	0.0115033			0	0.0133333	2.23891
std error of the median	0.154148	0.166336	0.16889	0.112905	0.0757844	0.0994699	0.106809	0.0826387	0.0564304	0.0867512		std error of the median	0.000129979	9.53176e-05	9.26064e-05	0.000155179	0.000246128	0.000295046	0.000199108	0.000192129	0.000212157	0.000220176			0	0.0152381	2.10324
																									0	0.0176508	1.9102
data	1.51327	1.75149	3.59593	4.06289	3.65664	7.96491	2.74	2.38482	1.46685	4.74224		data	0.00857143	0.0126984	0.0144444	0.0161905	0.0121637	0.0162319	0.0117333	0.00977778	0.00592593	0.00868217			0.25	0.0124444	1.70169
	1.20826	0.869691	1.29412	1.26856	1.74691	1.08828	3.59539	1.51515	2.05412	1.54452			0.0096	0.0127363	0.0144444	0.0162319	0.0115556	0.0169697	0.0114286	0.00952381	0.0111111	0.0156863			0.25	0.0155624	1.71698
	2.07712	3.20149	1.80086	1.66143	1.54963	1.84982	3.27813	0.588083	2.68934	1.76116			0.00969697	0.0128	0.0144444	0.0162963	0.00888889	0.0152381	0.0115315	0.0121212	0.0104065	0.0129032			0.25	0.0137634	2.12088
	1.52342	2.77517	2.86544	8.67797	1.4597	1.69969	1.3533	3.74332	1.46237	1.21715			0.0097561	0.0128	0.0144444	0.0164103	0.0116364	0.0162319	0.0186667	0.00888889	0.0112281	0.0100741			1	0.0111111	1.39552
	1.80482	0.898678	2.76125	3.37302	1.01446	1.77313	3.68651	1.01622	7.17323	1.58824			0.01	0.0128395	0.0144762	0.0164103	0.0152381	0.0177778	0.0177778	0.00946237	0.00808081	0.0115942			1	0.0106667	1.2825
	11.527	1.03027	2.14	1.32035	1.42547	1.63636	12.5175	0.118943	2.43829	1.41757			0.0100901	0.0128395	0.0145455	0.0164539	0.0113661	0.014359	0.0169697	0.0145455	0.0114286	0.0115942			1	0.0115033	1.76116
	2.00688	4.69434	2.25627	1.50083	1.53757	1.62308	1.81347	1.13087	1.98384	1.49085			0.0101149	0.0128395	0.0145455	0.0165079	0.0123077	0.0156863	0.0133333	0.012381	0.0112281	0.0091954
	1.36705	2.37874	0.716438	6.85227	2.32455	3.85987	1.92857	0.69713	1.2825	2.15549			0.0101587	0.012921	0.0145455	0.0165079	0.014359	0.0195556	0.00909091	0.0123077	0.0109091	0.00864865
	1.51144	2.56661	1.56364	7.49315	0.961347	1.01241	0.175542	1.96104	3.18611	3.50331			0.0105051	0.0129524	0.0145455	0.0166667	0.0126984	0.0152381	0.0101587	0.0111111	0.00916667	0.0111111
	1.98575	2.17734	2.98072	1.7931	1.4359	7.58182	2.73367	1.48085	0.680115	3.21053			0.0105263	0.0129915	0.0145455	0.0166667	0.0109804	0.0162319	0.0164103	0.0133333	0.00860215	0.0133333
	4.18699	2.91016	2.46405	2.79352	1.27669	2.08459	1.46667	0.828892	0.539623	0.893617			0.0106667	0.0130081	0.0146237	0.0166667	0.0156863	0.0162963	0.0148148	0.0140351	0.0124444	0.0108642
	0.6196	4.03814	0.712018	2.07279	2.49679	1.40481	0.963907	1.86063	0.771831	1.71795			0.0106667	0.0130081	0.0146667	0.0166667	0.00941176	0.0164103	0.0140351	0.014359	0.0106667	0.0104348
	3.12057	2.32911	2.52618	3.77802	1.11213	1.13191	1.68526	1.39552	1.26729	1.11813			0.0107937	0.0130612	0.0146667	0.0168421	0.0109091	0.0228571	0.0108333	0.00533333	0.0112281	0.014359
	1.3357	1.16594	1.73729	1.32415	2.31408	1.46651	1.51456	0.981859	3.51673	4.23837			0.0108108	0.0130818	0.0147126	0.0168421	0.0118519	0.0205128	0.01	0.00811594	0.00761905	0.012043
	4.12698	1.97419	3.26471	1.24018	1.42491	2.68571	1.21624	2.0778	0.985795	0.839114			0.0108108	0.0131401	0.0148148	0.0168421	0.0152381	0.0174359	0.0166667	0.0177778	0.00774194	0.0138272
	1.94737	3.10067	1.36419	1.84062	1.23248	3.72109	2.8985	0.864078	0.982592	4.45205			0.0108425	0.0131507	0.0148148	0.0169106	0.0166667	0.0150725	0.012549	0.0133333	0.00910569	0.0152381
	1.88969	0.997972	2.03073	3.29817	1.31554	1.76573	5.87805	1.6962	1.68414	5.74359			0.0108642	0.0133333	0.0148148	0.0169697	0.0126316	0.0133333	0.0109804	0.0102564	0.0102564	0.0105936
	1.10603	2.04102	1.08776	2.17763	2.67723	1.61824	1.57908	1.93077	0.807963	3.79845			0.0109091	0.0133333	0.0148837	0.0169697	0.0109091	0.0177778	0.0121212	0.0133333	0.0193939	0.0169697
	1.23867	2.53333	1.43455	2.01126	2.3246	1.05168	0.335616	1.2367	0.921127	1.52571			0.0109402	0.0133333	0.0149333	0.0169697	0.0139683	0.0173913	0.0133333	0.0116667	0.00923077	0.0133333
	1.64363	4.24034	4.16912	1.76053	0.685556	1.95279	1.74929	0.863806	0.828678	1.26903			0.0109524	0.0133333	0.0150427	0.0171429	0.0184615	0.0228571	0.0111828	0.0126316	0.0164103	0.0104065
	1.48235	6.28431	3.85771	1.37054	2.14127	4.06522	1.29835	0.75188	1.07454	0.836576			0.0111828	0.0133333	0.0150538	0.0171429	0.01	0.012043	0.0207407	0.0108642	0.0213333	0.00927536
	3.28601	52.25	1.59833	2.32353	2.62275	1.2139	1.12364	0.977564	0.978056	1.58669			0.0112821	0.0133333	0.0150725	0.0172549	0.0169697	0.0166667	0.0139683	0.0133333	0.00888889	0.00977778
	0.881132	1.22429	14.463	0.995392	1.71481	1.79562	0.730835	1.36218	1.10126	1.39358			0.0113242	0.0133333	0.0150725	0.0172549	0.0091954	0.0141176	0.0172549	0.0121212	0.00977778	0.00654088
	3.24731	1.08892	1.21596	1.00836	0.894737	1.01722	1.65108	0.978852	1.65047	2.29424			0.0114286	0.0133333	0.0150725	0.0173333	0.0164103	0.0124444	0.0158333	0.00969697	0.0118519	0.0186667
	2.86592	3.09903	1.26918	1.83333	0.840164	1.71889	1.88623	1.55639	0.913734	3.65706			0.0115315	0.0133333	0.0151111	0.0173333	0.0147126	0.0138667	0.00888889	0.008	0.0124444	0.0100741
	3.86402	1.27862	4.51327	1.91115	1.51383	1.48148	1.36725	2.03953	1.51201	1.54818			0.0115556	0.0133333	0.0151111	0.0173913	0.00592593	0.0222222	0.0186667	0.0103704	0.0133333	0.0133333
	2.47426	3.015	6.88	1.08371	1.07625	1.93204	1.70472	1.12867	1.93385	1.18232			0.0115942	0.0133333	0.0152381	0.0173913	0.00533333	0.0177778	0.0137143	0.00888889	0.00827586	0.00888889
	0.868263	1.93377	2.06648	1.90925	1.99748	1.24158	1.2483	1.59058	1.06306	2.76957			0.0116667	0.0133333	0.0152381	0.0173913	0.0075	0.016	0.0141176	0.00933333	0.0124444	0.00598639
	2.87252	2.38721	1.68497	0.814159	1.75669	1.57816	4.90608	1.07121	0.955734	1.53374			0.0117333	0.0133333	0.0152381	0.0174713	0.00761905	0.0129032	0.00848485	0.00923077	0.0177778	0.0145455
	1.66979	0.569444	1.8855	7.66154	1.32762	5.11215	1.64065	1.20225	1.14918	13.68			0.0118519	0.0133333	0.0152381	0.0175238	0.0104348	0.0168707	0.0186667	0.0193939	0.00927536	0.00888889
	2.39944	1.82438	14.3731	2.70103	1.35201	0.410526	1.65419	2.44813	0.923077	2.2896			0.0118919	0.0135593	0.0152381	0.0177778	0.0126316	0.0136937	0.0115315	0.0186667	0.00969697	0.01
	5.04527	2.34615	2.46408	1.84241	1.80456	8.19753	4.17544	1.1094	0.364662	2.55297			0.0119298	0.0135948	0.0153333	0.0177778	0.0121739	0.0168421	0.0155556	0.014359	0.012	0.0100901
	2.06516	2.88778	1.16406	1.87761	2.57482	1.57968	5.58974	1.48737	1.05945	2.01991			0.0119728	0.0136296	0.0153846	0.0177778	0.0152381	0.0115942	0.02	0.0140351	0.0186667	0.0101587
	1.03333	5.41667	5.66923	1.85938	1.70169	2.56805	1.0386	0.337292	0.903141	2.16794			0.012	0.0136296	0.0153846	0.0177778	0.014359	0.0106667	0.0166667	0.0169697	0.0133333	0.0104348
	6.18852	2.01985	1.40506	1.21038	1.34517	1.11848	1.936	2.47016	1.02454	1.46898			0.012	0.0136434	0.0154386	0.0177778	0.012549	0.0145455	0.0140741	0.00952381	0.02	0.0164103
	2.22371	1.42549	0.994318	2.62385	1.75084	1.28279	3.77358	3.20506	0.759587	1.35455			0.0121212	0.0138272	0.0154386	0.0177778	0.0133333	0.0126667	0.0169697	0.00952381	0.0112281	0.0148148
	3.50262	1.8328	1.79096	4.34466	2.01351	0.900541	4.03213	3.23695	0.583418	1.74312			0.0121212	0.0138272	0.0154386	0.0177778	0.0114286	0.0166667	0.013913	0.0145455	0.0111111	0.0106667
	2.89848	1.27191	2.16765	2.17616	2.32796	1.90541	1.53276	1.10173	1.16447	2.30263			0.0121212	0.0138667	0.0154386	0.0177778	0.0153535	0.0127363	0.0115556	0.0105263	0.00583333	0.0184615
	3.91391	1.1162	14.8906	1.86536	1.28762	2.11111	3.67516	0.796367	1.50117	3.35393			0.0121212	0.013913	0.0154386	0.0182456	0.0101333	0.016	0.0145455	0.0101587	0.0116667	0.0118519
	7.43023	6.45887	1.2795	1.3203	6.11667	2.99543	0.861325	2.96491	0.560372	1.31453			0.0121637	0.0139683	0.0154589	0.0183333	0.0146667	0.011954	0.0147368	0.0111111	0.0116667	0.0162963
	2.90993	22.75	2.58661	1.3573	1.16291	1.28082	0.659758	0.430322	0.869565	2.50913			0.0122222	0.014	0.0155556	0.0183333	0.0141176	0.0124823	0.0106667	0.0213333	0.0133333	0.0112281
	2.01515	1.42984	3.45139	1.47189	4.19948	9.64865	1.41857	1.50725	1.25951	2.14198			0.012381	0.0140351	0.0156322	0.0184615	0.0115315	0.0112715	0.0124031	0.00990476	0.00813559	0.00982456
	1.7011	1.21129	0.75766	1.27993	2.45116	4.31298	1.23396	1.08961	4.87444	1.89355			0.012381	0.0140351	0.0156863	0.0184615	0.010303	0.0141176	0.0133333	0.0106667	0.0118519	0.0169697
	2.642	4.13016	1.55556	5.45327	0.745856	1.64764	1.21268	6.80982	2.79154	0.537545			0.012381	0.0141176	0.0156863	0.0185507	0.0157265	0.0166667	0.012381	0.0091954	0.0152381	0.0155556
	1.19187	1.81414	1.43301	1.17112	2.48988	1.71507	2.2664	3.78926	4.18367	1.56214			0.0123906	0.0141176	0.0157576	0.0186667	0.0127536	0.0156863	0.0193939	0.012549	0.0106667	0.012381
	2.92164	2.55696	5.92537	5.72868	1.29118	2.75451	2.50543	1.97863	2.95946	2.08704			0.0124444	0.0142222	0.0157895	0.0186667	0.0111515	0.0166667	0.01	0.016	0.0104762	0.0091954
	1.53344	2.85366	1.33663	3.51342	1.33025	1.52975	11.3026	1.74684	1.9407	0.817672			0.0124444	0.0142222	0.0158333	0.0186667	0.0129032	0.0110345	0.0129032	0.0121212	0.0126316	0.014359
	3.19455	2.23891	1.76906	1.26894	3.23841	2.27046	4.99482	1.09312	1.68683	2.69061			0.0124444	0.0142222	0.015873	0.0188235	0.014359	0.00711111	0.0133333	0.0109091	0.0106667	0.0109091
	1.48687	12.1429	4.52174	2.19952	4.12535	1.77049	4.85791	1.6732	0.920245	1.2109			0.0125	0.014321	0.016	0.0190476	0.0108772	0.0162963	0.0165079	0.0096	0.0109091	0.0103704
	1.272	1.31158	0.942577	1.9755	2.19615	0.933333	3.14068	3.1498	1.725	2.36175			0.0125253	0.014321	0.016	0.0190476	0.012549	0.0196491	0.0136585	0.00853333	0.008	0.00965517
	1.1701	10.2577	0.640244	1.77586	4.0462	0.886772	2.91809	1.57294	1.32461	2.54104			0.012549	0.014359	0.016	0.0190476	0.0114286	0.0137374	0.0118519	0.0102564	0.0133333	0.0154386
	1.20628	2.70398	3.71739	1.96226	4.18405	1.14688	1.98408	2.9537	0.919226	2.44538			0.012549	0.014359	0.016	0.0193939	0.0146667	0.0144444	0.0158025	0.00969697	0.0106667	0.0115942
	1.82017	1.0473	4.92035	3.39348	1.34524	1.63415	2.98601	1.32386	2.23605	1.64407			0.012549	0.014359	0.016	0.02	0.0123077	0.0111111	0.0177778	0.00948148	0.0124444	0.00784314
	1.51579	1.99559	1.19588	2.47024	300	2.4296	0.837705	1.36643	2.00917	0.25			0.012549	0.014359	0.016	0.02	0.0155556	0.0154386	0.0165766	0.00982456	0.0115556	0.0136752
	1.26239	2.09605	3.64182	4.01802	3.34253	3.82584	0.812757	1.8556	1.91379	1.95468			0.012549	0.014359	0.016	0.02	0.00761905	0.0177778	0.0123077	0.0133333	0.010303	0.0106667
	3.59729	2.54881	5.90517	2.54624	1.41032	12.4471	1.25567	1.38331	7.54348	1.01169			0.0126316	0.014359	0.016	0.02	0.0186667	0.0152381	0.0119298	0.00957265	0.0114286	0.00888889
	2.49798	0.965385	2.03686	1.9876	8.78528	2.47482	8.78378	1.04248	0.961921	2.10359			0.0126984	0.0144061	0.016	0.0207407	0.012043	0.0148148	0.0190476	0.0111111	0.0104348	0.0140351
	3.34053	3.62195	16.8333	0.855072	1.752	1.24802	8.58407	6.41346	2.36338	3.01969			0.0126984	0.0144444	0.016124	0.0207407	0.0154386	0.0128	0.0102222	0.014359	0.00784314	0.0133333
	3.76052	1.29442	17.4773	1.51885	4.06984	2.06472	1.15068	2.69638	1.60345	1.22099			0.0126984	0.0144444	0.0161404	0.0209524	0.0124444	0.0168889	0.0142857	0.01	0.00643678	0.0112821
			3.7302	2.06729	0.843277	2.31839	2.00332	1.47955	0.954984	2.05892					0.0161502	0.0222222	0.0123077	0.0142857	0.0142222	0.0118519	0.00941176	0.01
					1.53846	1.30031	2.57895	2.88514	4.74236	2.74125							0.0114286	0.0133333	0.0111111	0.01	0.008	0.0109804
					1.83648	1.10283	2.46875	0.25731	1.6245	1.60377							0.00987654	0.0172973	0.0107937	0.00987654	0.0145455	0.0122222
					1.5254		1.45395	2.70758	2.09146	7.44355							0.0118519	0.015	0.0146237	0.0114286	0.00946237	0.0108642
					1.99581		1.95218	1.07802	19.6939	3							0.0096124	0.0142222	0.0148148	0.00842105	0.01	0.0186667
					2.2376		1.88943	0.960184	1.37859	2.08558							0.016	0.016	0.00969697	0.0148148	0.0123077	0.0155556
					1.66556		1.54118	0.689831	1.20056	1.88454							0.011954	0.0116364	0.0144144	0.0155556	0.00857143	0.0129293
					27.5		1.18886	0.965015	0.553172	1.53393							0.0115556	0.016	0.0133333	0.0123077	0.0121212	0.0133333
					4.82969		2.26943	1.03187	5.02564	1.91897							0.0151111	0.0156863	0.0114286	0.0133333	0.0109804	0.00977778
					1.90486		2.24408	1.22943	2.46784	1.05684							0.0109091	0.0136937	0.0146237	0.0121212	0.00936937	0.0114286
					5.35417		2.6947	0.589552	1.53671	1.64019							0.0120635	0.0190476	0.00969697	0.0172549	0.0118519	0.00791667
					4.42724		3.30019	0.543434	1.55926	1.64095							0.0145455	0.0184615	0.0177778	0.00990476	0.0126316	0.0109091
					1.47582		4.35897	1.82947	1.16636	1.09507							0.0109804	0.0150725	0.0154074	0.00907801	0.00868217	0.00923077
					1.03193		2.25753	1.34735	1.03521	0.868597							0.0113778	0.0190476	0.0166667	0.0124444	0.00857143	0.0122222
					1.09921		1.96949	0.93677	0.896215	1.04289							0.0100392	0.0203922	0.0145455	0.0126316	0.0111111	0.00777778
					1.16026		1.4695	2.95152	1.34921	1.80297							0.0165079	0.0133333	0.00592593	0.0111111	0.00977778	0.015
					1.16376		3.91748	2.20794	0.901538	1.55754							0.0133333	0.0161905	0.0133333	0.008	0.00923077	0.0096
					1.23191		1.03162	0.778203	1.28108	1.64799							0.01	0.0177778	0.0133333	0.00888889	0.0112281	0.0106667
					8.71212		2.22727	3.9148	1.15844	3.60377							0.0133333	0.0109402	0.0174713	0.00646465	0.012549	0.0096
					0.797122		5.44828	0.643665	2.05882	1.29213							0.00952381	0.0115033	0.0177778	0.0146667	0.00833333	0.0128395
					1.37221		10.1918	0.964286	1.10415	1.93985							0.0130818	0.0142222	0.0148148	0.0106667	0.014359	0.00982456
					8.51087		4.43913	0.86055	2.77247	1.81564							0.0158025		0.011954	0.0123077	0.0104762	0.0117333
					2.1369		4.35836	1.24911	1.65035	0.919753							0.0149333		0.0173333	0.014359	0.00761905	0.013913
					2.20513		2.05508	5.18947	0.823529	2.69732							0.0177778		0.0146667	0.00811594	0.0104348	0.012549
					3.93333		0.868497	1.92857	5.71032								0.0139683		0.0133333	0.0266667	0.00914286	0.0121212
					1.66016		4.67699	3.3	1.02529								0.0116667		0.0113475	0.0106667	0.0111111	0.00740741
					1.32581		1.65577	0.950549	1.99837								0.0133333		0.012381	0.0118519	0.0104762	0.0148148
					1.25714		2.16768	3.00439	1.15539								0.0123077		0.0137374	0.0177778	0.00666667	0.0125
					1.64803		14.9833	1.91358	1.32211								0.016		0.0107937	0.0106667	0.00956522	0.0111111
					2.23432		6.00654	3.875	0.946565								0.0115942		0.0193939	0.00888889	0.0109091	0.0126984
					0.828125		0.870614	2.6411	1.95093								0.0103704		0.0133333	0.014359	0.0106667	0.00933333
					1.50865		2.10678	3.13761	2.09396								0.0114286		0.0128	0.0101818	0.00761905	0.0133333
					2.00299		6.10909		0.566807								0.0133333		0.0115942	0.0126316	0.008	0.0104065
					0.816254		2.22662		0.960223								0.0133333		0.00888889	0.00630303	0.00949153	0.0118519
					2.0778		1.08543		0.914669								0.00624113		0.0166667	0.0103401	0.00746667	0.0133333
					0.810617		5.44554		2.50065								0.01		0.0152381	0.0133333	0.01	0.0186667
					1.94255		5.56481		2.99843								0.0121212		0.0157576	0.0141176	0.015	0.014359
					1.33837		2.70031		3.29724								0.0133333		0.0154839	0.0113333	0.00869565	0.00615385
							1.33172		7.57047								0.0124444		0.01	0.00888889	0.0100741	0.0115033
							1.23906		1.01254								0.012549		0.0158025	0.0096	0.0133333	0.0133333
							1.88889		0.956798								0.0102564		0.016	0.00838095	0.0106667	0.012
							2.34756		1.23607								0.00987654		0.0112994	0.015	0.008	0.0125926
							2.97712		0.690541								0.0133333		0.0126316	0.0079602	0.00969697	0.0105263
							2.35052		2.89247								0.00853333		0.0139683	0.012549		0.00842105
							2.32112										0.0146667		0.0170667	0.00982456		0.0121739
							1.0793										0.01		0.0103401	0.0106667		0.00561404
							0.990724										0.016		0.0114286	0.0103704		0.0107937
							1.1383										0.0118519		0.0142857	0.00820513		0.0126667
							1.19298										0.0139683		0.016	0.0133333		0.0124444
							2.00983										0.0100546		0.0126667	0.0104065		0.00941176
							2.02239										0.0101961		0.0190476	0.012549		0.012381
							6.03226										0.0133333		0.0124731	0.0222222		0.00888889
							7.59701										0.0115942		0.0148148	0.0133333		0.0148148
							2.93913										0.0146667		0.0162963	0.0109091		0.0140351
							3.09426										0.0133333		0.0186667	0.0133333		0.016
							2.39625										0.0151111		0.00820513	0.0108333		0.0128736
							1.05109										0.0130612		0.0115556	0.0111111		0.0117829
							2.20991										0.012		0.0166667	0.00987654		0.00761905
							4.47872										0.0109804		0.0133333	0.0123077		0.0126667
							4.23232										0.0143089		0.0145455	0.0145455		0.0112281
							2.58871										0.0139683		0.0152381	0.00380952		0.00973545
							2.56271										0.00888889		0.0171429	0.00646465		0.0155556
							3.55782										0.0222222		0.0141497	0.00860215		0.0108642
							1.70046										0.02		0.0116667	0.0148148		0.012381
							1.9359										0.00888889		0.0141176	0.0114286		0.0113333
							4.31034										0.0144444		0.015	0.00833333		0.00888889
							2.22344										0.0138462		0.0121212	0.012549		0.0101961
							1.46848										0.02		0.0150725	0.00825397		0.0109091
							1.80923										0.0130496		0.0114286	0.0133333		0.012549
							13.2982										0.0109091		0.00982456	0.00952381		0.0110345
							1.28173										0.01		0.0142723	0.0104762		0.0156863
							25.2										0.014359		0.0177778	0.0112821		0.00952381
							3.07054										0.016		0.012549	0.0106667		0.0127536
							0.607214										0.0157576		0.00833333	0.015		0.0116667
							2.6145												0.0112281	0.00888889		0.0096
							2.40954												0.0163441	0.0118519		0.00987654
							2.13499												0.0135849	0.0207407
							2.04102												0.0207407	0.0114286
							3.21192												0.0143089	0.0106667
							1.26017												0.011954	0.0109804
							1.56386												0.00946237	0.014359
							1.73874												0.01	0.0111111
							1.75127												0.00910569	0.0116667
																			0.0152381	0.0133333
																			0.0133333	0.00848485
																			0.0193939	0.0114286
																			0.0146667	0.0108642
																			0.0151111	0.00941176
																			0.0155556	0.0111111
																			0.012549	0.016
																			0.0121905	0.0128736
																			0.0129293	0.00833333
																			0.012	0.00666667
																			0.0121212	0.0266667
																			0.0131217	0.0145455
																			0.0152381	0.00703704
																			0.0126316	0.00878049
																			0.016	0.0133333
																			0.0158025	0.0118519
																			0.0162963	0.01
																			0.0121212	0.0112281
																			0.0156863
																			0.0130496
																			0.0140881
																			0.0142222
																			0.0166667
																			0.0137634
																			0.0114815
																			0.00987654
																			0.0150725
																			0.0165079
																			0.016
																			0.0142857
																			0.0133333
																			0.0133333
																			0.0138667
																			0.0138272
																			0.0111828
																			0.0107801
																			0.0133333
																			0.0147368
																			0.016
																			0.0111111
																			0.0141176
																			0.0123577
																			0.0153333
																			0.0184615
																			0.0117514
																			0.00980392
																			0.0177778
																			0.0118519
																			0.0142222
																			0.0139487
																			0.0184615
																			0.0133333
																			0.013037
																			0.012549
																			0.0119149
																			0.0118519
																			0.0186667
																			0.0133333
																			0.0115723
																			0.0104348
																			0.016
																			0.0180952
																			0.0133333

## Sheet: Fig 5C Middle
	Time to catastrophe
	0 uM DARPin rep1	0 uM DARPin rep2	0 uM DARPin rep3	0.25 uM DARPin rep1	0.25 uM DARPin rep2	0.25 uM DARPin rep3	1 uM DARPin rep 1	1 uM DARPin rep 2	1 uM DARPin rep 3			Concentration	Time to catatsrophe
n	150	116	159	74	115	168	88	143	104			0	174.72
mean	174.72	158.224	163.434	155.432	183.704	175.607	150.818	137.497	172.558			0	158.224
std error	8.24949	8.05786	6.82747	9.56562	9.46855	7.49191	9.19377	6.42424	8.5624			0	163.434
												0.25	155.432
data	300	228	156	138	342	150	288	180	258			0.25	183.704
	120	96	168	66	180	252	246	168	102			0.25	175.607
	222	66	78	126	330	222	114	264	186			1	150.818
	84	276	168	138	84	60	198	216	540			1	137.497
	102	84	78	90	366	90	84	186	138			1	172.558
	228	126	150	156	78	66	114	66	138
	72	102	138	102	78	192	264	168	288
	192	138	138	90	126	126	192	78	96
	78	84	60	210	102	78	186	72	162
	162	96	84	276	102	108	90	72	138
	114	186	150	108	264	228	60	114	78
	360	96	228	156	324	192	114	78	186
	90	78	102	42	210	240	84	180	162
	96	210	84	78	96	96	186	138	438
	132	162	108	156	114	102	246	54	66
	240	108	114	138	132	102	78	72	168
	102	78	300	108	126	132	66	78	246
	90	114	378	162	78	186	156	60	138
	78	60	78	138	66	54	78	96	180
	120	78	138	42	174	102	30	114	318
	186	174	168	186	78	192	108	162	60
	66	102	156	96	174	60	180	72	270
	162	252	114	102	108	210	54	66	216
	120	246	198	90	180	102	90	132	294
	132	246	54	150	192	132	60	120	132
	294	132	414	72	552	120	174	216	78
	504	132	114	126	114	72	90	72	162
	306	60	120	90	276	72	36	120	270
	234	72	228	186	84	144	138	312	78
	66	54	48	294	78	216	198	66	108
	66	126	228	114	204	66	120	60	114
	246	108	78	414	108	276	60	78	114
	84	108	258	198	126	180	72	114	66
	414	66	114	240	198	132	48	66	168
	228	108	192	48	120	228	114	168	78
	90	66	84	402	102	258	72	168	108
	120	48	150	150	222	336	192	66	114
	96	144	126	174	264	66	96	228	138
	114	228	78	282	234	144	96	126	204
	84	54	96	204	276	186	96	72	234
	84	216	96	96	330	120	354	60	300
	210	234	198	96	186	126	108	210	114
	270	174	456	174	456	492	84	120	96
	204	174	144	108	204	108	210	174	156
	66	180	240	114	126	162	168	102	240
	282	132	162	198	120	108	114	90	102
	78	108	210	144	78	222	150	66	144
	168	234	180	144	72	78	264	132	162
	96	312	114	114	84	228	144	150	60
	144	216	120	72	60	84	90	150	72
	162	192	132	168	186	168	180	156	198
	396	84	180	108	114	180	264	132	120
	144	240	96	300	312	252	138	270	168
	96	186	138	168	126	186	408	114	132
	252	204	78	240	162	132	66	72	144
	72	54	120	222	270	222	192	234	96
	114	420	258	96	516	168	78	78	330
	66	150	132	90	174	186	132	240	300
	126	222	270	60	180	54	222	108	162
	138	66	258	330	360	270	108	144	150
	168	138	72	120	132	96	114	162	138
	156	132	120	102	252	264	258	84	132
	90	66	114	222	264	288	72	114	108
	162	60	78	84	306	84	180	108	192
	174	336	120	156	450	174	156	72	126
	102	108	78	138	126	90	114	78	240
	126	120	360	84	144	162	102	84	246
	144	108	294	102	240	120	192	132	108
	162	126	168	372	84	120	156	102	84
	438	204	138	168	162	282	168	282	60
	354	96	90	54	150	168	126	90	78
	276	198	78	234	54	198	138	114	306
	144	96	102	306	126	252	210	144	72
	210	216	126	180	192	66	72	162	120
	144	246	132		84	144	168	396	216
	48	210	132		390	276	552	120	228
	210	60	78		150	96	132	120	276
	144	108	204		138	84	120	78	252
	126	156	198		210	132	126	78	240
	120	300	138		120	186	180	138	180
	150	390	150		132	162	354	30	168
	126	150	114		282	120	96	120	162
	594	192	240		330	354	96	120	54
	180	72	132		168	114	276	180	114
	84	114	240		180	126	270	78	60
	270	456	132		102	150	90	330	174
	222	108	198		78	168	180	114	258
	120	90	306		162	480	132	330	240
	180	78	156		132	84		294	114
	168	144	78		300	372		72	378
	546	132	144		120	162		102	72
	78	90	132		120	108		240	162
	180	78	252		108	180		150	168
	234	168	252		126	180		210	240
	150	150	144		366	96		96	126
	120	378	234		288	108		402	204
	108	300	234		138	66		102	132
	120	300	132		240	210		120	174
	402	180	90		96	294		156	102
	228	288	138		180	576		84	168
	234	90	72		294	408		246	276
	102	90	60		120	96		102	96
	276	96	156		102	132		72	300
	162	90	114		246	138		132	324
	168	66	144		126	126		132
	90	186	270		126	228		192
	126	252	192		72	426		144
	276	222	384		72	72		324
	372	54	108		144	102		78
	258	384	132		312	96		66
	180	186	138		282	186		198
	204	240	114		192	318		186
	78	192	168		156	108		54
	240	96	96		150	246		84
	90	210	60		132	348		192
	108	168	132			186		102
	228		108			192		252
	180		288			144		108
	120		108			66		84
	138		198			120		156
	234		138			180		90
	216		306			72		96
	96		168			204		108
	90		114			198		108
	42		252			240		84
	180		168			378		120
	174		342			168		102
	90		162			114		78
	72		120			162		72
	246		78			108		96
	222		90			102		96
	162		234			282		168
	108		72			318		162
	84		78			270		102
	144		108			144		90
	96		438			186		174
	162		150			138		96
	126		324			126		264
	228		84			90		66
	96		216			168		492
	108		132			84		108
	78		264			150		144
	372		426			162		114
	132		318			282
	90		138			108
	174		132			228
	156		96			90
	324		60			144
	420		102			102
	336		180			240
			102			78
			90			354
			96			72
			318			90
			162			390
			54			78
			360			360
			246			270
			210			102
						282
						162
						60
						456
						318
						138
						120
						168
						120

## Sheet: Fig 5C right
	0 uM DARPin	1 uM DARPin
n	43	50
mean	179.666	256.121
std error	16.6185	14.6852
data	262.453	227.809
	124.735	213.031
	149.004	376.419
	108.184	353.043
	107.806	213.608
	245.081	158.208
	136.84	103.021
	131.163	214.761
	176.677	180.079
	136.425	361.772
	139.654	251.093
	115.255	332.618
	745.647	515.41
	193.951	269.747
	191.774	132.394
	166.071	406.277
	141.799	121.027
	178.827	445.555
	87.5274	340.919
	114.842	399.221
	270.464	214.448
	154.94	403.838
	110.512	315.067
	182.784	270.817
	111.821	200.005
	131.128	285.052
	123.781	171.708
	111.203	343.719
	262.381	230.639
	187.749	323.253
	176.116	126.164
	106.056	323.57
	116.042	150.259
	149.097	266.355
	270.074	411.762
	127.685	117.727
	425.965	192.358
	125.522	115.853
	256.963	356.421
	171.138	355.686
	252.347	201.71
	143.441	196.546
	104.707	139.206
		134.544
		187.721
		426.472
		182.19
		160.858
		148.4
		237.702
