# Supplementary material for: Rapid binding to protofilament edge sites facilitates tip tracking of EB1 at growing microtubule plus-ends
Source: eLife. 2024 Feb 22;13:e91719. doi: 10.7554/eLife.91719 (PMC10883673; doi:10.7554/eLife.91719)
Supplement: Figure 6—source data 1. [file elife-91719-fig6-data1.xlsx]

## Sheet: Fig 6. B
	No DARPin	DARPin
n	21	18
median	0.339357	0.104586
data	0.544229	0.0793144
	0.290189	0.145576
	0.403141	0.140618
	0.326232	0.0631254
	0.478288	0.0607643
	0.348568	0.19349
	0.129312	0.0504776
	0.235934	0.139527
	0.277824	0.129858
	0.581544	0.069033
	0.339357	0.13095
	0.460422	0.0119729
	0.45611	0.131194
	0.532468	0.0495514
	0.328888	0.16829
	0.441453	0.0581669
	0.278678	0.0711732
	0.529031	0.146331
	0.306961
	0.220703
	0.336258

## Sheet: Fig 6. D
	No DARPin	DARPin
count	225	225
average	2.48056	1.90435
Data	1.49077	1.51737
	1.34876	1.25385
	1.65492	1.78203
	2.74223	1.50997
	1.96252	1.49028
	1.88838	1.53038
	2.25099	1.46595
	1.91641	1.23692
	1.82203	1.67588
	1.95891	1.96181
	1.31548	1.4495
	2.25464	1.5908
	2.78547	1.55398
	1.28043	1.56325
	1.67748	1.91212
	1.79315	1.77346
	2.10743	1.54545
	1.42088	1.86123
	1.87831	1.98561
	2.06777	1.65313
	1.32702	1.67016
	1.58978	1.45591
	1.37145	1.64304
	1.72416	1.6911
	1.81971	2.78542
	1.26392	2.07595
	1.4713	1.26823
	1.51492	2.03512
	1.72141	2.08944
	2.63927	1.28518
	1.61572	1.65057
	1.49982	1.82665
	1.54313	1.54734
	1.58229	1.58214
	1.27826	1.82596
	1.70379	1.57759
	2.33454	1.97192
	1.79755	1.524
	1.75468	1.67257
	1.24516	1.35096
	1.32096	1.53623
	1.38409	1.36119
	1.35103	1.33763
	1.97347	1.27662
	2.07714	1.96345
	1.45174	1.40387
	1.18913	1.43922
	1.8284	1.83909
	1.90509	3.19975
	1.50667	1.20752
	2.59271	1.42572
	2.33039	1.72683
	1.91815	1.8636
	1.83742	2.33794
	3.11781	1.88416
	3.40025	2.33214
	2.24271	1.27446
	2.02284	1.39574
	1.93531	2.20737
	2.63097	1.8428
	1.85887	2.21663
	1.83706	1.48827
	2.176	2.65772
	2.42178	1.88513
	2.55597	1.6905
	1.1369	2.06351
	1.71064	1.87738
	1.98154	1.79681
	3.43875	2.05741
	3.36864	1.9145
	1.94852	1.71708
	2.12008	1.5708
	3.72862	1.83972
	2.5141	1.14574
	1.79073	1.53309
	2.02363	1.62396
	3	2.10931
	2.7036	2.57385
	2.65314	3.00946
	2.96608	2.16978
	1.49122	2.6209
	1.83127	2.13498
	2.13005	1.95444
	1.95227	1.79188
	1.91806	2.51335
	2.30164	2.47218
	1.62781	3.37298
	1.57983	2.45683
	2.91475	2.277
	3.98522	2.06286
	2.03733	1.82737
	2.06725	2.41827
	2.59012	1.9958
	2.11922	2.40295
	2.69512	1.74707
	1.79375	3.94558
	2.41925	3.81569
	2.39862	1.44334
	2.36559	2.80033
	2.08973	3.82579
	3.18947	1.56399
	1.71769	1.32984
	3.29073	1.29374
	2.93424	1.03755
	2.87177	1.97909
	2.4342	1.38892
	2.57584	1.54411
	2.141	1.09308
	3.65969	1.97667
	2.687	1.26828
	5.33527	1.32603
	3.03089	2.15217
	2.32372	1.47066
	3.33037	1.74438
	2.6747	1.28291
	2.67683	1.4658
	3.66951	1.14055
	3.09178	1.43009
	3.34045	1.60098
	3.58971	1.48195
	2.38849	1.38623
	3.78893	1.15285
	2.5117	1.61229
	2.07229	0.88567
	3.25419	1.60261
	2.53297	1.6296
	1.42437	1.64961
	2.73108	1.84633
	3.14543	2.09091
	3.98121	2.2793
	4.89982	2.08142
	2.95062	1.57374
	1.54108	3.12417
	2.23048	1.29514
	3.26953	2.16579
	3.25434	2.50517
	2.35484	2.54219
	3.36116	2.1185
	3.06954	1.69285
	2.6326	2.44491
	3.82678	2.31541
	3.5449	3.41486
	3.7306	1.88103
	2.27205	1.83081
	3.33012	1.59236
	2.34062	1.91065
	3.30758	2.80305
	3.34603	2.34086
	2.92589	1.73168
	1.93395	2.00433
	2.37055	1.28362
	2.74341	2.19384
	2.27295	3.60474
	1.94254	1.5905
	2.44793	1.799
	2.38767	1.75781
	2.5503	1.90323
	3.6496	1.73048
	2.42324	2.41635
	4.54127	2.07904
	2.70147	1.54926
	2.53806	1.60349
	2.95137	1.45111
	2.86829	1.82962
	2.75277	2.09145
	2.07363	1.82527
	3.40387	1.56459
	3.99829	2.35744
	2.90496	2.83918
	2.08784	1.9252
	3.62231	1.65336
	2.66297	1.54228
	2.56025	2.05102
	2.33964	1.3438
	2.77002	1.92775
	1.83167	1.44689
	3.62331	2.94872
	3.23205	1.95151
	2.63833	1.5651
	2.21352	2.05949
	3.04491	1.78004
	2.33895	1.98705
	2.34383	1.71261
	2.42456	2.15067
	3.28308	2.11796
	2.62877	2.4749
	1.95879	1.61238
	3.90776	1.93415
	4.02771	1.54922
	2.25871	2.04128
	2.87675	1.8634
	2.48745	2.15789
	2.54251	1.88545
	3.05977	1.87906
	1.86558	1.82279
	1.75269	1.87049
	2.18182	2.52872
	1.86506	1.39966
	2.29591	1.97174
	3.09459	2.375
	3.26555	2.06777
	2.18997	1.79196
	3.05201	1.87654
	2.74299	2.44283
	3.97642	2.21856
	2.12727	1.61102
	2.07127	2.84707
	3.57903	2.48455
	2.12358	1.98718
	3.57618	1.91731
	2.62488	2.22207
	2.74853	2.0037
	2.6736	2.62748
	3.72927	2.70729
	3.04712	1.57355
	2.5445	1.92648
	2.7979	1.91182
	2.39352	2.24817
	2.47993	2.13212
	2.0891	2.10861
	3.89386	1.7663
	3.40301	1.84697
	3.22535	1.77134
	2.99175	2.03077
	2.24498	1.76568

## Sheet: Fig. 6 E
	No DARPin	DARPin
count	1405	534
average	9.71133	8.83385
data	2.98191	22.5063
	3.50529	3.63304
	3.38491	2.97488
	3.02033	2.41014
	6.33473	2.36338
	2.06721	1.72701
	1.84981	2.39599
	6.23735	2.09418
	1.29385	3.32995
	2.3172	17.8053
	3.90404	8.73315
	3.02267	2.88953
	2.07537	2.47649
	3.4373	2.29778
	3.90913	21.6982
	4.468	8.51221
	3.96917	5.93486
	2.04309	6.0582
	1.88602	1.06315
	3.15993	2.47489
	3.63839	3.48936
	3.24345	3.34882
	4.06086	1.56261
	3.03843	45.1937
	1.43269	0.790038
	6.6591	3.76079
	2.65885	3.61518
	3.02646	4.77224
	2.3218	20.5361
	3.41127	2.43905
	2.91985	6.10056
	2.92107	2.72968
	2.39507	2.27589
	10.5285	28.1963
	2.24763	51.6927
	7.98831	24.3965
	19.2118	16.5708
	13.3096	2.2905
	4.19188	5.72058
	11.1494	31.0677
	46.2907	26.4163
	14.502	13.7388
	6.37161	4.35145
	21.2057	10.2915
	5.85008	2.62521
	10.7395	14.9414
	12.6074	3.75609
	11.3608	12.0273
	11.3455	29.2063
	11.0456	5.02547
	13.8898	5.28657
	13.4691	3.37145
	13.6244	13.1375
	13.503	5.10688
	8.68789	5.11165
	12.4005	16.0104
	14.4203	2.40735
	5.88915	5.41518
	7.34387	2.02607
	23.5314	20.5739
	6.65475	6.35525
	10.0693	2.50712
	24.4672	2.05433
	12.0817	7.68683
	12.3315	11.9876
	11.7422	13.556
	6.32453	17.4476
	12.0038	5.34425
	15.7285	6.58745
	14.5001	14.3339
	20.734	7.00534
	15.1441	12.1657
	11.8525	3.43481
	12.4149	3.09774
	9.35049	4.03079
	11.8475	1.99592
	43.1429	2.80695
	12.0475	8.55622
	16.5273	6.46397
	22.7885	5.55949
	11.3472	26.9225
	13.4094	7.51873
	9.55382	3.47971
	9.69913	7.72649
	7.84608	5.42831
	13.4851	18.662
	14.5136	5.74125
	5.13787	7.05662
	11.1792	5.75562
	13.8848	6.21411
	10.6173	2.93488
	16.4456	7.03992
	18.3426	7.33805
	13.0119	17.162
	13.1495	7.92237
	23.8169	5.04998
	10.4149	5.17365
	6.50956	16.5837
	15.7547	9.03092
	20.0532	4.10004
	10.7631	7.47129
	28.653	3.77511
	11.537	6.87575
	25.1059	5.62875
	13.423	4.78061
	9.04877	5.64682
	7.08541	5.64166
	2.69948	6.19318
	12.0215	4.58048
	17.9474	8.72852
	14.672	2.75747
	15.1439	8.99301
	34.6773	11.6115
	10.5875	18.014
	18.8064	10.2059
	18.9934	21.0475
	13.7119	3.23959
	13.2661	3.48134
	13.7249	4.2152
	13.3482	3.40033
	26.2594	10.6213
	10.1395	3.06508
	17.4289	14.4608
	11.8485	11.7173
	13.1288	3.84701
	9.60725	6.42319
	18.3129	4.39294
	14.8852	19.7459
	8.49365	11.8108
	14.3595	3.86342
	30.7807	15.9853
	14.6744	8.16487
	17.5749	3.1608
	14.2195	7.29265
	17.6553	9.51683
	12.7116	12.9645
	18.0096	0.647793
	12.9823	14.3712
	10.5201	23.9694
	15.4562	11.5132
	18.6554	8.01576
	12.6248	12.4355
	28.0766	1.77191
	8.76456	10.113
	11.2784	10.3816
	18.2828	8.93657
	13.2351	5.76834
	24.3608	8.73536
	8.83281	5.87622
	10.3924	4.15094
	10.5176	7.90818
	31.7142	8.53459
	15.2876	19.8446
	9.58643	2.63133
	5.15746	16.6381
	7.72292	4.16583
	15.1693	6.91223
	8.70909	4.79661
	19.9946	6.9293
	18.3581	9.31583
	11.9119	23.7041
	13.8968	6.99379
	17.9103	3.40197
	16.5785	6.25428
	14.4541	10.977
	11.5774	6.14085
	16.9345	6.36494
	8.39418	22.3561
	4.24928	5.51837
	33.5828	5.55969
	13.4736	7.91725
	13.8893	9.61111
	10.1764	17.5208
	21.0499	4.61976
	13.6749	7.98658
	14.816	1.67006
	11.8357	9.07886
	5.73074	6.99702
	10.1768	6.48643
	11.013	3.64347
	10.9434	7.60608
	8.68483	4.17962
	12.7173	4.75482
	12.4278	20.5654
	9.78895	6.4348
	8.42731	7.61697
	17.5472	5.51951
	14.6367	5.48406
	19.3493	26.6883
	13.6202	10.8805
	14.4728	8.56118
	8.94934	3.16038
	50.1215	6.4269
	10.0632	6.60139
	19.229	3.34984
	18.1847	42.6888
	13.474	8.5193
	10.8289	6.0174
	11.2141	5.23378
	15.7052	20.1239
	32.5852	2.17458
	15.2239	1.58643
	11.0325	5.28166
	7.43387	5.1884
	1.87737	9.01006
	5.83208	5.32738
	6.76424	14.0608
	6.41841	15.1163
	7.2208	2.15714
	6.94136	8.38356
	7.72781	5.53105
	8.99014	6.81764
	7.59796	3.94305
	7.42917	3.02745
	8.23523	5.08561
	7.32373	13.0603
	7.04598	23.3324
	7.62557	18.2804
	9.18295	19.3933
	6.55951	7.27253
	5.34552	10.1873
	8.11003	4.70353
	12.5015	11.3358
	5.90167	7.39065
	4.31188	38.4095
	7.15113	3.21895
	4.74457	17.6859
	10.483	20.7601
	8.99519	8.81927
	3.06203	37.714
	9.00475	2.30054
	6.78735	13.6066
	9.60002	9.8302
	7.18267	6.99068
	8.27083	4.24717
	9.05601	8.29749
	5.36601	5.31354
	7.92137	13.5406
	7.58249	10.5948
	10.2485	5.06177
	7.54237	4.53437
	4.62577	3.8632
	7.99099	15.2143
	4.65615	2.15929
	10.5811	3.01512
	10.3945	2.34499
	11.4633	9.17724
	4.08984	1.7621
	8.01633	1.77451
	9.57473	11.1797
	8.41524	2.16871
	9.96428	3.27022
	10.8036	13.8365
	8.11552	1.74697
	9.04339	2.28213
	6.85963	1.82533
	8.92402	10.5516
	6.43567	2.62854
	7.54589	2.72954
	11.021	2.78703
	3.57873	5.9849
	6.97126	4.08248
	9.33215	1.06074
	6.33741	3.38842
	6.0104	4.71507
	8.50049	3.39445
	6.53448	23.5535
	8.34685	8.84785
	10.296	3.60922
	8.64557	33.1721
	4.53415	2.4071
	7.41728	3.27321
	7.30241	8.34177
	1.91703	13.0057
	10.7551	5.76022
	5.291	8.23814
	3.84347	3.66826
	9.86309	3.54347
	6.62197	9.60279
	4.51182	5.76747
	9.42922	11.6234
	4.58755	3.17286
	2.89934	17.1106
	2.99639	17.9591
	8.10568	3.82435
	7.71795	10.5098
	9.25374	6.77874
	15.5757	2.32861
	4.77767	5.3756
	4.38287	5.60938
	3.37137	2.04185
	6.78395	6.97969
	5.15319	18.3599
	4.44963	3.42045
	9.9122	5.56959
	8.31271	17.8682
	9.62638	15.2803
	8.70272	4.86014
	6.85801	15.787
	11.9917	6.74709
	9.52294	11.4783
	4.19349	2.91337
	10.0769	1.77237
	9.4013	10.9334
	4.0192	3.22355
	4.29017	4.67609
	7.18404	24.6824
	4.56582	9.05085
	8.30896	16.3208
	11.5553	10.5262
	3.9952	6.29298
	14.8275	26.7729
	7.45501	2.34893
	7.50919	14.4104
	6.92049	3.18051
	3.89119	6.96846
	15.169	6.18879
	5.82036	8.37111
	9.18937	25.668
	6.84787	20.9419
	6.77848	18.888
	6.40014	8.34901
	7.0887	5.55698
	6.42086	55.6648
	3.30871	5.12902
	7.65401	3.42528
	4.57758	5.37271
	6.70684	11.2004
	7.81381	2.0277
	9.56592	7.24286
	8.30322	0.922496
	9.49782	3.36883
	6.56684	6.23697
	5.46999	3.89214
	8.49786	8.50109
	7.25659	4.88959
	6.47698	6.13173
	9.1417	4.22375
	10.2952	2.75711
	9.09072	3.49935
	12.1346	24.3687
	20.3491	3.045
	5.53074	3.65587
	7.12599	11.5205
	7.0062	12.4468
	13.0745	2.52262
	11.4271	2.24625
	10.1521	1.65846
	6.83761	3.97031
	7.92623	3.20835
	6.72085	2.89445
	2.35079	2.07212
	9.73978	2.15221
	6.77133	3.01876
	4.19416	2.71243
	5.11807	2.67724
	5.9644	1.4198
	7.20041	3.19332
	4.97304	4.72462
	12.9746	3.05136
	7.88198	3.25499
	5.13311	0.89411
	15.5999	1.1853
	19.6832	2.2365
	5.68913	2.76288
	4.78748	1.82916
	6.80044	17.7491
	8.51103	7.8977
	9.95121	4.38625
	7.82627	4.67678
	8.36066	3.16625
	5.38471	1.24027
	10.0411	3.4743
	8.27804	1.18209
	9.57657	2.00643
	9.64233	1.77314
	7.35181	1.84873
	5.73822	4.60986
	10.2749	13.9833
	7.41308	2.84712
	9.99905	1.30473
	8.81804	3.15887
	8.66707	5.18502
	4.72023	1.76371
	5.22182	3.48166
	27.8003	5.24207
	8.78897	4.51756
	7.74266	13.4466
	7.17913	0.997516
	17.9682	3.90897
	5.59792	4.60369
	7.30829	2.29293
	13.3977	2.57943
	8.87933	0.963048
	7.57296	2.69332
	8.63759	4.22448
	12.0664	0.998344
	10.0039	2.92411
	8.89886	2.91275
	15.3995	3.5105
	6.55011	2.94492
	7.90067	2.05415
	58.8429	12.9212
	4.95418	22.6536
	6.39548	2.68307
	8.86958	6.13247
	2.31802	5.21144
	6.8267	22.5763
	9.73598	2.98296
	9.28446	15.4718
	8.23198	21.5792
	10.2533	11.6274
	13.8979	4.25041
	7.52867	4.45118
	13.0104	4.05671
	6.38989	7.5915
	7.76268	5.60897
	10.7418	7.02257
	17.6243	26.4868
	5.95913	17.0987
	10.3555	1.68673
	18.5301	27.2001
	6.53686	13.1953
	8.49137	18.16
	12.3826	2.91669
	8.61794	1.29369
	4.19582	6.8139
	11.8803	4.7678
	2.62945	6.46093
	7.94592	11.0994
	22.6373	22.8553
	13.2986	3.38797
	7.24332	5.5578
	6.77333	2.25625
	3.22514	2.69351
	7.22111	3.80557
	6.57549	2.71415
	2.28852	4.35958
	3.40231	24.54
	7.40994	6.6073
	7.31108	0.846641
	3.60531	20.273
	8.80741	2.07681
	2.39008	4.61649
	6.09655	35.8294
	10.8962	2.9337
	7.31632	6.37072
	9.887	2.74294
	7.89931	3.40731
	7.32421	14.2753
	3.517	5.24533
	4.97934	8.02153
	10.4552	2.83046
	5.08463	2.49106
	13.5748	11.5295
	3.12346	4.85846
	10.5615	3.61875
	6.70041	18.425
	3.8896	2.60542
	18.0594	3.25436
	5.08819	6.02165
	8.45453	2.42585
	9.56405	3.99527
	4.44385	4.87438
	7.67798	6.13624
	8.56768	22.1648
	6.56099	11.561
	8.0157	11.8836
	1.71376	3.89218
	16.907	38.0646
	2.46759	44.0985
	9.7901	23.0983
	6.65595	37.425
	7.51173	28.0494
	9.48112	5.12703
	8.42913	13.8324
	2.16402	3.7971
	8.27819	2.48899
	6.28647	2.79309
	13.6202	3.86616
	4.01826	4.32929
	11.2207	6.03454
	13.4846	4.00742
	9.20639	5.19016
	6.43217	2.58605
	9.65192	1.60666
	4.54584	4.04815
	8.77294	3.74506
	4.61859	17.2233
	15.8227	4.06274
	7.57911	12.2849
	16.0311	21.345
	5.58401	14.557
	4.27302	3.49623
	6.09709	2.99378
	9.15856	3.95252
	14.0209	13.2541
	9.1839	2.06451
	18.6013	3.44275
	7.17035	10.1589
	11.4875	59.049
	6.57962	17.6649
	5.54693	12.2468
	9.74751	16.7026
	7.47264	2.29931
	4.84841	7.00299
	15.6442	13.9196
	19.9105	23.6688
	5.63574	3.17036
	11.5411	11.0387
	6.82252	20.527
	10.4268	23.9183
	5.05775	2.47872
	6.7921	3.73561
	9.12894	7.99123
	8.74536	3.58586
	9.66712	22.3233
	11.9826	21.8923
	20.7853	15.7601
	5.28341	4.45608
	6.74109	3.18519
	12.1698	34.7103
	5.27037	33.5444
	6.26128	33.6924
	7.80355	22.4935
	2.5986	13.5971
	11.0636	5.47235
	2.56029	3.12296
	5.04708	11.1695
	4.55427	9.18527
	13.0491	3.22455
	4.49135	2.45471
	3.79492	8.9923
	11.3618	9.72999
	6.36955
	6.58263
	3.55317
	7.01984
	11.4717
	6.10171
	8.70374
	11.0257
	2.23213
	7.13274
	14.039
	10.6112
	9.27719
	3.82214
	4.43082
	10.3144
	16.7394
	7.57452
	14.1989
	10.435
	11.6504
	18.569
	8.52909
	3.48254
	7.53639
	8.07303
	8.29137
	5.4882
	4.1197
	13.5963
	12.1781
	8.74234
	2.22262
	7.52849
	3.60098
	22.4161
	10.3757
	3.24837
	5.95831
	6.39442
	6.16238
	11.2042
	8.83259
	14.8254
	28.2563
	9.23079
	12.1818
	6.16495
	8.75049
	6.63371
	11.6723
	13.6873
	9.54746
	8.61267
	6.56015
	4.27188
	11.984
	7.08251
	13.548
	8.57073
	6.35306
	5.51548
	11.3603
	15.32
	17.3636
	11.868
	7.59887
	3.08051
	6.20912
	10.7795
	10.4735
	11.1473
	11.1967
	7.50782
	14.5672
	5.55332
	12.1057
	8.95854
	11.3312
	9.47664
	8.93478
	7.89842
	10.5367
	8.12484
	6.15347
	8.86279
	9.44305
	7.36974
	4.38381
	7.93835
	11.3593
	7.7073
	3.13599
	8.71887
	7.55896
	3.3346
	6.53208
	12.5813
	10.0436
	10.1613
	5.92285
	1.85127
	1.01189
	38.2052
	7.61009
	12.5438
	9.00422
	13.4962
	14.0744
	9.68962
	7.22773
	20.7793
	8.20647
	1.90218
	3.78606
	16.605
	1.08201
	6.01332
	8.11301
	11.0101
	6.792
	7.28083
	10.2917
	2.83246
	15.4244
	3.44873
	21.1568
	8.95841
	10.6995
	10.7684
	5.39179
	5.94379
	7.06114
	12.8851
	10.0798
	12.2586
	8.9062
	8.56423
	6.28188
	13.5396
	4.54256
	4.82269
	2.15727
	13.0243
	8.44882
	11.3634
	11.7362
	8.78974
	10.7189
	25.2193
	12.0947
	11.1538
	8.20421
	12.6661
	10.5527
	6.98234
	10.7378
	10.1485
	10.5238
	9.76576
	10.6975
	10.4724
	14.3586
	14.3426
	19.8494
	7.62706
	4.20091
	10.5532
	13.2509
	9.8343
	12.2713
	17.999
	17.8566
	6.10707
	9.44349
	9.20742
	5.81299
	9.84363
	8.64563
	6.86928
	7.59713
	4.80183
	7.35499
	9.87002
	14.5431
	11.2684
	15.7156
	11.637
	8.97605
	10.8292
	14.0188
	6.00048
	8.17495
	6.30767
	13.4006
	10.1939
	10.3779
	13.1318
	5.25232
	6.24526
	12.7122
	8.90837
	10.0001
	9.14318
	13.9456
	13.3315
	16.3682
	9.04278
	7.04118
	7.08769
	6.50186
	11.6178
	5.46431
	24.7229
	15.8575
	16.2913
	7.27439
	6.65478
	10.7281
	9.84943
	5.52444
	20.3037
	10.7892
	18.9996
	10.3982
	8.36228
	5.50058
	10.7147
	13.7093
	6.70535
	6.81457
	6.87531
	15.032
	9.93217
	7.42767
	8.86664
	11.9132
	16.9517
	7.74823
	7.21922
	13.7542
	9.62582
	6.0565
	13.8109
	2.4567
	5.05823
	3.59269
	17.0647
	11.3383
	9.51927
	7.43147
	6.03849
	9.22788
	6.08109
	4.45928
	7.51823
	8.4255
	7.26373
	5.2396
	11.4888
	13.3514
	7.8108
	10.2003
	7.11212
	7.32107
	5.89294
	9.2821
	7.67962
	7.76765
	8.75526
	13.3492
	12.9905
	8.88631
	10.6277
	3.79503
	5.40949
	10.9704
	13.1573
	12.1631
	10.8406
	7.13745
	7.4574
	8.57169
	22.7995
	2.44005
	3.68016
	8.5513
	7.30266
	16.9446
	9.6066
	8.76604
	10.4164
	10.3346
	13.3664
	8.01785
	16.4614
	2.0561
	14.1324
	24.037
	5.87433
	12.8177
	8.34723
	7.84336
	5.53443
	9.87744
	9.07013
	5.60486
	9.48021
	12.1227
	7.51596
	11.1639
	8.59471
	12.1002
	24.5446
	18.2876
	12.0519
	9.50379
	12.2249
	8.24026
	12.5214
	3.79023
	3.98616
	8.24227
	6.77109
	11.4492
	4.5354
	12.3853
	13.4003
	7.54038
	3.82011
	10.911
	14.2566
	10.8042
	3.18606
	8.51021
	11.4546
	9.17488
	10.4218
	11.2202
	11.6849
	10.9414
	4.86724
	11.4362
	12.5752
	9.39414
	5.04401
	12.2573
	7.17059
	15.1715
	7.09001
	9.76181
	5.90231
	9.79055
	9.64204
	6.07342
	8.42235
	2.70119
	9.40752
	8.38339
	10.1184
	11.8869
	10.0326
	9.33129
	9.57814
	12.4995
	12.1369
	10.2395
	11.3591
	11.8406
	7.97299
	10.6976
	6.28998
	9.29367
	6.53948
	5.28667
	13.4656
	10.4751
	7.81971
	5.11904
	11.771
	13.3503
	9.85573
	12.3122
	9.40516
	10.2951
	3.64206
	11.5364
	12.3302
	14.106
	9.87457
	23.813
	9.84791
	6.10589
	9.57843
	10.996
	9.34458
	5.12804
	5.56895
	11.7028
	13.512
	9.38336
	4.02213
	6.00642
	9.19841
	11.0815
	6.89619
	11.5364
	9.92283
	10.6996
	7.51622
	9.56784
	11.6228
	10.104
	9.66899
	14.182
	11.5338
	8.76689
	11.7401
	11.9901
	8.79109
	10.7424
	12.3564
	12.1868
	10.0879
	5.17742
	10.0693
	10.5707
	10.3045
	5.8905
	9.98791
	8.59845
	9.1525
	11.0982
	8.1872
	11.3686
	10.3748
	11.625
	11.1503
	12.2489
	10.9884
	13.1609
	10.2075
	7.37228
	10.0786
	6.74363
	32.4455
	10.4906
	15.8028
	11.2066
	11.0718
	18.0889
	8.80764
	11.349
	7.3925
	9.20643
	12.5789
	10.8864
	10.217
	11.3793
	8.02406
	11.7168
	8.34283
	12.1047
	10.3716
	11.3584
	7.95945
	12.331
	11.3531
	11.3946
	12.0431
	11.2077
	10.4079
	17.8213
	10.0567
	10.2333
	15.1822
	8.25422
	10.4412
	10.5405
	9.95619
	12.2609
	9.96774
	9.91196
	2.82919
	10.9171
	9.51305
	10.4809
	8.44014
	10.55
	8.16794
	18.2231
	2.02157
	4.2726
	5.99398
	10.7197
	11.6882
	11.5753
	8.98458
	5.61739
	11.0116
	10.8234
	5.82512
	8.7225
	12.8898
	11.2184
	8.84968
	6.43089
	10.1276
	19.7021
	7.49875
	10.1532
	11.8018
	10.1269
	10.6995
	11.5146
	2.10894
	17.3498
	2.68897
	5.47954
	6.67779
	7.99011
	4.61849
	5.96626
	8.68971
	7.09305
	6.42029
	13.8614
	4.25505
	7.43088
	4.74546
	5.26747
	16.9305
	11.4146
	9.14688
	8.60862
	16.0496
	12.7438
	5.63652
	11.1693
	1.84782
	5.96129
	1.15346
	3.53134
	10.2244
	8.11431
	6.62306
	4.51982
	0.784299
	6.50476
	4.99178
	6.95031
	11.1706
	5.65923
	11.6033
	4.67299
	6.1508
	8.99205
	7.34529
	4.28875
	4.55613
	3.29497
	7.63607
	24.4512
	1.68618
	7.4932
	5.86082
	8.12109
	4.57316
	11.6168
	6.02782
	12.1603
	9.72375
	7.14483
	21.8801
	4.0092
	6.22748
	1.17386
	16.1164
	11.2216
	14.9522
	8.20232
	5.87657
	11.4913
	3.59062
	6.26412
	4.99265
	7.32594
	6.11875
	4.28311
	6.27582
	9.9287
	18.464
	8.36225
	5.49226
	11.5272
	5.5795
	8.91552
	10.7947
	3.76888
	1.52312
	4.61709
	42.8572
	6.47855
	5.71212
	4.98418
	9.3727
	7.61796
	2.69738
	9.4721
	29.3133
	5.12656
	5.52071
	5.67174
	3.97131
	12.2685
	14.4637
	4.81274
	6.42013
	8.77548
	5.59017
	7.74977
	10.2395
	6.50389
	18.1835
	31.1697
	4.86463
	6.05927
	6.44159
	20.865
	0.532578
	10.5375
	6.20892
	7.99794
	7.49692
	8.50332
	13.091
	9.98614
	3.90359
	7.4363
	3.41674
	5.56822
	2.25989
	4.48802
	9.11876
	7.94637
	9.44663
	6.1238
	10.853
	7.09485
	6.16493
	25.8425
	3.92745
	4.79026
	7.80695
	4.54709
	14.8175
	5.03657
	10.932
	6.89354
	14.6938
	6.30919
	3.71426
	7.39474
	10.6738
	6.17187
	15.4832
	6.58993
	5.4559
	10.5126
	9.02841
	7.0815
	8.83656
	8.69626
	12.1552
	7.34512
	11.6529
	10.1113
	8.96415
	10.4163
	9.77074
	14.143
	9.93466
	11.2106
	4.36715
	8.65995
	9.09425
	8.38329
	11.728
	10.0495
	7.56609
	6.91064
	9.88742
	10.9835
	6.53223
	10.1378
	9.3387
	6.691
	8.74886
	9.1849
	11.6001
	7.36792
	9.42132
	10.0214
	9.04325
	19.659
	10.8987
	17.811
	10.4169
	9.64314
	7.91189
	10.2689
	9.34282
	7.75604
	9.19164
	8.5322
	9.7447
	7.71629
	10.7808
	7.31158
	10.0018
	10.9839
	6.1361
	6.75457
	10.6152
	19.2575
	7.92802
	8.87741
	8.08961
	9.31821
	9.08441
	9.22208
	10.4441
	21.9413
	10.5388
	10.5016
	4.0613
	6.69431
	8.90837
	9.83889
	10.4398
	21.8328
	12.7635
	8.37139
	11.7402
	10.0296
	10.8622
	14.2981
	7.96914
	7.52322
	13.187
	9.09454
	8.96716
	9.01032
	6.31898
	11.7813
	11.662
	11.7436
	8.37891
	8.62348
	10.6774
	10.1518
	7.6516
	11.2768
	10.2679
	9.91062
	10.8472
	8.04203
	15.0169
	11.4098
	11.9204
	8.89043
	13.8522
	7.91664
	11.8122
	11.7448
	9.79467
	7.92374
	7.14335
	6.29741
	12.0096
	6.14682
	9.41988
	10.3861
	8.81737
	10.4747
	9.60657
	10.8646
	11.309
	9.20347
	7.25787
	16.8923
	10.0201
	7.56596
	8.71046
	9.49235
	9.38954
	12.0331
	10.9462
	7.98671
	9.9994
	8.07071
	8.23232
	10.8512
	11.5911
	8.94081
	11.102
	10.9617
	10.3293
	12.0073
	10.331
	9.2462
	8.69153
	8.44608
	9.01522
	9.44172
	9.49026
	5.71004
	13.5581
	7.18178
	11.8554
	6.43334
	11.2143
	11.5663
	9.12009
	7.06624
	12.2779
	13.2769
	4.31097
	6.4819
	8.83498
	8.83217
	10.1026
	10.0928
	10.3462
	8.63821
	8.47394
	8.73407
	11.2559
	9.87735
	10.3623
	10.7899
	7.18039
	6.36132
	10.8663
	10.5154
	9.32323
	8.86427
	10.0874
	9.81815
	5.17596
	9.45167
	9.8468
	9.2018
	7.27812
	3.70013
	7.40583
	7.63839
	4.40129
	11.7621
	10.9462
	7.40734
	16.4541
	11.6748
	11.0128
	5.4935
	11.3215
	8.93473
	8.45574
	9.90087
	12.1703
	11.8268
